# Supplementary material
Source: PubMed Central journal article supplement (PMC3947597)
Supplement: NIHMS508882-supplement-01.pdf [file NIHMS508882-supplement-01.pdf]

## Supplementary Data

Synthesis and Biological Evaluation of Indole-based, Anti-cancer Agents Inspired by the Vascular Disrupting Agent 2-(3'-Hydroxy-4'-methoxyphenyl)-3-(3'',4'',5''-trimethoxybenzoyl)-6-methoxyindole (OXi8006)

Matthew T. MacDonough,<sup>a</sup> Tracy E. Strecker,<sup>a</sup> Ernest Hamel,<sup>b</sup> John J. Hall,<sup>a</sup> David J. Chaplin,<sup>c</sup> Mary Lynn Trawick,<sup>a</sup> and Kevin G. Pinney<sup>a\*</sup>

<sup>a</sup> Department of Chemistry and Biochemistry, Baylor University, One Bear Place #97348, Waco, Texas, 76798-7348, USA

<sup>b</sup> Screening Technologies Branch, Developmental Therapeutics Program, Division of Cancer Treatment and Diagnosis, National Cancer Institute, Frederick National Laboratory for Cancer Research, National Institutes of Health, Frederick, Maryland, 21702, USA

<sup>c</sup> Oxigene Inc., 701 Gateway Boulevard, Suite 210, South San Francisco, California, 94080, USA

\*Corresponding Author: Kevin G. Pinney

Telephone: 1-254-710-4117

Fax: 1-254-710-4272

Email: [Kevin.Pinney@baylor.edu](mailto:Kevin.Pinney@baylor.edu)

## Table of Contents

|                                                           |                |
|-----------------------------------------------------------|----------------|
| NMR Spectra, HPLC Traces, and HRMS for compound <b>25</b> | Pages S3-S10   |
| NMR Spectra, HPLC Traces, and HRMS for compound <b>26</b> | Pages S11-S17  |
| NMR Spectra, HPLC Traces, and HRMS for compound <b>27</b> | Pages S18-S24  |
| NMR Spectra, HPLC Traces, and HRMS for compound <b>28</b> | Pages S25-S32  |
| NMR Spectra, HPLC Traces, and HRMS for compound <b>29</b> | Pages S33-S40  |
| NMR Spectra, HPLC Traces, and HRMS for compound <b>30</b> | Pages S41-S48  |
| NMR Spectra, HPLC Traces, and HRMS for compound <b>31</b> | Pages S49-S56  |
| NMR Spectra, HPLC Traces, and HRMS for compound <b>32</b> | Pages S57-S64  |
| NMR Spectra, HPLC Traces, and HRMS for compound <b>33</b> | Pages S65-S72  |
| NMR Spectra, HPLC Traces, and HRMS for compound <b>34</b> | Pages S73-S79  |
| NMR Spectra, HPLC Traces, and HRMS for compound <b>35</b> | Pages S80-S87  |
| NMR Spectra, HPLC Traces, and HRMS for compound <b>36</b> | Pages S88-S94  |
| X-ray crystallography data of compound <b>10</b>          | Pages S95-S102 |

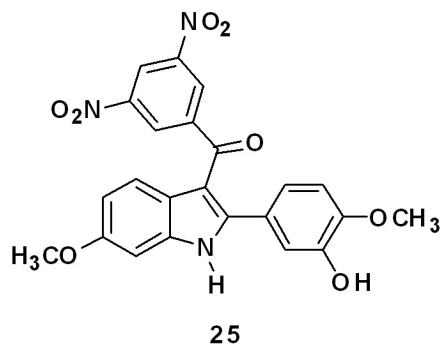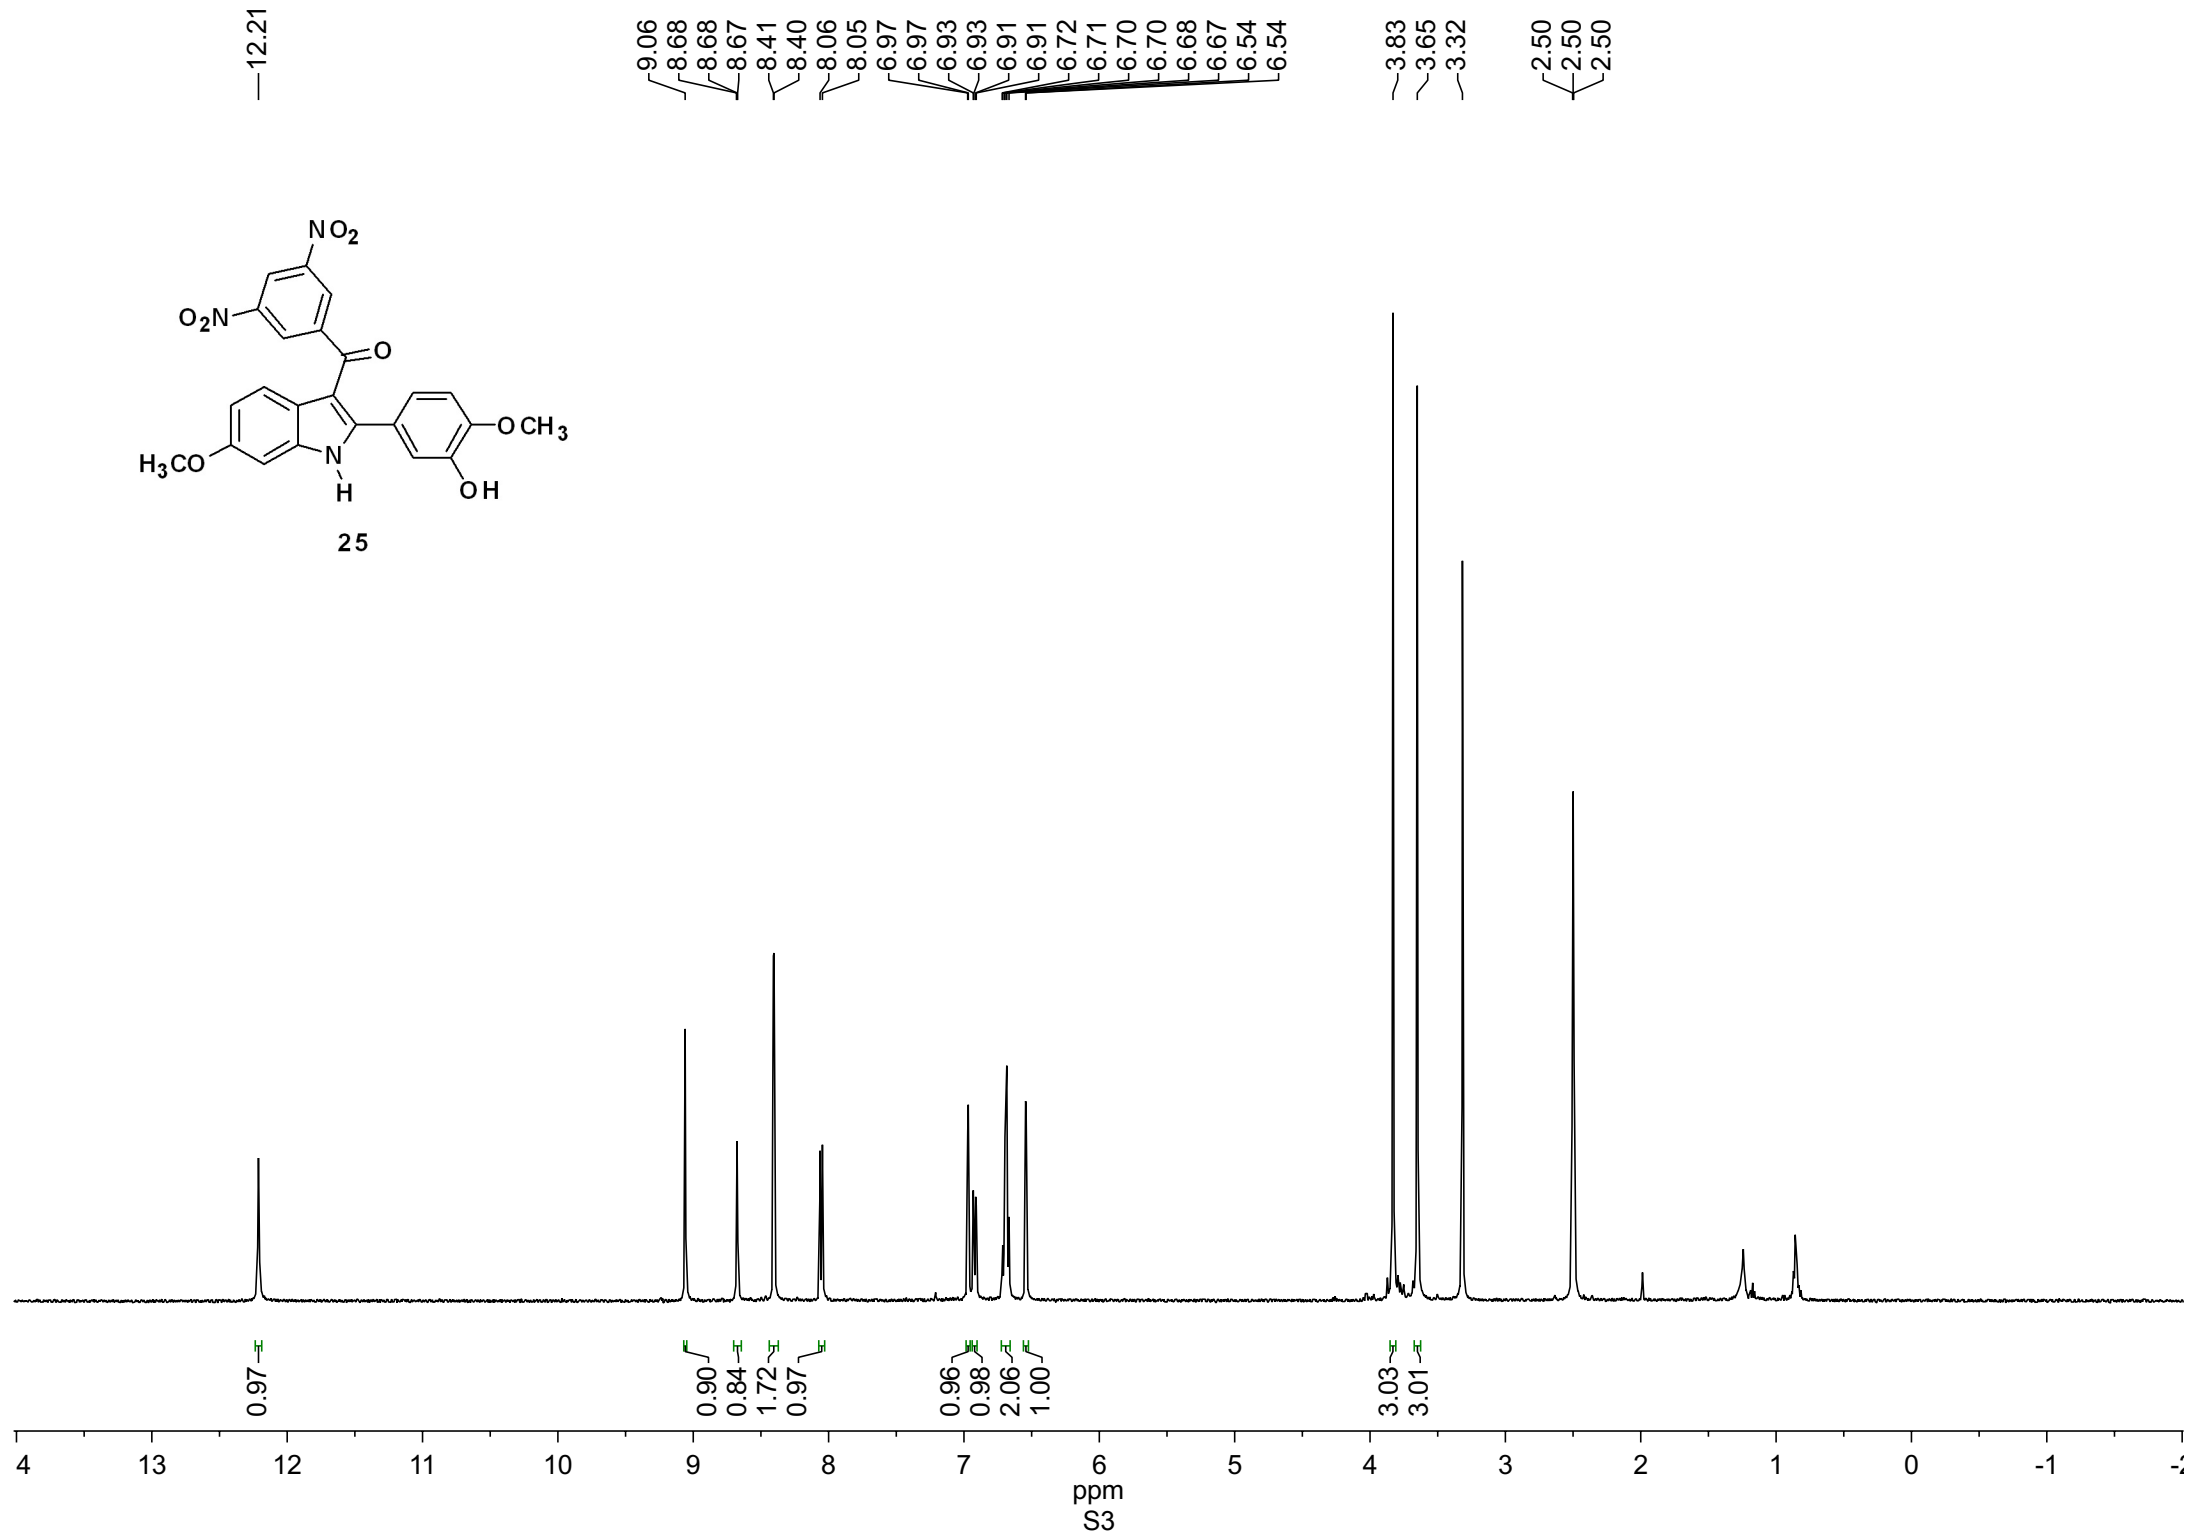

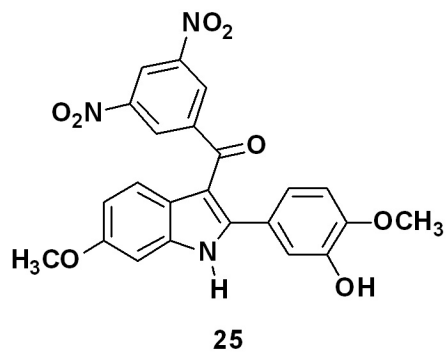

— 186.67

— 156.84

148.23

147.08

146.68

146.13

142.76

136.72

128.48

123.26

121.75

121.75

121.70

119.26

117.15

111.95

111.73

111.14

— 95.02

55.67

55.34

40.02

39.85

39.69

39.52

39.35

39.19

39.02

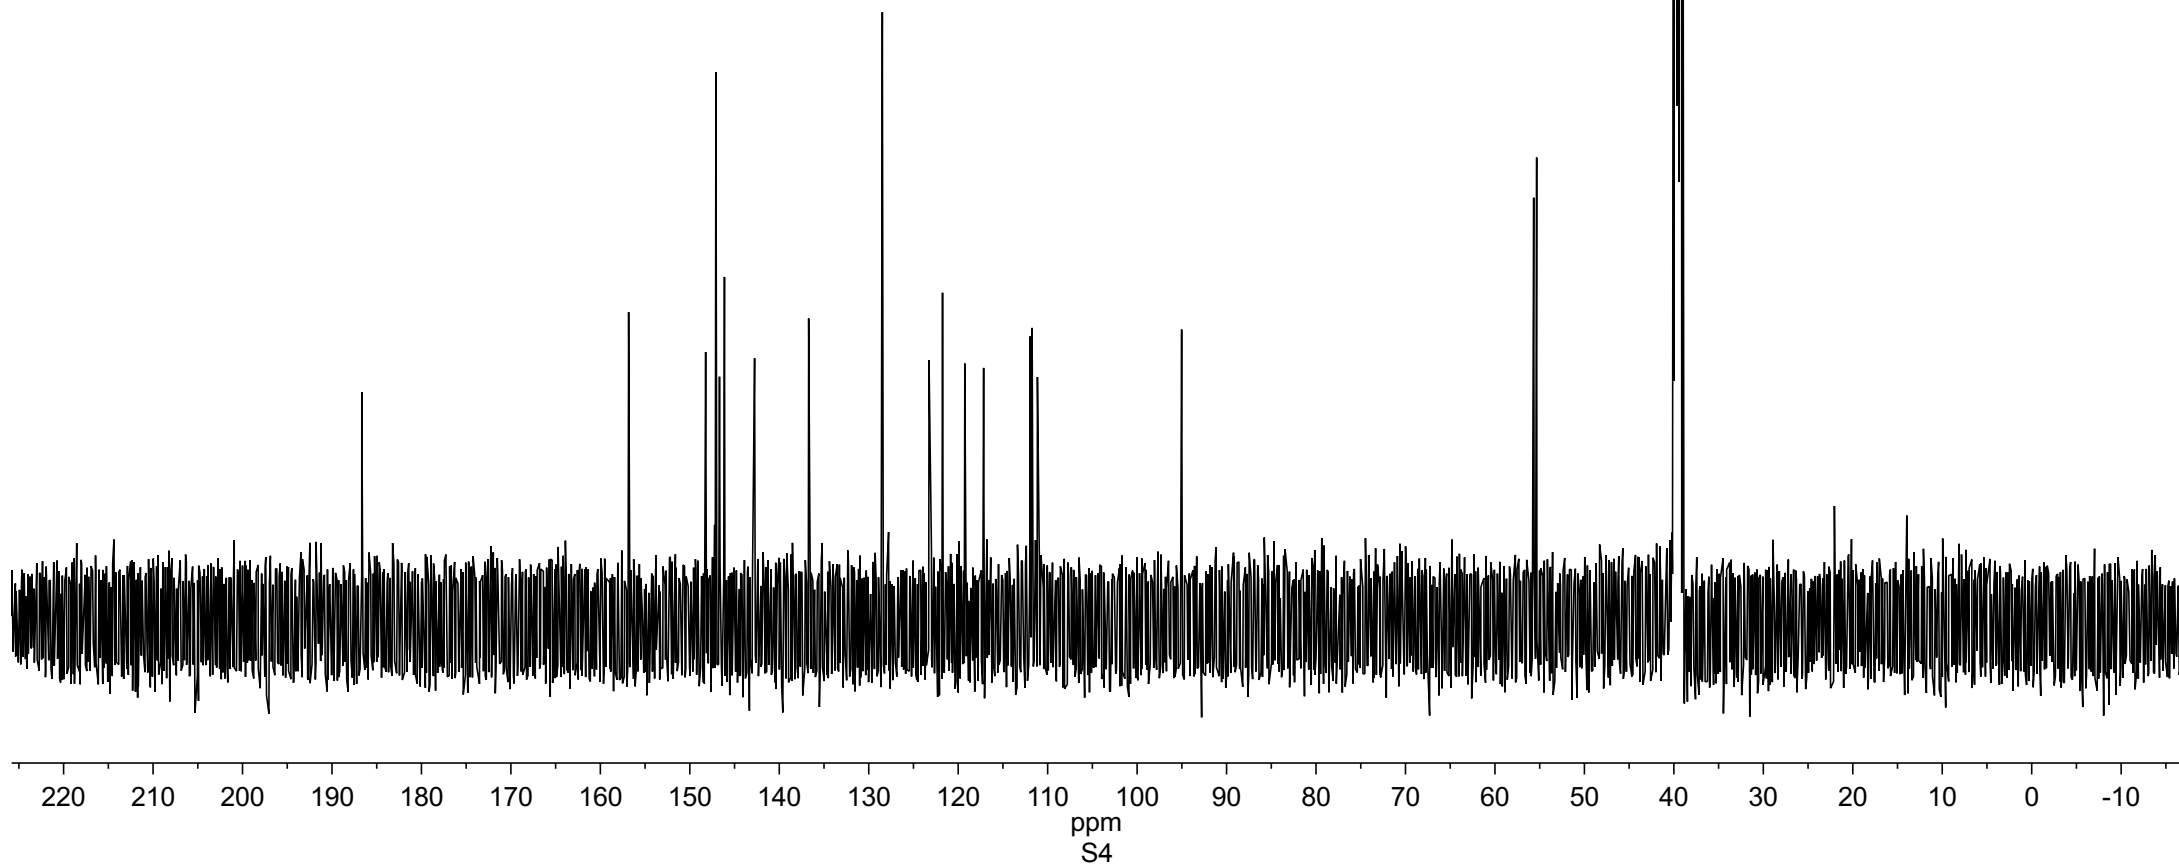

Sample Name: run1

### HPLC traces of compound 25

=====  
Acq. Operator : Matt Mac  
Acq. Instrument : Instrument 1 Location : -  
Injection Date : 1/9/2013 5:48:17 PM  
Acq. Method : C:\CHEM32\1\METHODS\MASTERMETHOD.M  
Last changed : 1/9/2013 5:30:58 PM by Matt Mac  
Analysis Method : C:\CHEM32\1\METHODS\MASTERMETHOD.M  
Last changed : 1/9/2013 2:04:11 PM by Matt Mac  
(modified after loading)

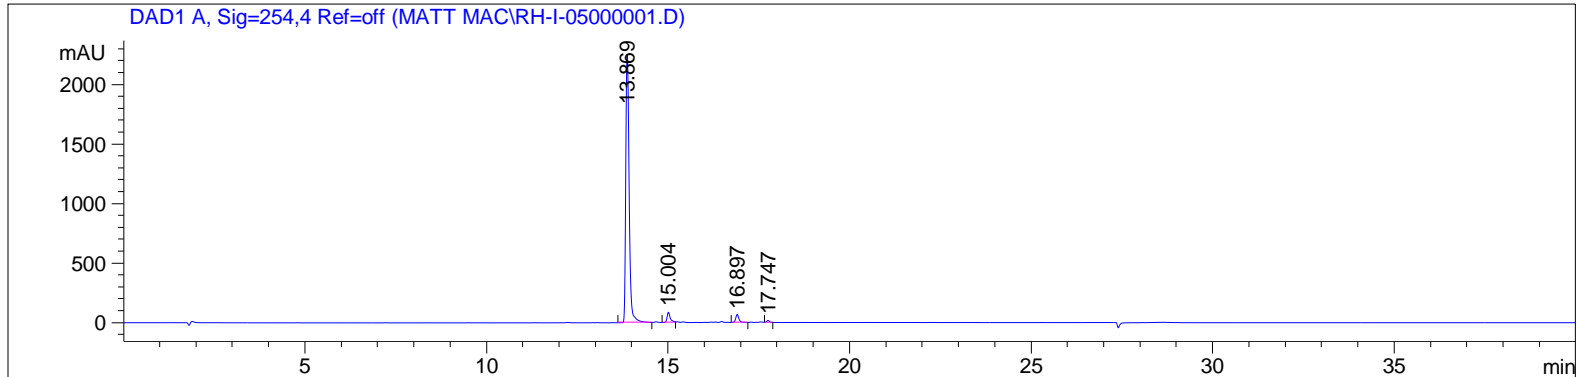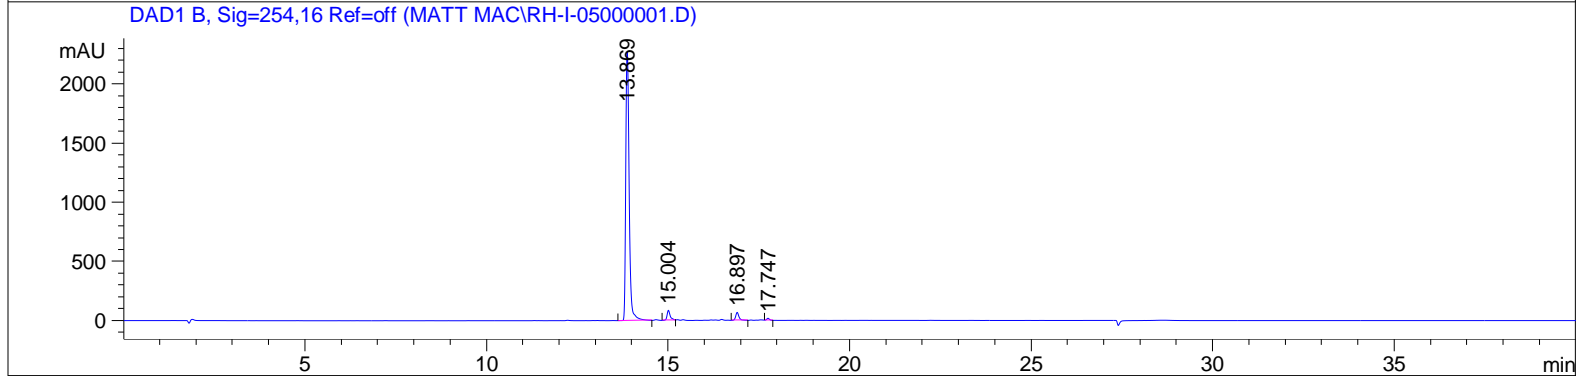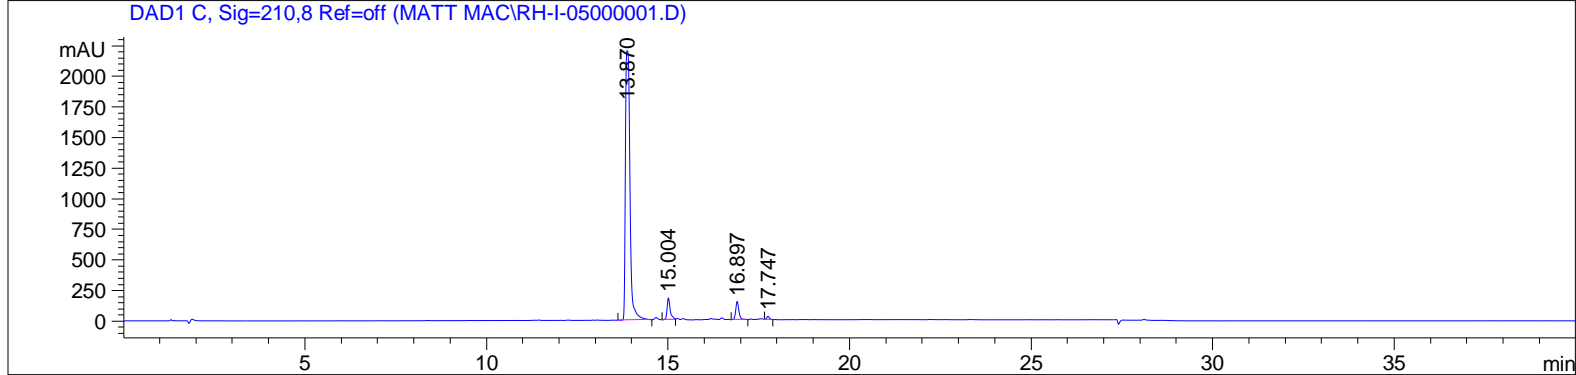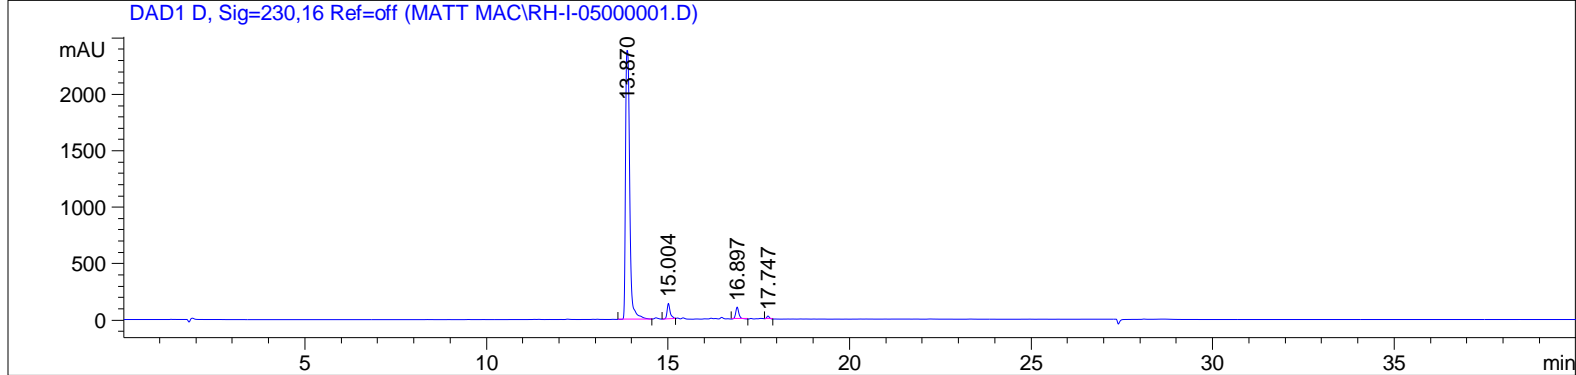

Sample Name: run1

## HPLC traces of compound 25

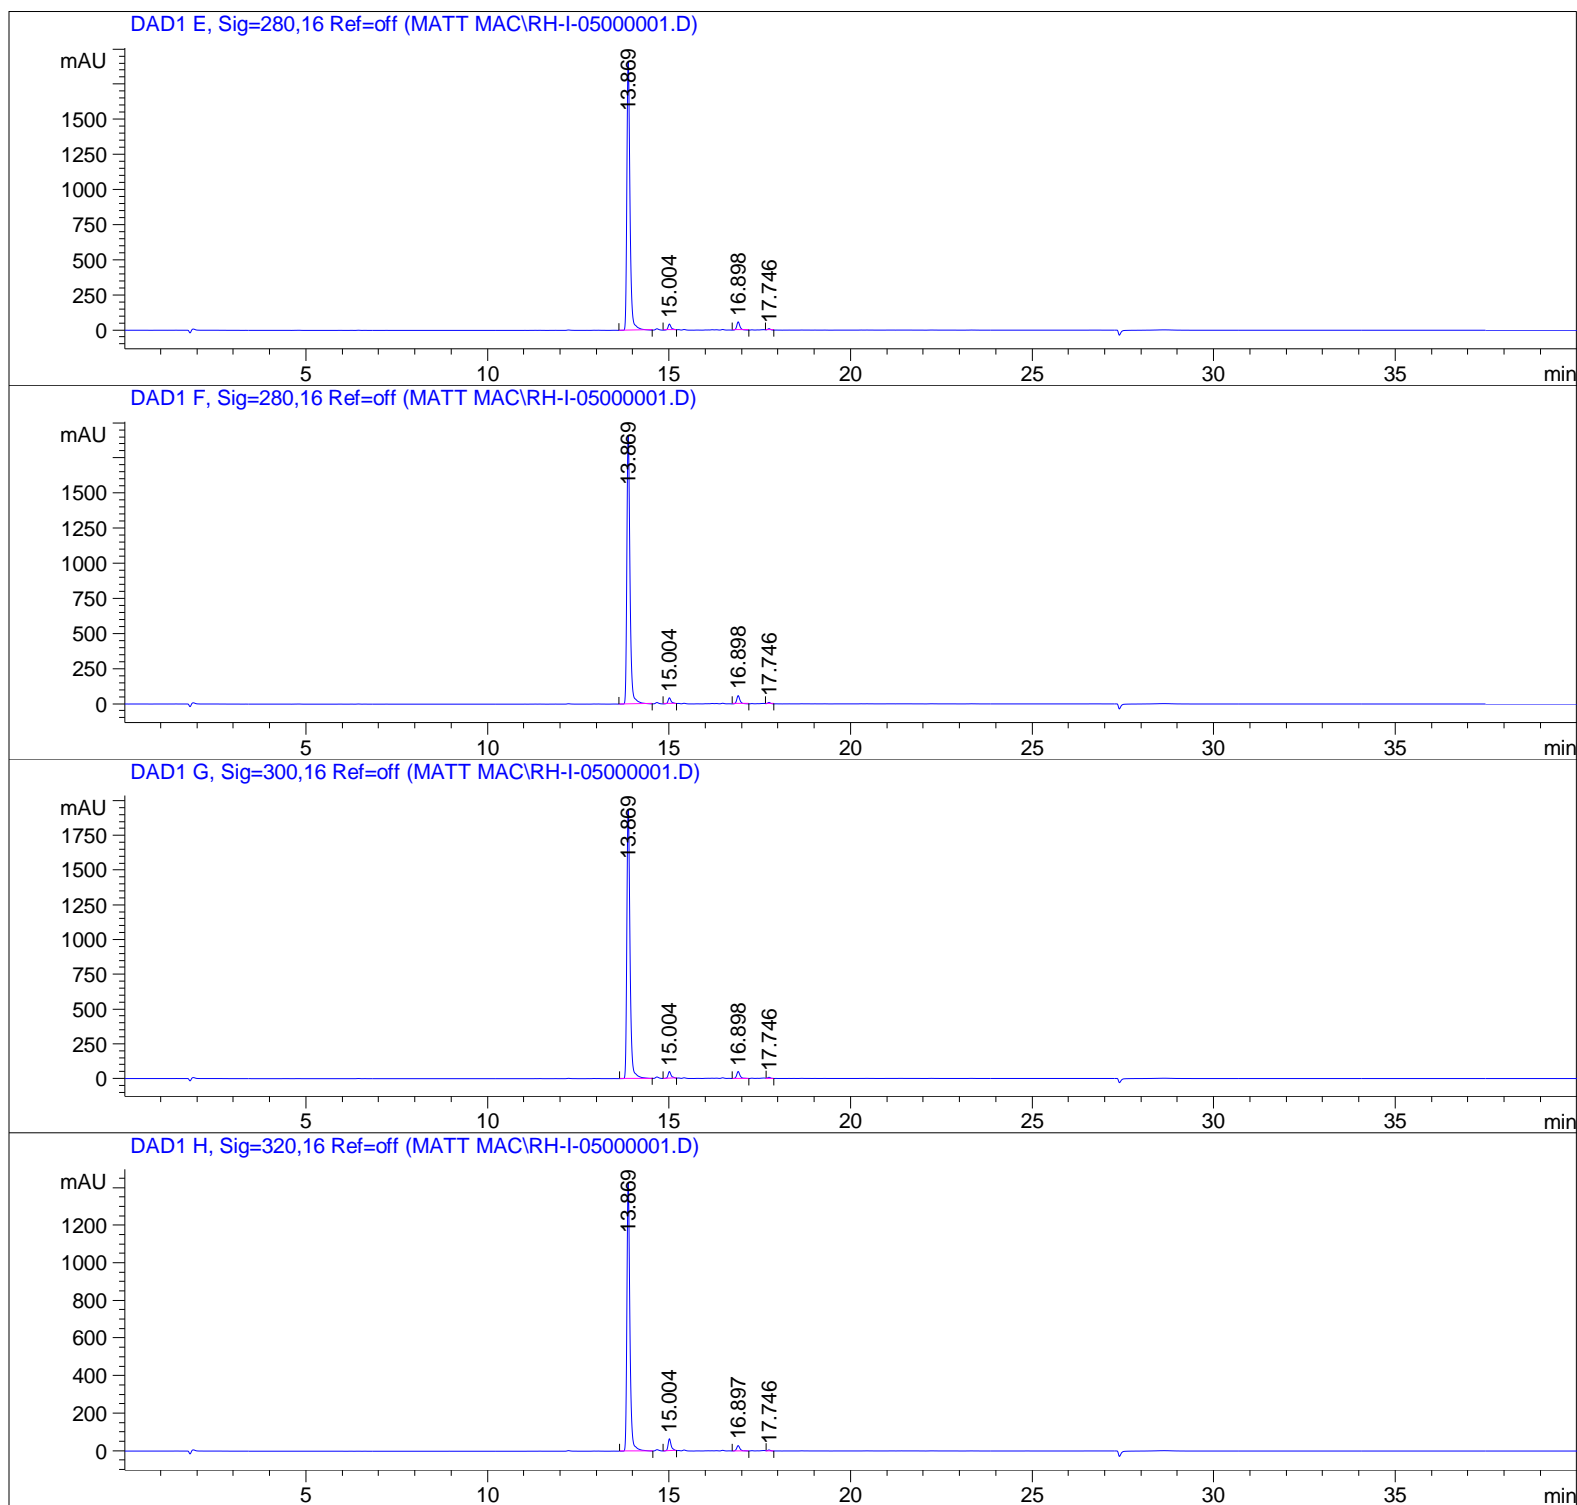=====  
Area Percent Report  
=====

Sorted By : Signal  
Multiplier : 1.0000  
Dilution : 1.0000  
Use Multiplier & Dilution Factor with ISTDs

### HPLC traces of compound 25

Signal 1: DAD1 A, Sig=254,4 Ref=off

| Peak # | RetTime [min] | Type | Width [min] | Area [mAU*s] | Height [mAU] | Area %  |
|--------|---------------|------|-------------|--------------|--------------|---------|
| 1      | 13.869        | BV   | 0.0999      | 1.47072e4    | 2260.91943   | 93.3598 |
| 2      | 15.004        | BV   | 0.0927      | 533.26215    | 85.62164     | 3.3851  |
| 3      | 16.897        | BB   | 0.0934      | 422.24030    | 67.12388     | 2.6803  |
| 4      | 17.747        | VB   | 0.0792      | 90.54961     | 17.25830     | 0.5748  |

Totals : 1.57532e4 2430.92325

Signal 2: DAD1 B, Sig=254,16 Ref=off

| Peak # | RetTime [min] | Type | Width [min] | Area [mAU*s] | Height [mAU] | Area %  |
|--------|---------------|------|-------------|--------------|--------------|---------|
| 1      | 13.869        | BV   | 0.0999      | 1.48180e4    | 2276.77466   | 93.4310 |
| 2      | 15.004        | BV   | 0.0925      | 527.65247    | 84.90611     | 3.3270  |
| 3      | 16.897        | BB   | 0.0934      | 423.42865    | 67.28013     | 2.6698  |
| 4      | 17.747        | VB   | 0.0792      | 90.75919     | 17.31082     | 0.5723  |

Totals : 1.58598e4 2446.27172

Signal 3: DAD1 C, Sig=210,8 Ref=off

| Peak # | RetTime [min] | Type | Width [min] | Area [mAU*s] | Height [mAU] | Area %  |
|--------|---------------|------|-------------|--------------|--------------|---------|
| 1      | 13.870        | BV   | 0.1375      | 1.91453e4    | 2200.73096   | 89.8328 |
| 2      | 15.004        | BV   | 0.0924      | 1104.12341   | 177.90869    | 5.1807  |
| 3      | 16.897        | BV   | 0.0923      | 923.61694    | 148.94827    | 4.3337  |
| 4      | 17.747        | VB   | 0.0799      | 139.10408    | 26.22550     | 0.6527  |

Totals : 2.13122e4 2553.81342

Signal 4: DAD1 D, Sig=230,16 Ref=off

| Peak # | RetTime [min] | Type | Width [min] | Area [mAU*s] | Height [mAU] | Area %  |
|--------|---------------|------|-------------|--------------|--------------|---------|
| 1      | 13.870        | BV   | 0.1274      | 1.90738e4    | 2383.21851   | 92.0747 |
| 2      | 15.004        | BV   | 0.0912      | 840.35529    | 137.73363    | 4.0566  |
| 3      | 16.897        | BB   | 0.0935      | 663.92902    | 105.42035    | 3.2050  |
| 4      | 17.747        | VB   | 0.0790      | 137.49413    | 26.29313     | 0.6637  |

Sample Name: run1

## HPLC traces of compound 25

Totals : 2.07156e4 2652.66561

Signal 5: DAD1 E, Sig=280,16 Ref=off

| Peak # | RetTime [min] | Type | Width [min] | Area [mAU*s] | Height [mAU] | Area %  |
|--------|---------------|------|-------------|--------------|--------------|---------|
| 1      | 13.869        | BV   | 0.0915      | 1.14248e4    | 1918.42883   | 94.3685 |
| 2      | 15.004        | BV   | 0.0925      | 267.09799    | 42.97807     | 2.2062  |
| 3      | 16.898        | BB   | 0.0918      | 361.20950    | 58.69957     | 2.9836  |
| 4      | 17.746        | VB   | 0.0793      | 53.48040     | 10.17261     | 0.4417  |

Totals : 1.21066e4 2030.27908

Signal 6: DAD1 F, Sig=280,16 Ref=off

| Peak # | RetTime [min] | Type | Width [min] | Area [mAU*s] | Height [mAU] | Area %  |
|--------|---------------|------|-------------|--------------|--------------|---------|
| 1      | 13.869        | BV   | 0.0915      | 1.14248e4    | 1918.42883   | 94.3685 |
| 2      | 15.004        | BV   | 0.0925      | 267.09799    | 42.97807     | 2.2062  |
| 3      | 16.898        | BB   | 0.0918      | 361.20950    | 58.69957     | 2.9836  |
| 4      | 17.746        | VB   | 0.0793      | 53.48040     | 10.17261     | 0.4417  |

Totals : 1.21066e4 2030.27908

Signal 7: DAD1 G, Sig=300,16 Ref=off

| Peak # | RetTime [min] | Type | Width [min] | Area [mAU*s] | Height [mAU] | Area %  |
|--------|---------------|------|-------------|--------------|--------------|---------|
| 1      | 13.869        | BV   | 0.0926      | 1.17744e4    | 1945.19104   | 94.6889 |
| 2      | 15.004        | BV   | 0.0924      | 307.58649    | 49.56367     | 2.4736  |
| 3      | 16.898        | BB   | 0.0924      | 309.97372    | 49.95343     | 2.4928  |
| 4      | 17.746        | VB   | 0.0794      | 42.87123     | 8.13978      | 0.3448  |

Totals : 1.24348e4 2052.84792

Signal 8: DAD1 H, Sig=320,16 Ref=off

| Peak # | RetTime [min] | Type | Width [min] | Area [mAU*s] | Height [mAU] | Area %  |
|--------|---------------|------|-------------|--------------|--------------|---------|
| 1      | 13.869        | BV   | 0.0868      | 8205.55176   | 1432.52271   | 93.2305 |
| 2      | 15.004        | BV   | 0.0903      | 388.63116    | 64.46502     | 4.4156  |



Sample Name: run1

HPLC traces of compound **25**

| Peak # | RetTime [min] | Type | Width [min] | Area [mAU*s] | Height [mAU] | Area % |
|--------|---------------|------|-------------|--------------|--------------|--------|
| 3      | 16.897        | BB   | 0.0936      | 179.76132    | 28.50370     | 2.0424 |
| 4      | 17.746        | VB   | 0.0795      | 27.41720     | 5.20166      | 0.3115 |

Totals :                                   8801.36144 1530.69308

=====  
\*\*\* End of Report \*\*\*

# HRMS of compound 25

C:\Xcalibur...\Matt2-10-2013\RH-I-05

2/10/2013 5:57:30 PM

RH-I-05

RH-I-05 #17 RT: 0.14 AV: 1 NL: 2.11E7

T: FTMS + p ESI Full ms [200.00-2000.00]

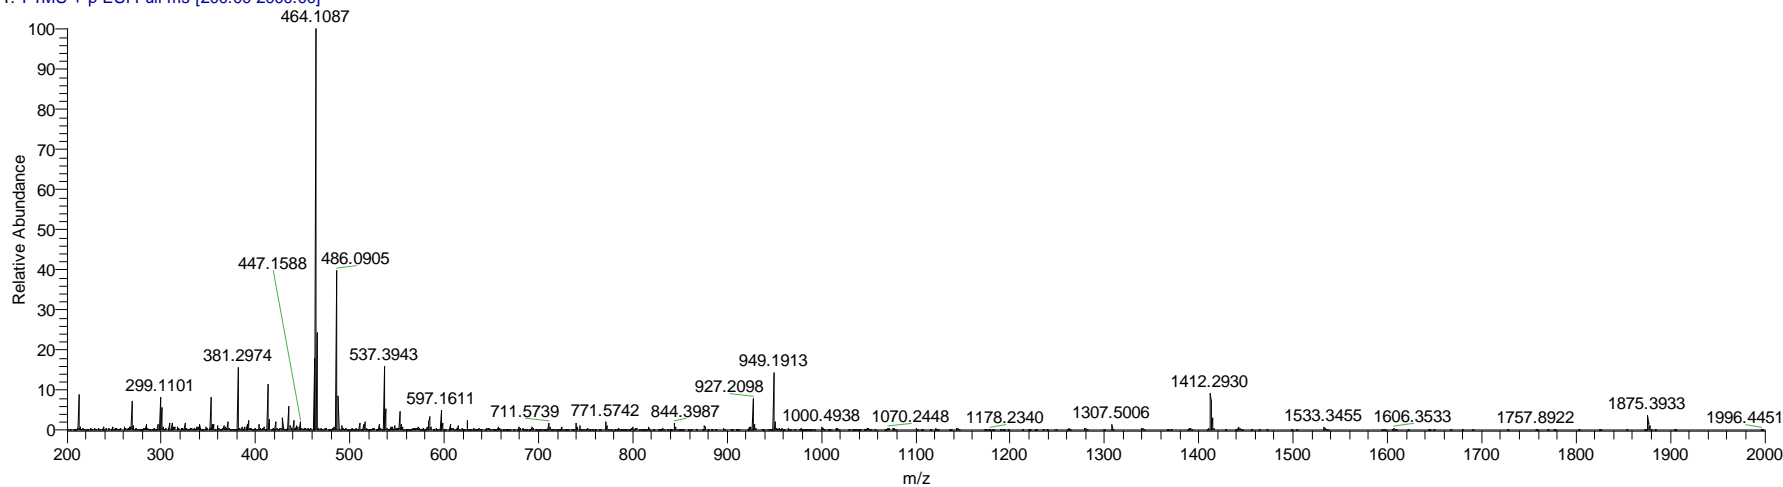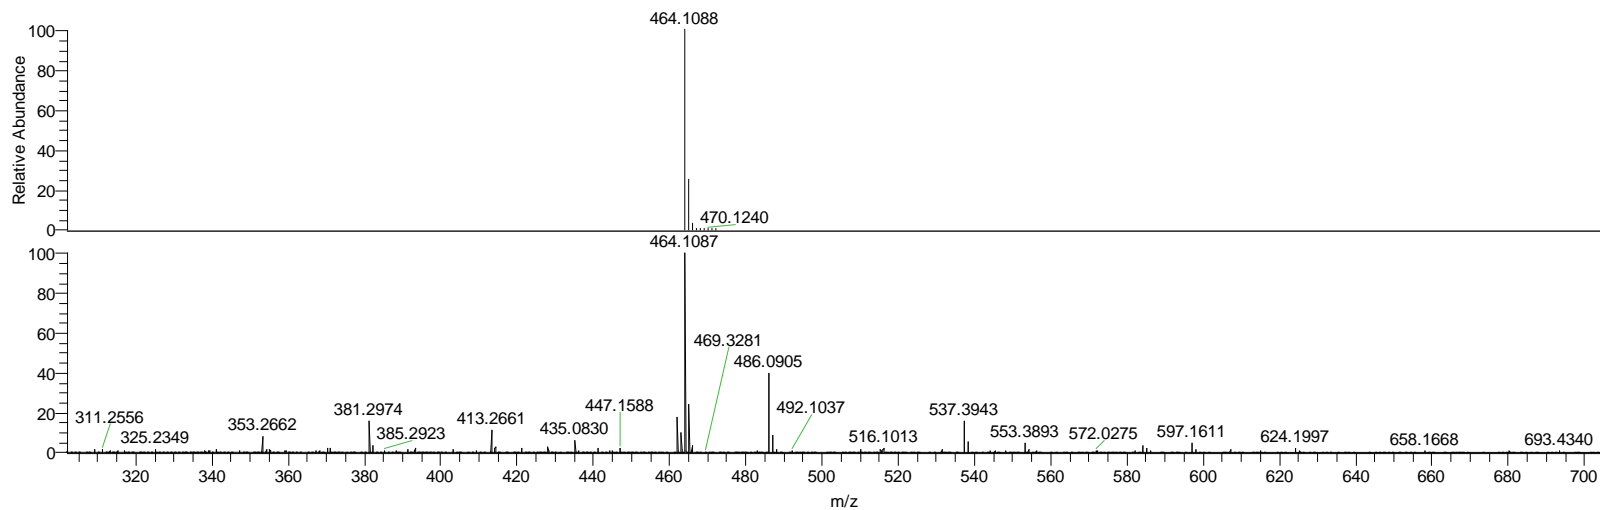

NL:  
7.56E5  
C<sub>23</sub>H<sub>18</sub>O<sub>8</sub>N<sub>3</sub>:  
C<sub>23</sub>H<sub>18</sub>O<sub>8</sub>N<sub>3</sub>  
pa Chrg 1

NL:  
2.11E7  
RH-I-05#17 RT:  
0.14 AV: 1 T:  
FTMS + p ESI  
Full ms  
[200.00-2000.00]

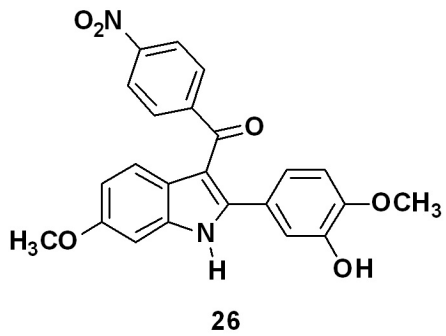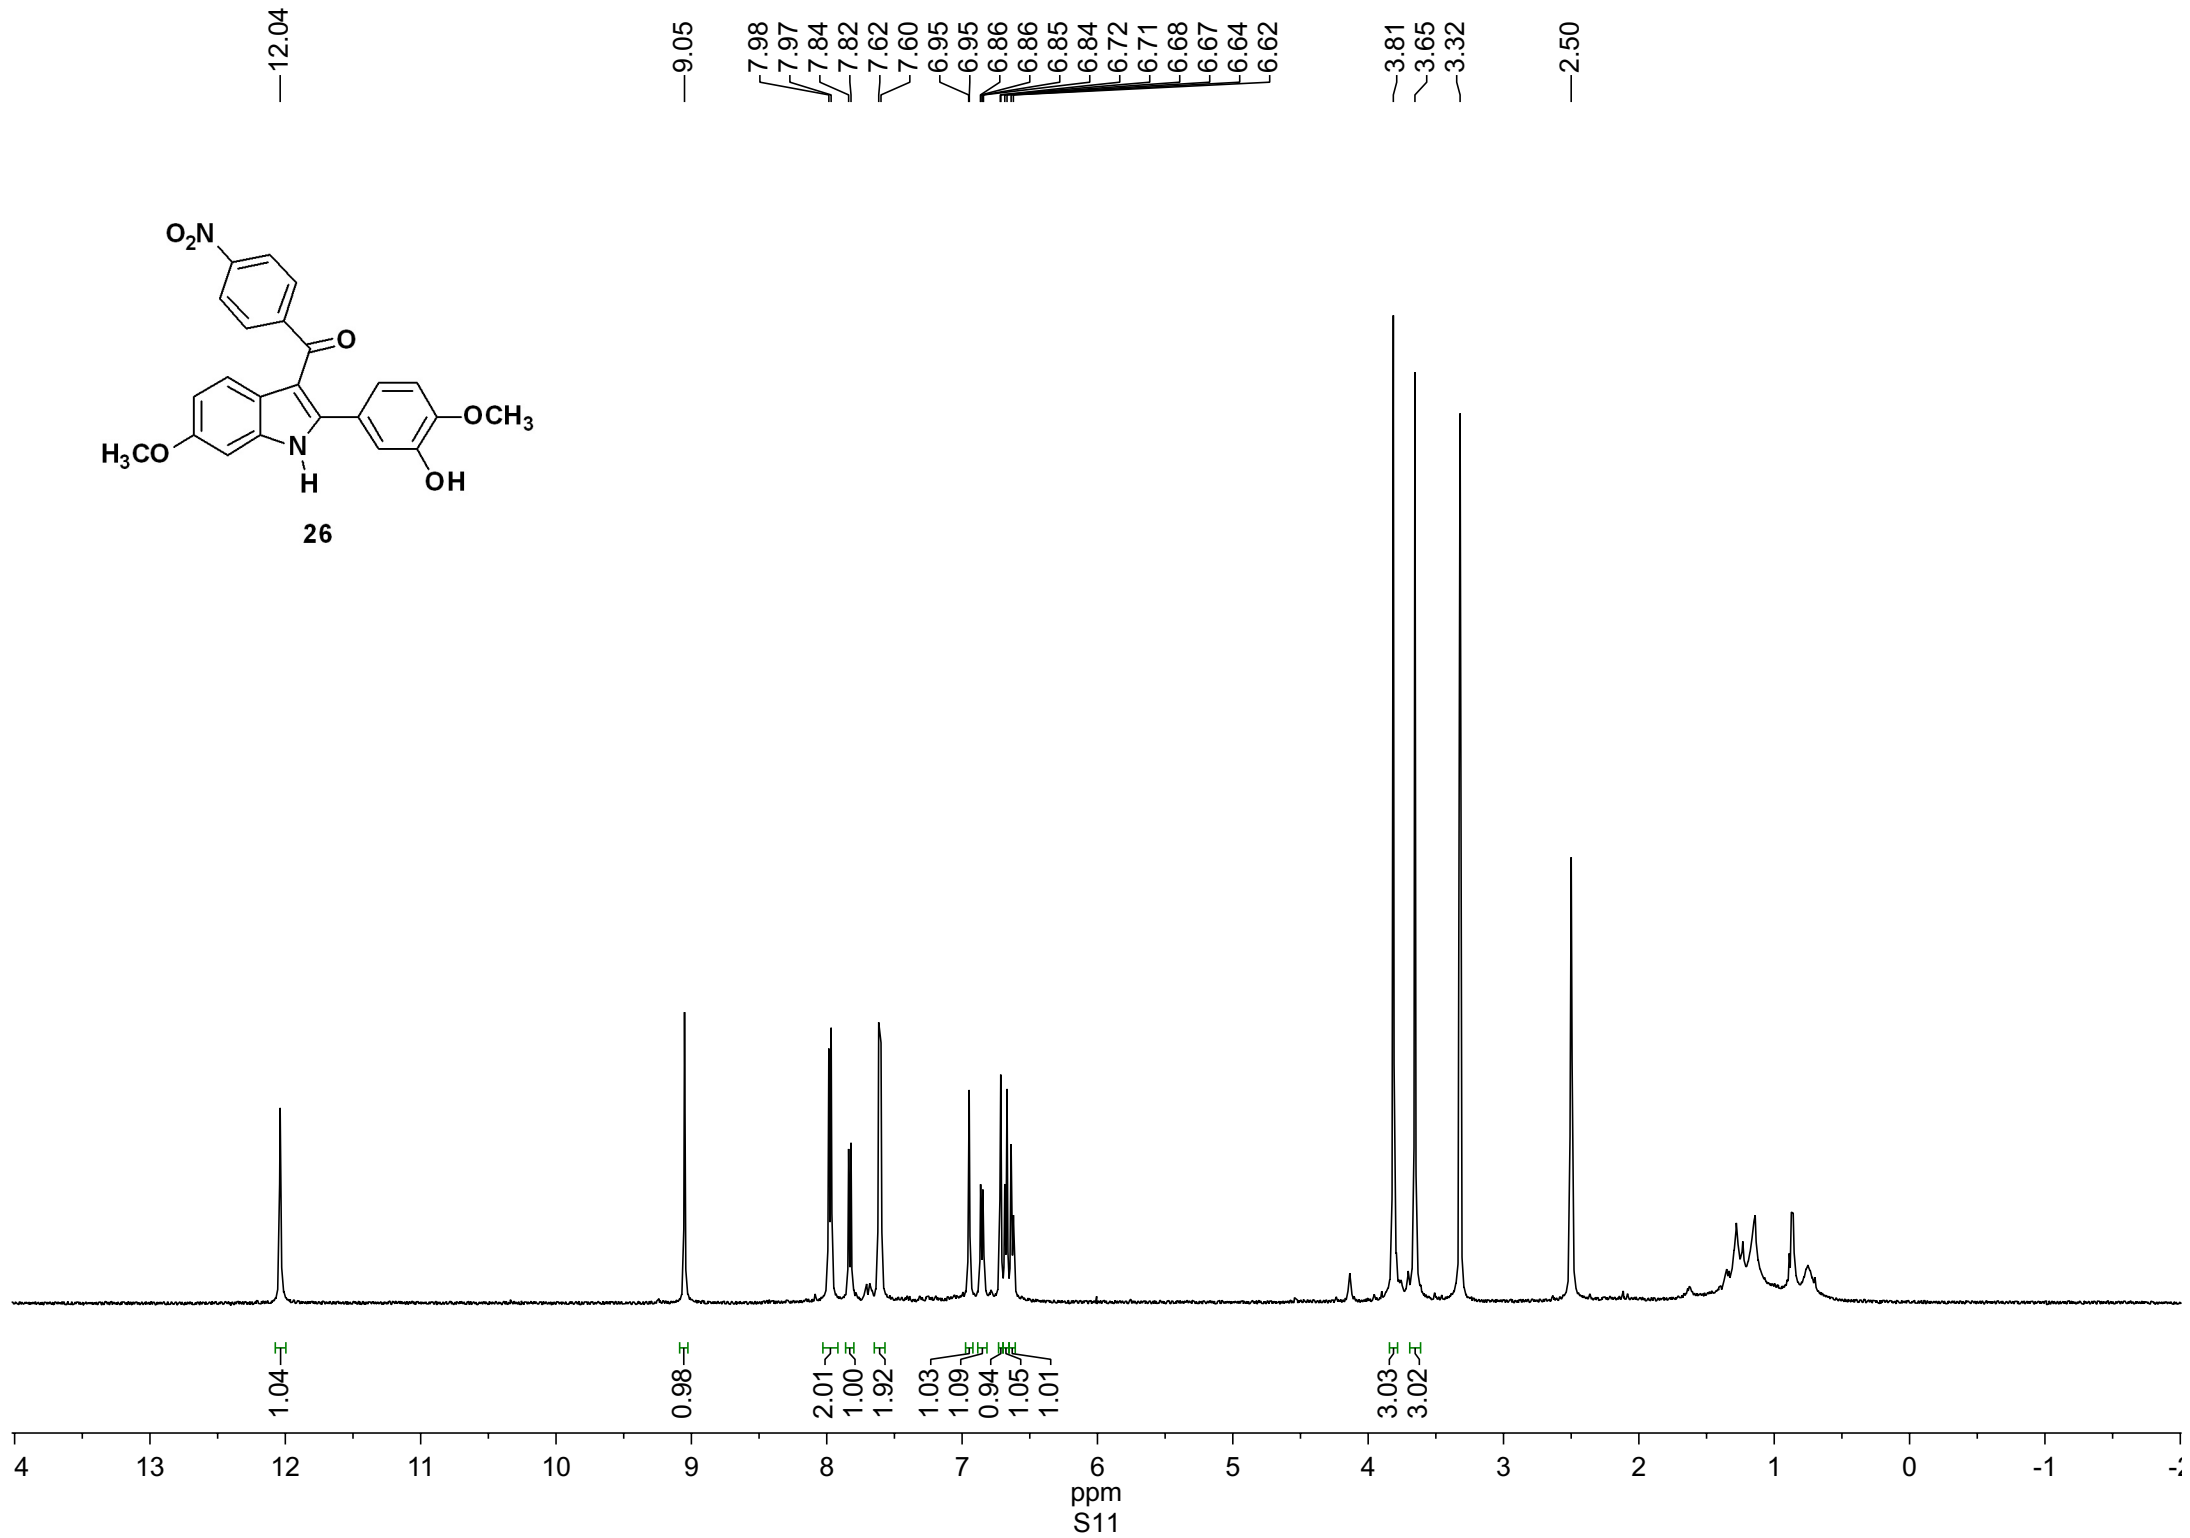

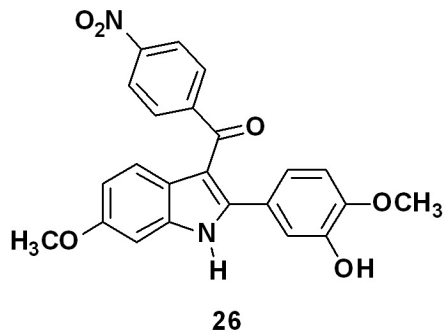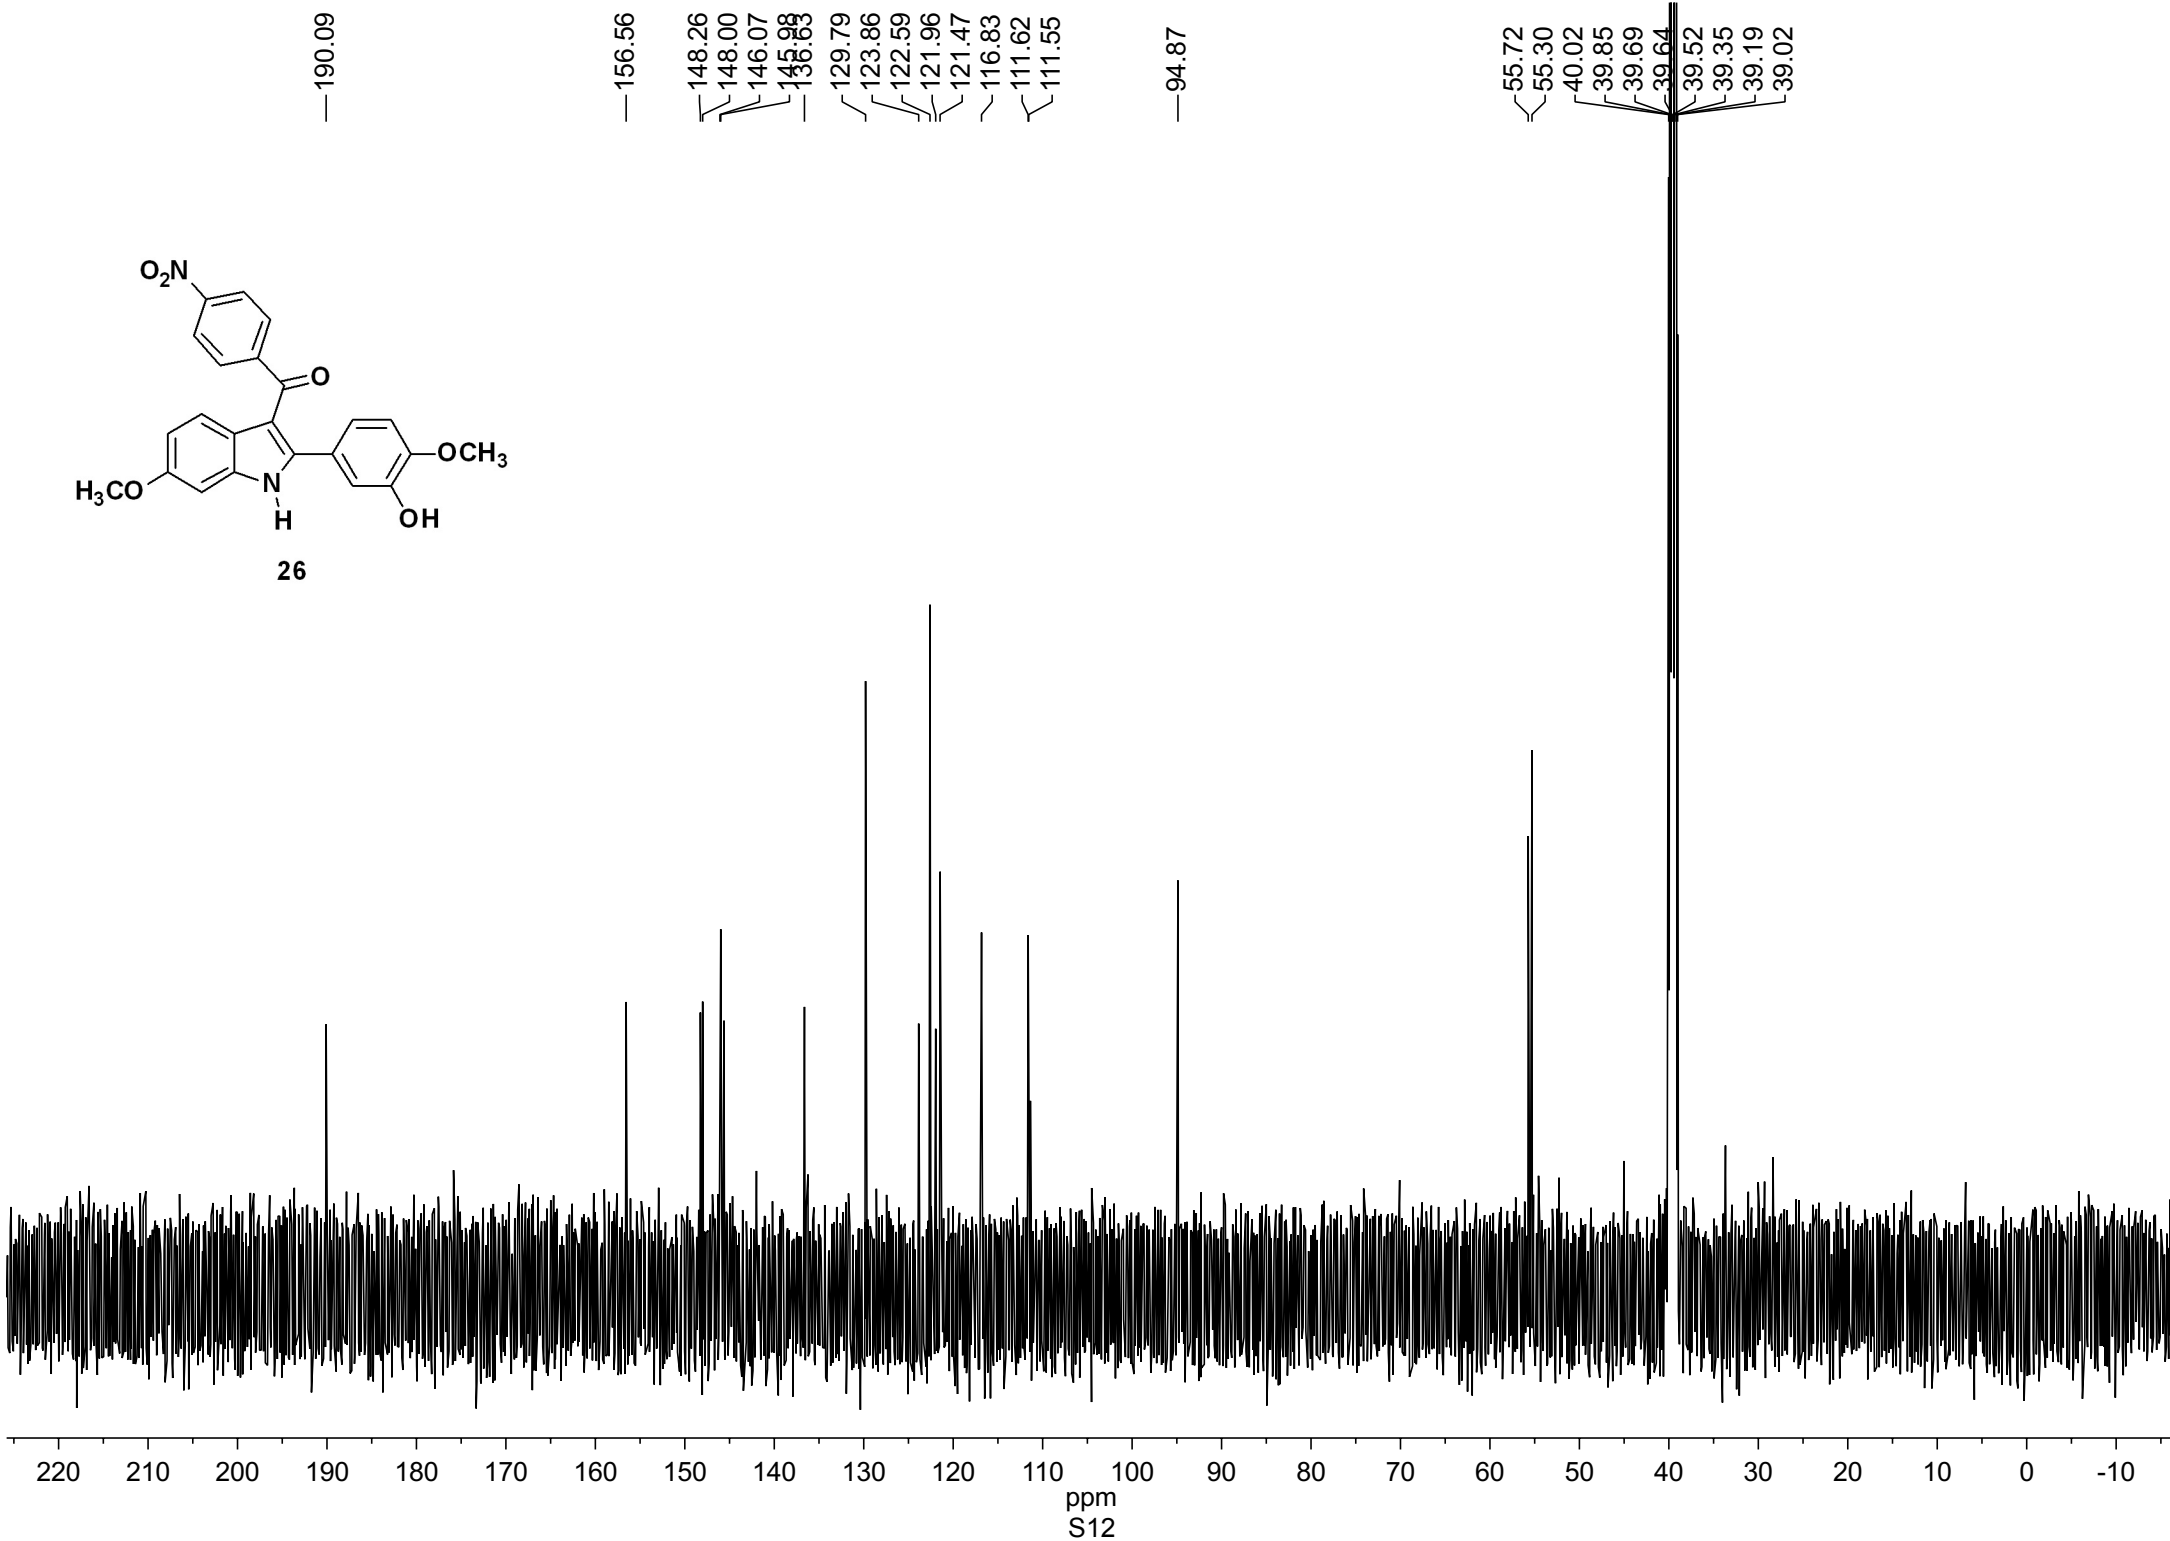

Sample Name: run1

## HPLC traces of compound 26

=====

Acq. Operator : Matt Mac  
Acq. Instrument : Instrument 1 Location : -  
Injection Date : 1/9/2013 7:50:53 PM  
Acq. Method : C:\CHEM32\1\METHODS\MASTERMETHOD.M  
Last changed : 1/9/2013 7:39:41 PM by Matt Mac  
Analysis Method : C:\CHEM32\1\METHODS\MASTERMETHOD.M  
Last changed : 1/9/2013 2:04:11 PM by Matt Mac  
(modified after loading)

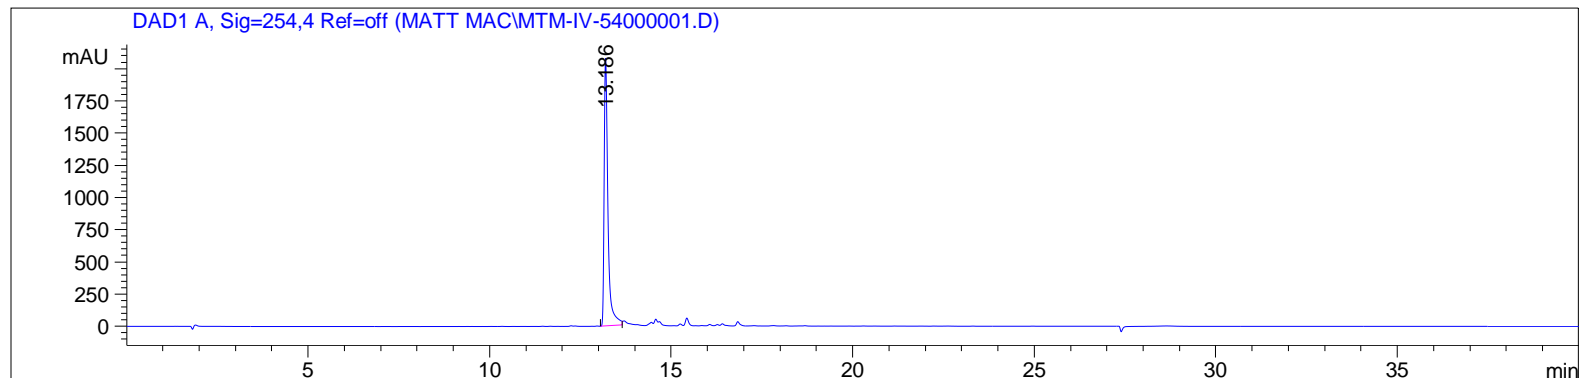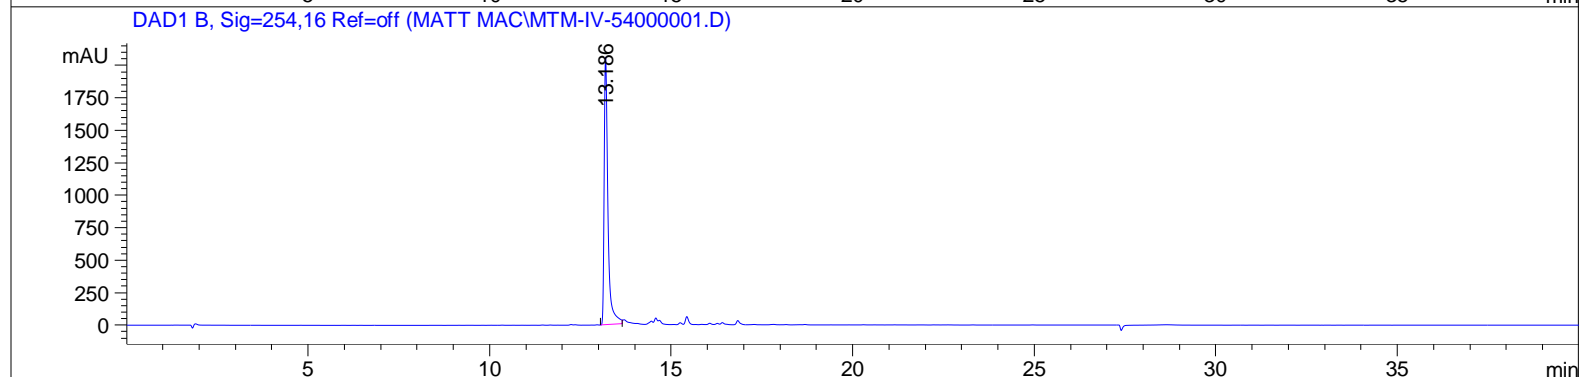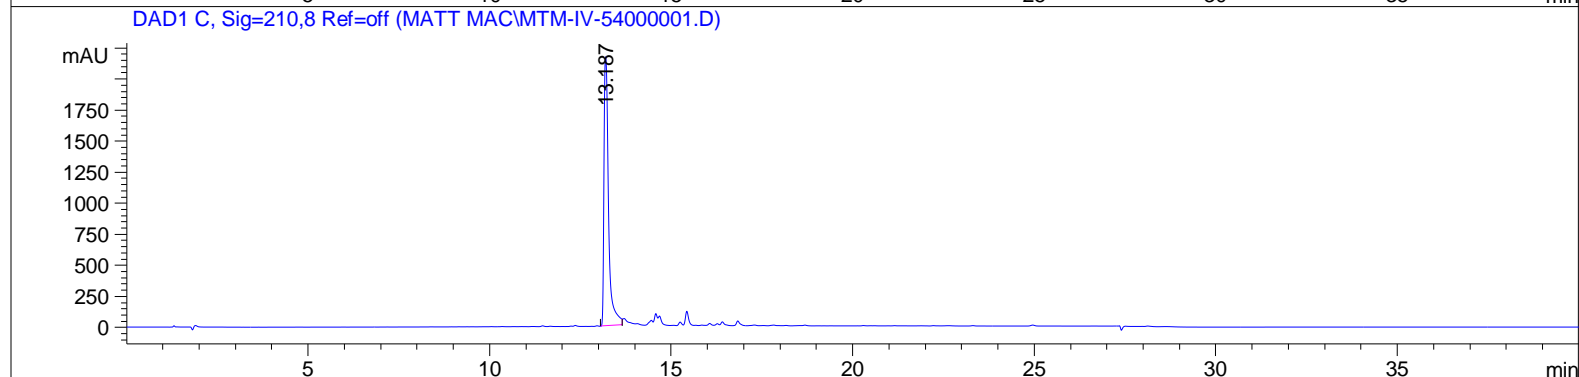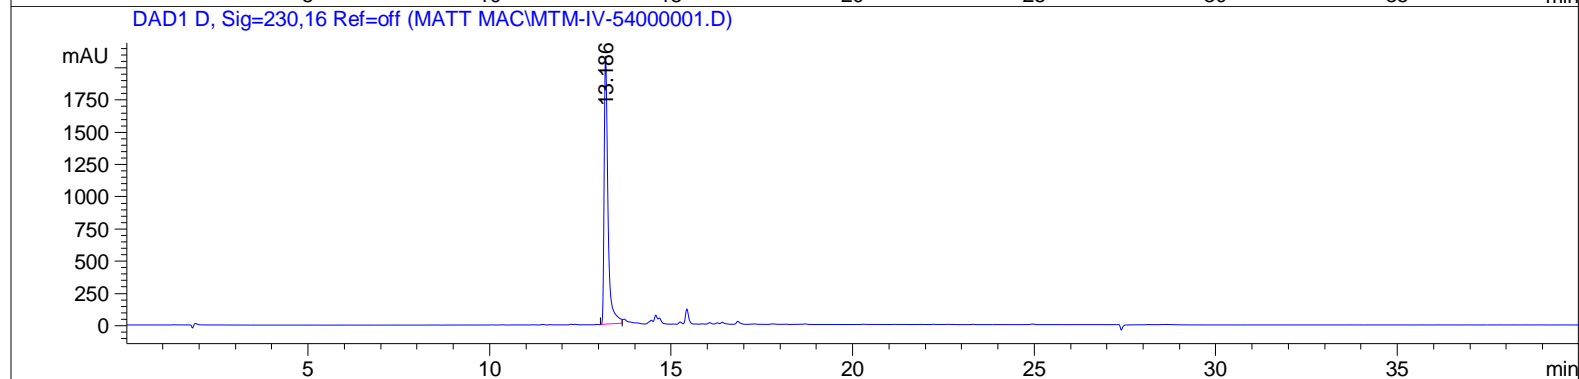

Sample Name: run1

## HPLC traces of compound 26

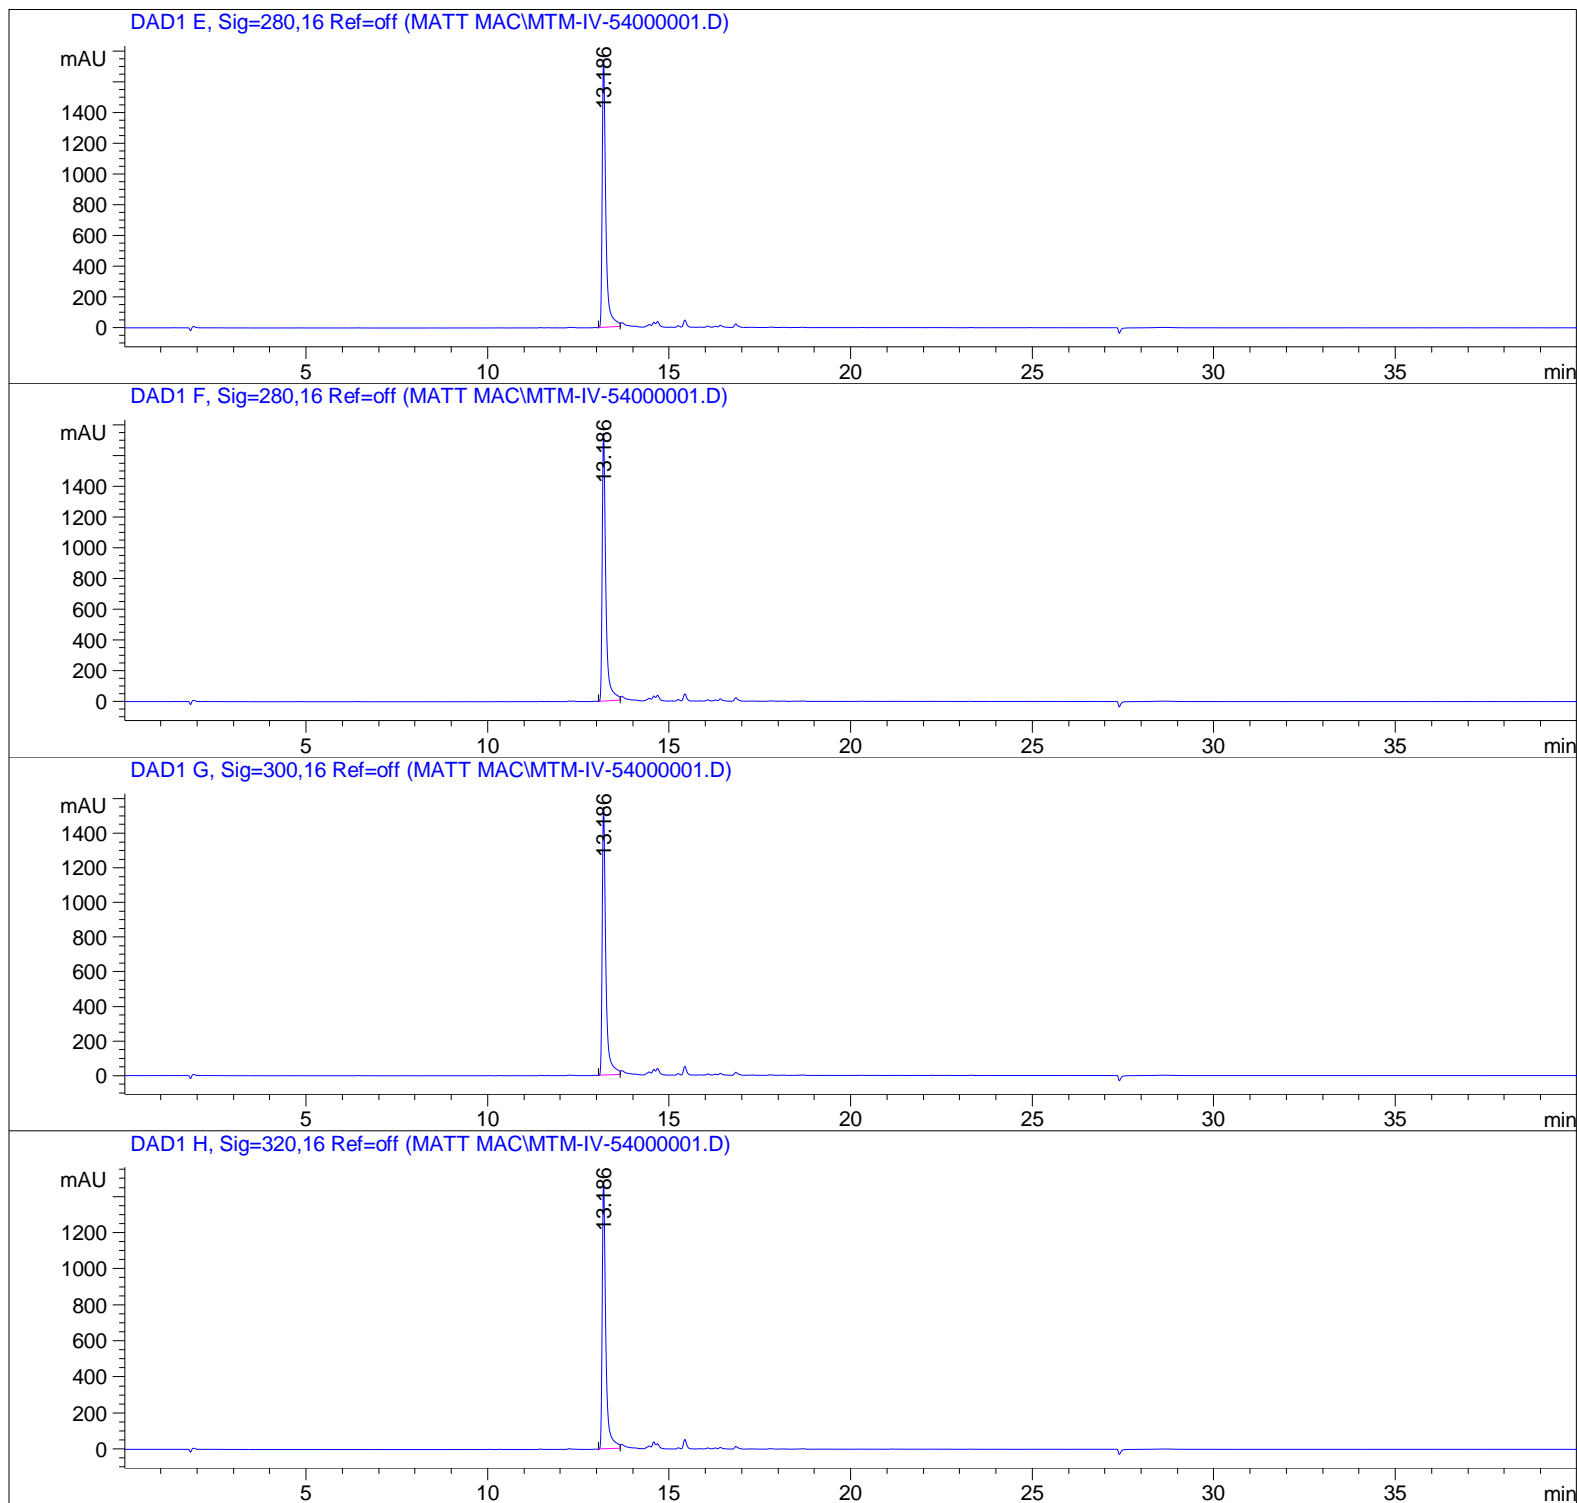=====  
Area Percent Report  
=====

Sorted By : Signal  
Multiplier : 1.0000  
Dilution : 1.0000  
Use Multiplier & Dilution Factor with ISTDs

Sample Name: run1

## HPLC traces of compound 26

Signal 1: DAD1 A, Sig=254,4 Ref=off

| Peak # | RetTime [min] | Type | Width [min] | Area [mAU*s] | Height [mAU] | Area %   |
|--------|---------------|------|-------------|--------------|--------------|----------|
| 1      | 13.186        | BV   | 0.1094      | 1.52234e4    | 2080.05469   | 100.0000 |

Totals : 1.52234e4 2080.05469

Signal 2: DAD1 B, Sig=254,16 Ref=off

| Peak # | RetTime [min] | Type | Width [min] | Area [mAU*s] | Height [mAU] | Area %   |
|--------|---------------|------|-------------|--------------|--------------|----------|
| 1      | 13.186        | BV   | 0.1089      | 1.50116e4    | 2063.30054   | 100.0000 |

Totals : 1.50116e4 2063.30054

Signal 3: DAD1 C, Sig=210,8 Ref=off

| Peak # | RetTime [min] | Type | Width [min] | Area [mAU*s] | Height [mAU] | Area %   |
|--------|---------------|------|-------------|--------------|--------------|----------|
| 1      | 13.187        | BV   | 0.1346      | 1.90632e4    | 2167.22290   | 100.0000 |

Totals : 1.90632e4 2167.22290

Signal 4: DAD1 D, Sig=230,16 Ref=off

| Peak # | RetTime [min] | Type | Width [min] | Area [mAU*s] | Height [mAU] | Area %   |
|--------|---------------|------|-------------|--------------|--------------|----------|
| 1      | 13.186        | BV   | 0.1104      | 1.54060e4    | 2079.89819   | 100.0000 |

Totals : 1.54060e4 2079.89819

Signal 5: DAD1 E, Sig=280,16 Ref=off

| Peak # | RetTime [min] | Type | Width [min] | Area [mAU*s] | Height [mAU] | Area %   |
|--------|---------------|------|-------------|--------------|--------------|----------|
| 1      | 13.186        | BV   | 0.1036      | 1.22133e4    | 1745.71863   | 100.0000 |

Totals : 1.22133e4 1745.71863

Sample Name: run1

## HPLC traces of compound 26

Signal 6: DAD1 F, Sig=280,16 Ref=off

| Peak # | RetTime [min] | Type | Width [min] | Area [mAU*s] | Height [mAU] | Area %   |
|--------|---------------|------|-------------|--------------|--------------|----------|
| 1      | 13.186        | BV   | 0.1036      | 1.22133e4    | 1745.71863   | 100.0000 |

Totals : 1.22133e4 1745.71863

Signal 7: DAD1 G, Sig=300,16 Ref=off

| Peak # | RetTime [min] | Type | Width [min] | Area [mAU*s] | Height [mAU] | Area %   |
|--------|---------------|------|-------------|--------------|--------------|----------|
| 1      | 13.186        | BV   | 0.1009      | 1.07514e4    | 1549.86780   | 100.0000 |

Totals : 1.07514e4 1549.86780

Signal 8: DAD1 H, Sig=320,16 Ref=off

| Peak # | RetTime [min] | Type | Width [min] | Area [mAU*s] | Height [mAU] | Area %   |
|--------|---------------|------|-------------|--------------|--------------|----------|
| 1      | 13.186        | BV   | 0.1004      | 1.02645e4    | 1488.61096   | 100.0000 |

Totals : 1.02645e4 1488.61096

=====  
\*\*\* End of Report \*\*\*



# HRMS of compound 26

C:\Xcalibur\...Matt\2-10-2013\MTM-IV-54

2/10/2013 4:33:04 PM

MTM-IV-54

MTM-IV-54 #20 RT: 0.20 AV: 1 NL: 2.49E6  
T: FTMS + p ESI Full ms [200.00-2000.00]

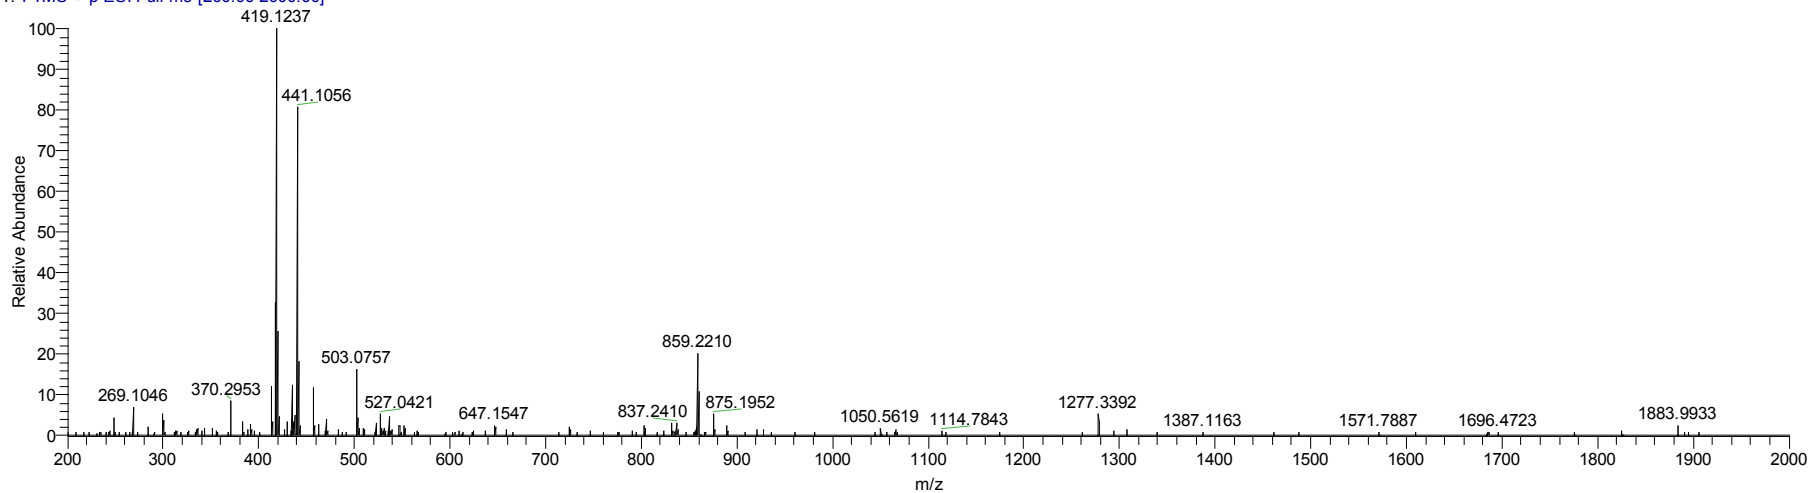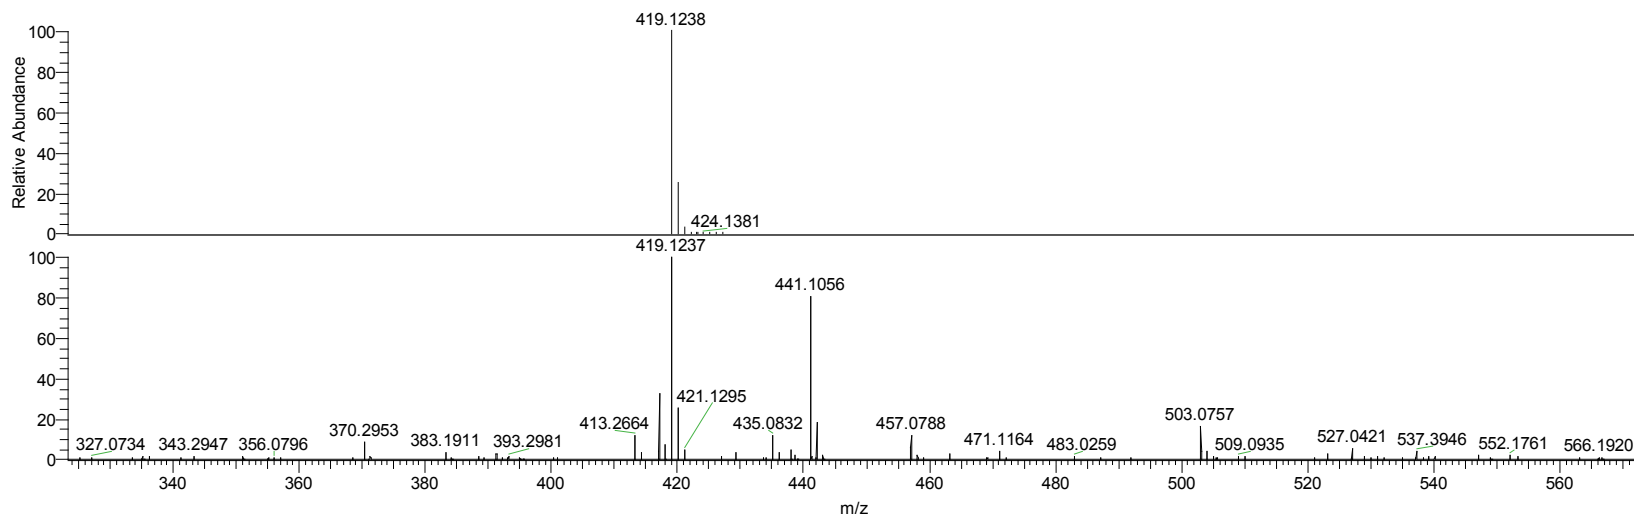

NL:  
7.62E5  
C<sub>23</sub>H<sub>19</sub>O<sub>6</sub>N<sub>2</sub>:  
C<sub>23</sub>H<sub>19</sub>O<sub>6</sub>N<sub>2</sub>:  
pa Chrg 1

NL:  
2.49E6  
MTM-IV-54#20  
RT: 0.20 AV: 1 T:  
FTMS + p ESI Full  
ms  
[200.00-2000.00]

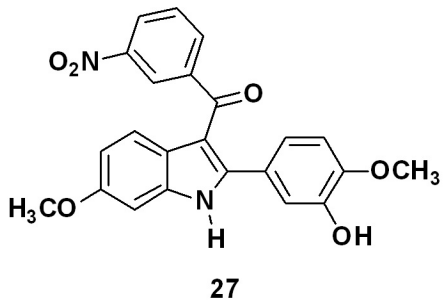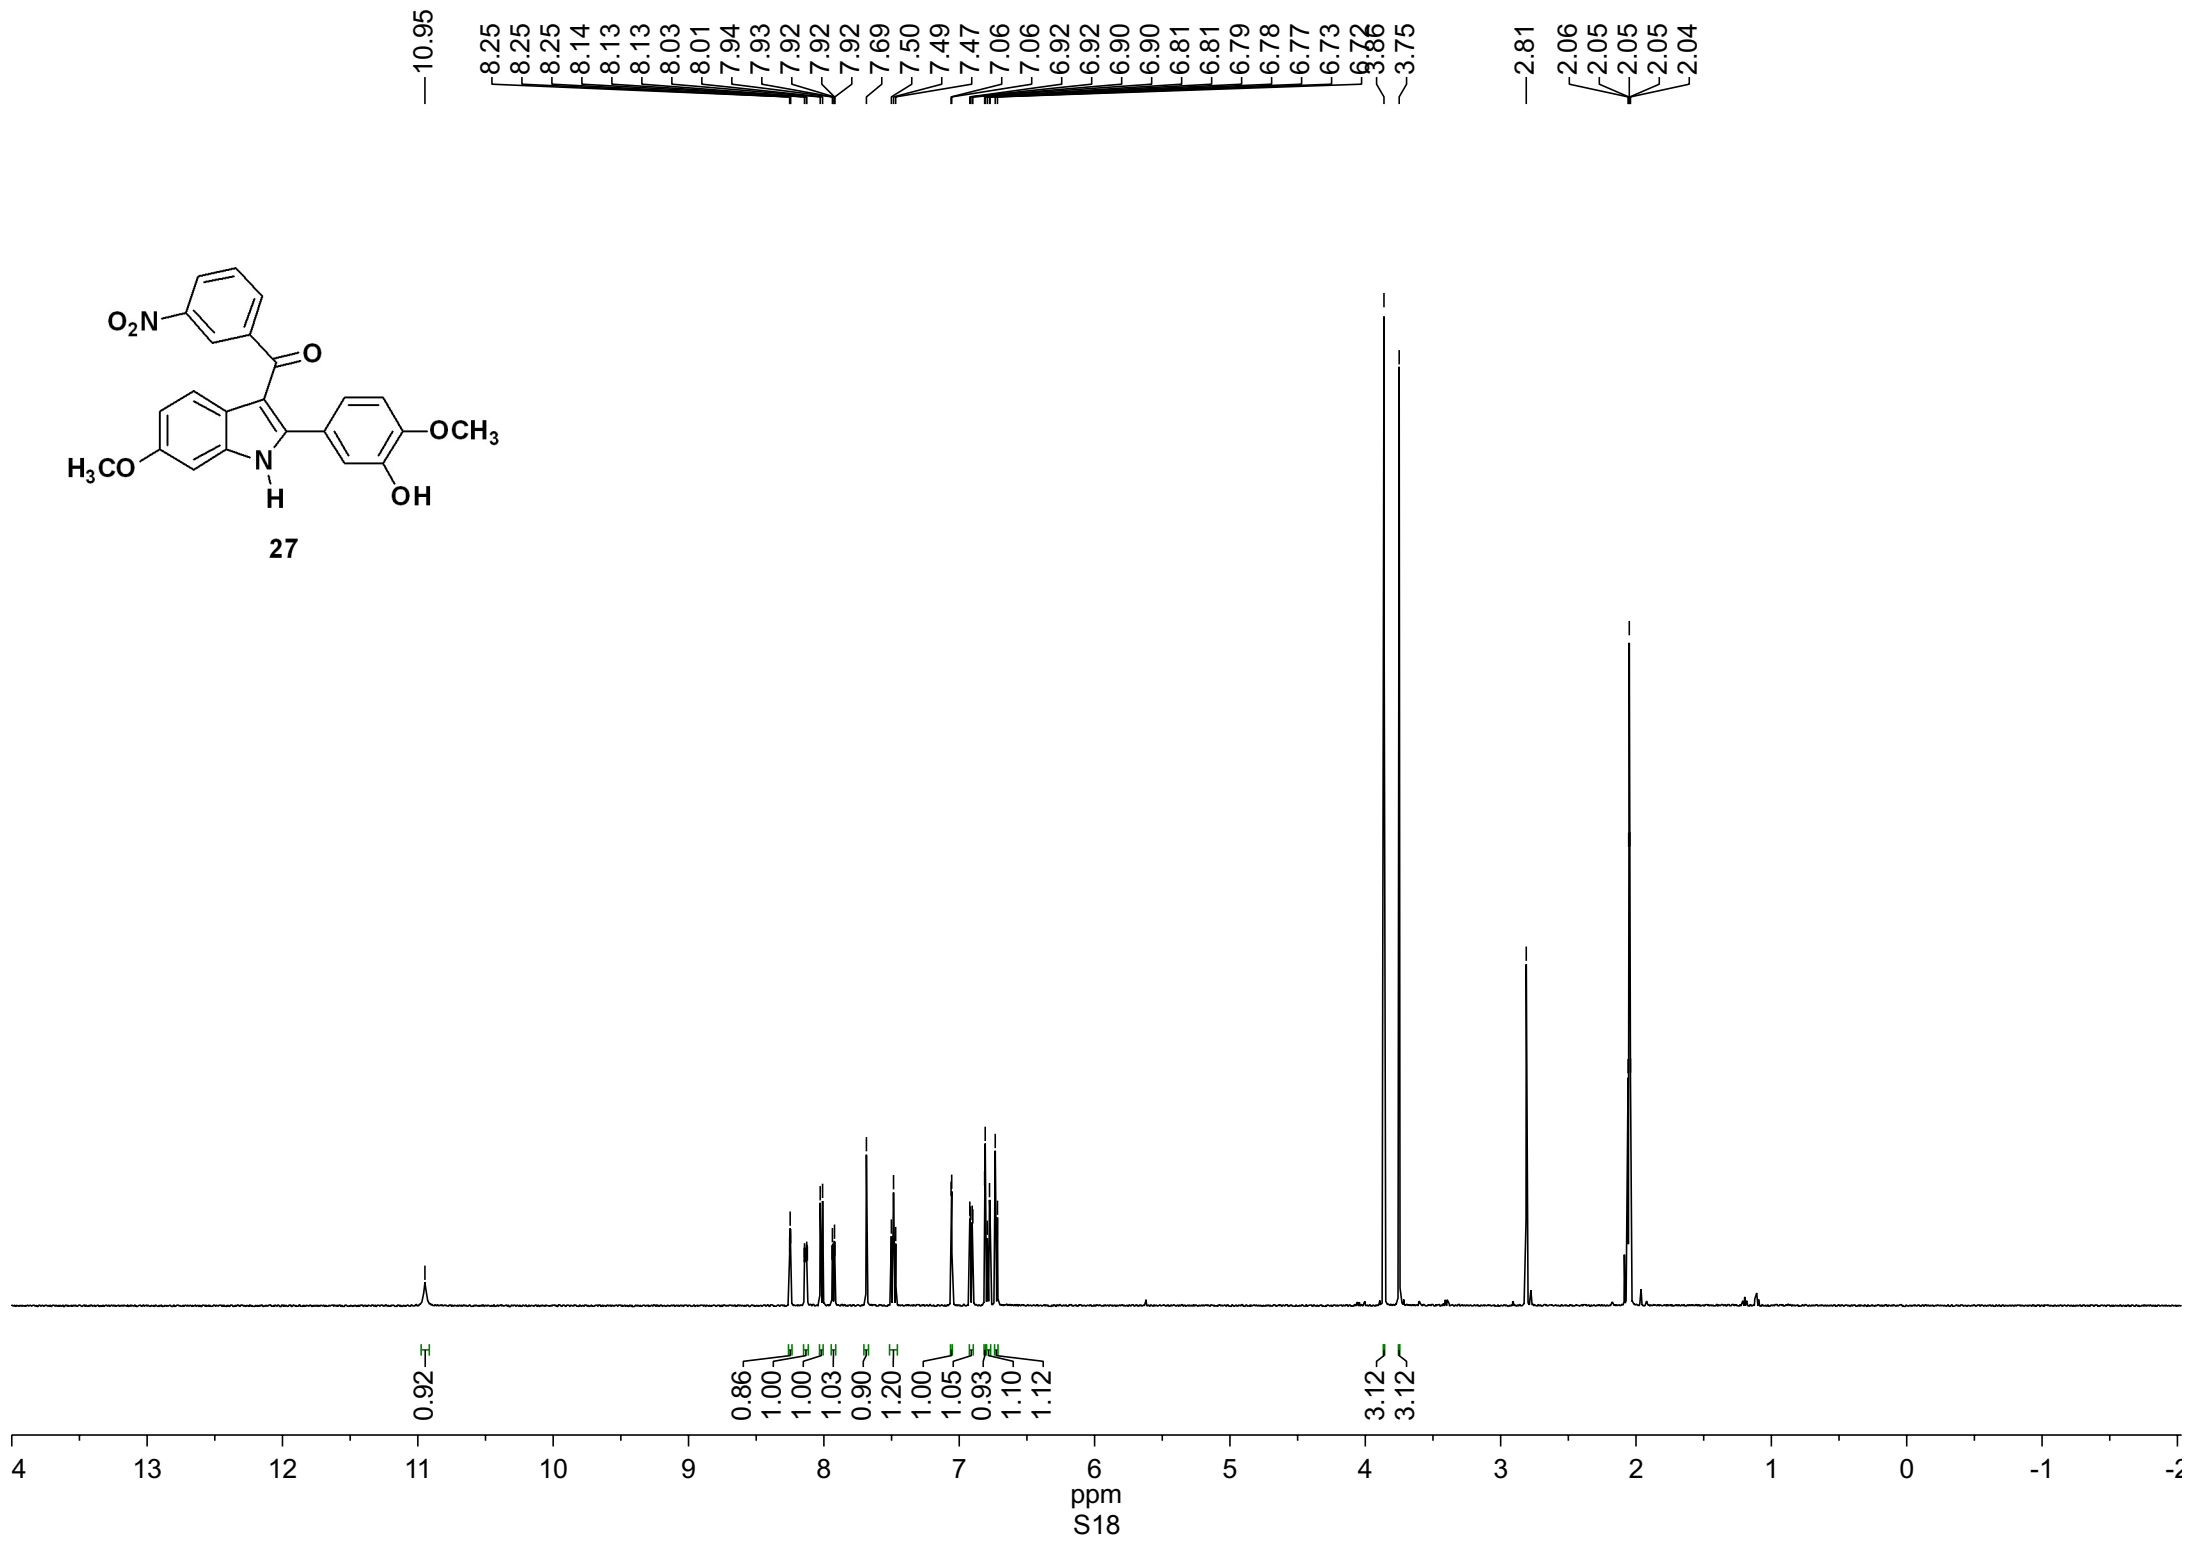

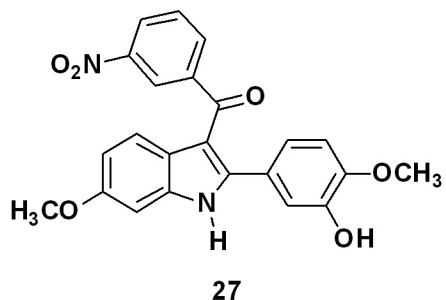

206.42  
206.27  
206.26  
206.25  
206.25  
206.10

190.51

158.52

149.15

147.40

145.95

143.10

138.04

135.88

130.11

125.82

125.69

124.84

123.73

123.04

122.91

117.53

113.02

112.73

112.25

95.75

56.48

55.97

30.46

30.31

30.15

30.00

29.84

29.69

29.54

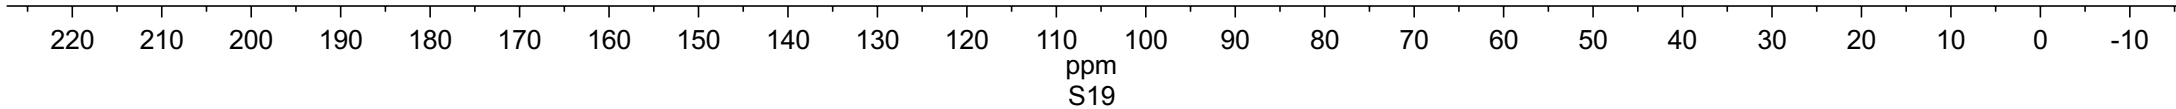

Sample Name: run1

## HPLC traces of compound 27

=====  
Acq. Operator : Matt Mac  
Acq. Instrument : Instrument 1 Location : -  
Injection Date : 1/8/2013 7:19:42 PM  
Acq. Method : C:\CHEM32\1\METHODS\MASTERMETHOD.M  
Last changed : 1/8/2013 7:13:43 PM by Matt Mac  
Analysis Method : C:\CHEM32\1\METHODS\MASTERMETHOD.M  
Last changed : 1/8/2013 8:58:30 AM by Matt Mac  
(modified after loading)

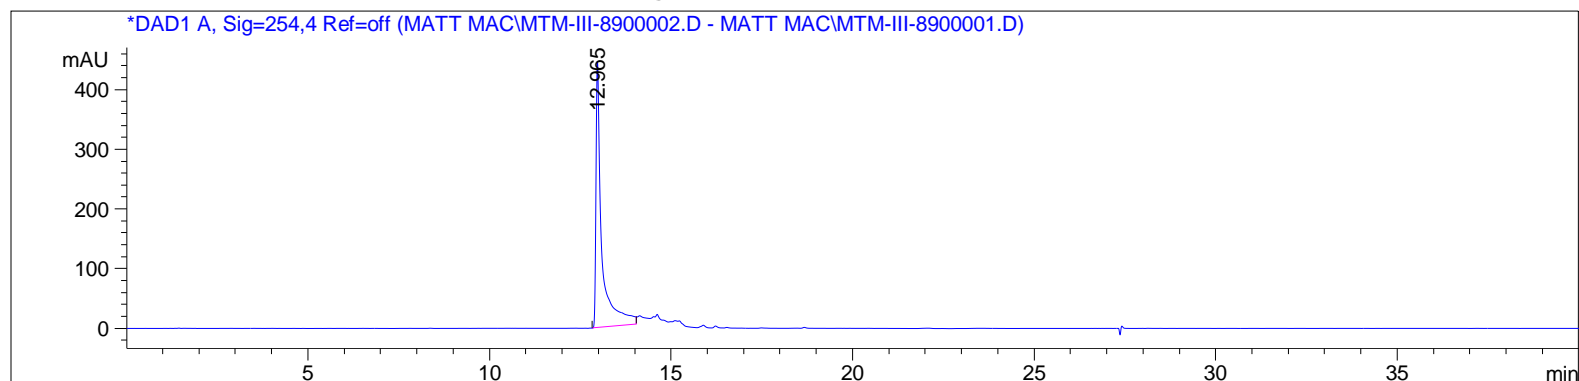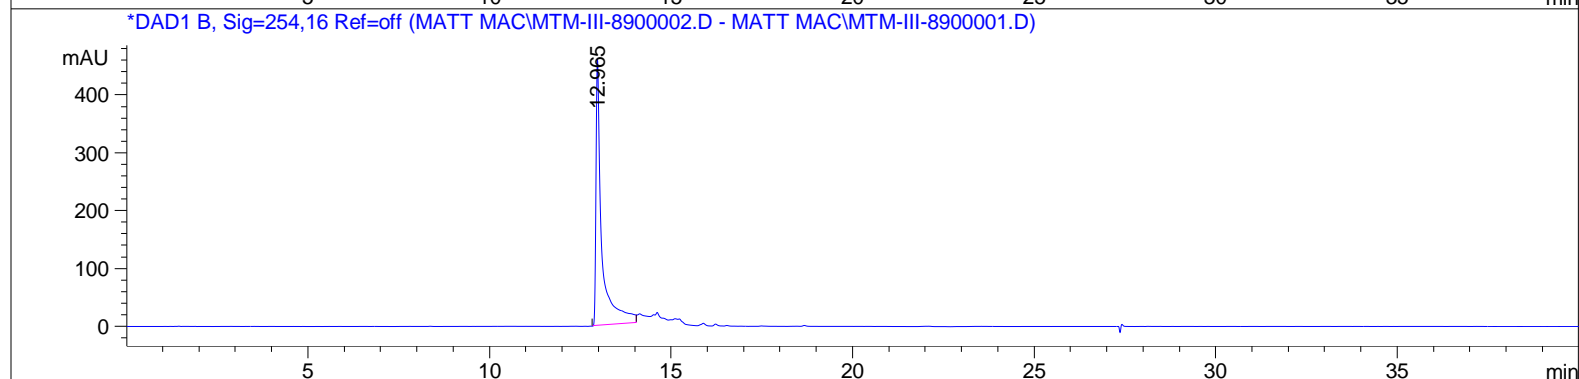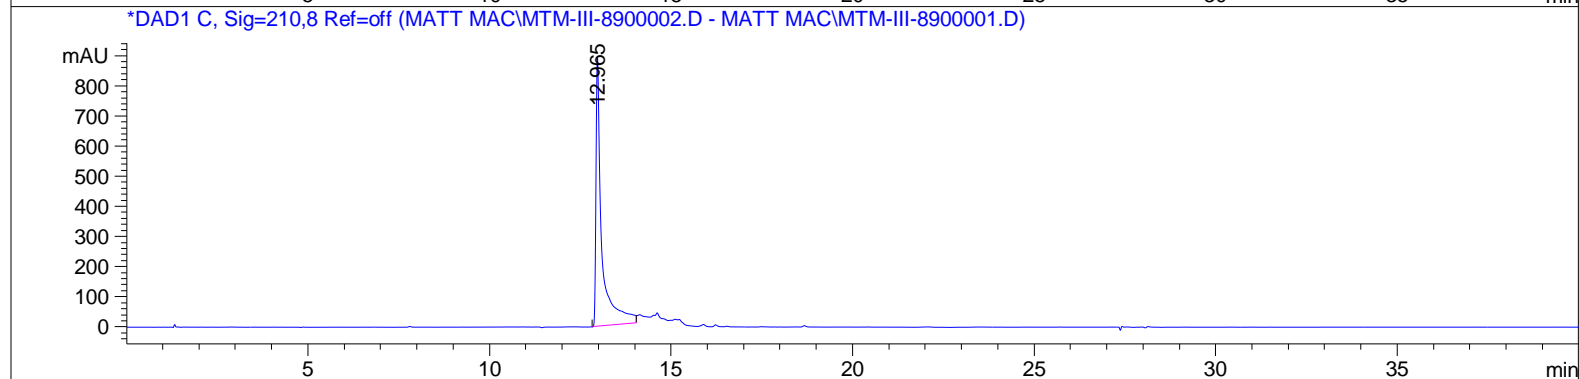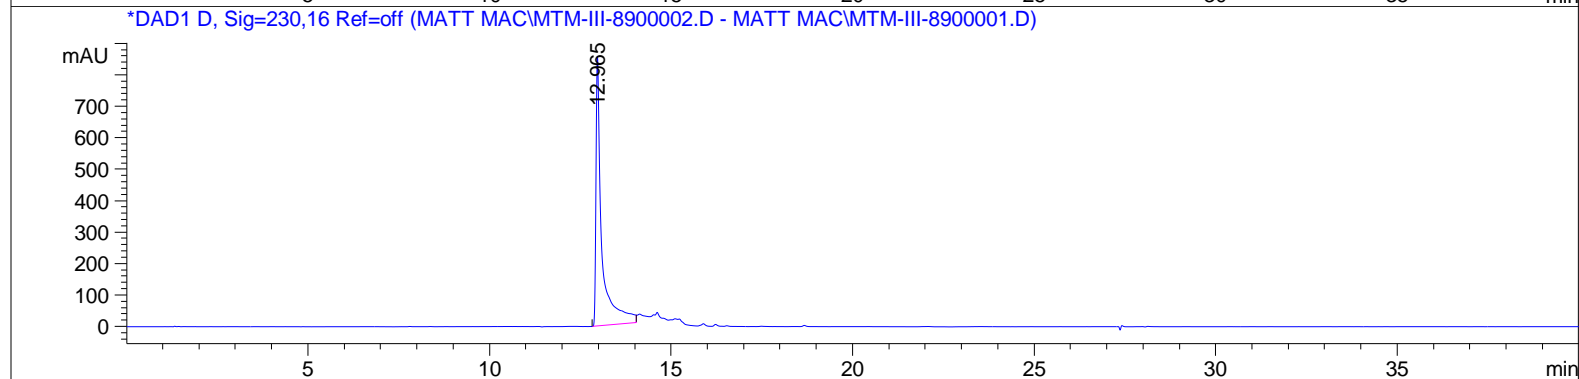

Sample Name: run1

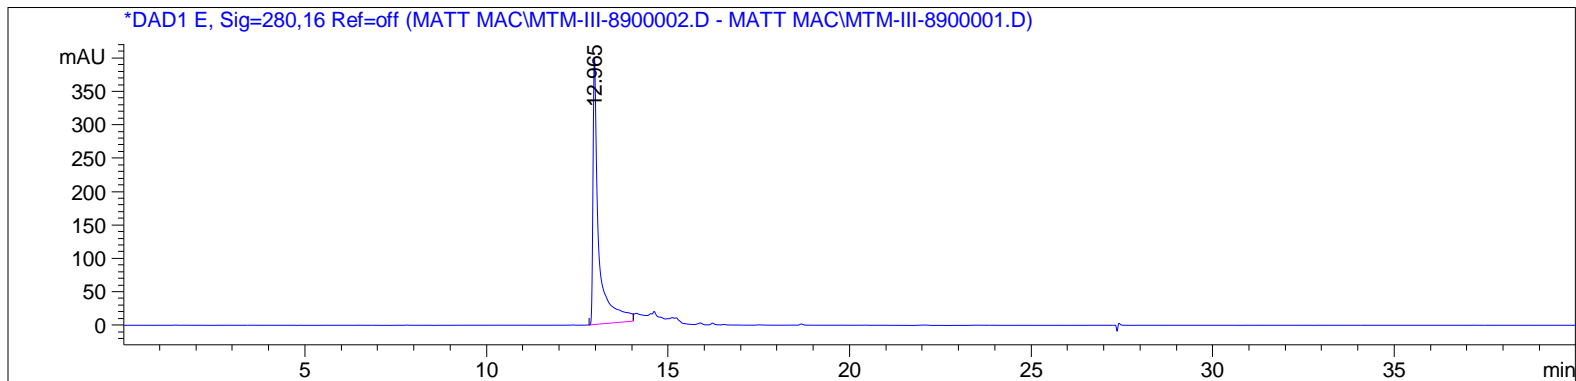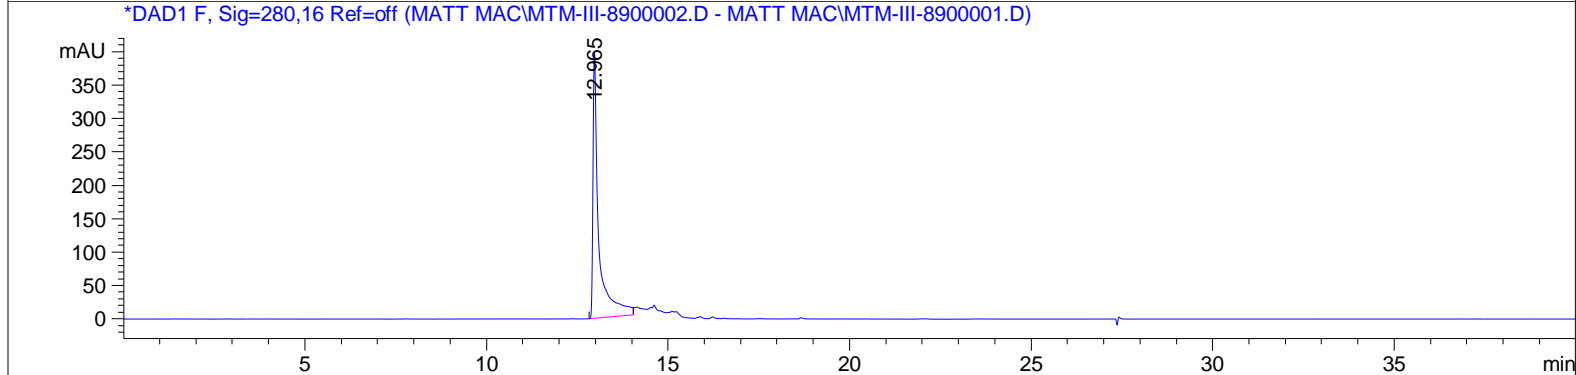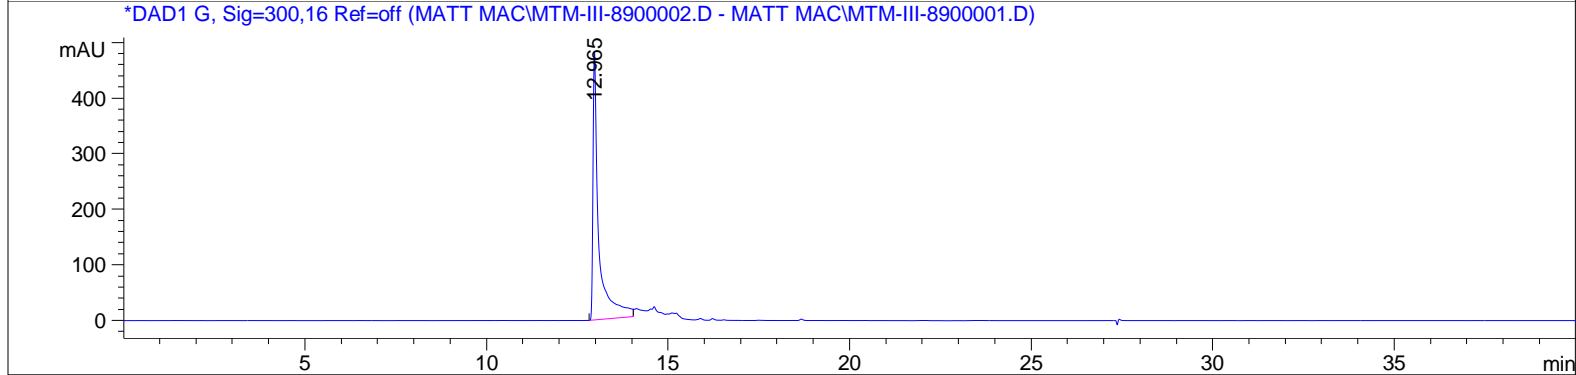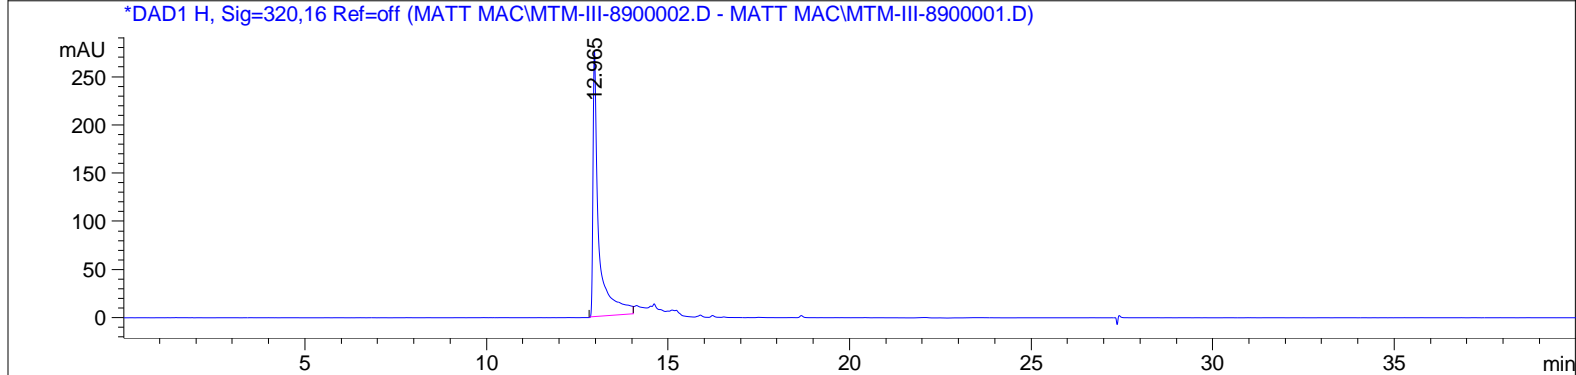

=====  
Area Percent Report  
=====

Sorted By : Signal  
Multiplier : 1.0000  
Dilution : 1.0000  
Use Multiplier & Dilution Factor with ISTDs

Sample Name: run1

## HPLC traces of compound 27

Signal 1: DAD1 A, Sig=254,4 Ref=off

Signal has been modified after loading from rawdata file!

| Peak # | RetTime [min] | Type | Width [min] | Area [mAU*s] | Height [mAU] | Area %   |
|--------|---------------|------|-------------|--------------|--------------|----------|
| 1      | 12.965        | BV   | 0.1527      | 5005.44141   | 446.85699    | 100.0000 |

Totals : 5005.44141 446.85699

Signal 2: DAD1 B, Sig=254,16 Ref=off

Signal has been modified after loading from rawdata file!

| Peak # | RetTime [min] | Type | Width [min] | Area [mAU*s] | Height [mAU] | Area %   |
|--------|---------------|------|-------------|--------------|--------------|----------|
| 1      | 12.965        | BV   | 0.1526      | 5166.09326   | 461.32089    | 100.0000 |

Totals : 5166.09326 461.32089

Signal 3: DAD1 C, Sig=210,8 Ref=off

Signal has been modified after loading from rawdata file!

| Peak # | RetTime [min] | Type | Width [min] | Area [mAU*s] | Height [mAU] | Area %   |
|--------|---------------|------|-------------|--------------|--------------|----------|
| 1      | 12.965        | BV   | 0.1532      | 1.00692e4    | 895.34930    | 100.0000 |

Totals : 1.00692e4 895.34930

Signal 4: DAD1 D, Sig=230,16 Ref=off

Signal has been modified after loading from rawdata file!

| Peak # | RetTime [min] | Type | Width [min] | Area [mAU*s] | Height [mAU] | Area %   |
|--------|---------------|------|-------------|--------------|--------------|----------|
| 1      | 12.965        | BV   | 0.1531      | 9635.51758   | 857.25806    | 100.0000 |

Totals : 9635.51758 857.25806

Sample Name: run1

## HPLC traces of compound 27

Signal 5: DAD1 E, Sig=280,16 Ref=off

Signal has been modified after loading from rawdata file!

| Peak # | RetTime [min] | Type | Width [min] | Area [mAU*s] | Height [mAU] | Area %   |
|--------|---------------|------|-------------|--------------|--------------|----------|
| 1      | 12.965        | BV   | 0.1523      | 4463.91895   | 399.77322    | 100.0000 |

Totals :                                   4463.91895   399.77322

Signal 6: DAD1 F, Sig=280,16 Ref=off

Signal has been modified after loading from rawdata file!

| Peak # | RetTime [min] | Type | Width [min] | Area [mAU*s] | Height [mAU] | Area %   |
|--------|---------------|------|-------------|--------------|--------------|----------|
| 1      | 12.965        | BV   | 0.1523      | 4463.91895   | 399.77322    | 100.0000 |

Totals :                                   4463.91895   399.77322

Signal 7: DAD1 G, Sig=300,16 Ref=off

Signal has been modified after loading from rawdata file!

| Peak # | RetTime [min] | Type | Width [min] | Area [mAU*s] | Height [mAU] | Area %   |
|--------|---------------|------|-------------|--------------|--------------|----------|
| 1      | 12.965        | BV   | 0.1524      | 5404.95215   | 483.64343    | 100.0000 |

Totals :                                   5404.95215   483.64343

Signal 8: DAD1 H, Sig=320,16 Ref=off

Signal has been modified after loading from rawdata file!

| Peak # | RetTime [min] | Type | Width [min] | Area [mAU*s] | Height [mAU] | Area %   |
|--------|---------------|------|-------------|--------------|--------------|----------|
| 1      | 12.965        | BV   | 0.1526      | 3091.80371   | 276.23389    | 100.0000 |

Totals :                                   3091.80371   276.23389

=====  
\*\*\* End of Report \*\*\*

# HPLC traces of compound 27

C:\Xcalibur...12-10-2013\MTM-III-89

2/10/2013 6:58:21 PM

MTM-III-89

MTM-III-89 #20 RT: 0.19 AV: 1 NL: 8.65E6  
T: FTMS + p ESI Full ms [200.00-2000.00]

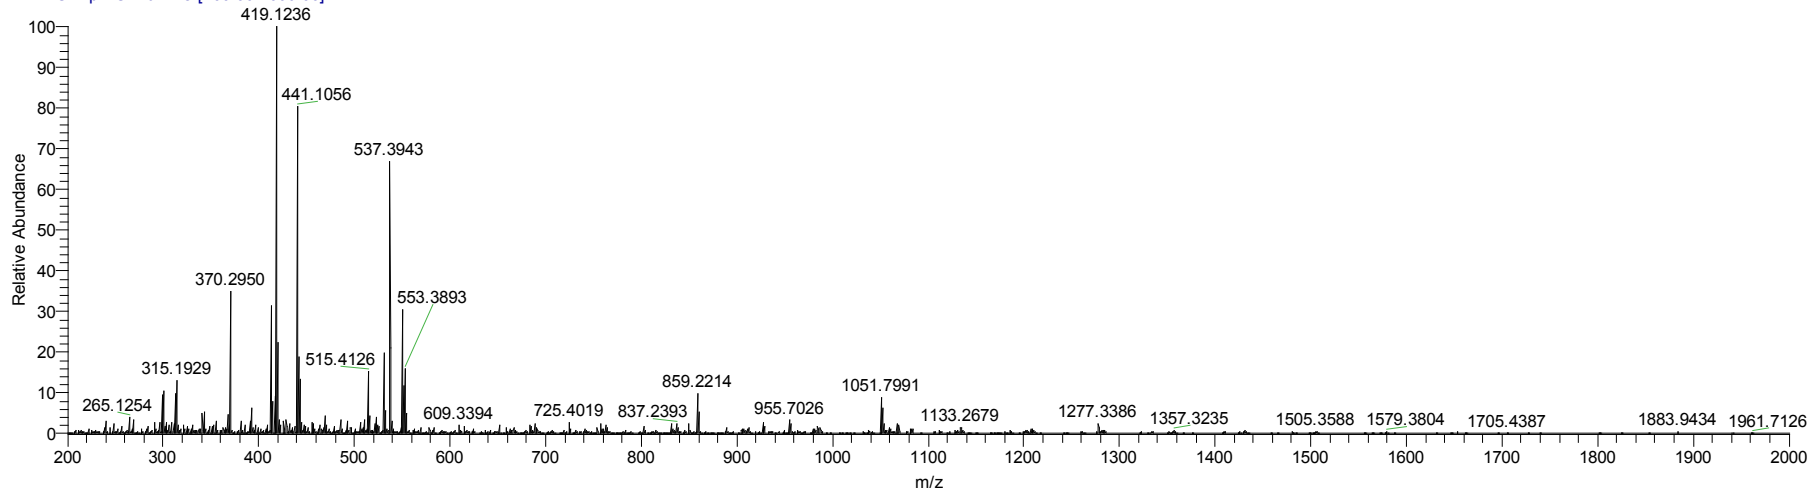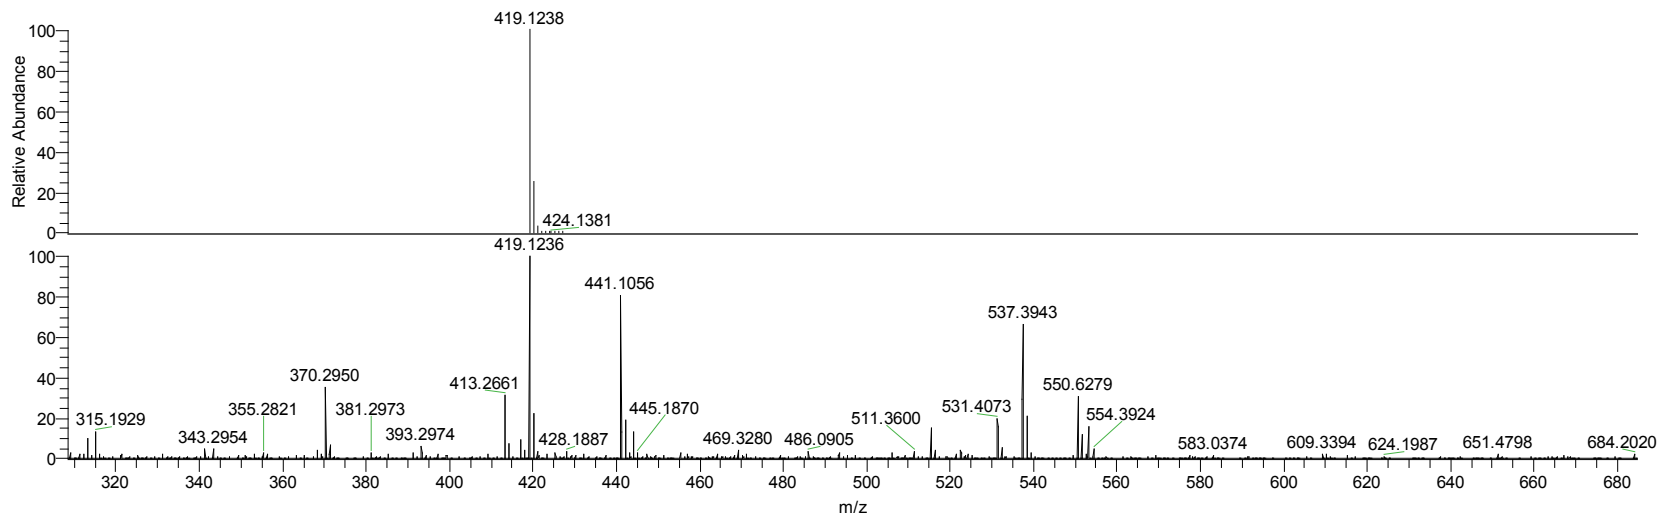

NL:  
7.62E5  
C<sub>23</sub>H<sub>19</sub>O<sub>6</sub>N<sub>2</sub>:  
C<sub>23</sub>H<sub>19</sub>O<sub>6</sub>N<sub>2</sub>  
pa Chrg 1

NL:  
8.65E6  
MTM-III-89#20 RT:  
0.19 AV: 1 T:  
FTMS + p ESI Full  
ms  
[200.00-2000.00]



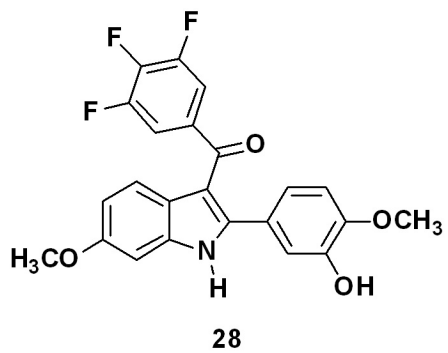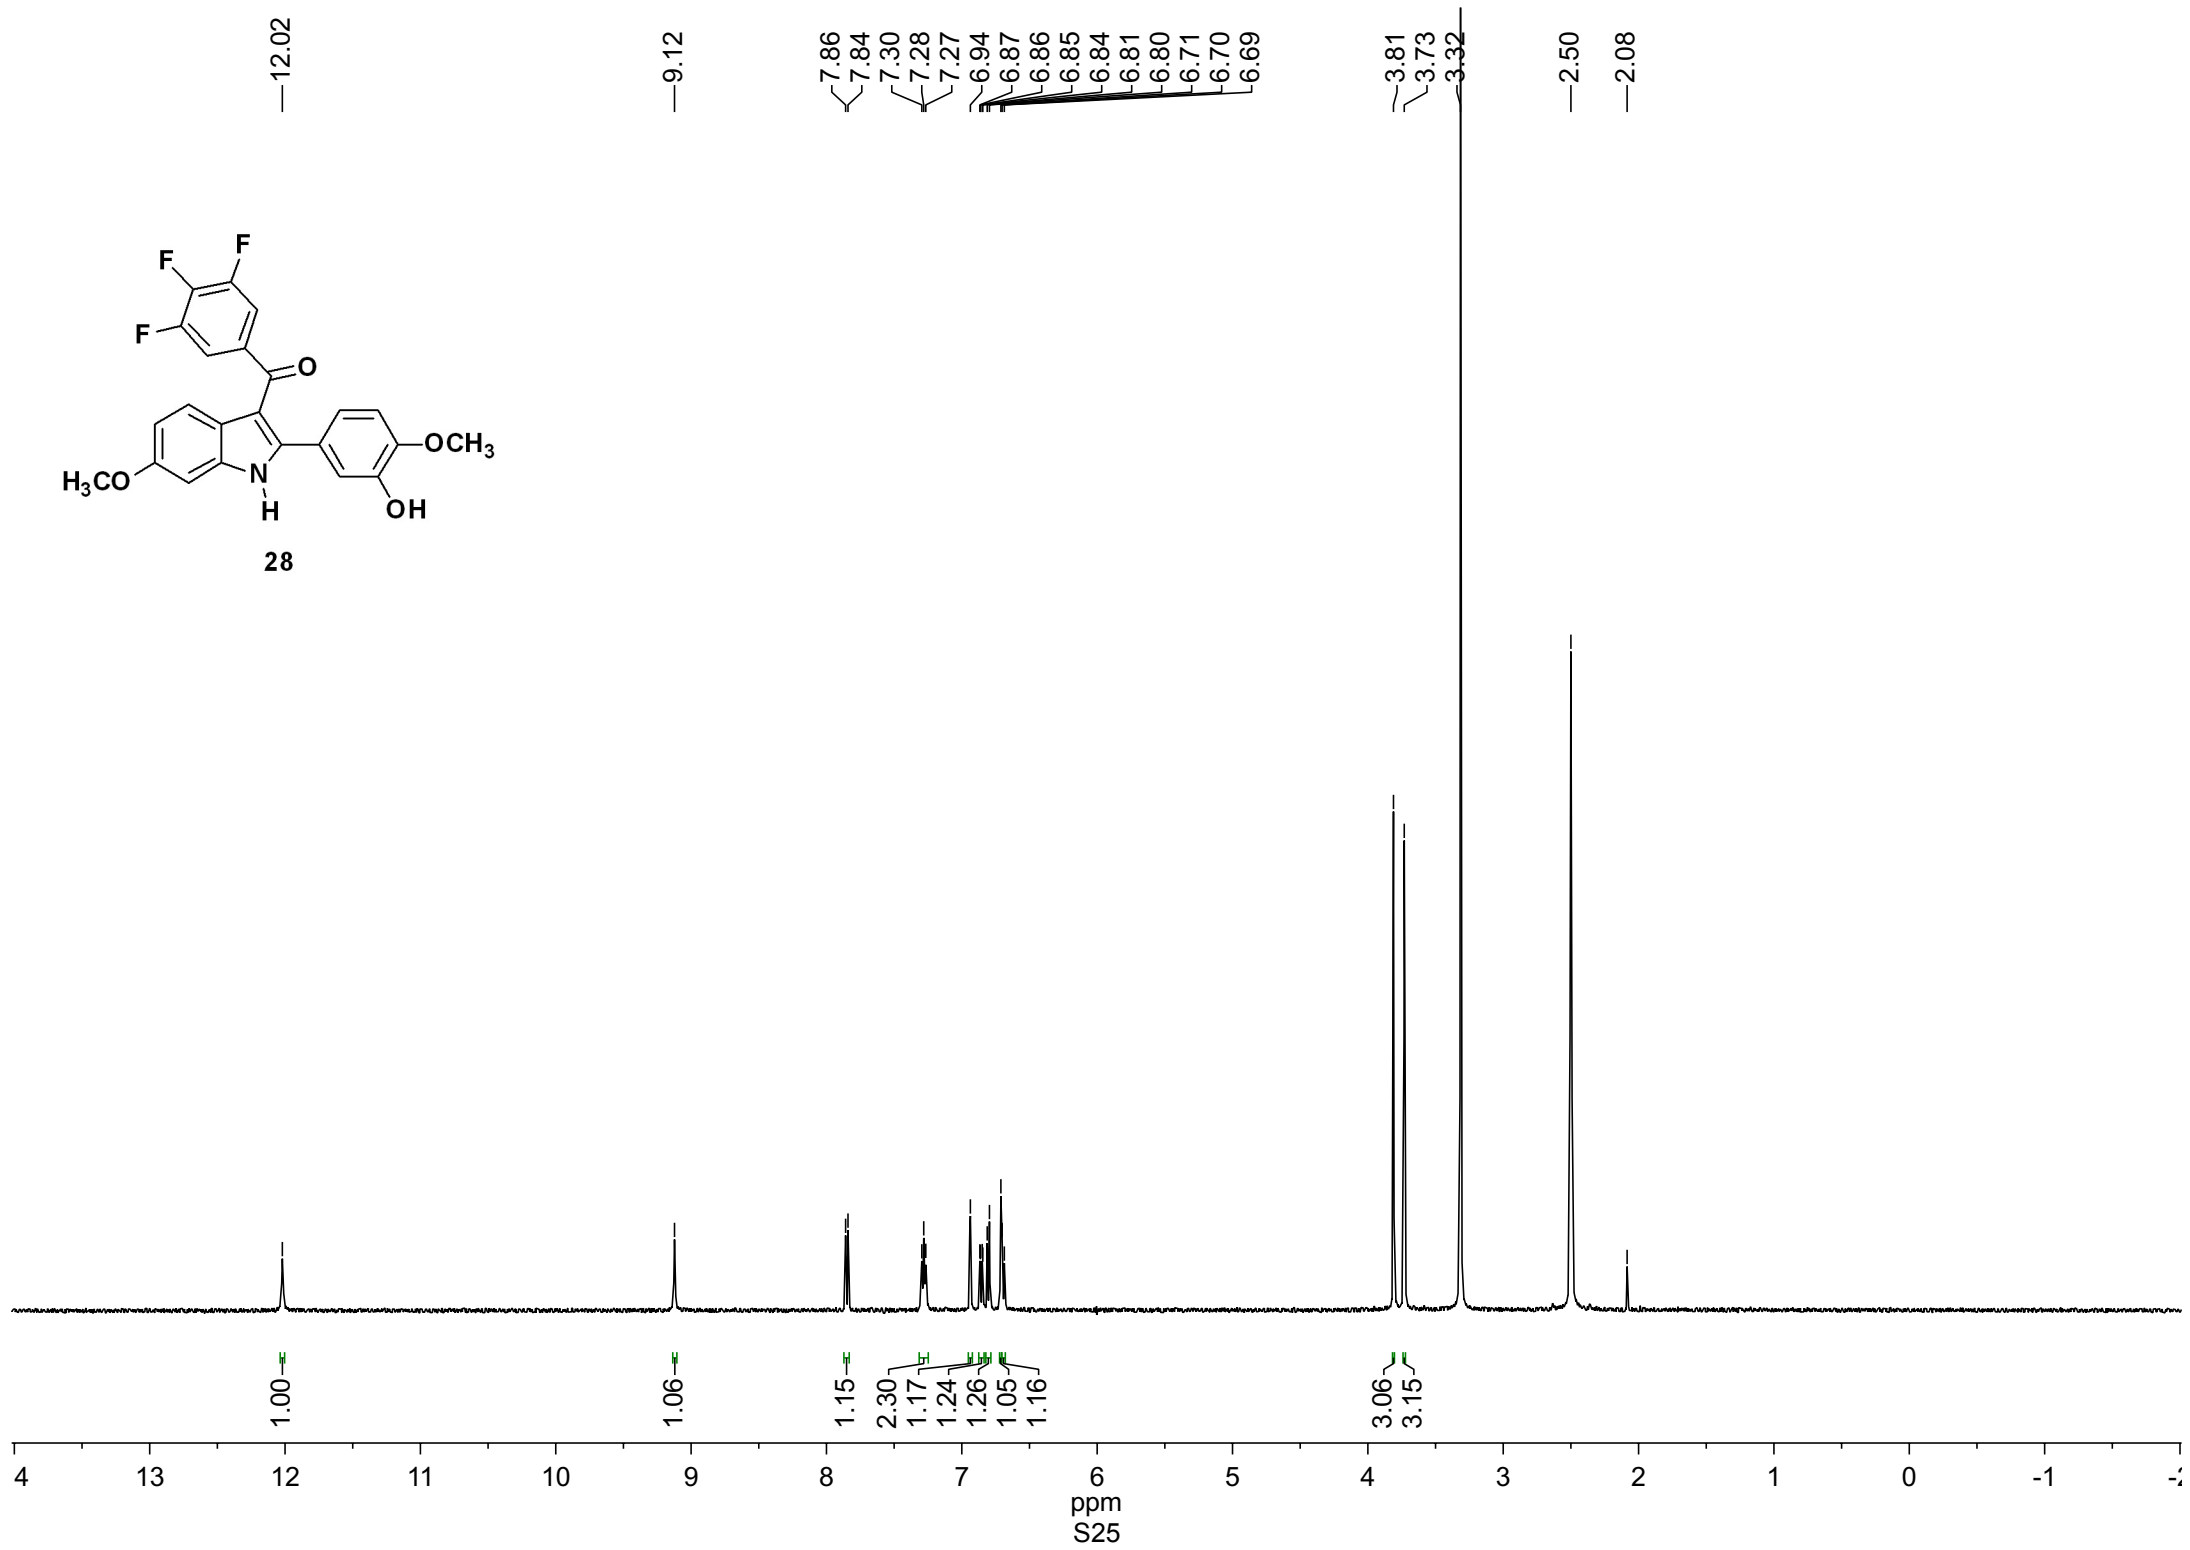

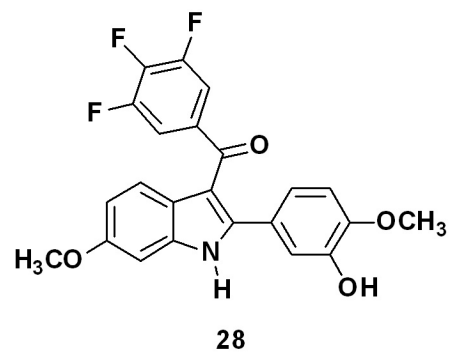

188.00  
156.58  
150.48  
150.42  
148.50  
148.45  
148.23  
146.14  
145.46  
141.15  
141.03  
139.14  
139.01  
138.89  
136.74  
136.69  
136.65  
124.16  
122.03  
121.43  
121.21  
116.75  
113.63  
111.76  
111.53  
110.81  
94.87  
55.82  
55.30  
40.02  
39.85  
39.69  
39.52  
39.35  
39.19  
39.02

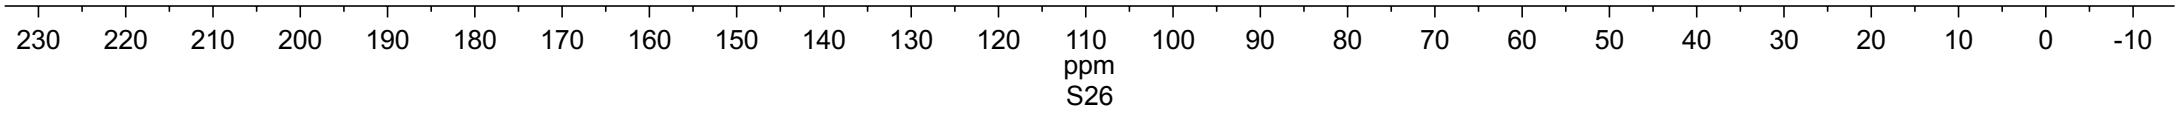

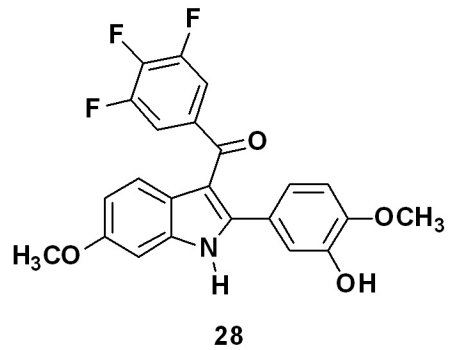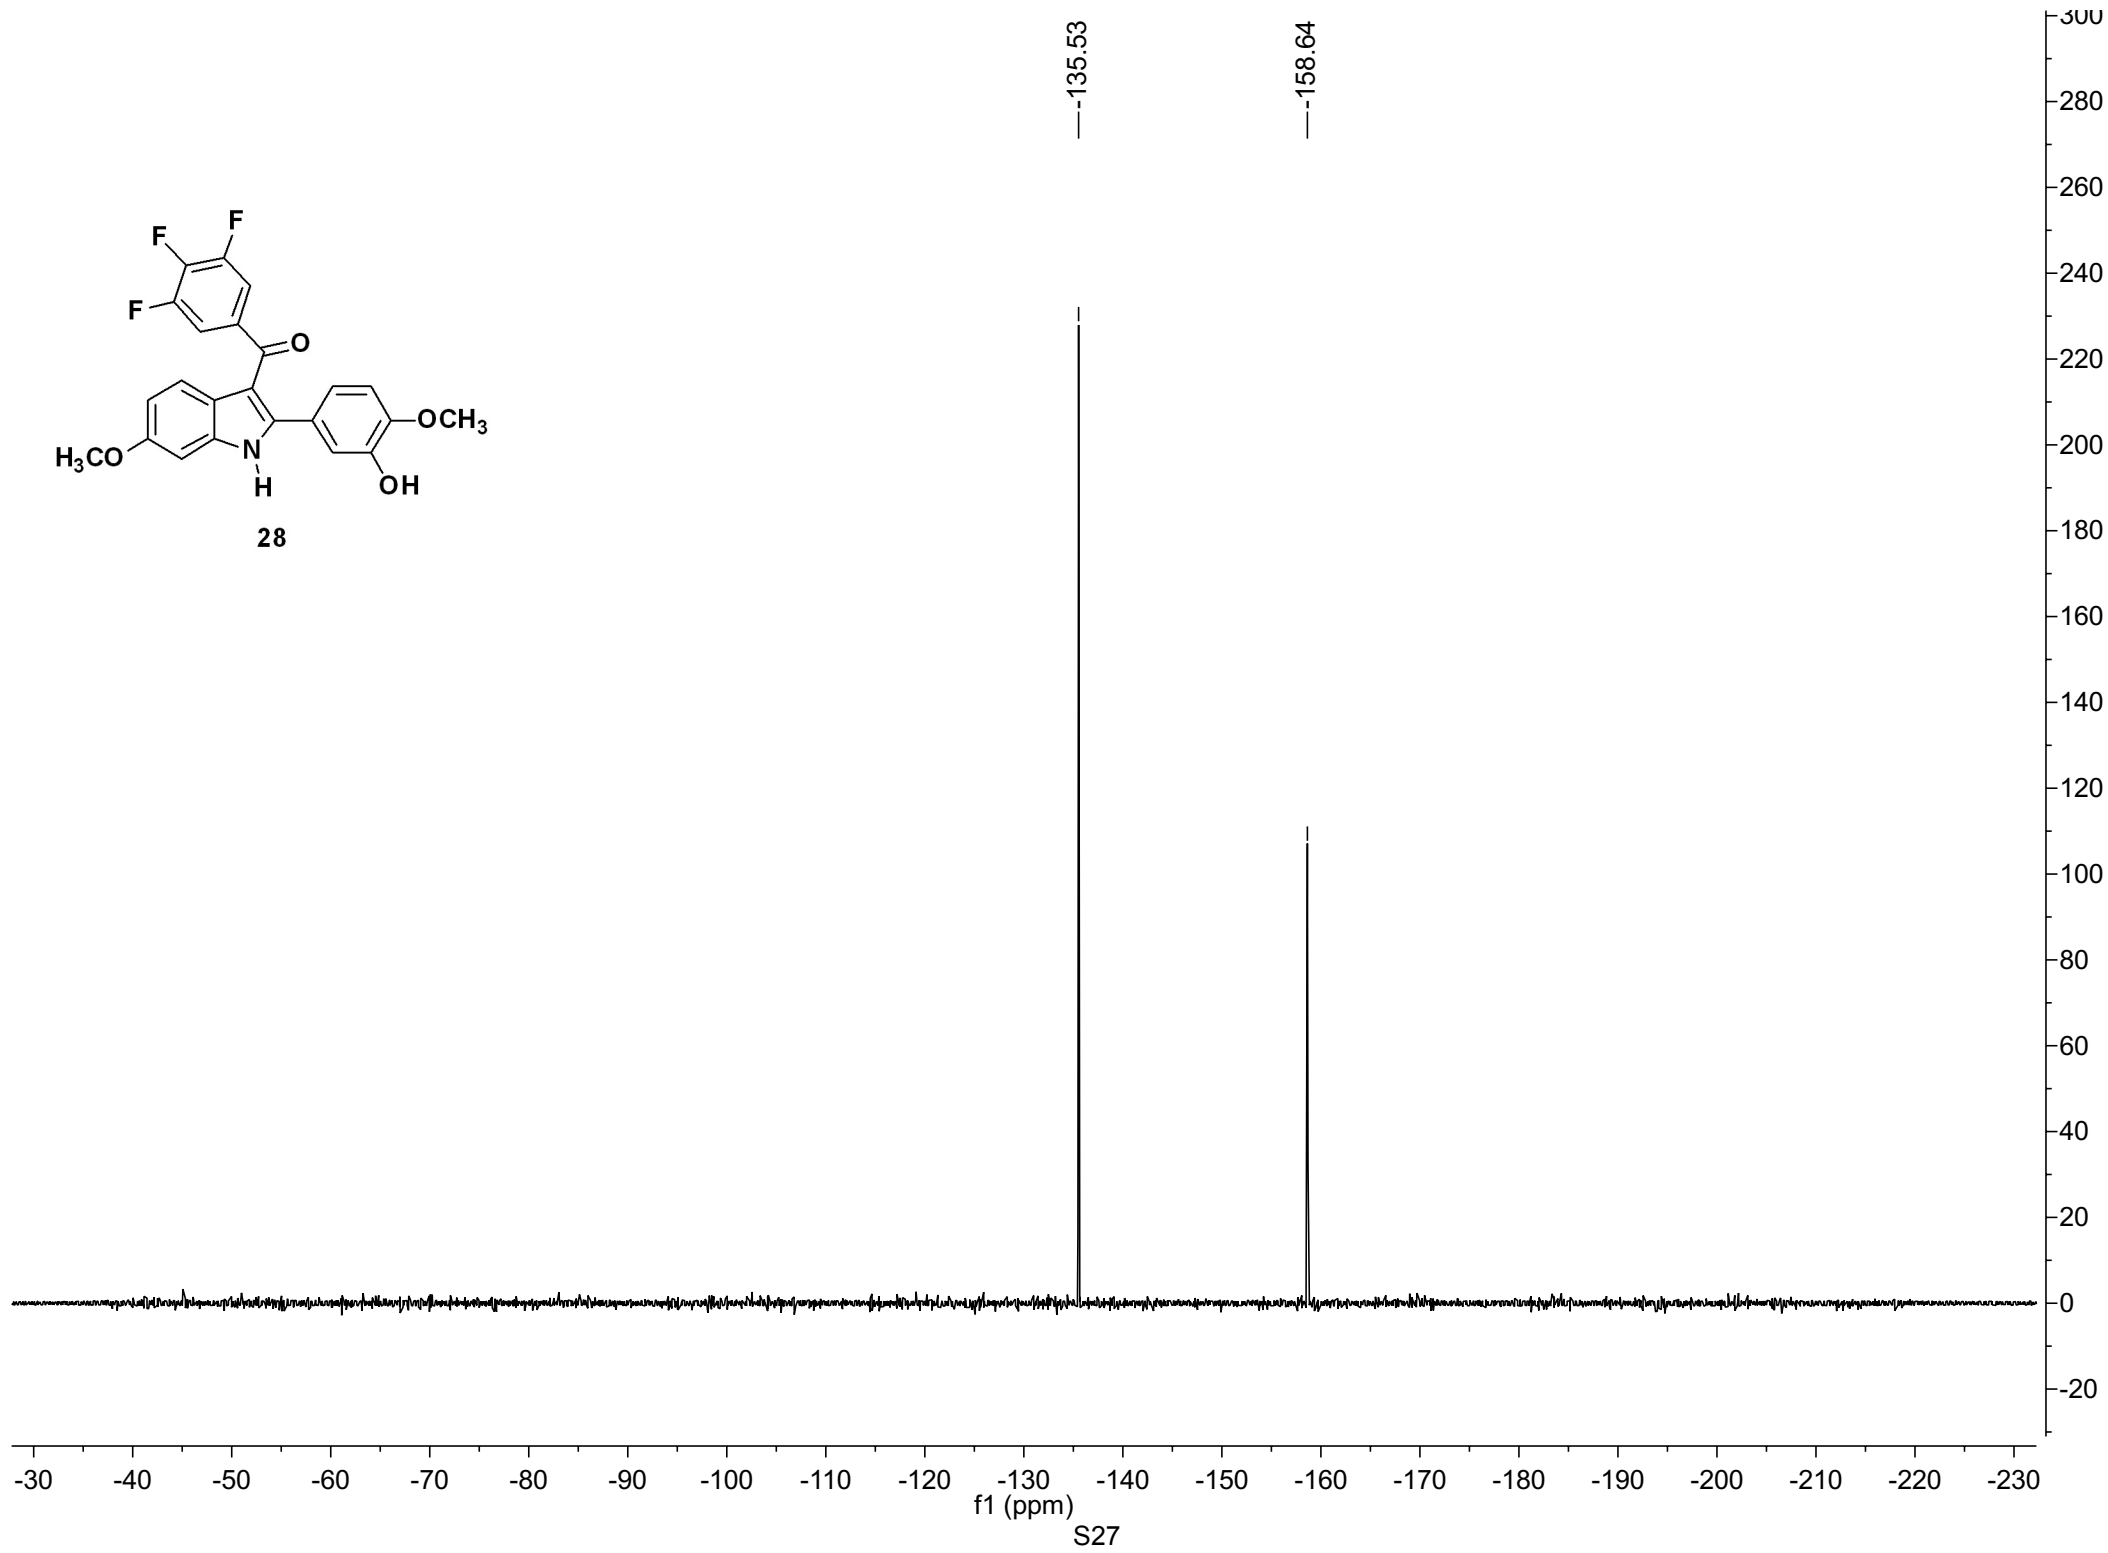

Sample Name: run1

### HPLC traces of compound 28

=====

Acq. Operator : Matt Mac  
Acq. Instrument : Instrument 1 Location : -  
Injection Date : 1/9/2013 2:09:32 PM  
Acq. Method : C:\CHEM32\1\METHODS\MASTERMETHOD.M  
Last changed : 1/9/2013 2:01:45 PM by Matt Mac  
Analysis Method : C:\CHEM32\1\METHODS\MASTERMETHOD.M  
Last changed : 1/9/2013 2:04:11 PM by Matt Mac  
(modified after loading)

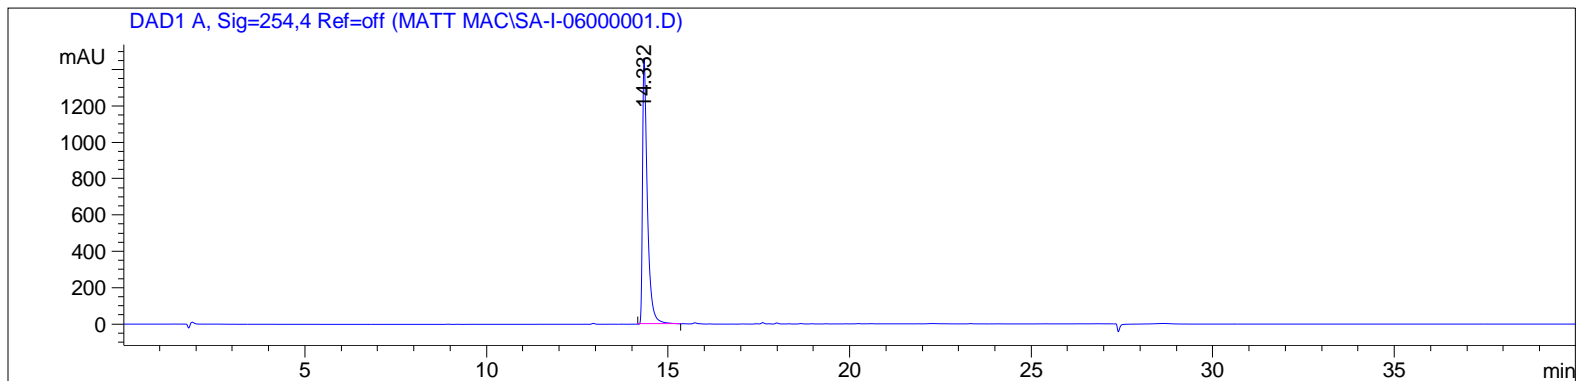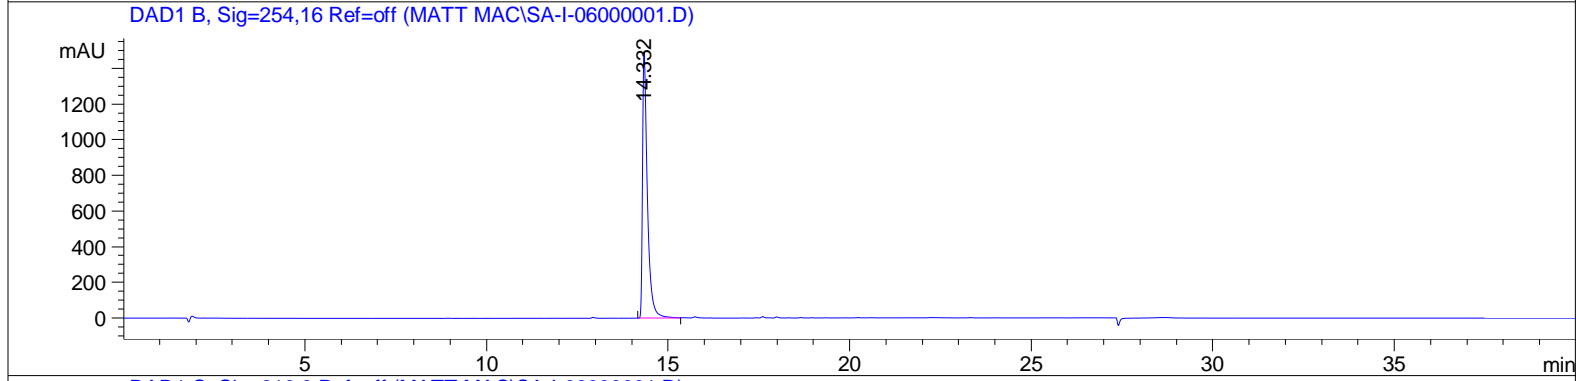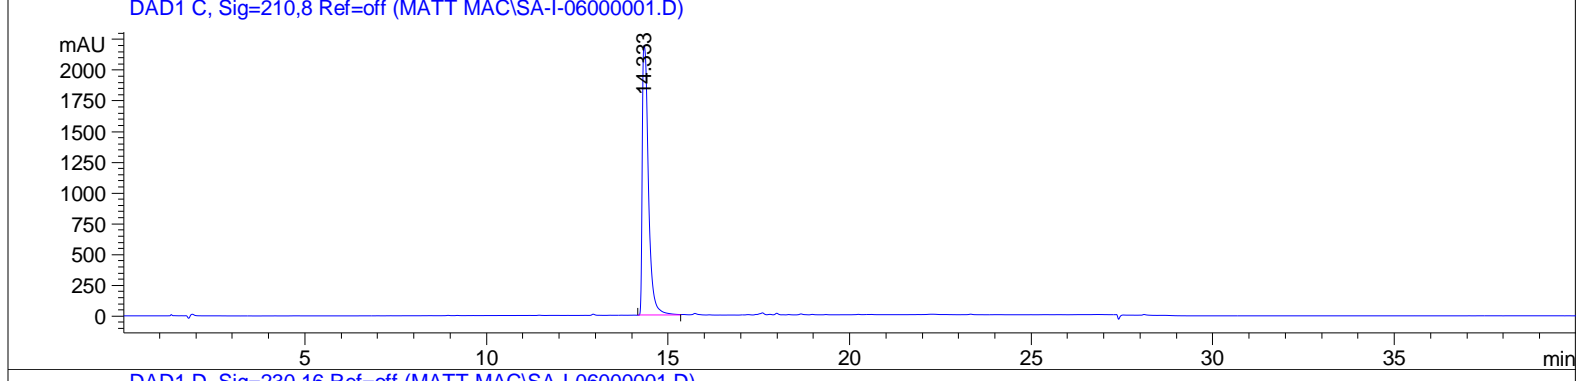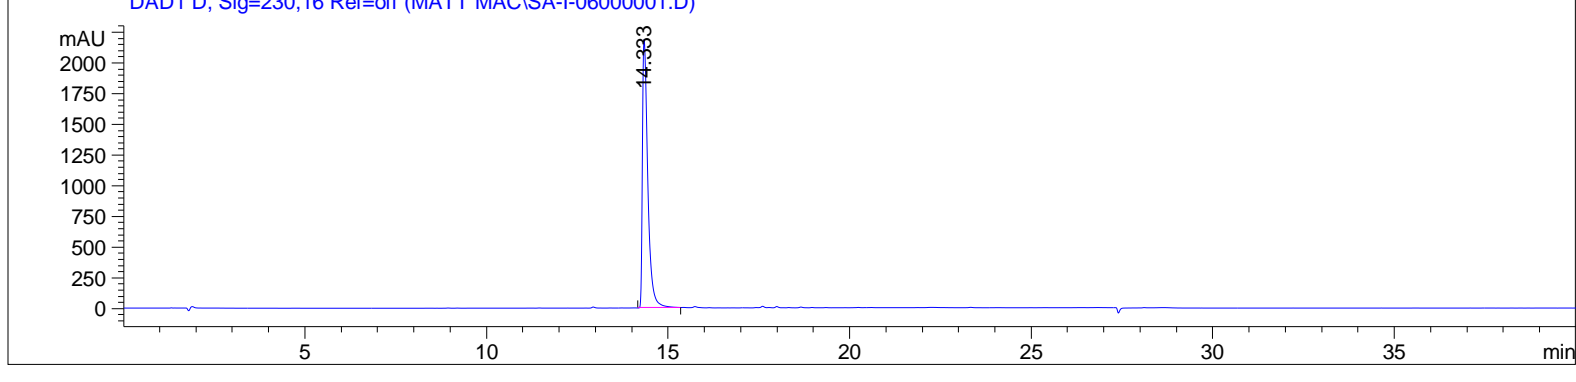

Sample Name: run1

### HPLC traces of compound 28

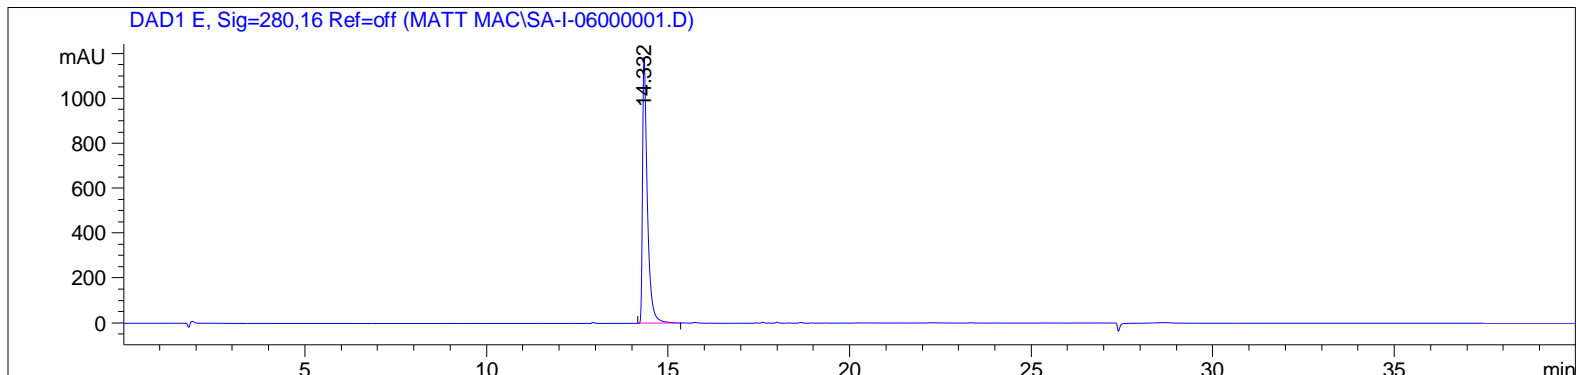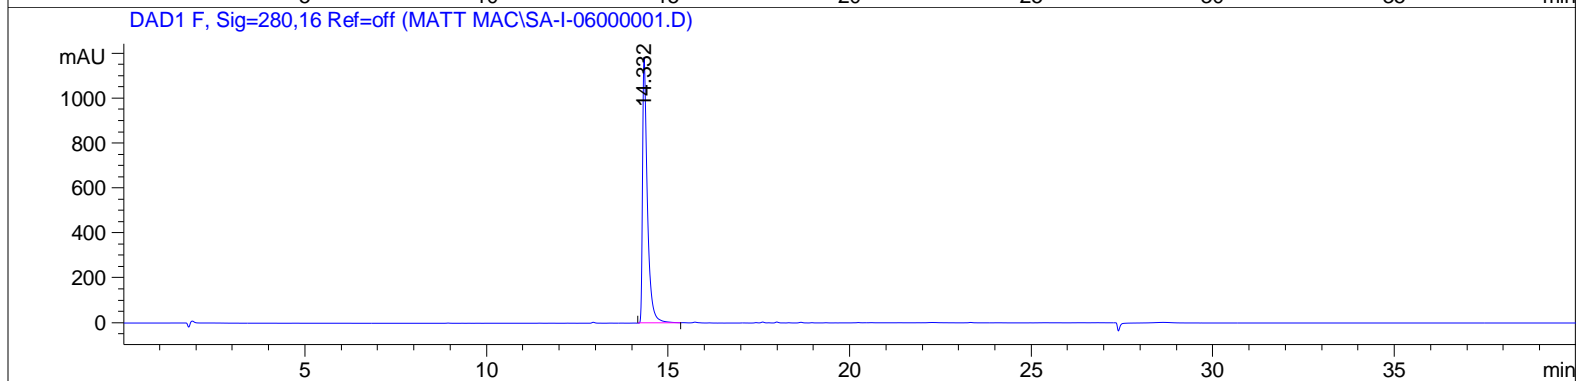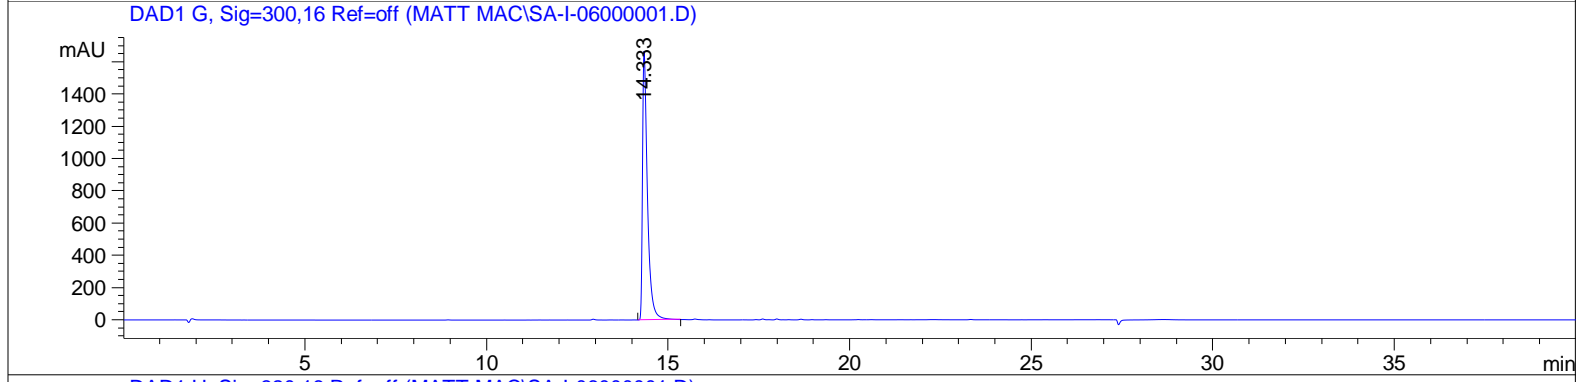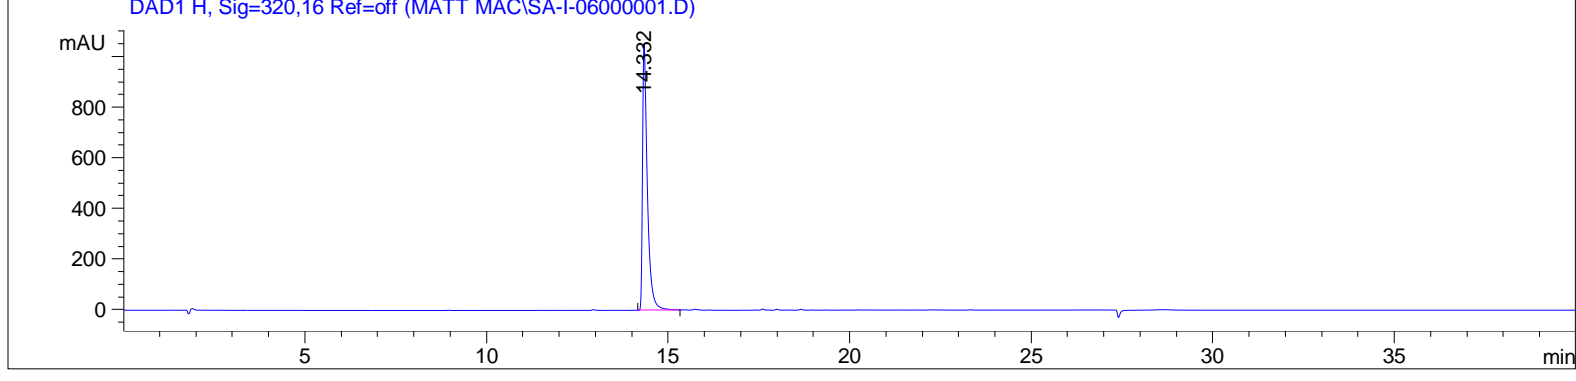

=====  
Area Percent Report  
=====

Sorted By : Signal  
Multiplier : 1.0000  
Dilution : 1.0000  
Use Multiplier & Dilution Factor with ISTDs

HPLC traces of compound 28

Signal 1: DAD1 A, Sig=254,4 Ref=off

| Peak # | RetTime [min] | Type | Width [min] | Area [mAU*s] | Height [mAU] | Area %   |
|--------|---------------|------|-------------|--------------|--------------|----------|
| 1      | 14.332        | BV   | 0.1353      | 1.37124e4    | 1463.69946   | 100.0000 |

Totals : 1.37124e4 1463.69946

Signal 2: DAD1 B, Sig=254,16 Ref=off

| Peak # | RetTime [min] | Type | Width [min] | Area [mAU*s] | Height [mAU] | Area %   |
|--------|---------------|------|-------------|--------------|--------------|----------|
| 1      | 14.332        | BV   | 0.1354      | 1.39932e4    | 1492.83130   | 100.0000 |

Totals : 1.39932e4 1492.83130

Signal 3: DAD1 C, Sig=210,8 Ref=off

| Peak # | RetTime [min] | Type | Width [min] | Area [mAU*s] | Height [mAU] | Area %   |
|--------|---------------|------|-------------|--------------|--------------|----------|
| 1      | 14.333        | BV   | 0.1830      | 2.61008e4    | 2190.66382   | 100.0000 |

Totals : 2.61008e4 2190.66382

Signal 4: DAD1 D, Sig=230,16 Ref=off

| Peak # | RetTime [min] | Type | Width [min] | Area [mAU*s] | Height [mAU] | Area %   |
|--------|---------------|------|-------------|--------------|--------------|----------|
| 1      | 14.333        | BV   | 0.1573      | 2.27137e4    | 2185.28418   | 100.0000 |

Totals : 2.27137e4 2185.28418

Signal 5: DAD1 E, Sig=280,16 Ref=off

| Peak # | RetTime [min] | Type | Width [min] | Area [mAU*s] | Height [mAU] | Area %   |
|--------|---------------|------|-------------|--------------|--------------|----------|
| 1      | 14.332        | BV   | 0.1345      | 1.10130e4    | 1183.79114   | 100.0000 |

Totals : 1.10130e4 1183.79114

Sample Name: run1

### HPLC traces of compound 28

Signal 6: DAD1 F, Sig=280,16 Ref=off

| Peak # | RetTime [min] | Type | Width [min] | Area [mAU*s] | Height [mAU] | Area %   |
|--------|---------------|------|-------------|--------------|--------------|----------|
| 1      | 14.332        | BV   | 0.1345      | 1.10130e4    | 1183.79114   | 100.0000 |

Totals : 1.10130e4 1183.79114

Signal 7: DAD1 G, Sig=300,16 Ref=off

| Peak # | RetTime [min] | Type | Width [min] | Area [mAU*s] | Height [mAU] | Area %   |
|--------|---------------|------|-------------|--------------|--------------|----------|
| 1      | 14.333        | BB   | 0.1388      | 1.58261e4    | 1666.54199   | 100.0000 |

Totals : 1.58261e4 1666.54199

Signal 8: DAD1 H, Sig=320,16 Ref=off

| Peak # | RetTime [min] | Type | Width [min] | Area [mAU*s] | Height [mAU] | Area %   |
|--------|---------------|------|-------------|--------------|--------------|----------|
| 1      | 14.332        | BV   | 0.1344      | 9783.57031   | 1052.70361   | 100.0000 |

Totals : 9783.57031 1052.70361

=====  
 \*\*\* End of Report \*\*\*

# HRMS of compound 28

C:\Xcalibur\...Matt\2-10-2013\SA-I-06

2/10/2013 5:04:20 PM

SA-I-06

SA-I-06 #20 RT: 0.16 AV: 1 NL: 3.19E7  
T: FTMS + p ESI Full ms [200.00-2000.00]

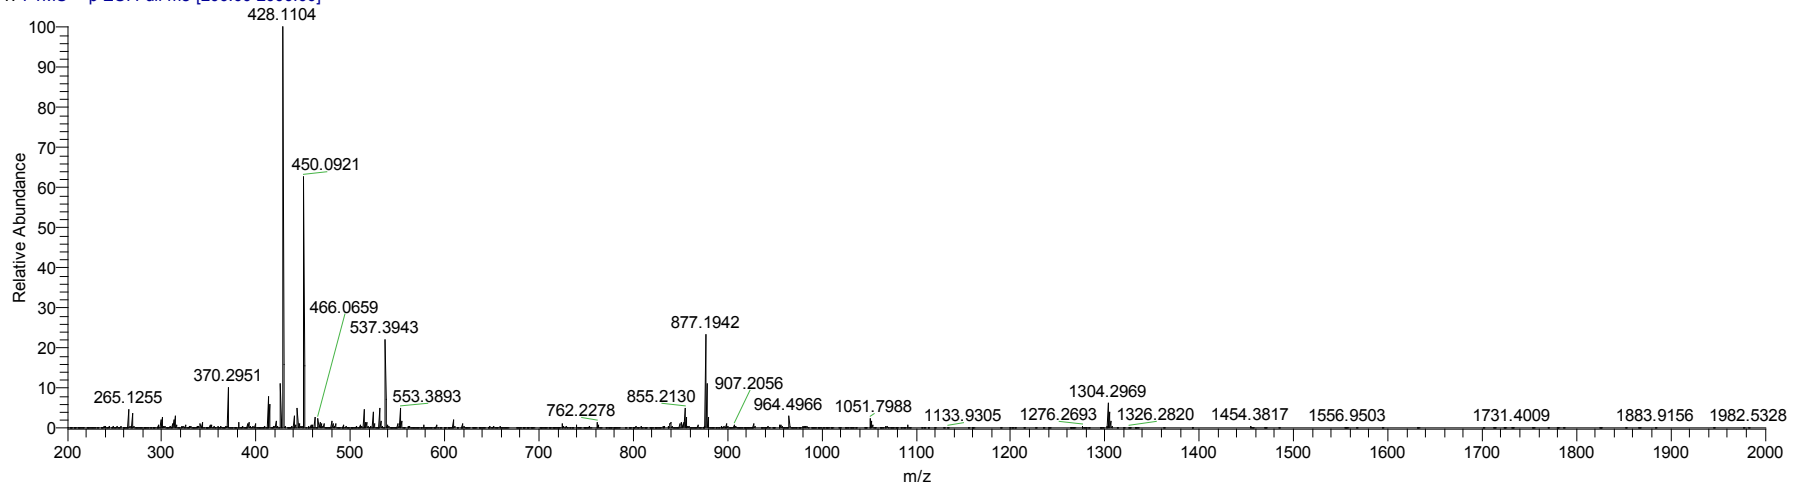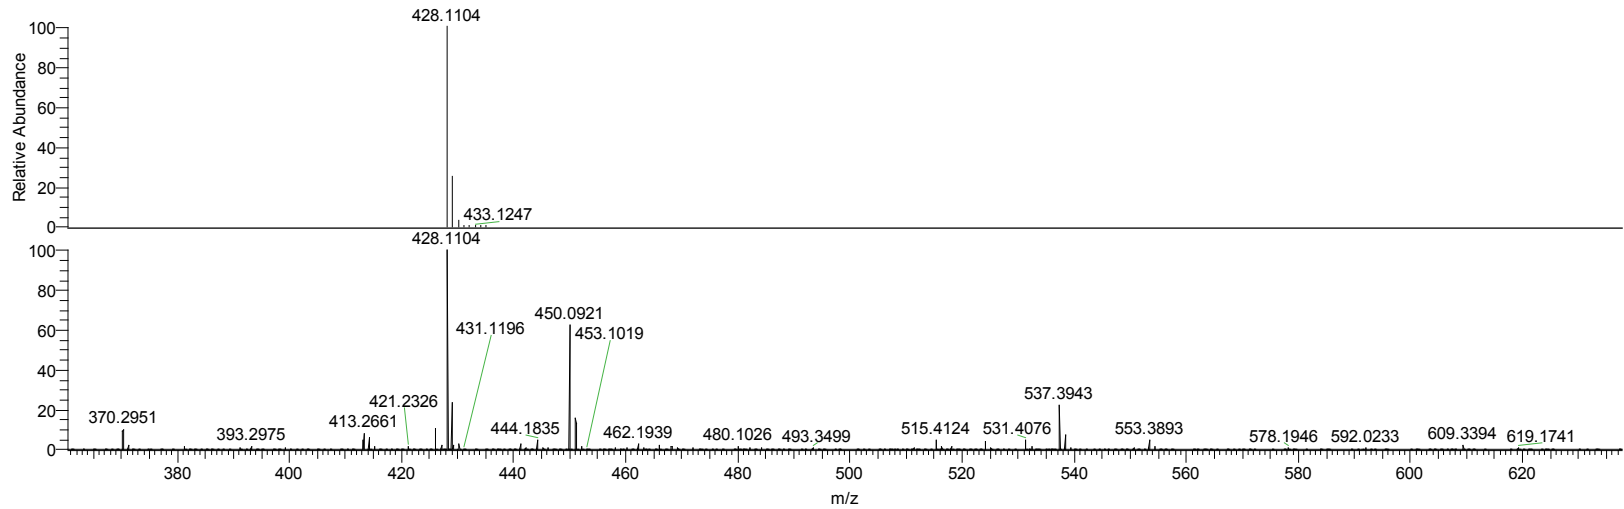

NL:  
7.69E5  
C<sub>23</sub>H<sub>17</sub>O<sub>4</sub>NF<sub>3</sub>:  
C<sub>23</sub>H<sub>17</sub>O<sub>4</sub>N<sub>1</sub>F<sub>3</sub>  
pa Chrg 1

NL:  
3.19E7  
SA-I-06#20 RT:  
0.16 AV: 1 T:  
FTMS + p ESI  
Full ms  
[200.00-2000.00]



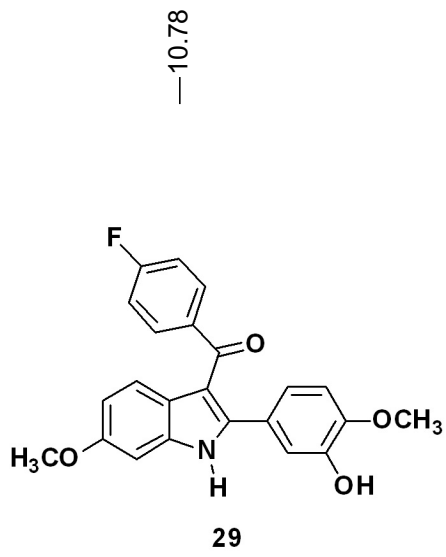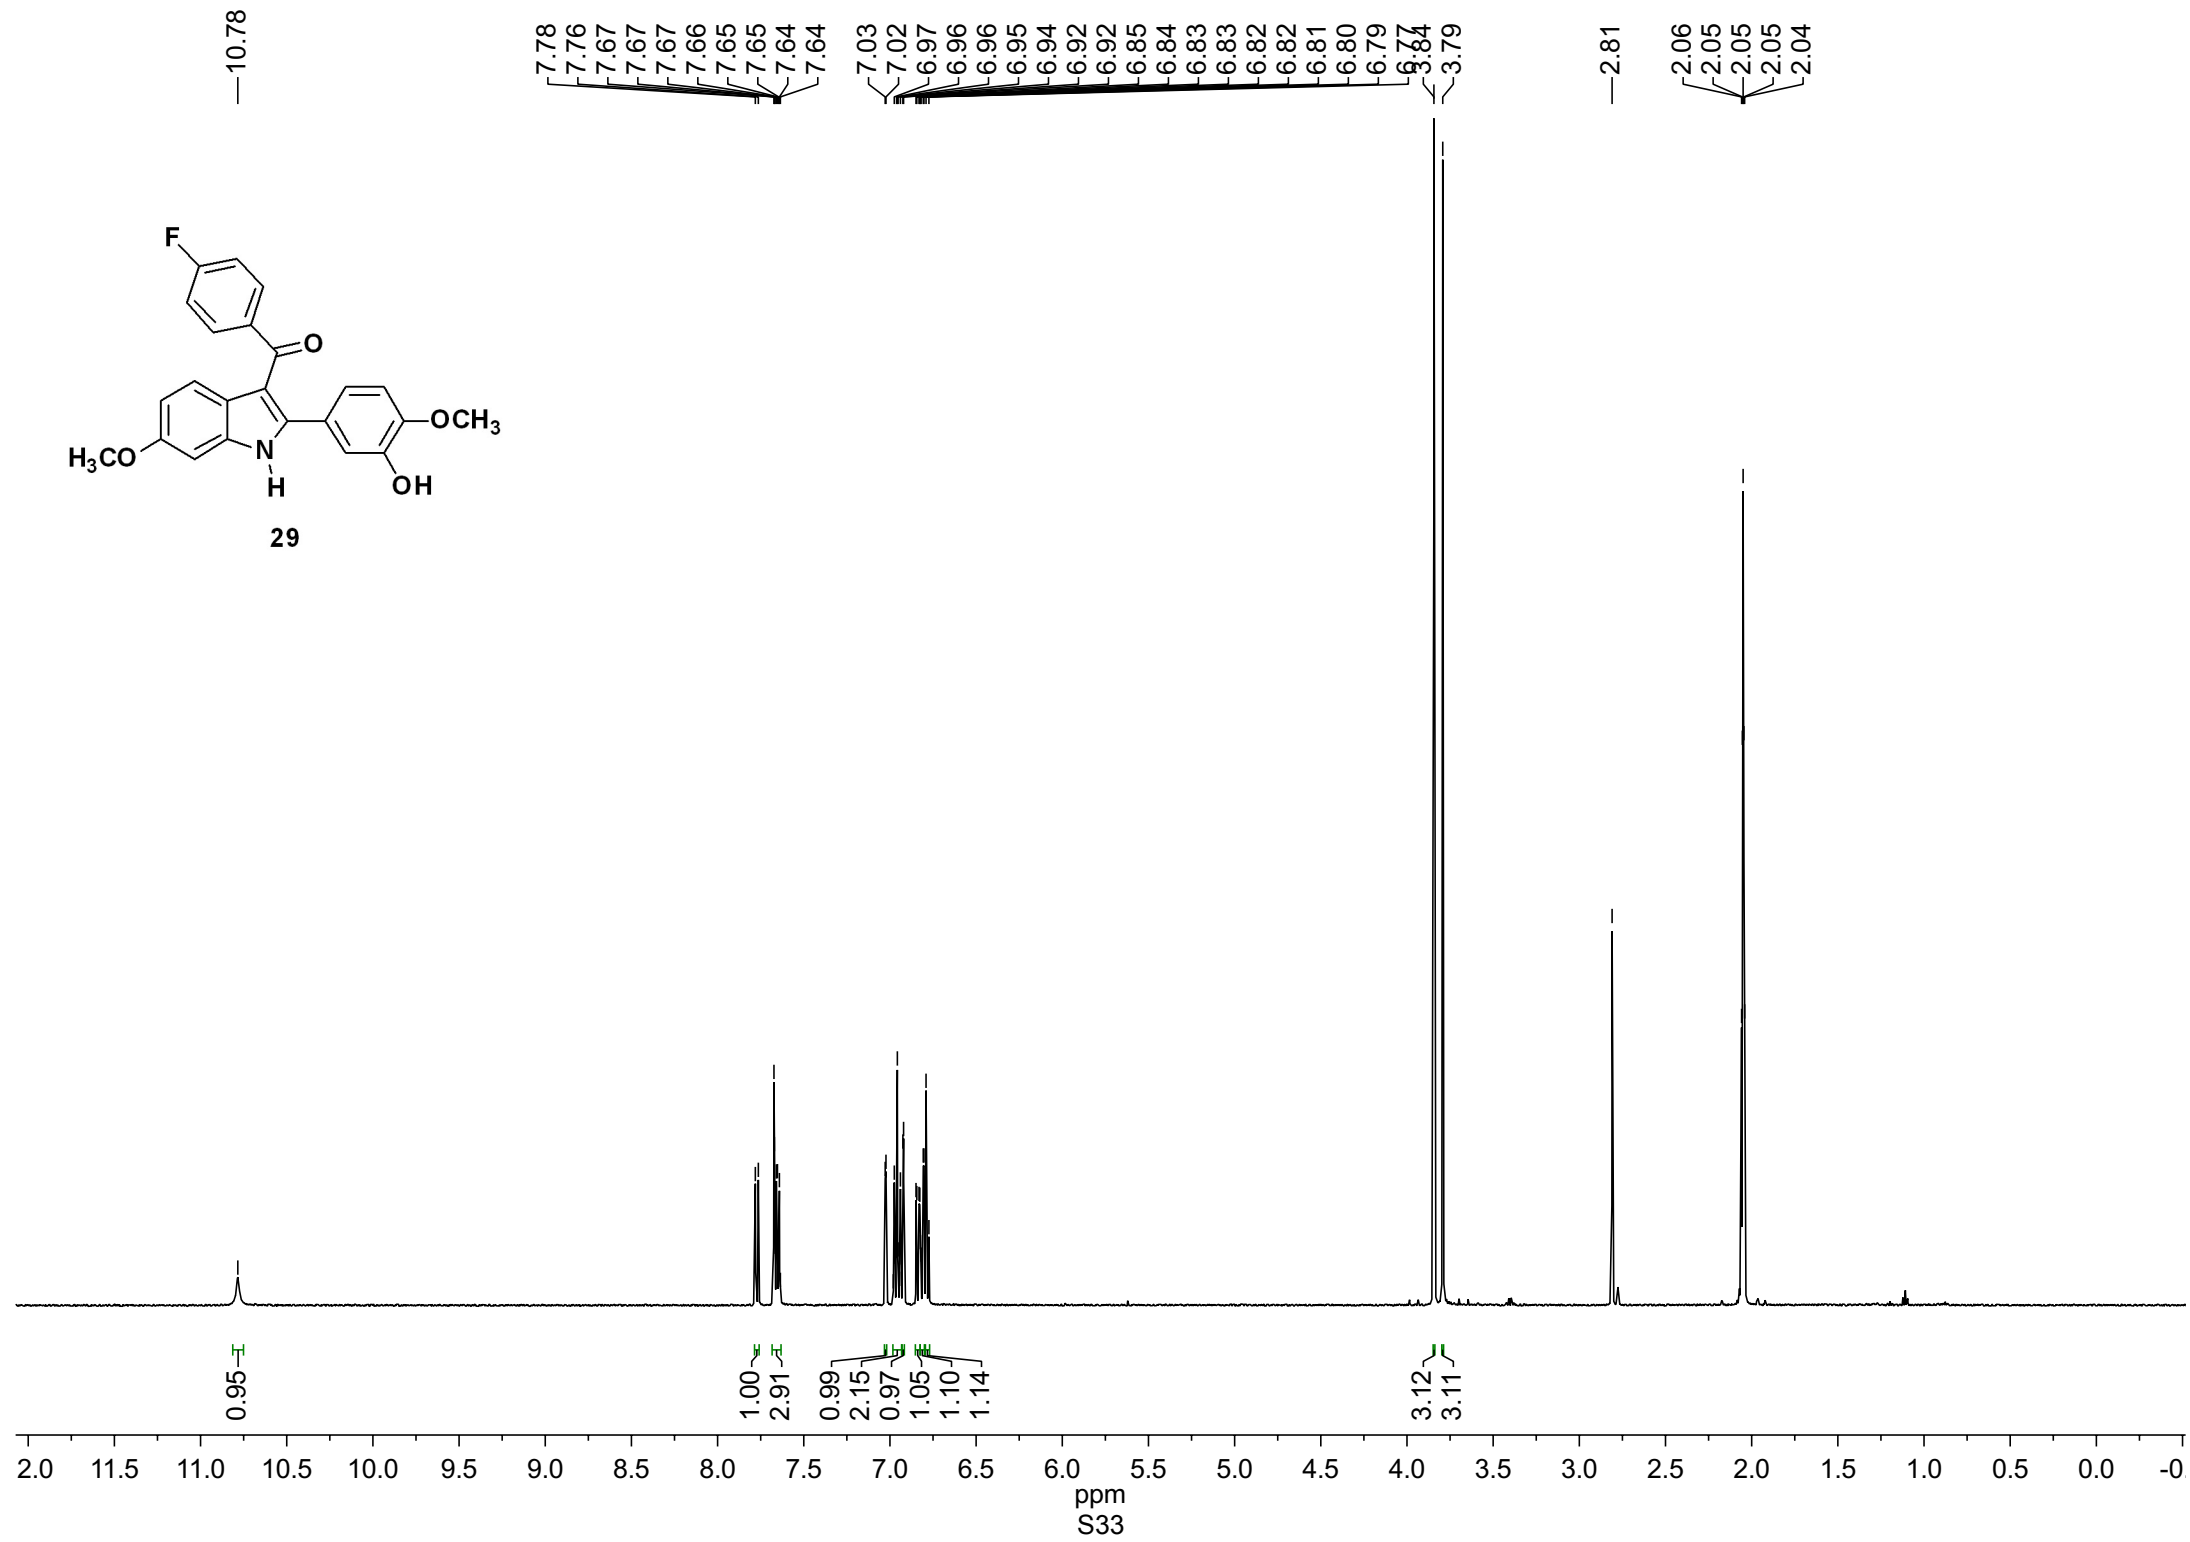

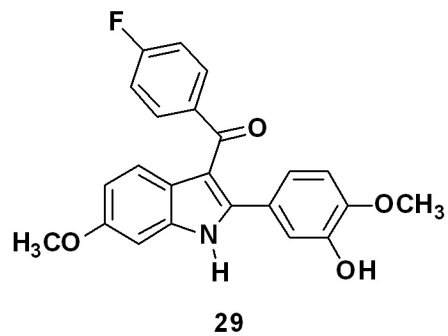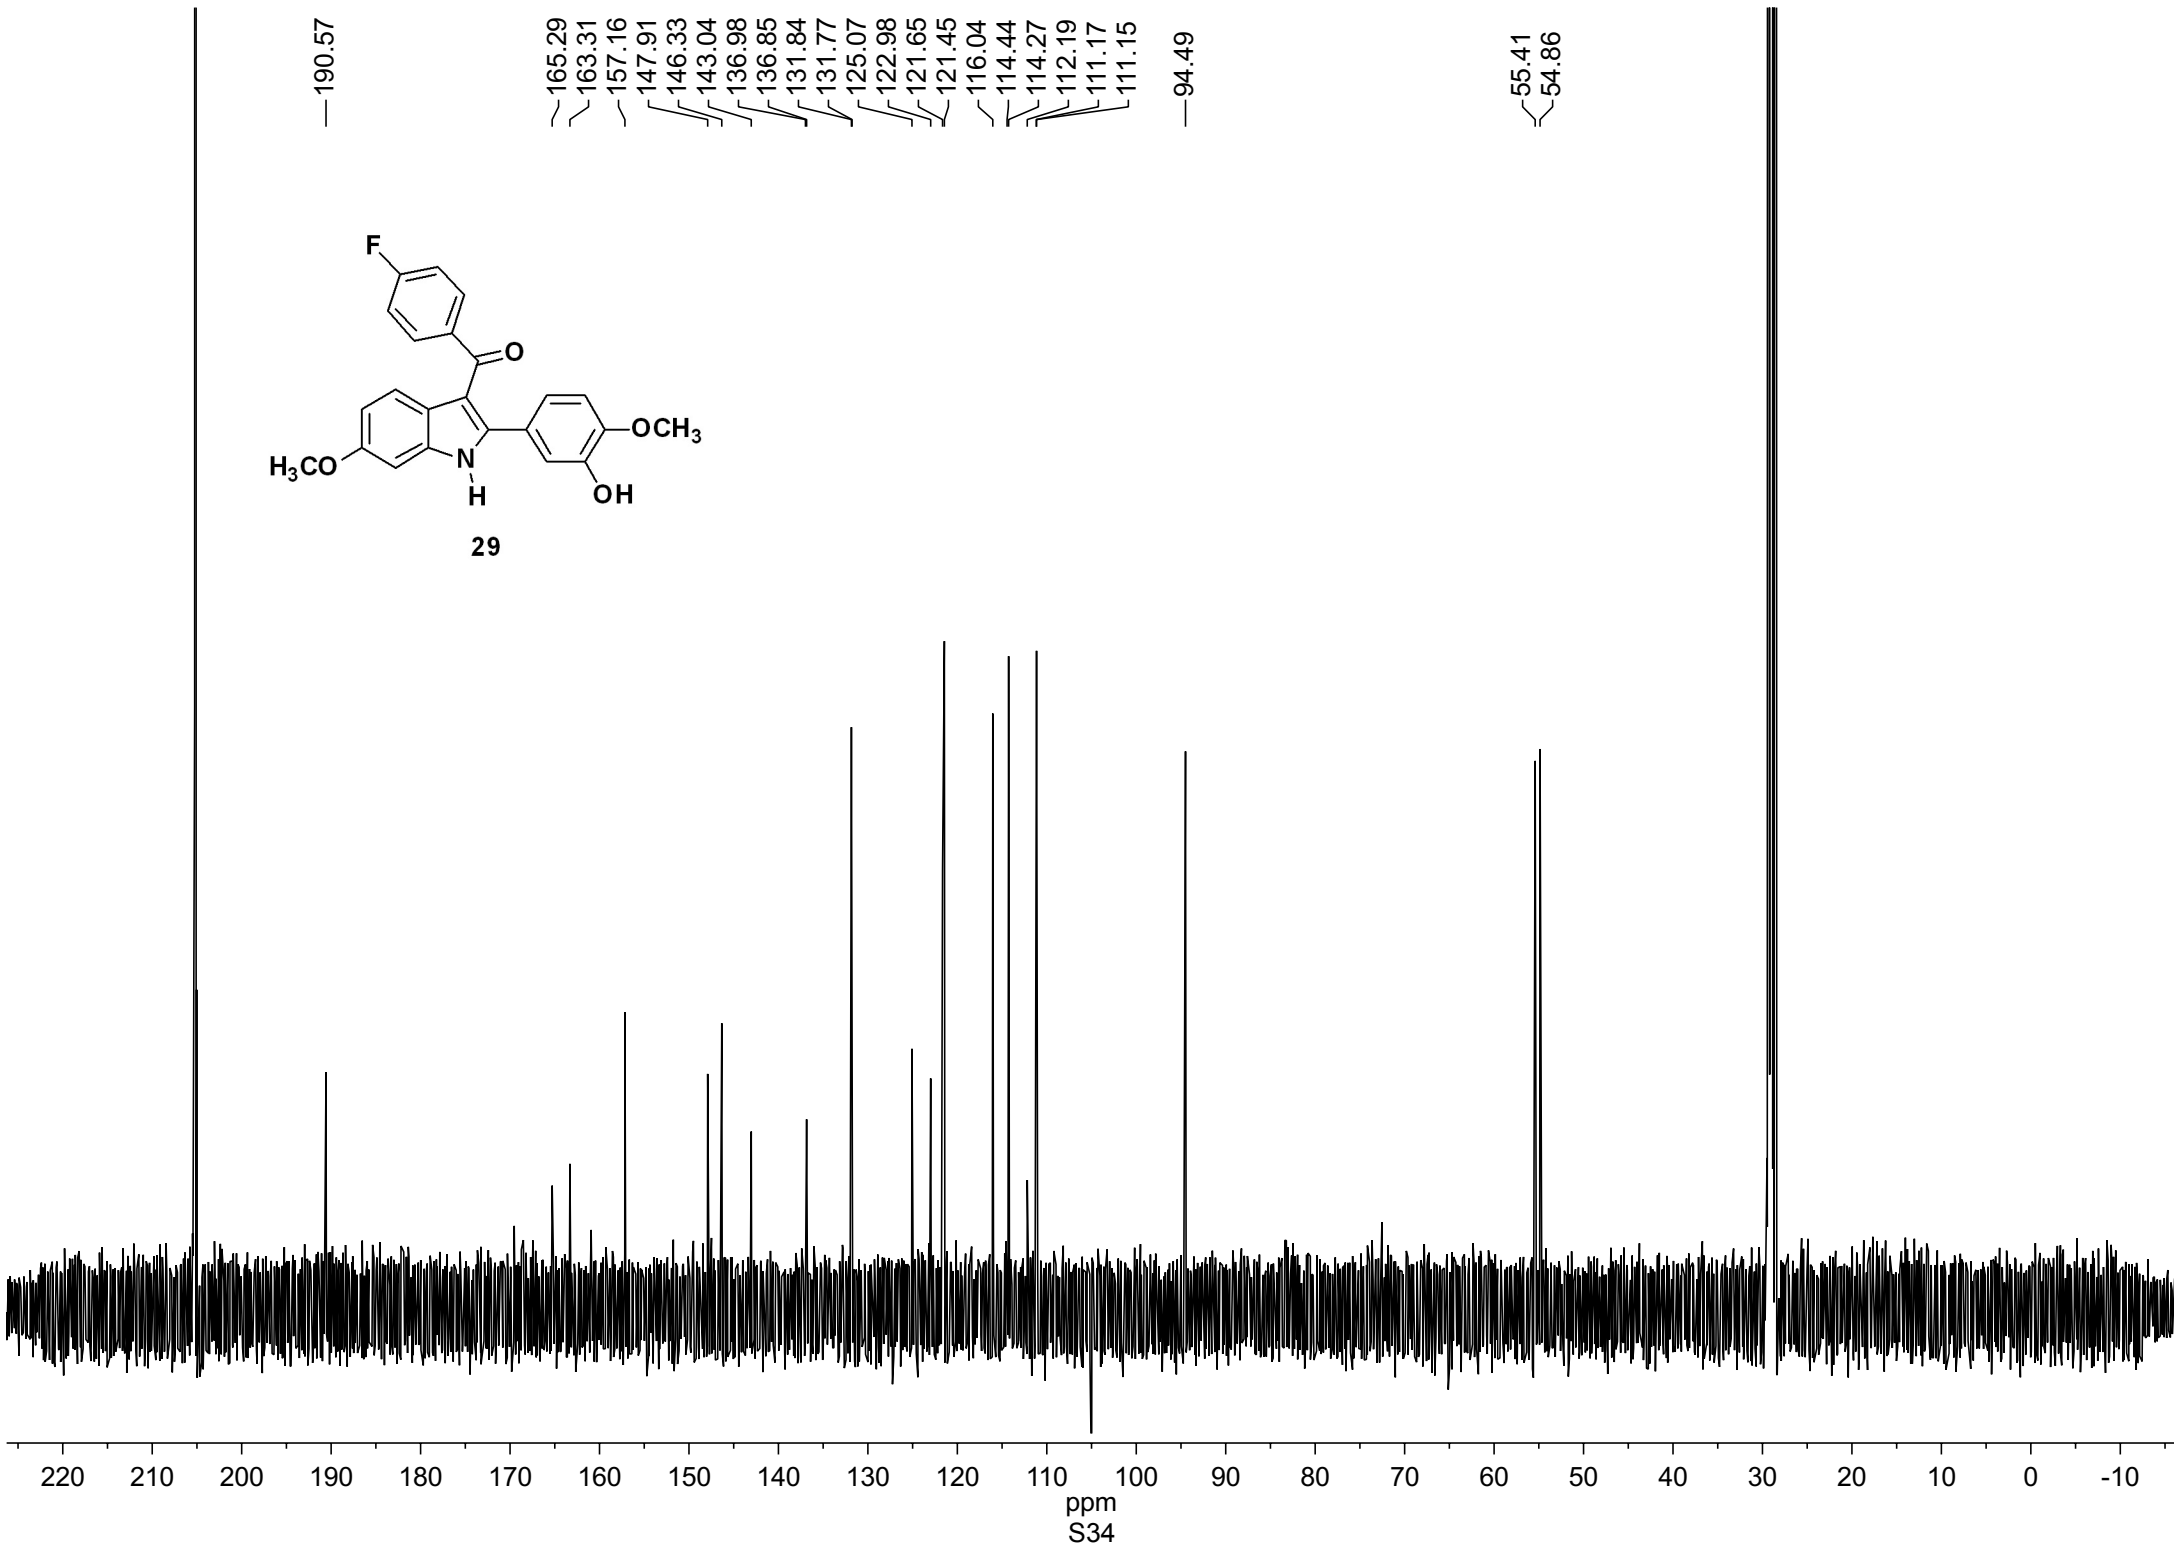

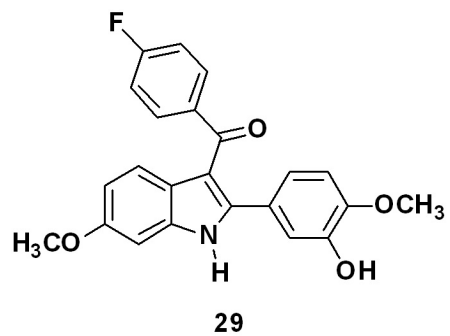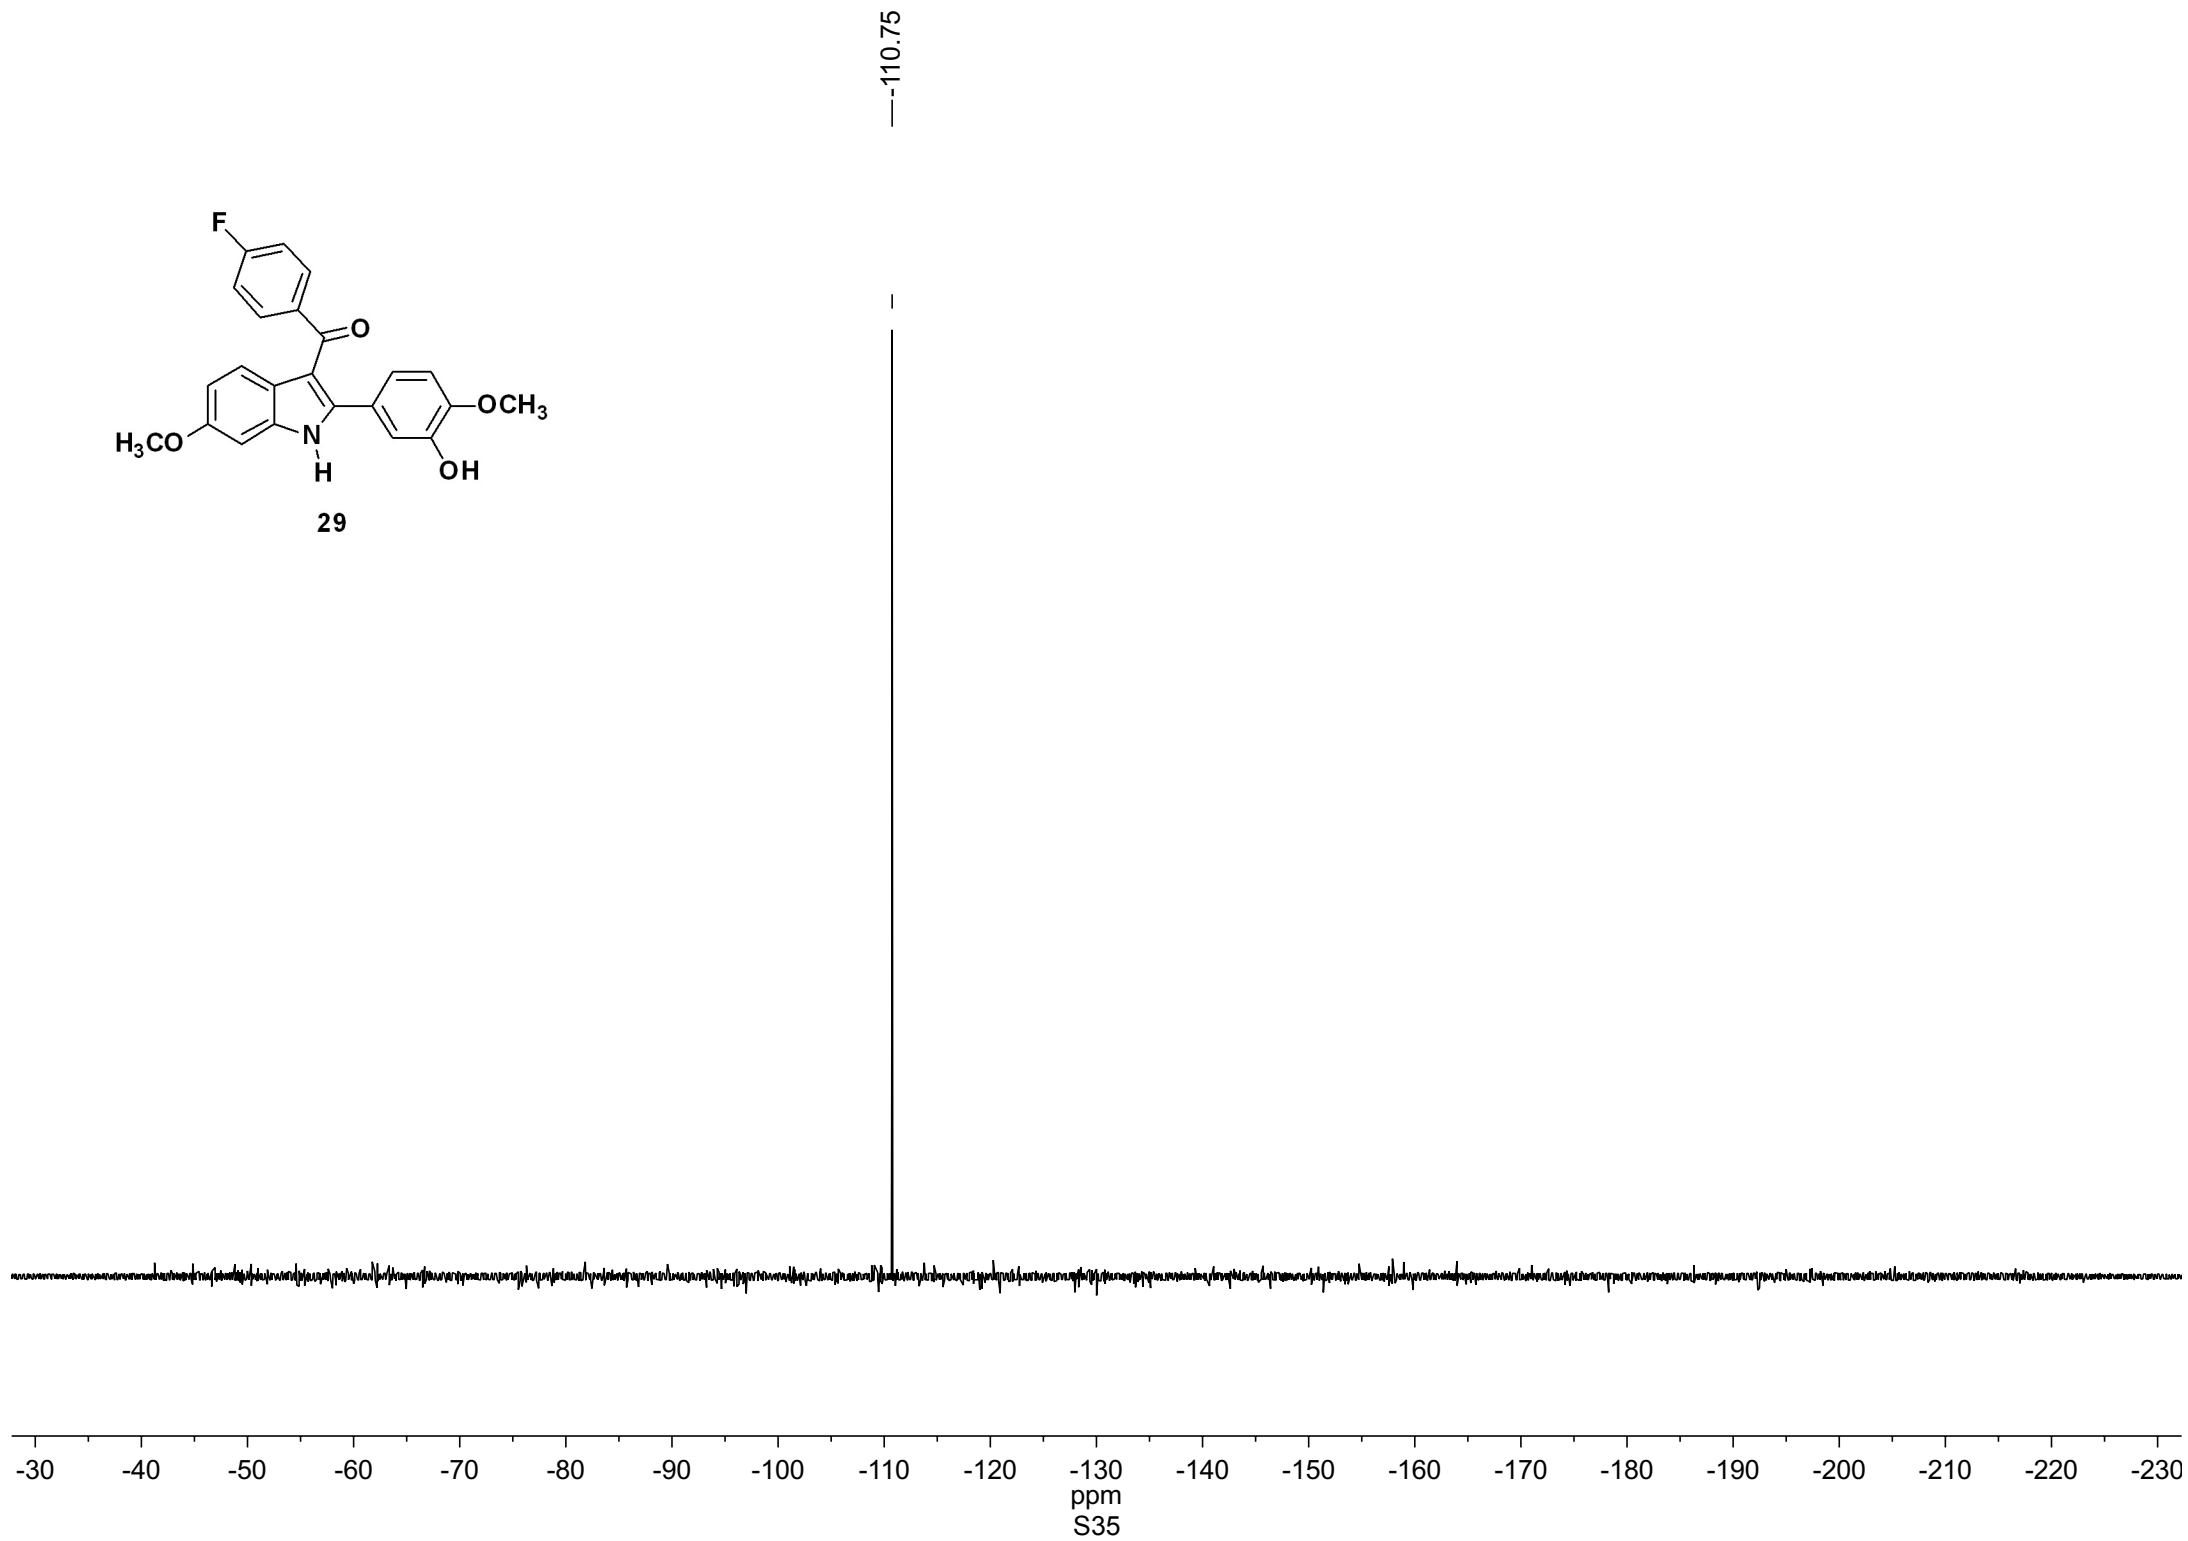

Sample Name: run1

## HPLC traces of compound 29

=====  
Acq. Operator : Matt Mac  
Acq. Instrument : Instrument 1 Location : -  
Injection Date : 1/8/2013 3:01:17 PM  
Acq. Method : C:\CHEM32\1\METHODS\MASTERMETHOD.M  
Last changed : 1/8/2013 2:20:25 PM by Matt Mac  
Analysis Method : C:\CHEM32\1\METHODS\MASTERMETHOD.M  
Last changed : 1/8/2013 8:58:30 AM by Matt Mac  
(modified after loading)

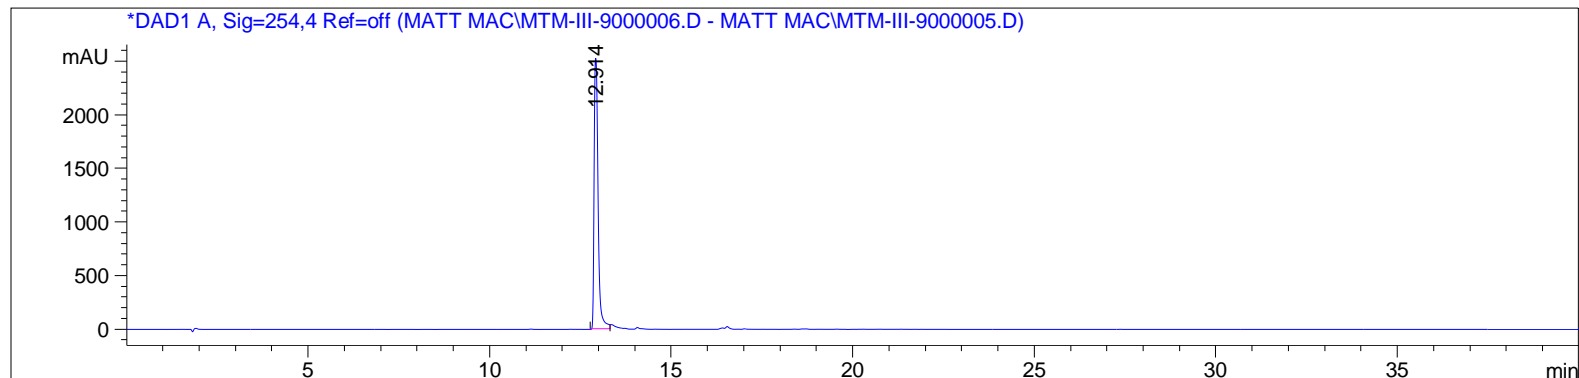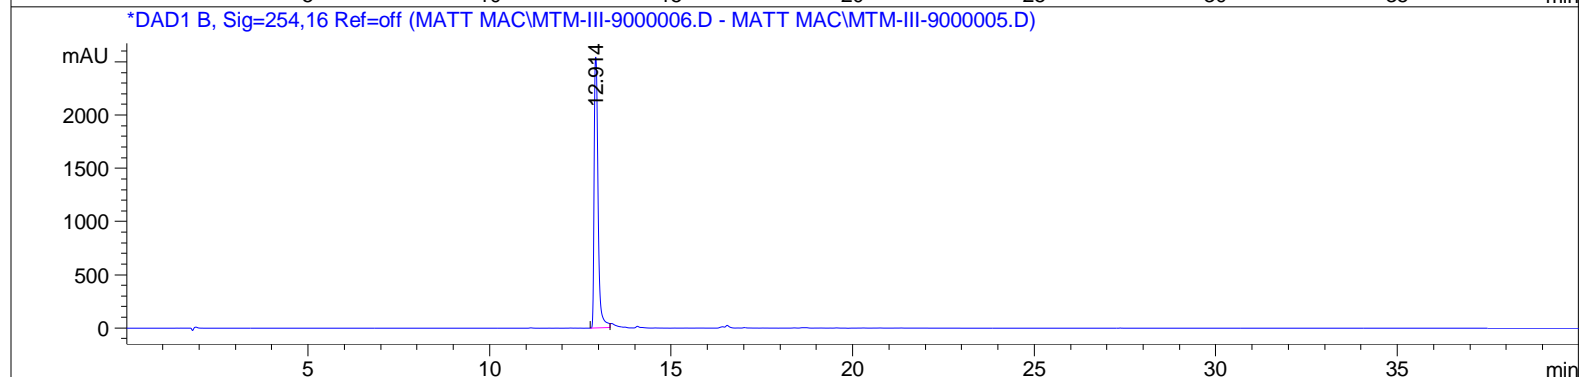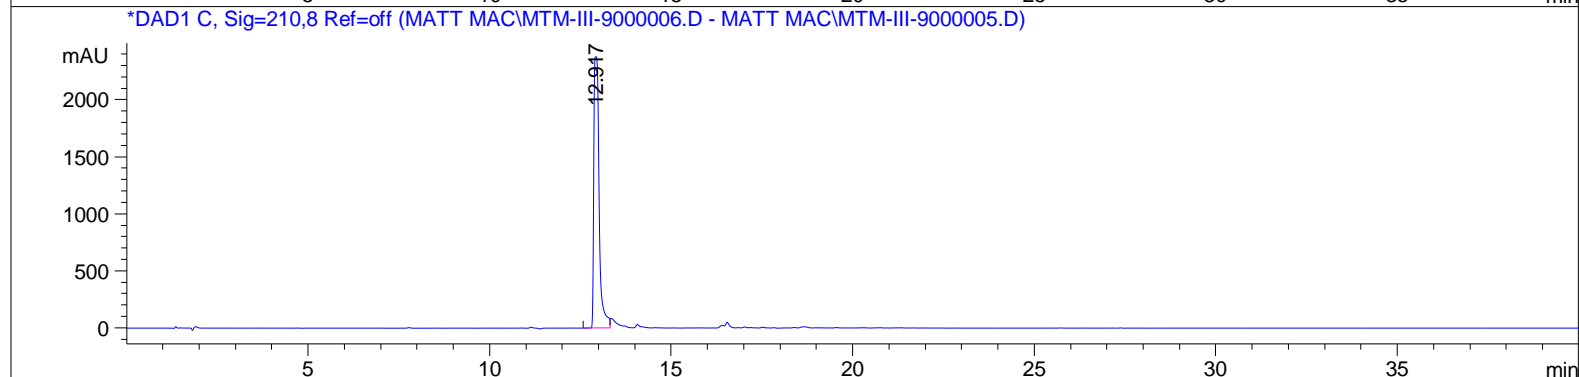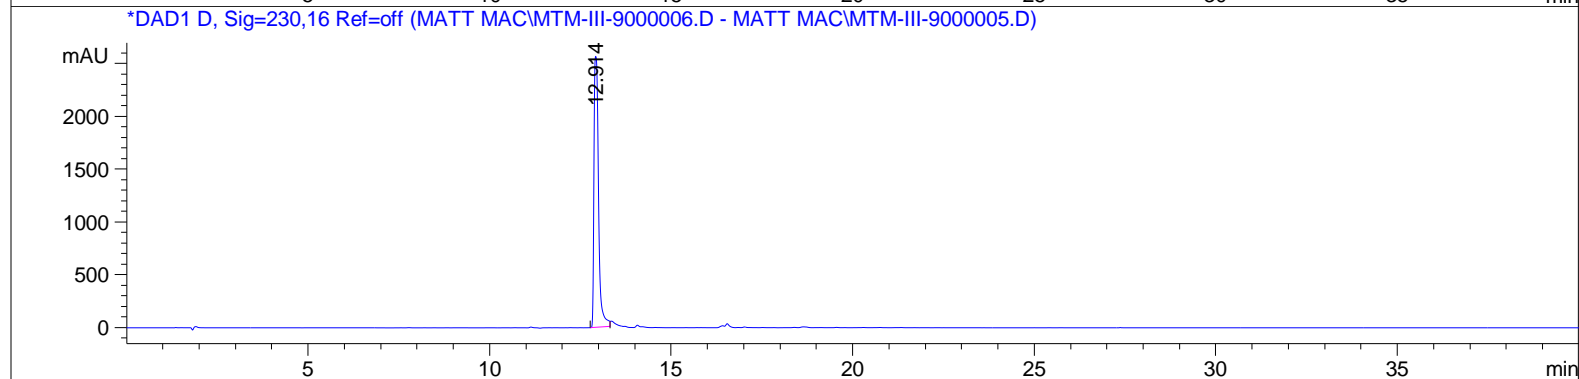

## HPLC traces of compound 29

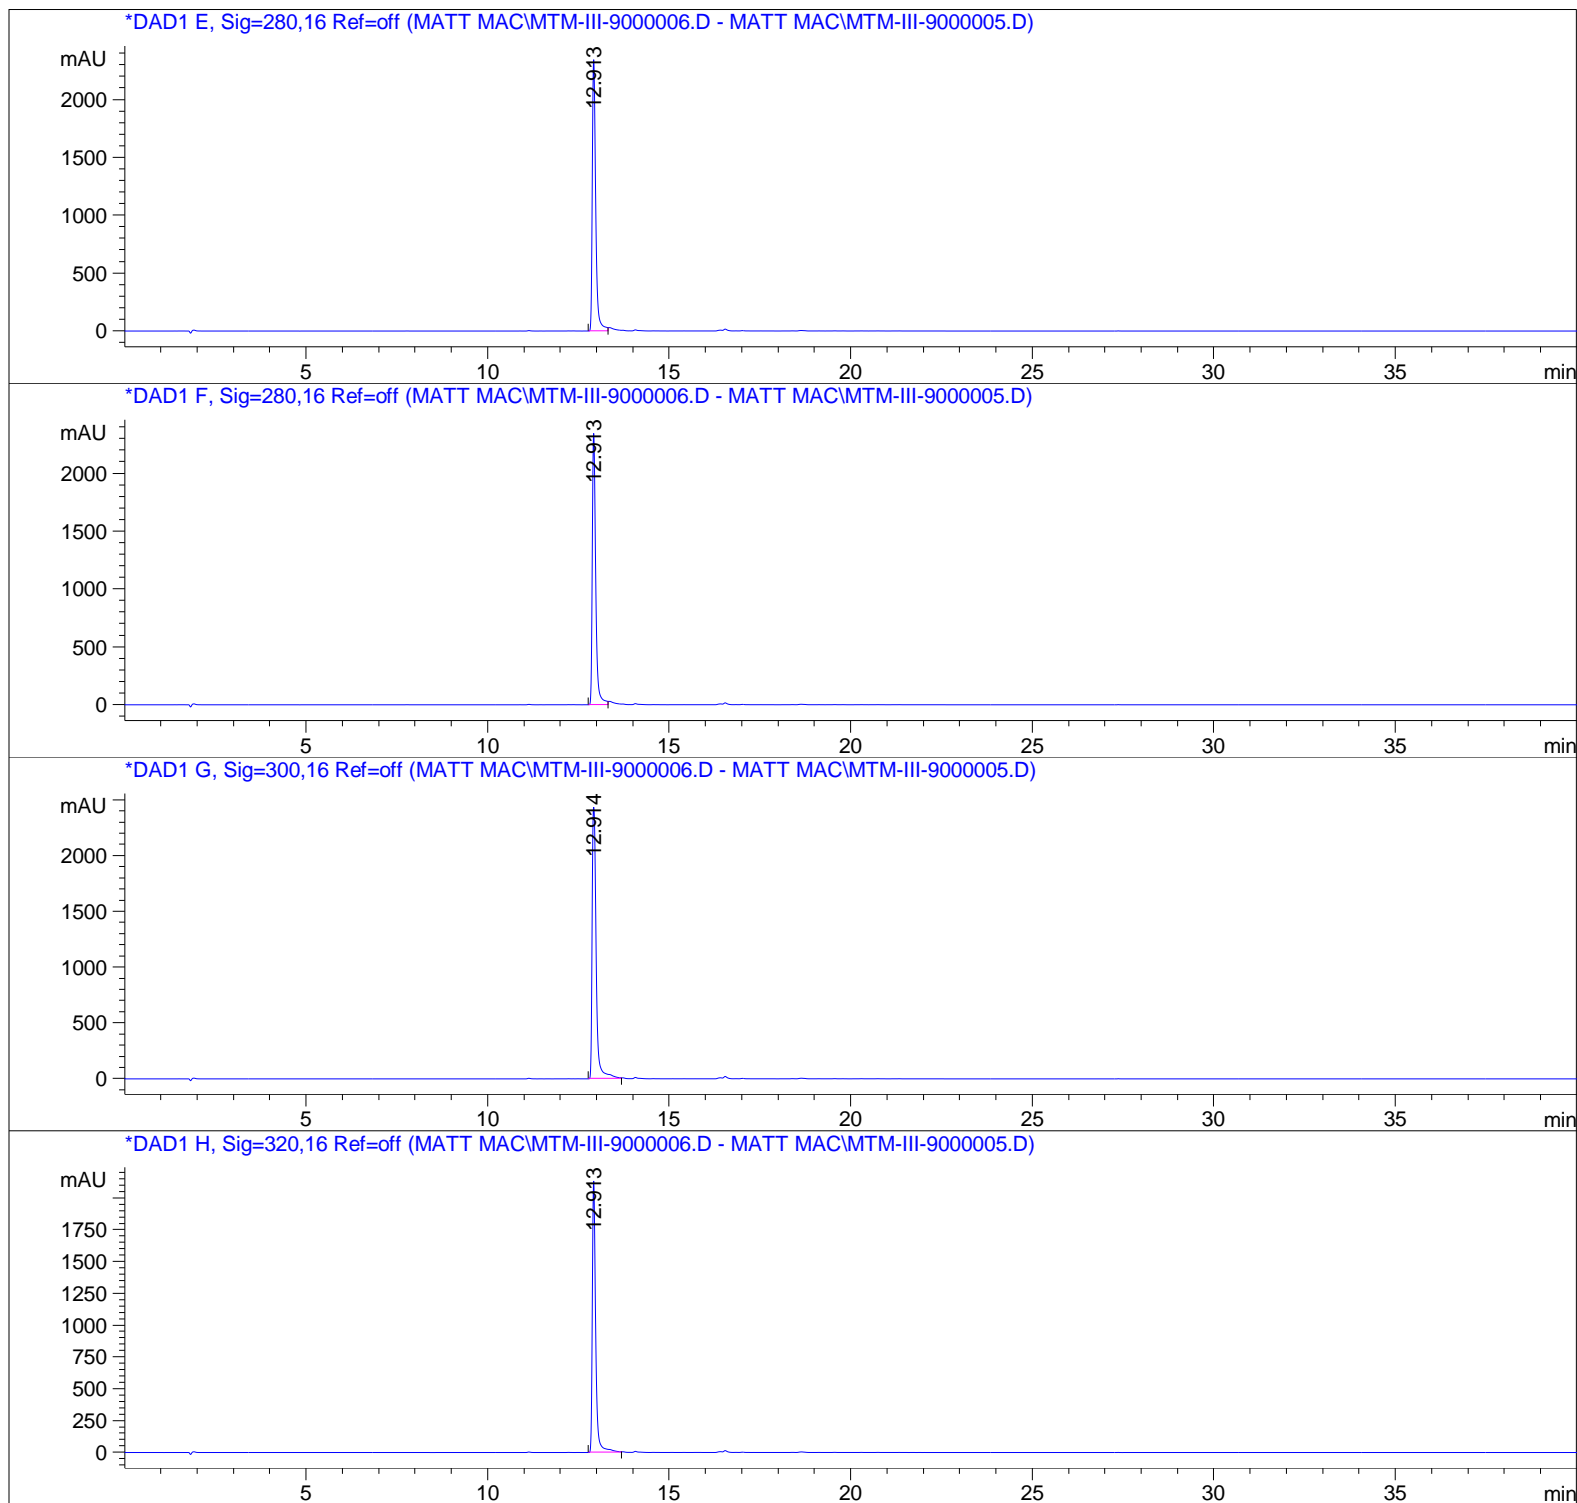=====  
Area Percent Report  
=====

Sorted By : Signal  
Multiplier : 1.0000  
Dilution : 1.0000  
Use Multiplier & Dilution Factor with ISTDs

Sample Name: run1

## HPLC traces of compound 29

Signal 1: DAD1 A, Sig=254,4 Ref=off

Signal has been modified after loading from rawdata file!

| Peak # | RetTime [min] | Type | Width [min] | Area [mAU*s] | Height [mAU] | Area %   |
|--------|---------------|------|-------------|--------------|--------------|----------|
| 1      | 12.914        | BV   | 0.1192      | 1.93264e4    | 2528.52637   | 100.0000 |

Totals : 1.93264e4 2528.52637

Signal 2: DAD1 B, Sig=254,16 Ref=off

Signal has been modified after loading from rawdata file!

| Peak # | RetTime [min] | Type | Width [min] | Area [mAU*s] | Height [mAU] | Area %   |
|--------|---------------|------|-------------|--------------|--------------|----------|
| 1      | 12.914        | BV   | 0.1185      | 1.93178e4    | 2547.96143   | 100.0000 |

Totals : 1.93178e4 2547.96143

Signal 3: DAD1 C, Sig=210,8 Ref=off

Signal has been modified after loading from rawdata file!

| Peak # | RetTime [min] | Type | Width [min] | Area [mAU*s] | Height [mAU] | Area %   |
|--------|---------------|------|-------------|--------------|--------------|----------|
| 1      | 12.917        | BV   | 0.1595      | 2.43604e4    | 2378.69629   | 100.0000 |

Totals : 2.43604e4 2378.69629

Signal 4: DAD1 D, Sig=230,16 Ref=off

Signal has been modified after loading from rawdata file!

| Peak # | RetTime [min] | Type | Width [min] | Area [mAU*s] | Height [mAU] | Area %   |
|--------|---------------|------|-------------|--------------|--------------|----------|
| 1      | 12.914        | BV   | 0.1364      | 2.25143e4    | 2565.28882   | 100.0000 |

Totals : 2.25143e4 2565.28882

Sample Name: run1

## HPLC traces of compound 29

Signal 5: DAD1 E, Sig=280,16 Ref=off

Signal has been modified after loading from rawdata file!

| Peak # | RetTime [min] | Type | Width [min] | Area [mAU*s] | Height [mAU] | Area %   |
|--------|---------------|------|-------------|--------------|--------------|----------|
| 1      | 12.913        | BV   | 0.1006      | 1.53996e4    | 2346.69971   | 100.0000 |

Totals : 1.53996e4 2346.69971

Signal 6: DAD1 F, Sig=280,16 Ref=off

Signal has been modified after loading from rawdata file!

| Peak # | RetTime [min] | Type | Width [min] | Area [mAU*s] | Height [mAU] | Area %   |
|--------|---------------|------|-------------|--------------|--------------|----------|
| 1      | 12.913        | BV   | 0.1006      | 1.53996e4    | 2346.69971   | 100.0000 |

Totals : 1.53996e4 2346.69971

Signal 7: DAD1 G, Sig=300,16 Ref=off

Signal has been modified after loading from rawdata file!

| Peak # | RetTime [min] | Type | Width [min] | Area [mAU*s] | Height [mAU] | Area %   |
|--------|---------------|------|-------------|--------------|--------------|----------|
| 1      | 12.914        | BV   | 0.1206      | 1.89096e4    | 2435.48779   | 100.0000 |

Totals : 1.89096e4 2435.48779

Signal 8: DAD1 H, Sig=320,16 Ref=off

Signal has been modified after loading from rawdata file!

| Peak # | RetTime [min] | Type | Width [min] | Area [mAU*s] | Height [mAU] | Area %   |
|--------|---------------|------|-------------|--------------|--------------|----------|
| 1      | 12.913        | BV   | 0.0976      | 1.38327e4    | 2135.87988   | 100.0000 |

Totals : 1.38327e4 2135.87988

\*\*\* End of Report \*\*\*

# HRMS of compound 29

C:\Xcalibur\...MTM-III-90\_+ESI

2/10/2013 10:32:12 AM

MTM-III-90

MTM-III-90\_+ESI #20 RT: 0.15 AV: 1 NL: 2.27E8

T: FTMS + p ESI Full ms [200.00-2000.00]

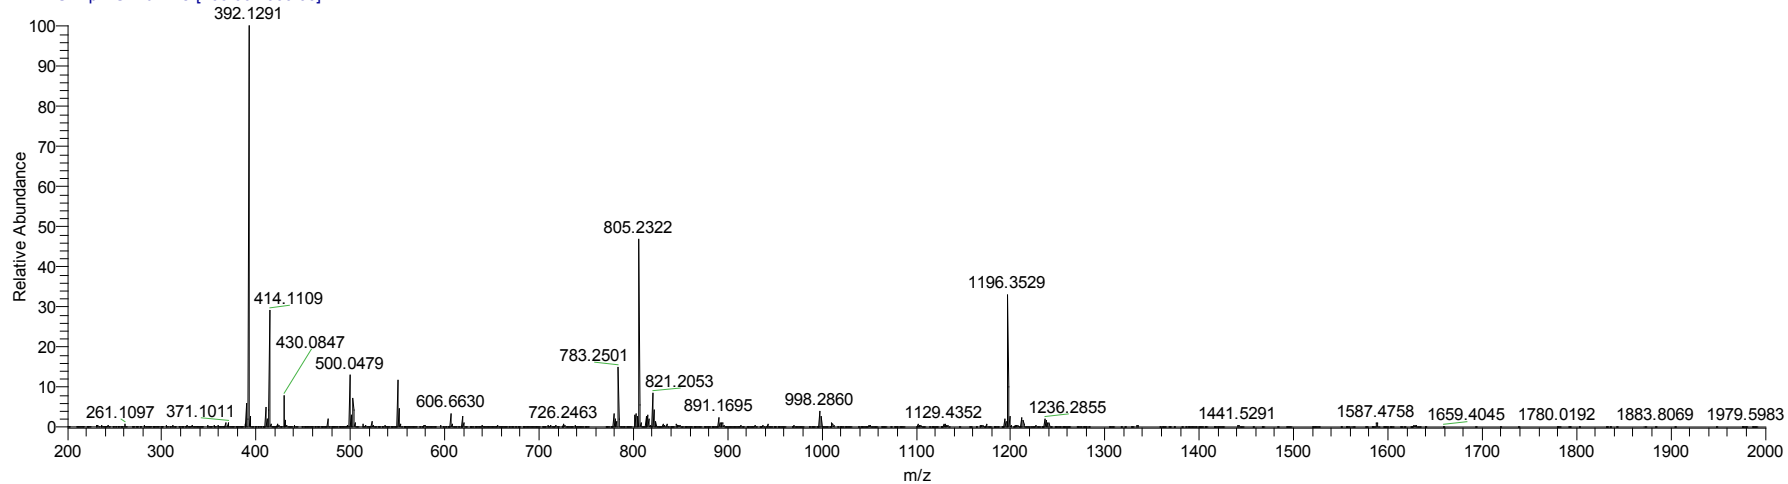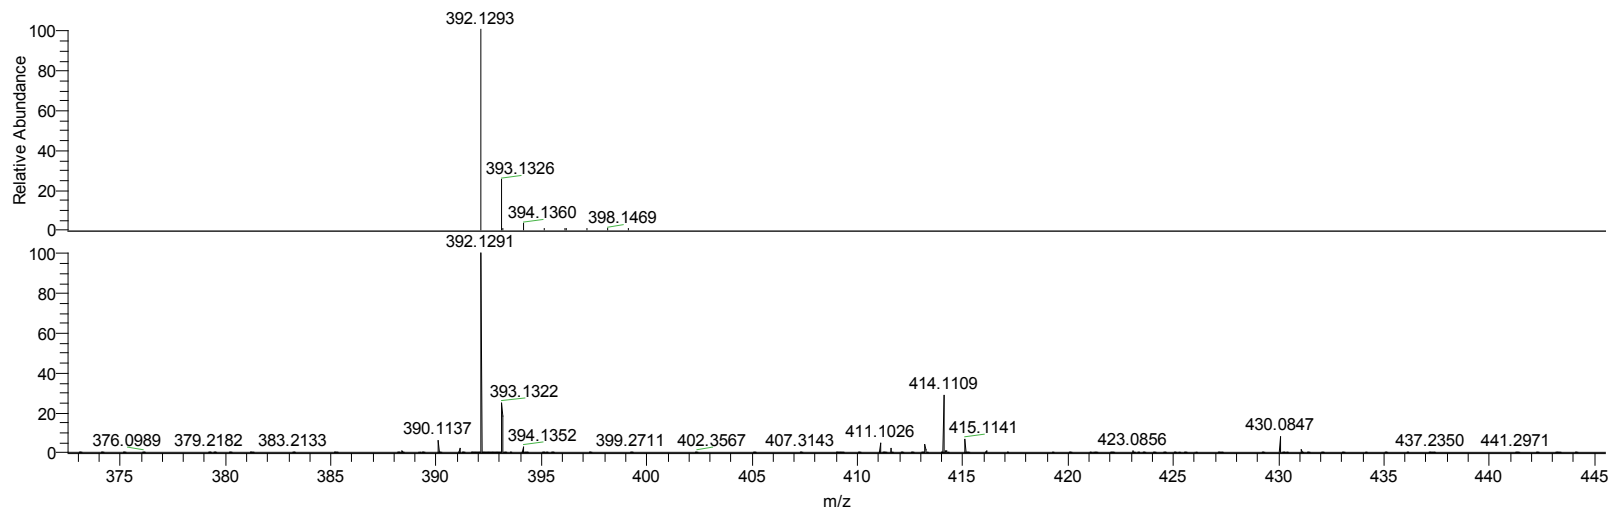

NL:  
7.69E5  
C<sub>23</sub>H<sub>19</sub>O<sub>4</sub>NF:  
C<sub>23</sub>H<sub>19</sub>O<sub>4</sub>N<sub>1</sub>F<sub>1</sub>  
pa Chrg 1

NL:  
2.27E8  
MTM-III-90\_+ESI#20  
RT: 0.15 AV: 1 T:  
FTMS + p ESI Full  
ms [200.00-2000.00]



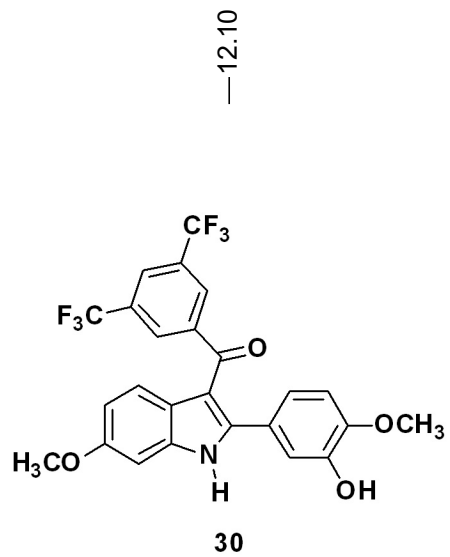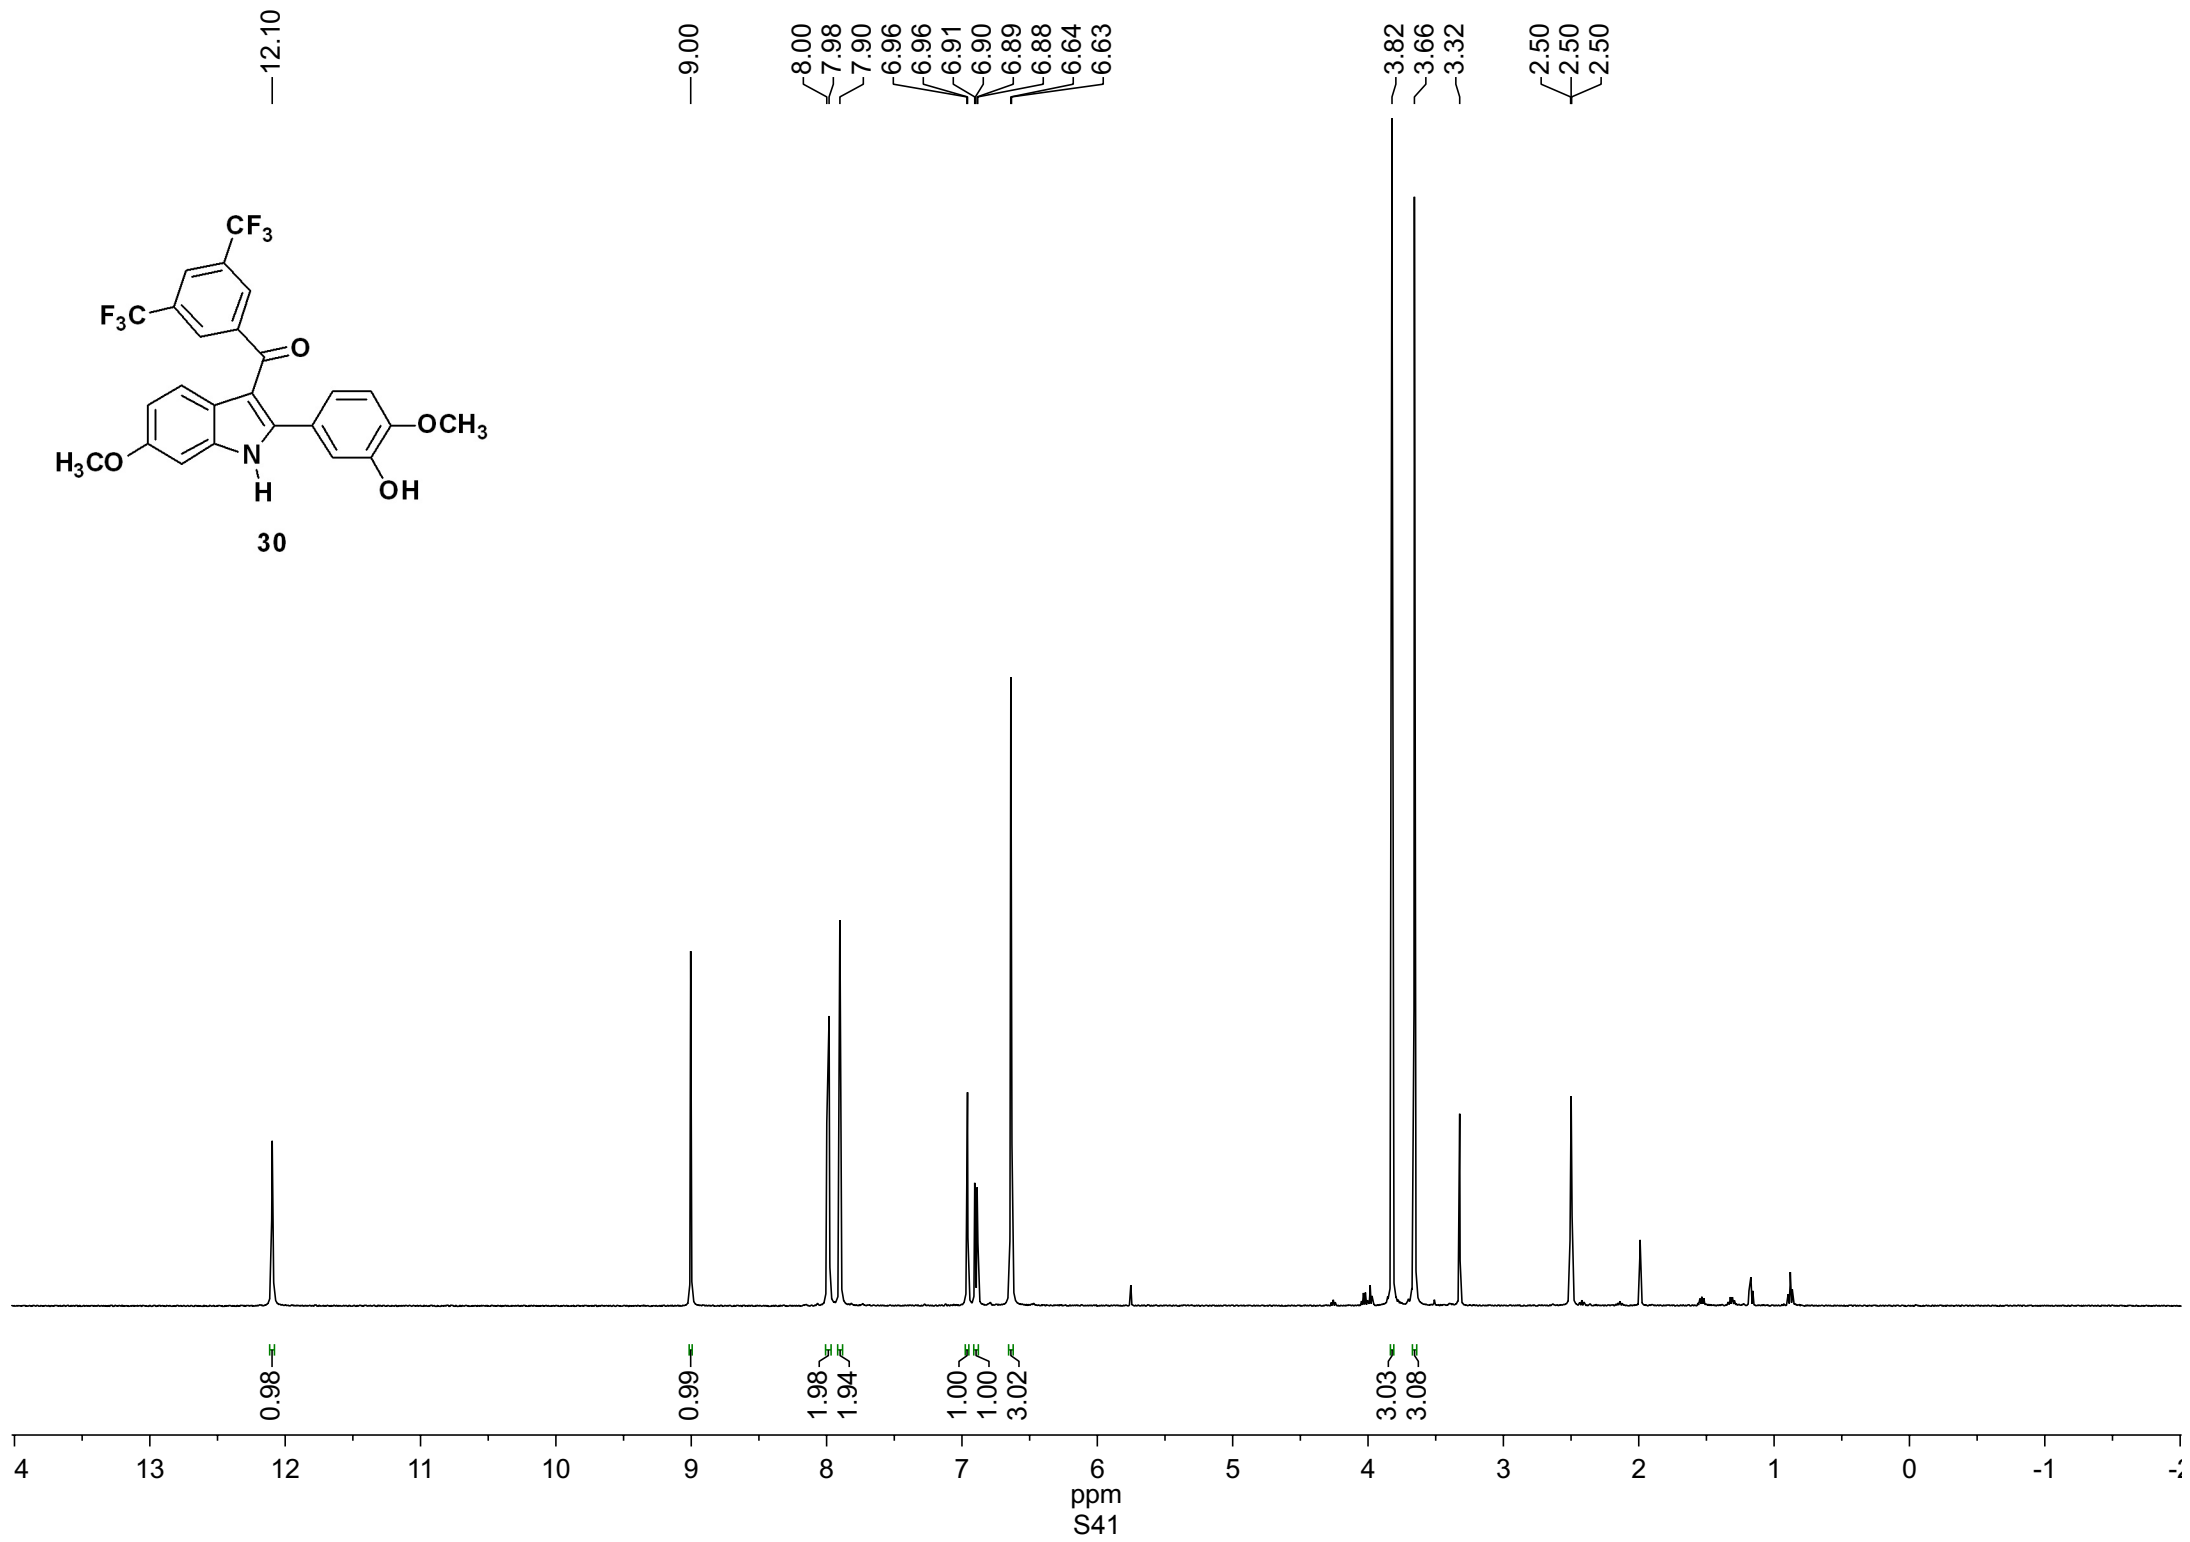

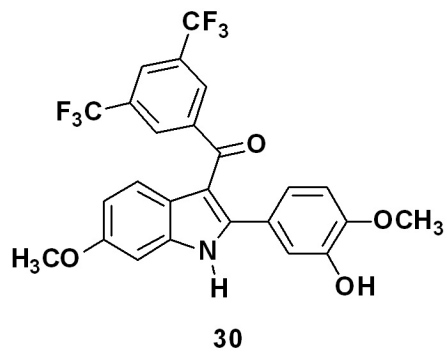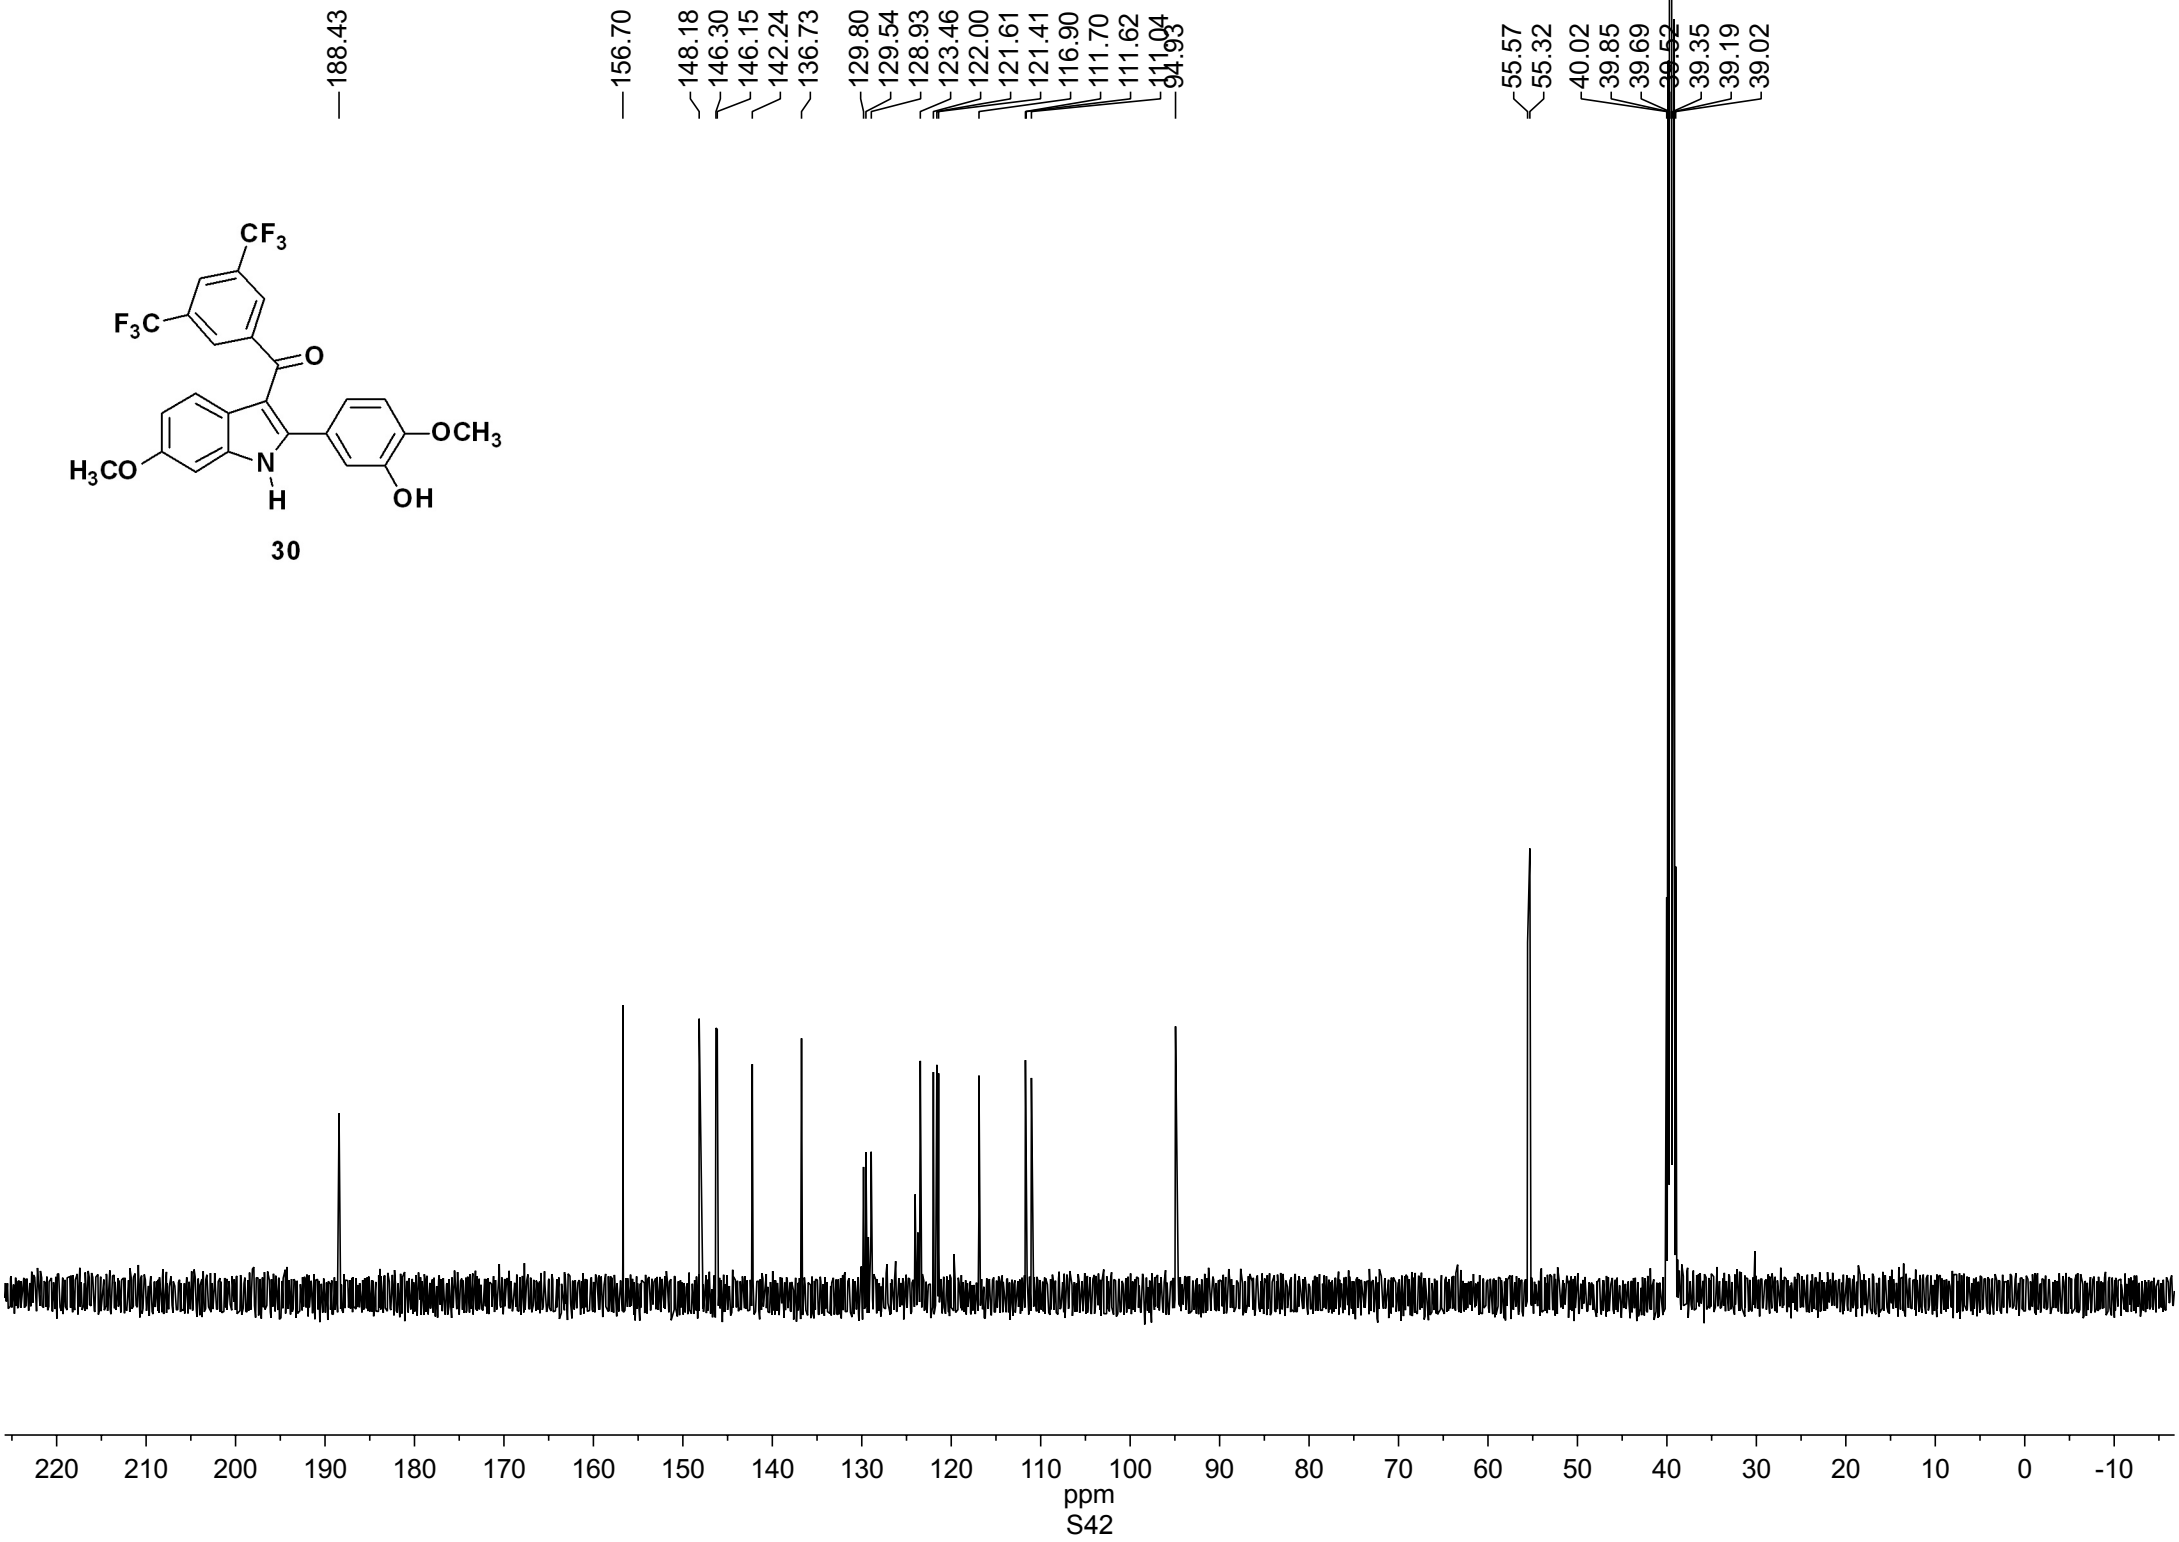

—61.41

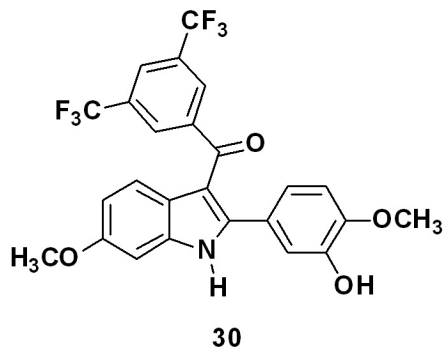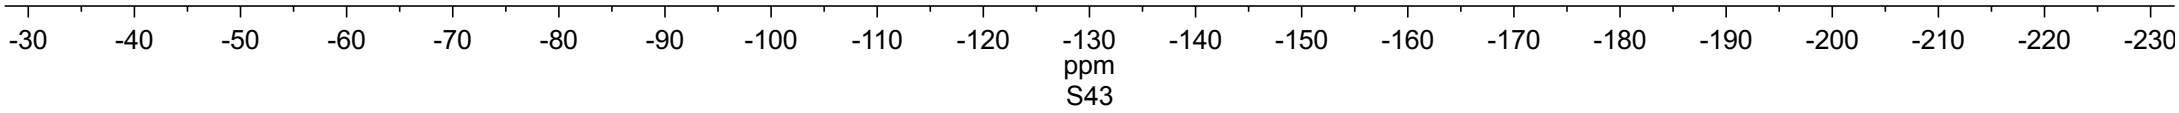

Sample Name: run1

### HPLC traces of compound 30

=====

Acq. Operator : Matt Mac  
Acq. Instrument : Instrument 1 Location : -  
Injection Date : 1/9/2013 3:45:45 PM  
Acq. Method : C:\CHEM32\1\METHODS\MASTERMETHOD.M  
Last changed : 1/9/2013 2:59:47 PM by Matt Mac  
Analysis Method : C:\CHEM32\1\METHODS\MASTERMETHOD.M  
Last changed : 1/9/2013 2:04:11 PM by Matt Mac  
(modified after loading)

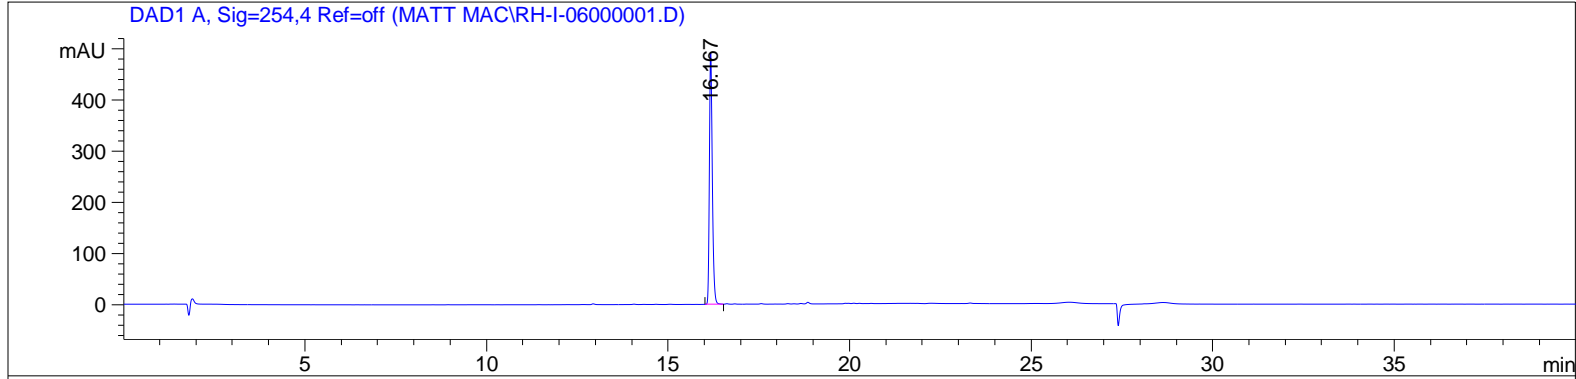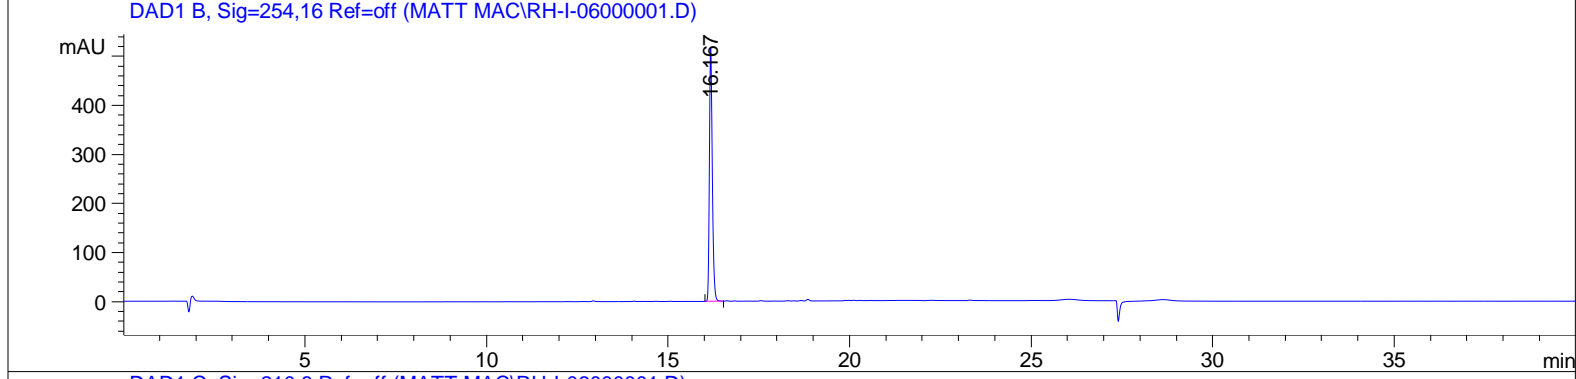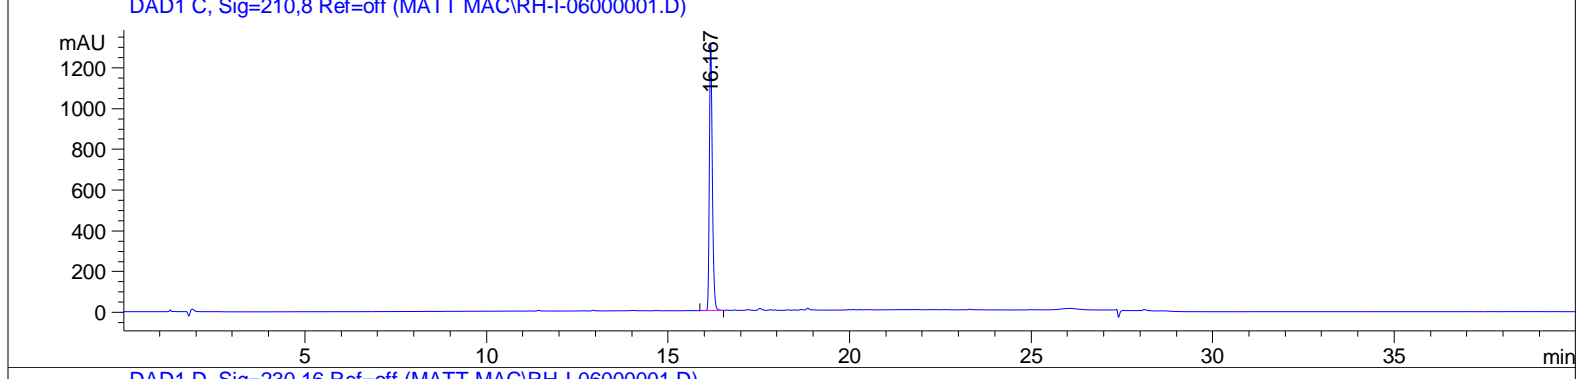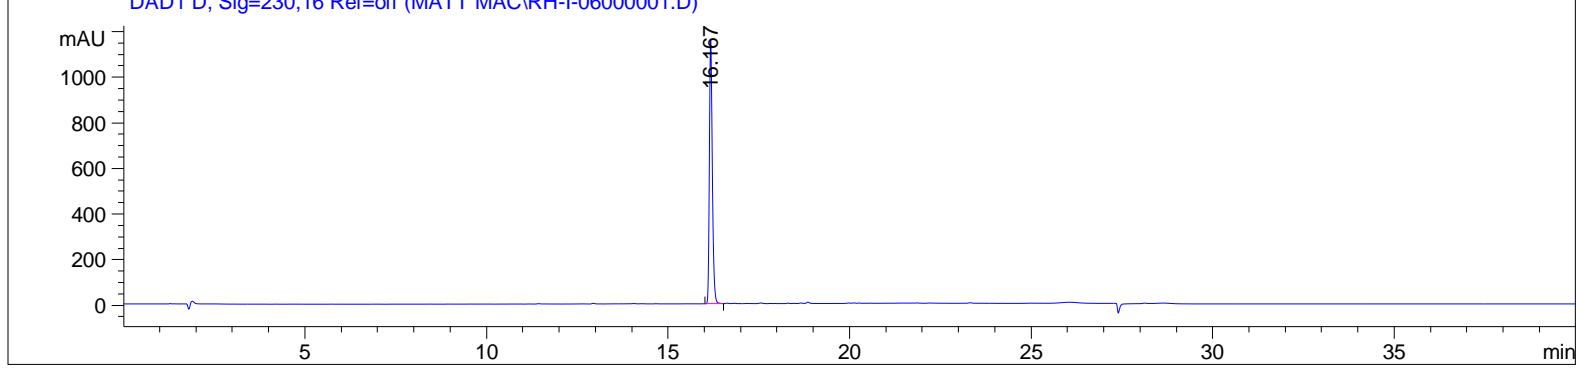

### HPLC traces of compound 30

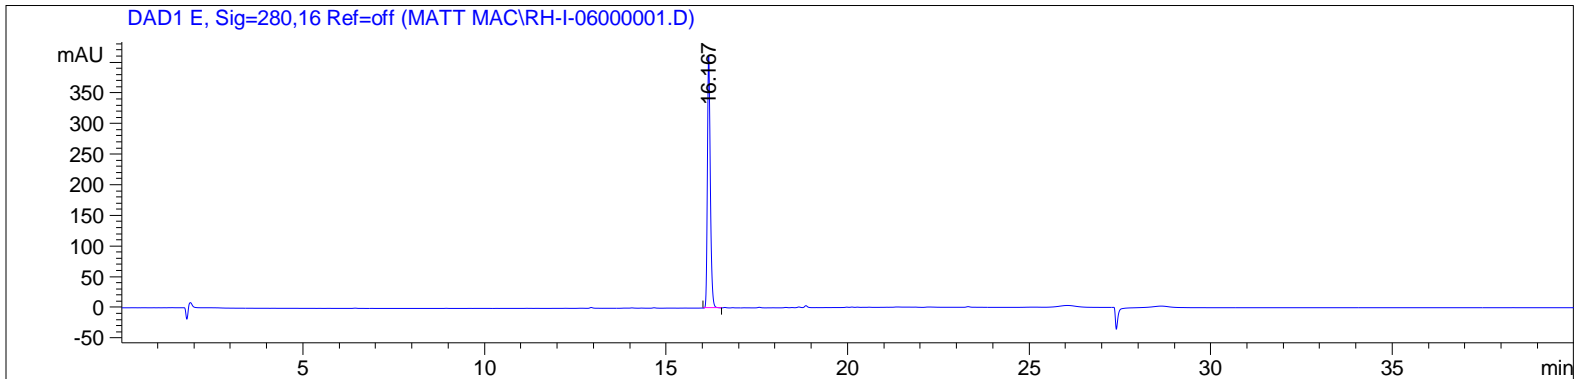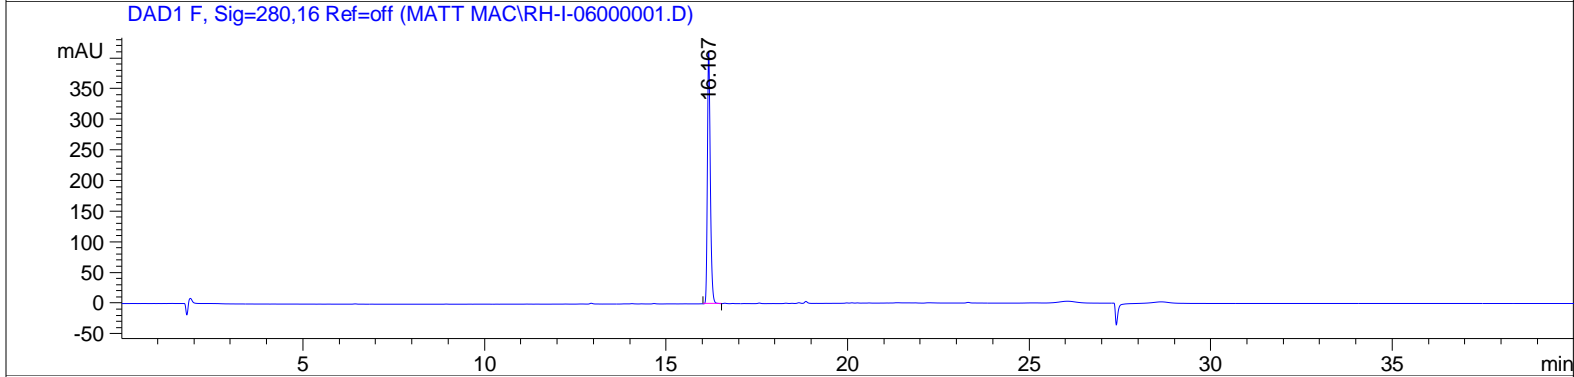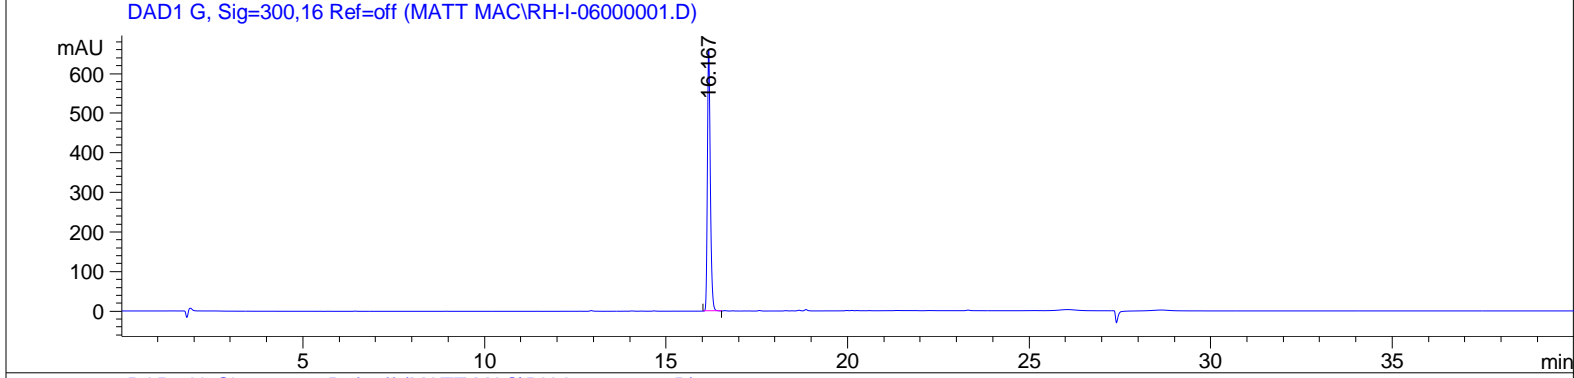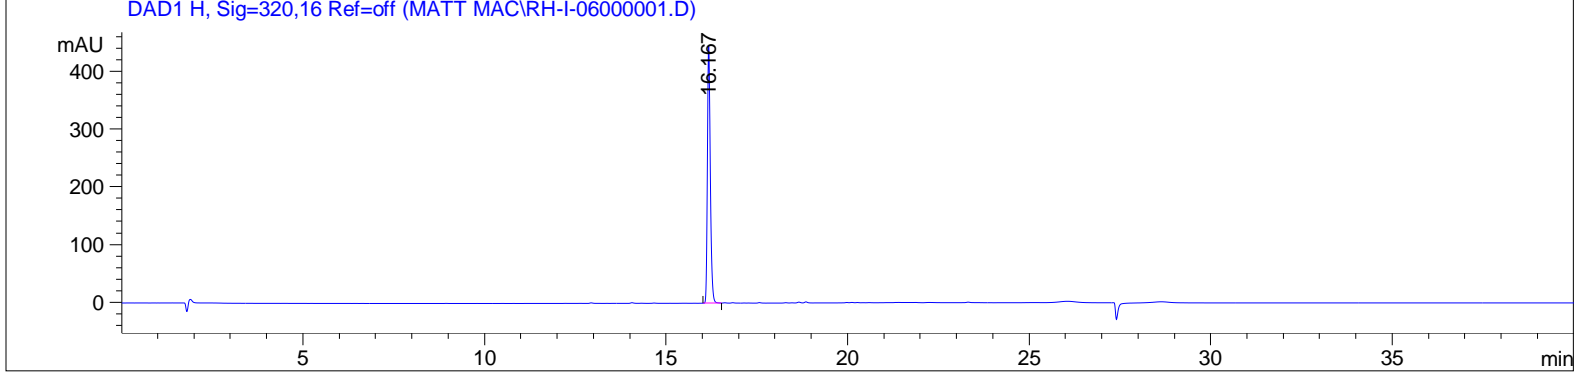

=====  
Area Percent Report  
=====

Sorted By : Signal  
Multiplier : 1.0000  
Dilution : 1.0000  
Use Multiplier & Dilution Factor with ISTDs

### HPLC traces of compound 30

Signal 1: DAD1 A, Sig=254,4 Ref=off

| Peak # | RetTime [min] | Type | Width [min] | Area [mAU*s] | Height [mAU] | Area %   |
|--------|---------------|------|-------------|--------------|--------------|----------|
| 1      | 16.167        | BV   | 0.0852      | 2759.49121   | 493.87103    | 100.0000 |

Totals : 2759.49121 493.87103

Signal 2: DAD1 B, Sig=254,16 Ref=off

| Peak # | RetTime [min] | Type | Width [min] | Area [mAU*s] | Height [mAU] | Area %   |
|--------|---------------|------|-------------|--------------|--------------|----------|
| 1      | 16.167        | BV   | 0.0852      | 2894.88745   | 518.10498    | 100.0000 |

Totals : 2894.88745 518.10498

Signal 3: DAD1 C, Sig=210,8 Ref=off

| Peak # | RetTime [min] | Type | Width [min] | Area [mAU*s] | Height [mAU] | Area %   |
|--------|---------------|------|-------------|--------------|--------------|----------|
| 1      | 16.167        | BV   | 0.0860      | 7422.78369   | 1312.45374   | 100.0000 |

Totals : 7422.78369 1312.45374

Signal 4: DAD1 D, Sig=230,16 Ref=off

| Peak # | RetTime [min] | Type | Width [min] | Area [mAU*s] | Height [mAU] | Area %   |
|--------|---------------|------|-------------|--------------|--------------|----------|
| 1      | 16.167        | BV   | 0.0856      | 6530.87451   | 1161.71985   | 100.0000 |

Totals : 6530.87451 1161.71985

Signal 5: DAD1 E, Sig=280,16 Ref=off

| Peak # | RetTime [min] | Type | Width [min] | Area [mAU*s] | Height [mAU] | Area %   |
|--------|---------------|------|-------------|--------------|--------------|----------|
| 1      | 16.167        | BV   | 0.0851      | 2305.04321   | 413.06256    | 100.0000 |

Totals : 2305.04321 413.06256

Sample Name: run1

### HPLC traces of compound 30

Signal 6: DAD1 F, Sig=280,16 Ref=off

| Peak # | RetTime [min] | Type | Width [min] | Area [mAU*s] | Height [mAU] | Area %   |
|--------|---------------|------|-------------|--------------|--------------|----------|
| 1      | 16.167        | BV   | 0.0851      | 2305.04321   | 413.06256    | 100.0000 |

Totals : 2305.04321 413.06256

Signal 7: DAD1 G, Sig=300,16 Ref=off

| Peak # | RetTime [min] | Type | Width [min] | Area [mAU*s] | Height [mAU] | Area %   |
|--------|---------------|------|-------------|--------------|--------------|----------|
| 1      | 16.167        | BV   | 0.0852      | 3709.70337   | 663.46100    | 100.0000 |

Totals : 3709.70337 663.46100

Signal 8: DAD1 H, Sig=320,16 Ref=off

| Peak # | RetTime [min] | Type | Width [min] | Area [mAU*s] | Height [mAU] | Area %   |
|--------|---------------|------|-------------|--------------|--------------|----------|
| 1      | 16.167        | BV   | 0.0852      | 2500.62109   | 447.69040    | 100.0000 |

Totals : 2500.62109 447.69040

=====  
 \*\*\* End of Report \*\*\*

# HRMS of compound 30

C:\Xcalibur\...Matt\2-10-2013\RH-I-06

2/10/2013 3:37:45 PM

RH-I-06

RH-I-06 #14 RT: 0.14 AV: 1 NL: 1.05E7  
T: FTMS + p ESI Full ms [200.00-2000.00]

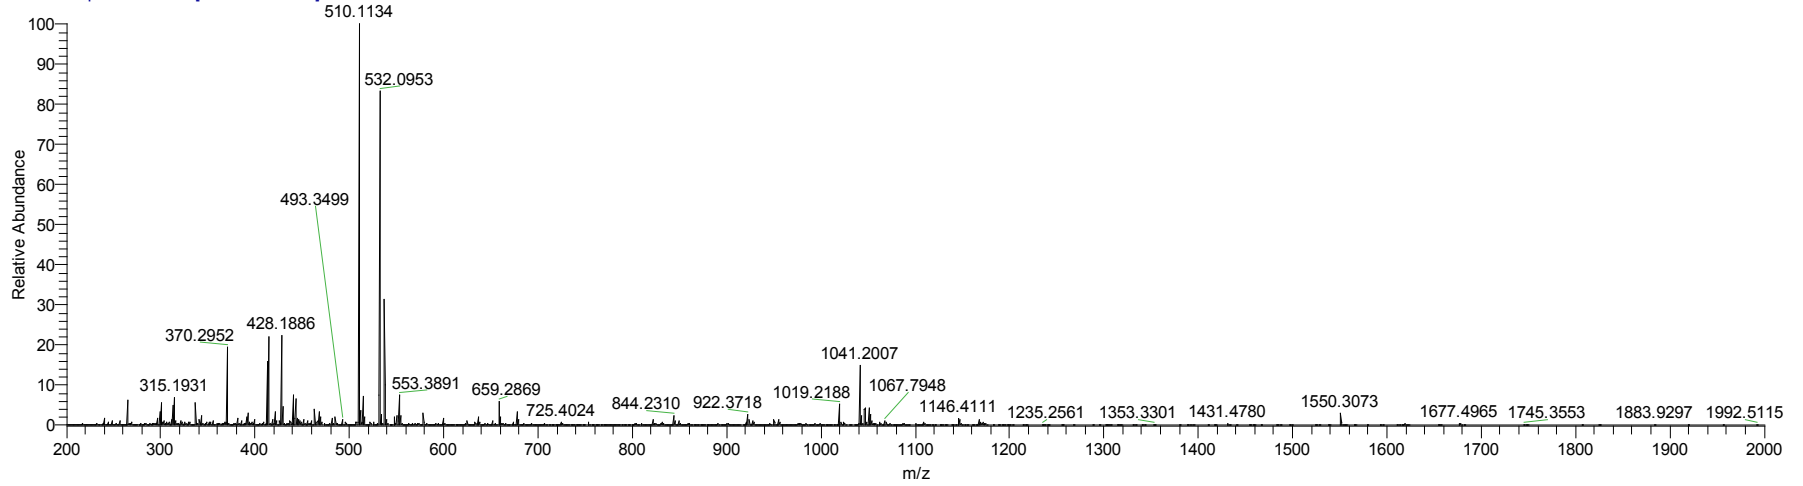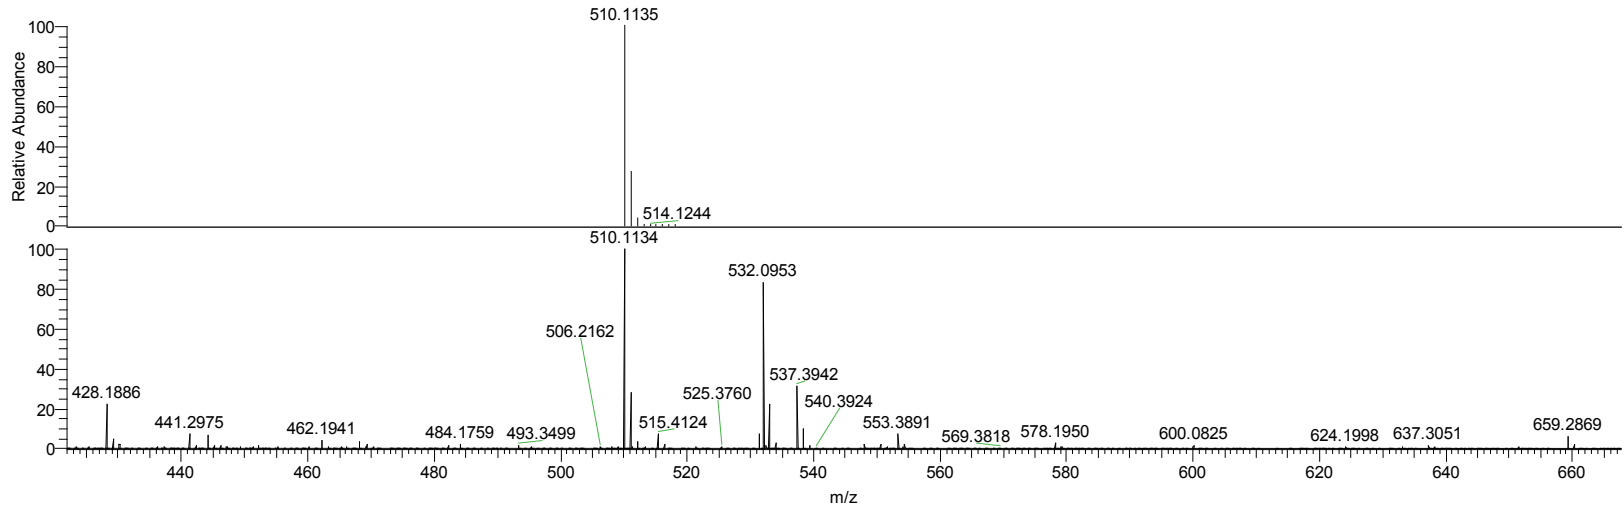

NL:  
7.52E5  
C<sub>25</sub>H<sub>18</sub>O<sub>4</sub>N<sub>1</sub>F<sub>6</sub>  
pa Chrg 1

NL:  
1.05E7  
RH-I-06#14 RT:  
0.14 AV: 1 T:  
FTMS + p ESI  
Full ms  
[200.00-2000.00]



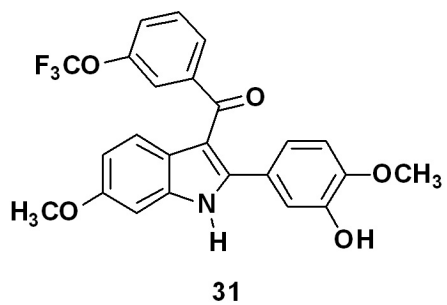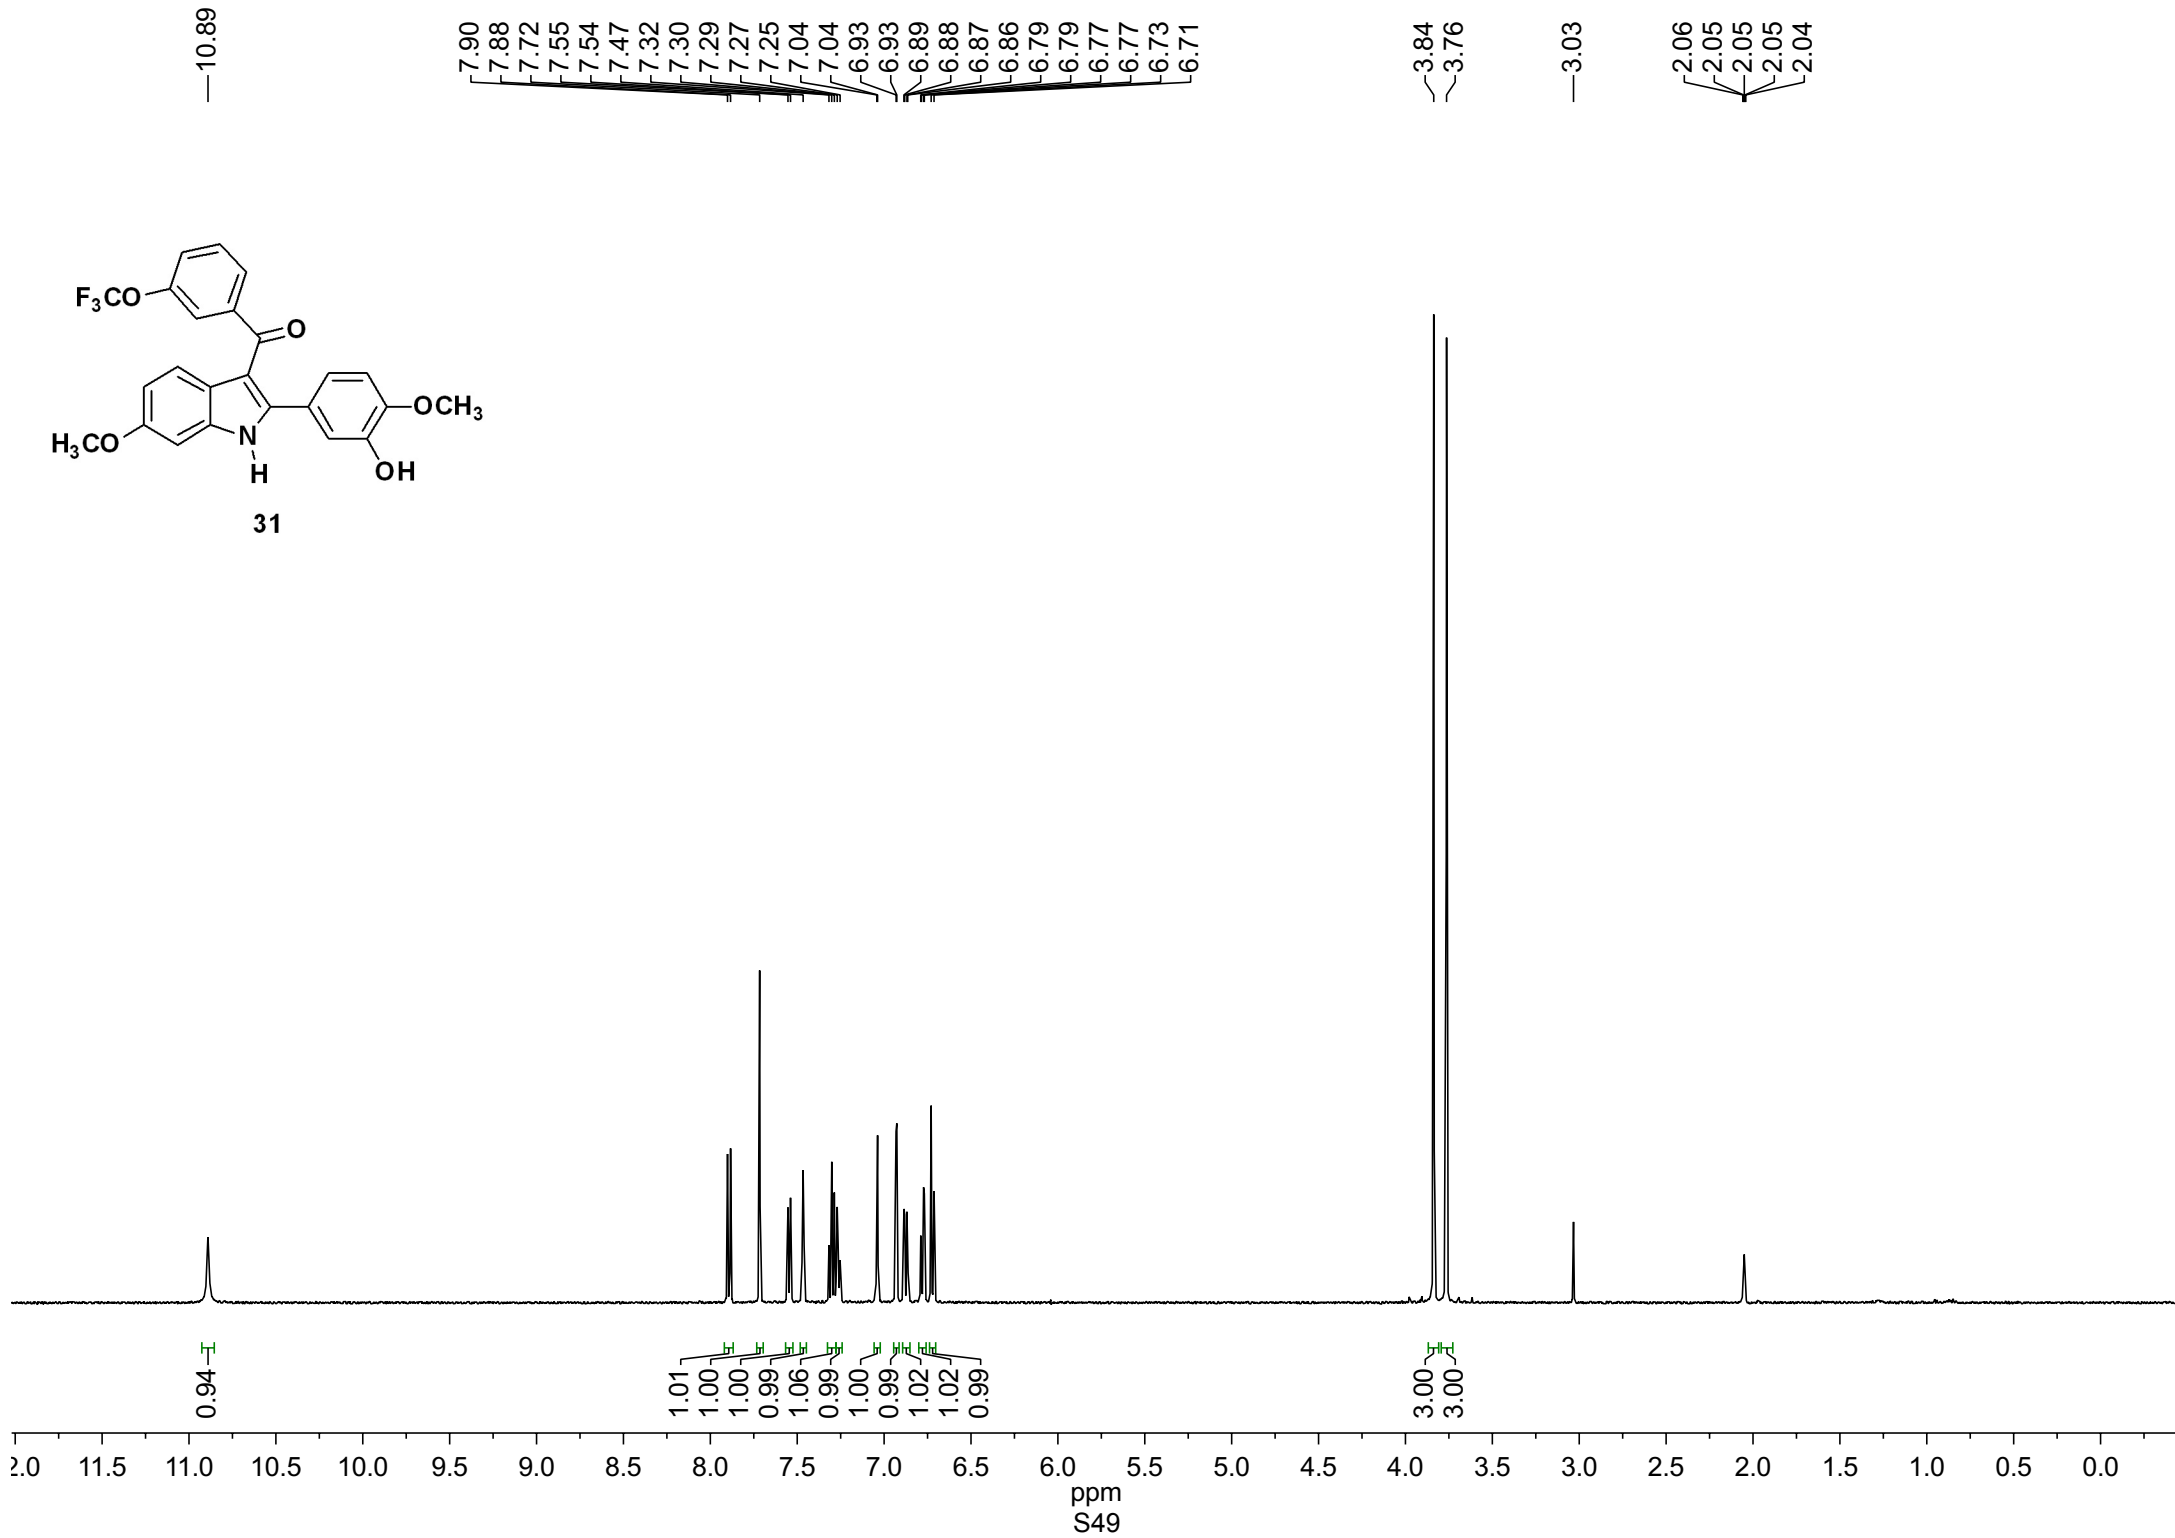

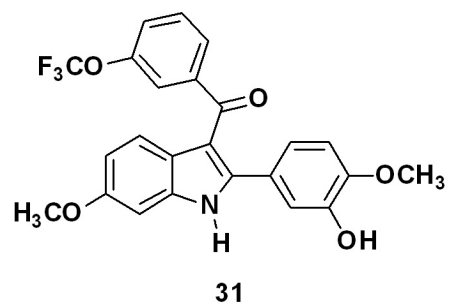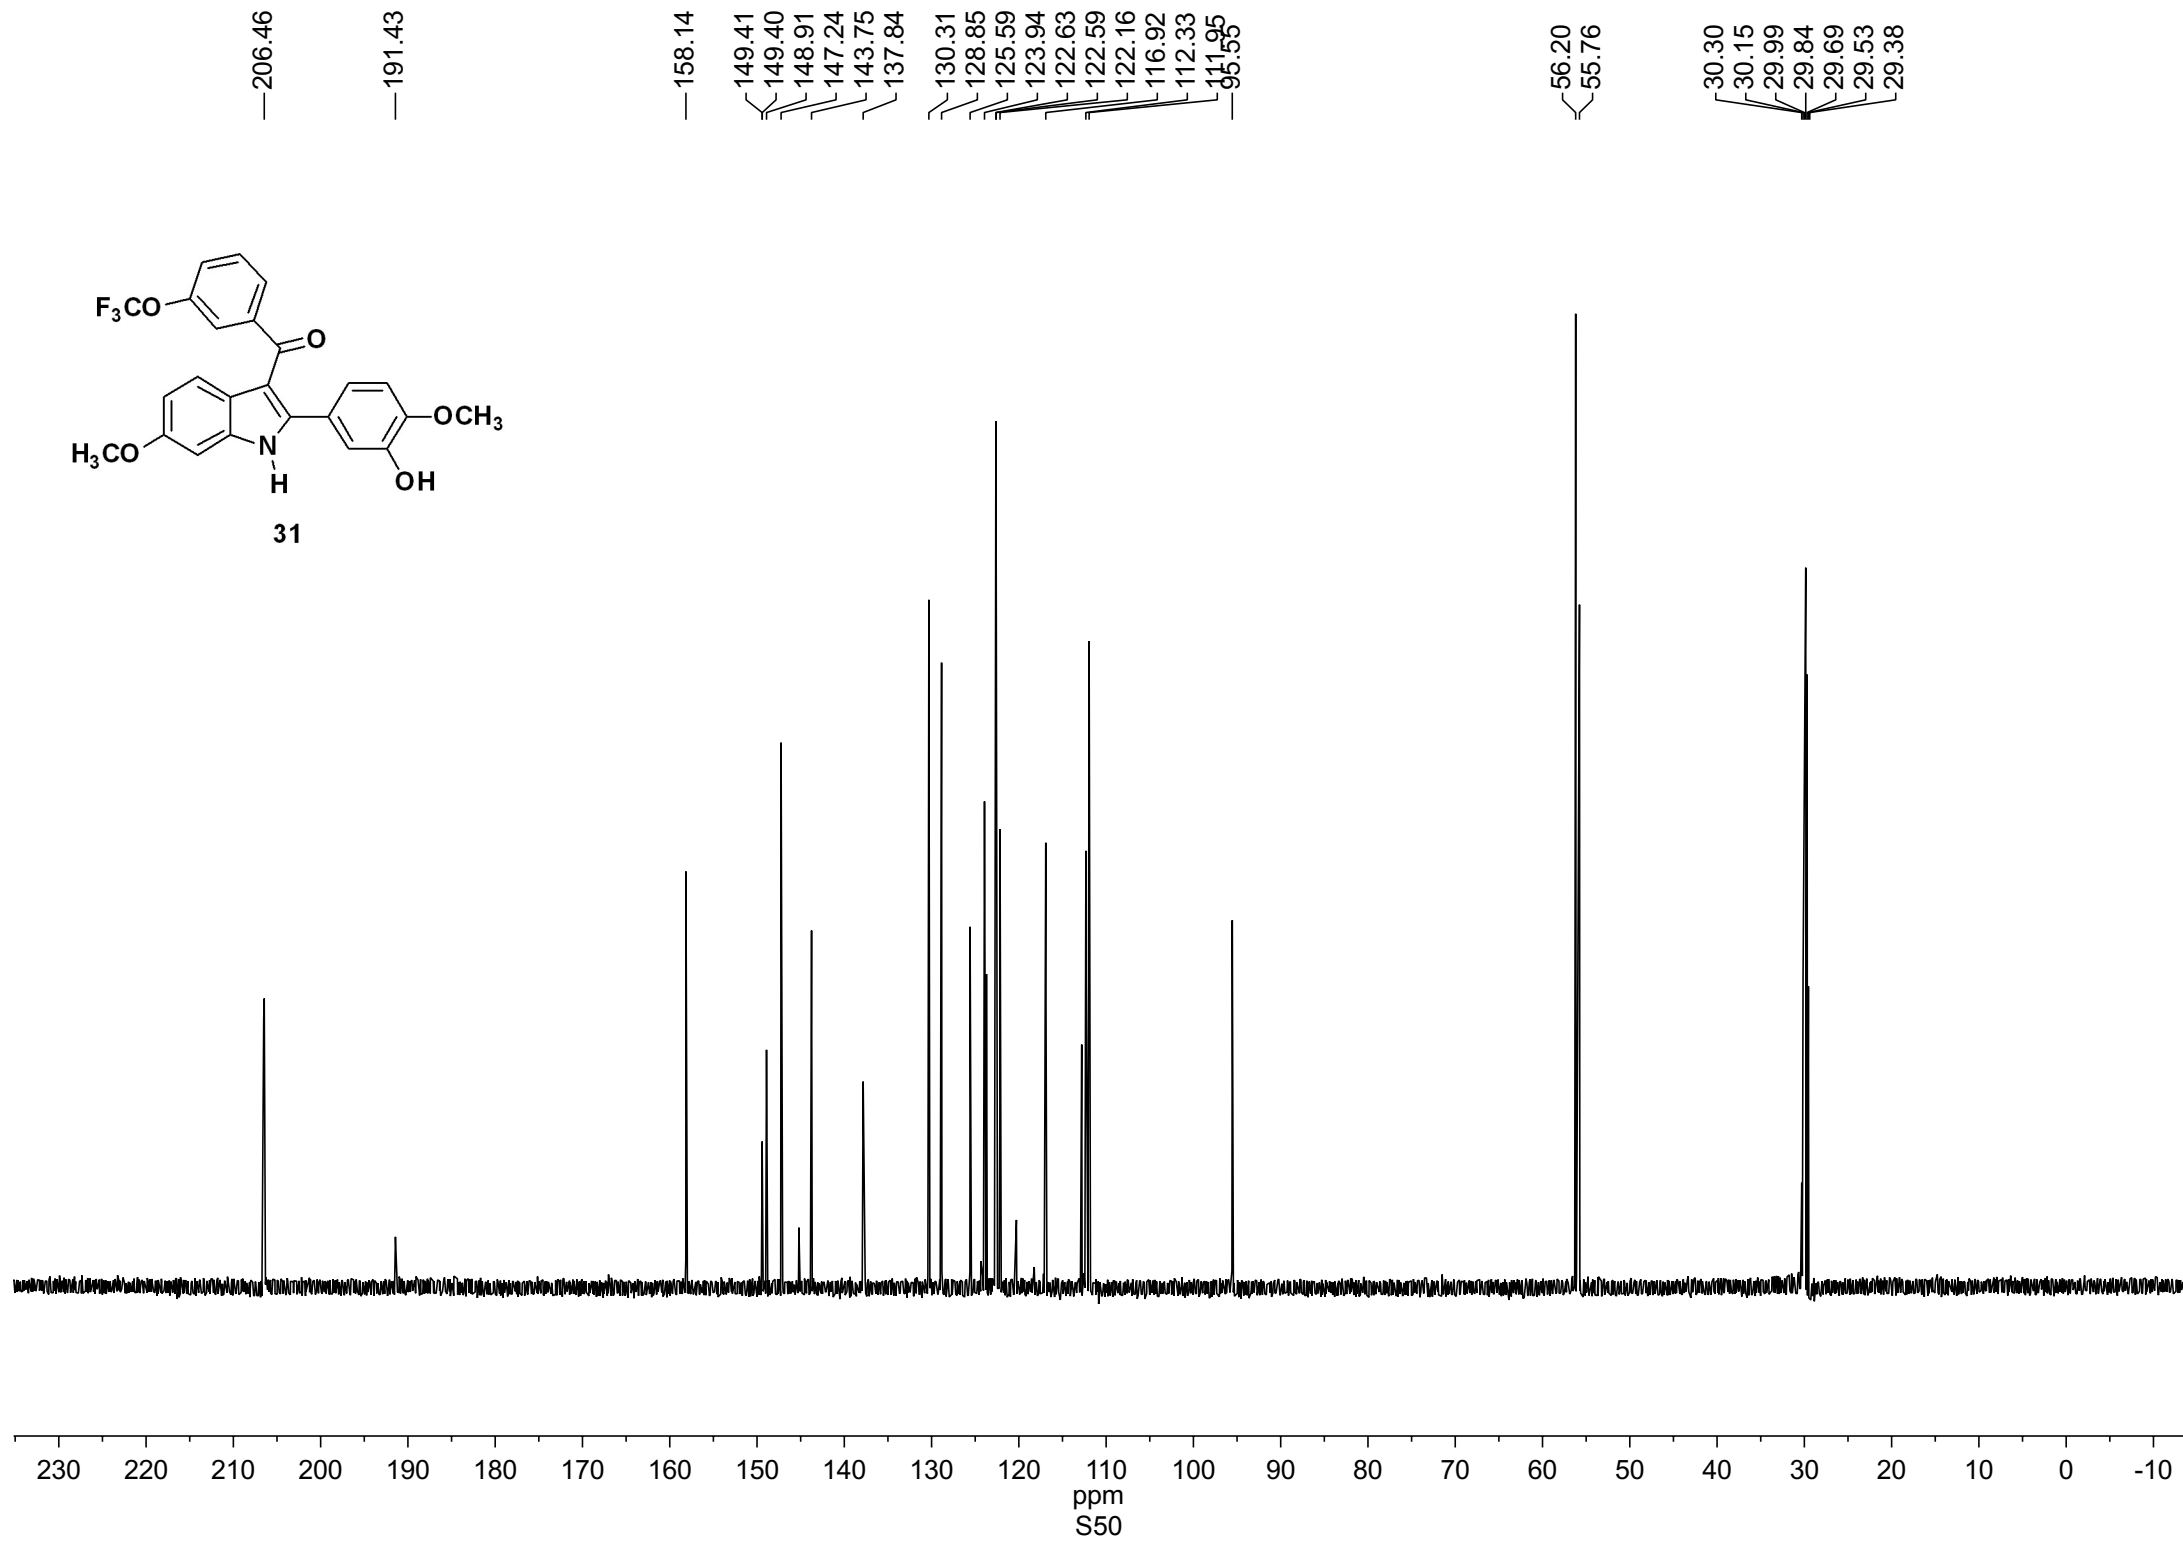

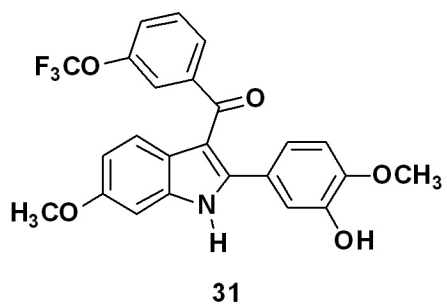

---58.50

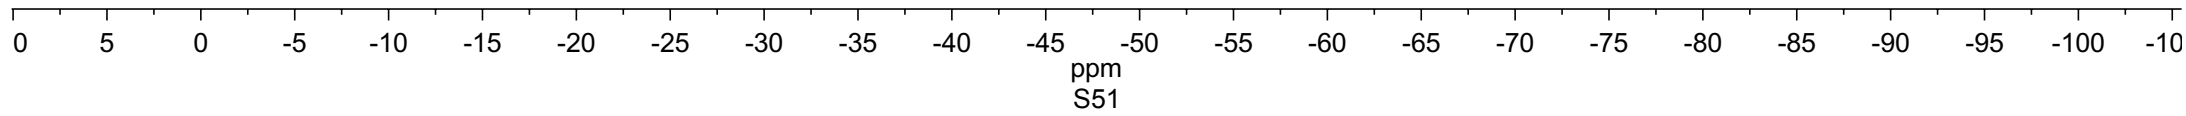

Sample Name: run1

## HPLC traces of compound 31

=====

Acq. Operator : Matt Mac  
Acq. Instrument : Instrument 1 Location : -  
Injection Date : 1/10/2013 10:51:03 AM  
Acq. Method : C:\CHEM32\1\METHODS\MASTERMETHOD.M  
Last changed : 1/10/2013 10:04:38 AM by Matt Mac  
(modified after loading)  
Analysis Method : C:\CHEM32\1\METHODS\MASTERMETHOD.M  
Last changed : 1/10/2013 10:52:42 AM by Matt Mac  
(modified after loading)

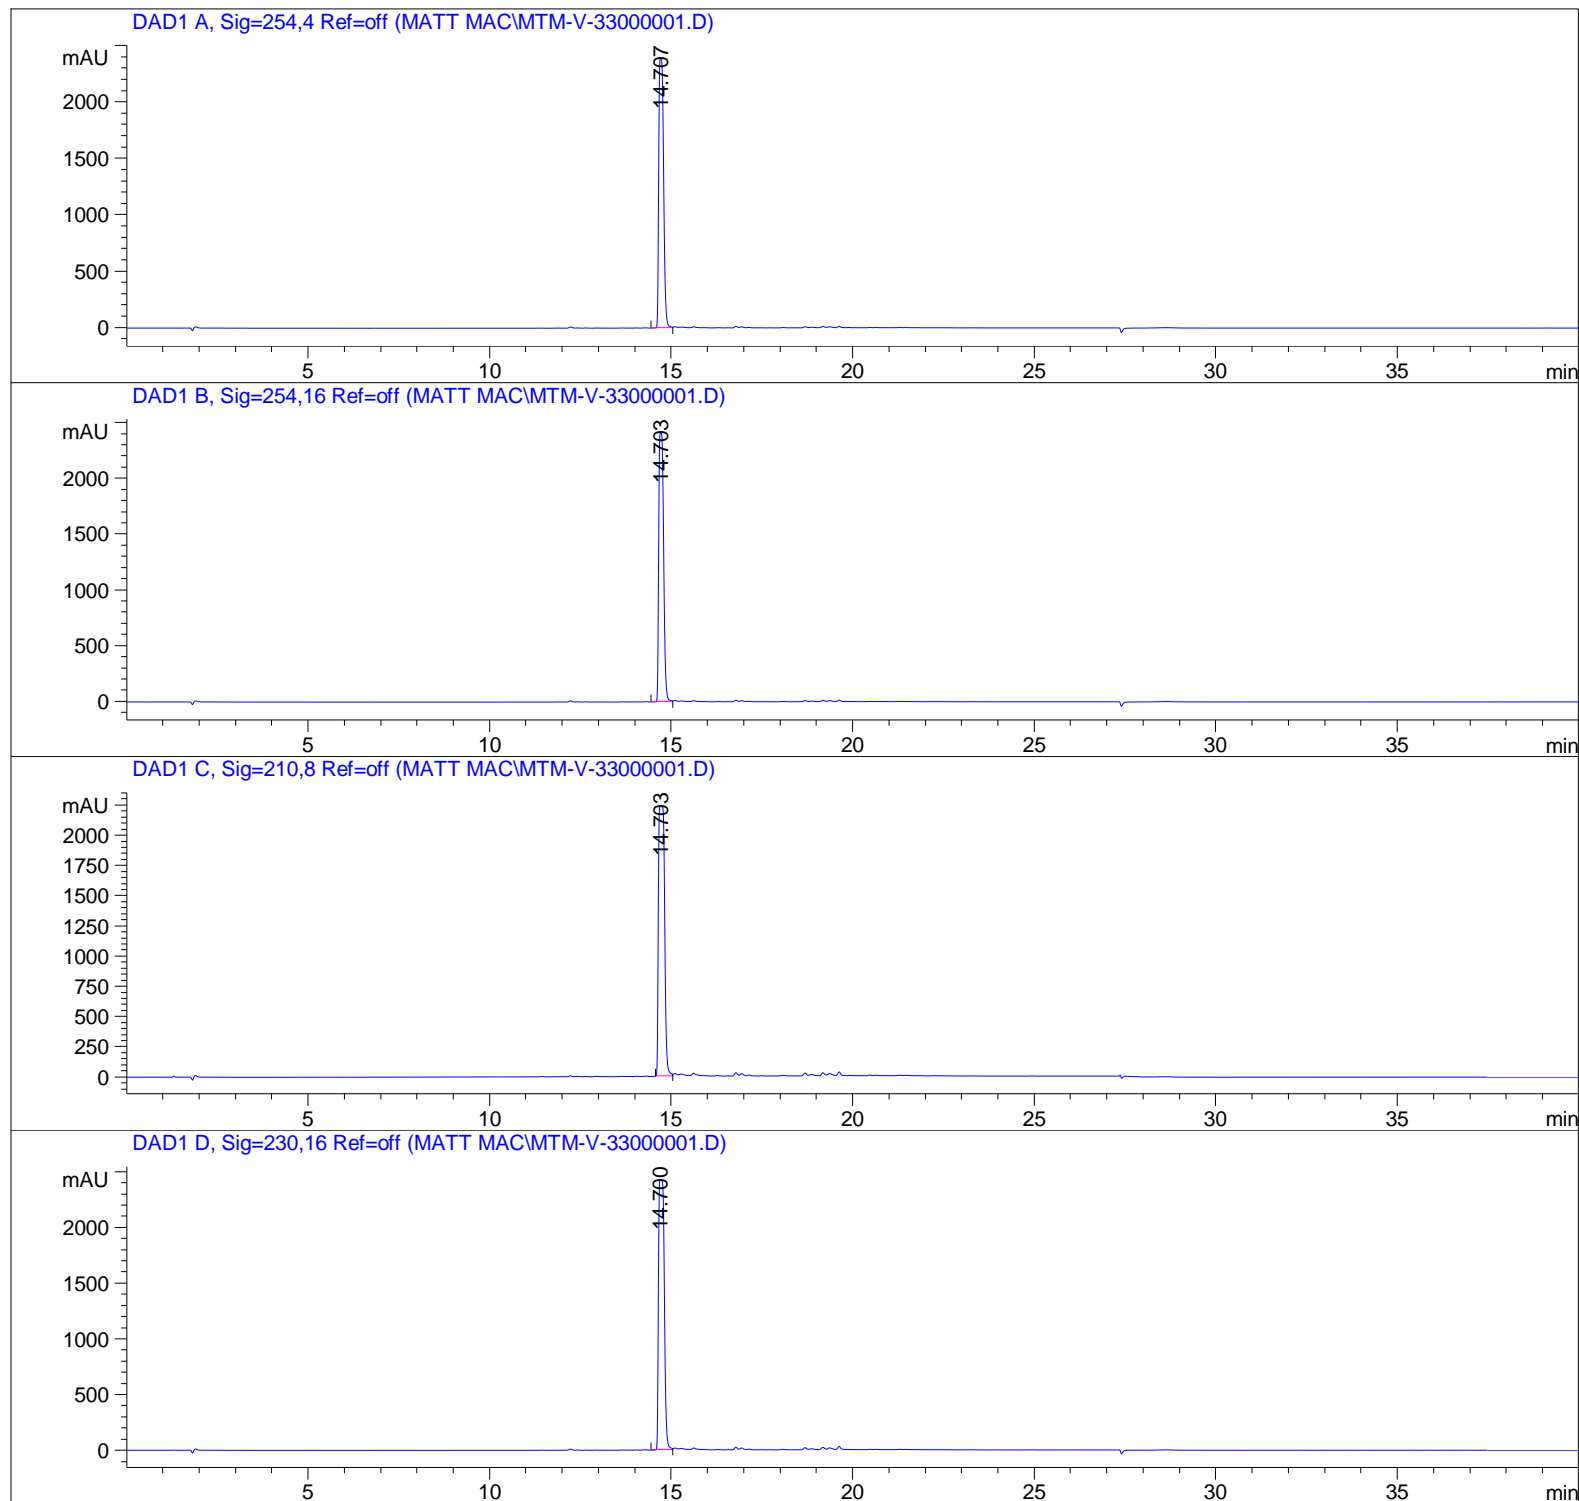

Sample Name: run1

## HPLC traces of compound 31

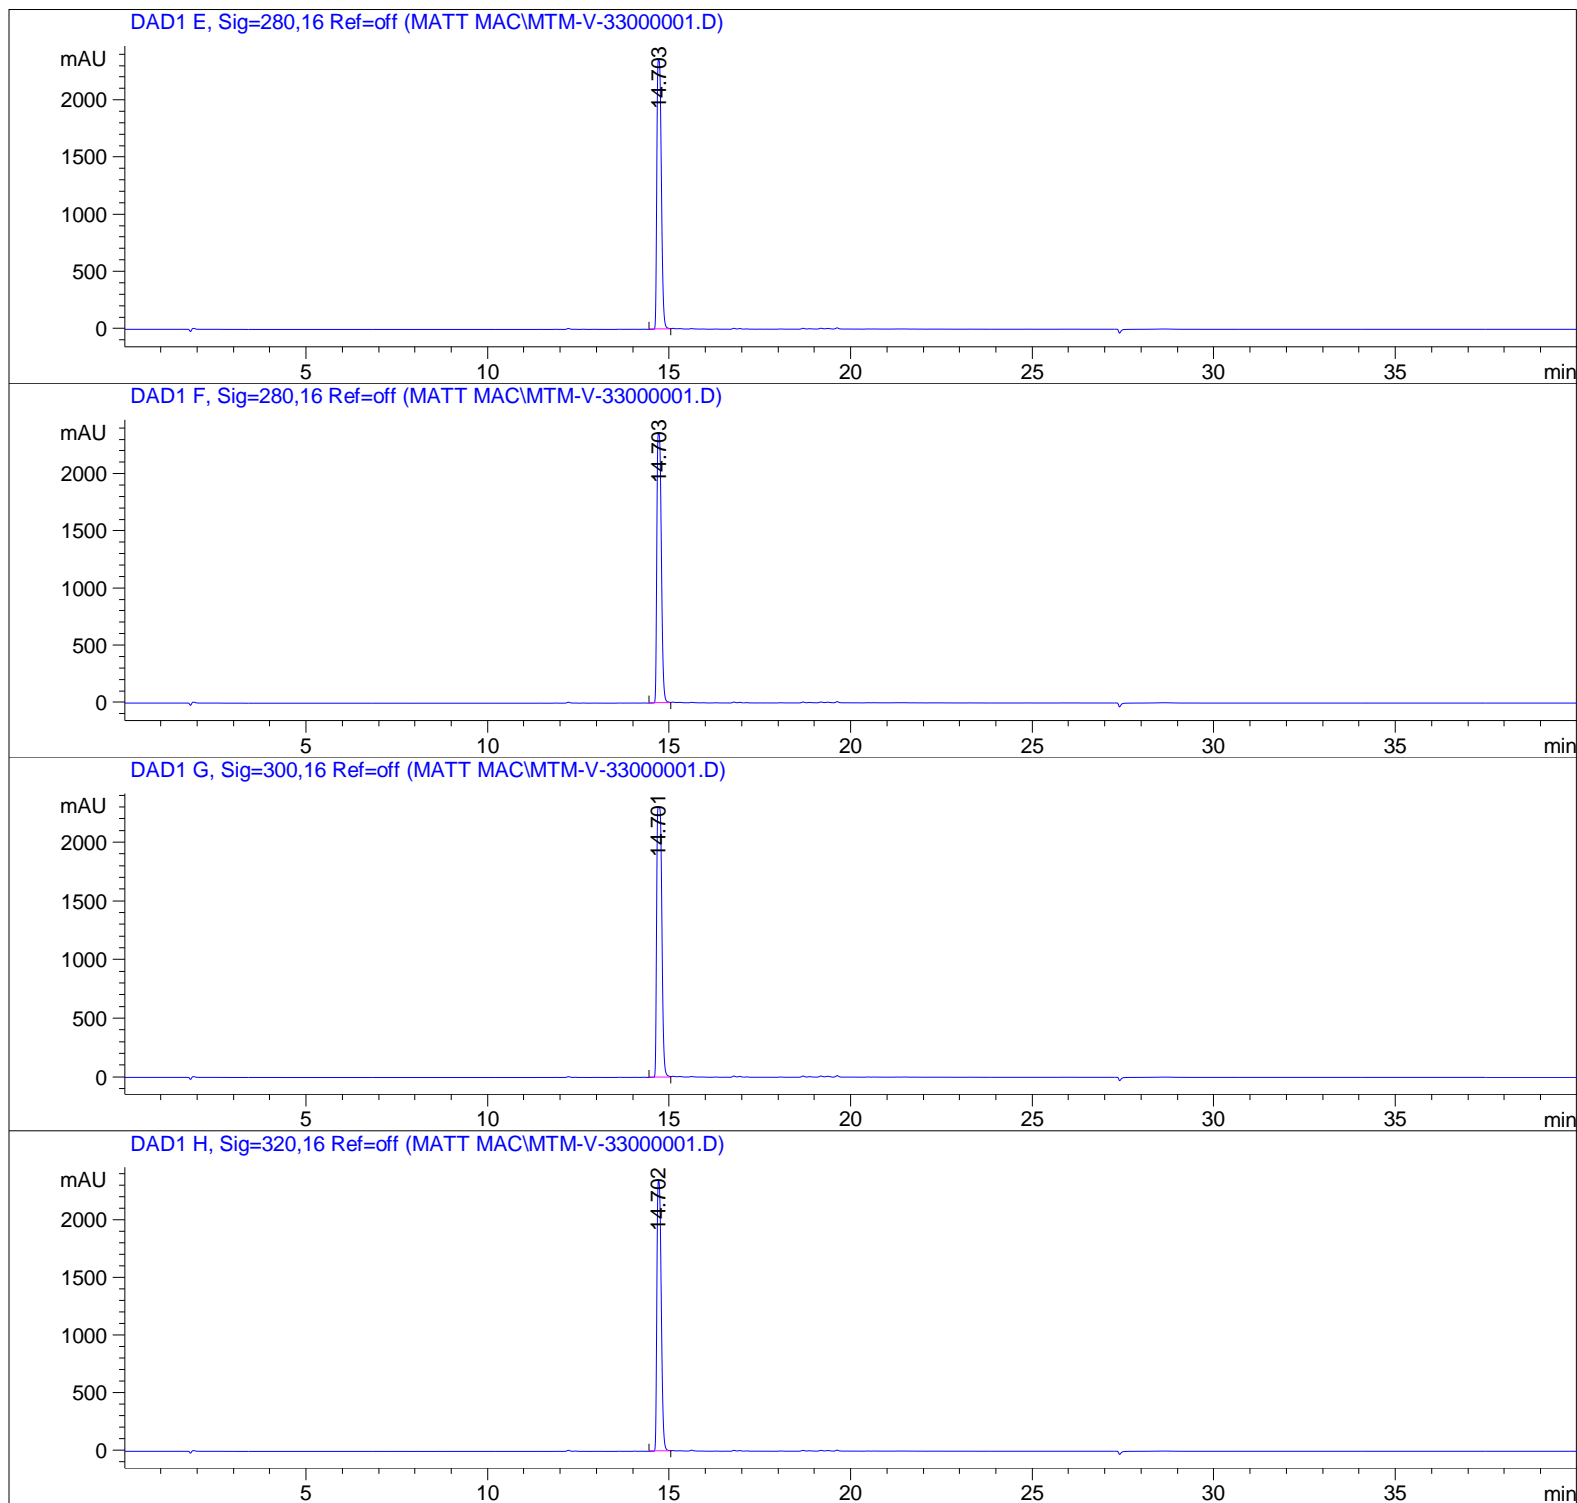=====  
Area Percent Report  
=====

Sorted By : Signal  
Multiplier : 1.0000  
Dilution : 1.0000  
Use Multiplier & Dilution Factor with ISTDs

Sample Name: run1

## HPLC traces of compound 31

Signal 1: DAD1 A, Sig=254,4 Ref=off

| Peak # | RetTime [min] | Type | Width [min] | Area [mAU*s] | Height [mAU] | Area %   |
|--------|---------------|------|-------------|--------------|--------------|----------|
| 1      | 14.707        | BV   | 0.1464      | 2.17409e4    | 2383.37598   | 100.0000 |

Totals : 2.17409e4 2383.37598

Signal 2: DAD1 B, Sig=254,16 Ref=off

| Peak # | RetTime [min] | Type | Width [min] | Area [mAU*s] | Height [mAU] | Area %   |
|--------|---------------|------|-------------|--------------|--------------|----------|
| 1      | 14.703        | BV   | 0.1489      | 2.21007e4    | 2411.10132   | 100.0000 |

Totals : 2.21008e4 2411.10132

Signal 3: DAD1 C, Sig=210,8 Ref=off

| Peak # | RetTime [min] | Type | Width [min] | Area [mAU*s] | Height [mAU] | Area %   |
|--------|---------------|------|-------------|--------------|--------------|----------|
| 1      | 14.703        | BV   | 0.1598      | 2.59557e4    | 2230.39380   | 100.0000 |

Totals : 2.59557e4 2230.39380

Signal 4: DAD1 D, Sig=230,16 Ref=off

| Peak # | RetTime [min] | Type | Width [min] | Area [mAU*s] | Height [mAU] | Area %   |
|--------|---------------|------|-------------|--------------|--------------|----------|
| 1      | 14.700        | BV   | 0.1769      | 2.63170e4    | 2418.76001   | 100.0000 |

Totals : 2.63170e4 2418.76001

Signal 5: DAD1 E, Sig=280,16 Ref=off

| Peak # | RetTime [min] | Type | Width [min] | Area [mAU*s] | Height [mAU] | Area %   |
|--------|---------------|------|-------------|--------------|--------------|----------|
| 1      | 14.703        | BV   | 0.1372      | 2.00450e4    | 2357.87817   | 100.0000 |

Totals : 2.00450e4 2357.87817

Sample Name: run1

## HPLC traces of compound 31

Signal 6: DAD1 F, Sig=280,16 Ref=off

| Peak # | RetTime [min] | Type | Width [min] | Area [mAU*s] | Height [mAU] | Area %   |
|--------|---------------|------|-------------|--------------|--------------|----------|
| 1      | 14.703        | BV   | 0.1372      | 2.00450e4    | 2357.87817   | 100.0000 |

Totals : 2.00450e4 2357.87817

Signal 7: DAD1 G, Sig=300,16 Ref=off

| Peak # | RetTime [min] | Type | Width [min] | Area [mAU*s] | Height [mAU] | Area %   |
|--------|---------------|------|-------------|--------------|--------------|----------|
| 1      | 14.701        | BV   | 0.1575      | 2.24037e4    | 2303.29663   | 100.0000 |

Totals : 2.24037e4 2303.29663

Signal 8: DAD1 H, Sig=320,16 Ref=off

| Peak # | RetTime [min] | Type | Width [min] | Area [mAU*s] | Height [mAU] | Area %   |
|--------|---------------|------|-------------|--------------|--------------|----------|
| 1      | 14.702        | BV   | 0.1321      | 1.93282e4    | 2345.59521   | 100.0000 |

Totals : 1.93282e4 2345.59521

=====  
\*\*\* End of Report \*\*\*

# HRMS of compound 31

C:\Xcalibur\...Matt2-10-2013\MTM-V-33

2/10/2013 12:38:13 PM

MTM-V-33

MTM-V-33 #20 RT: 0.17 AV: 1 NL: 1.18E7  
T: FTMS + p ESI Full ms [200.00-2000.00]

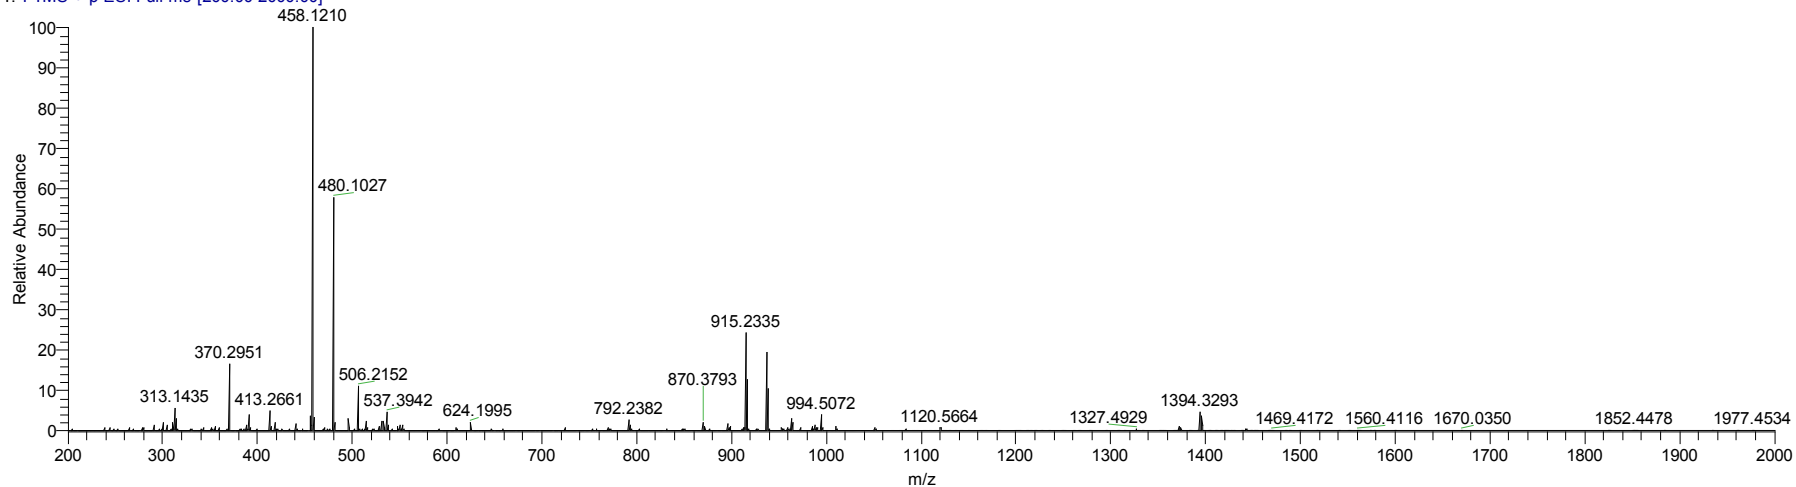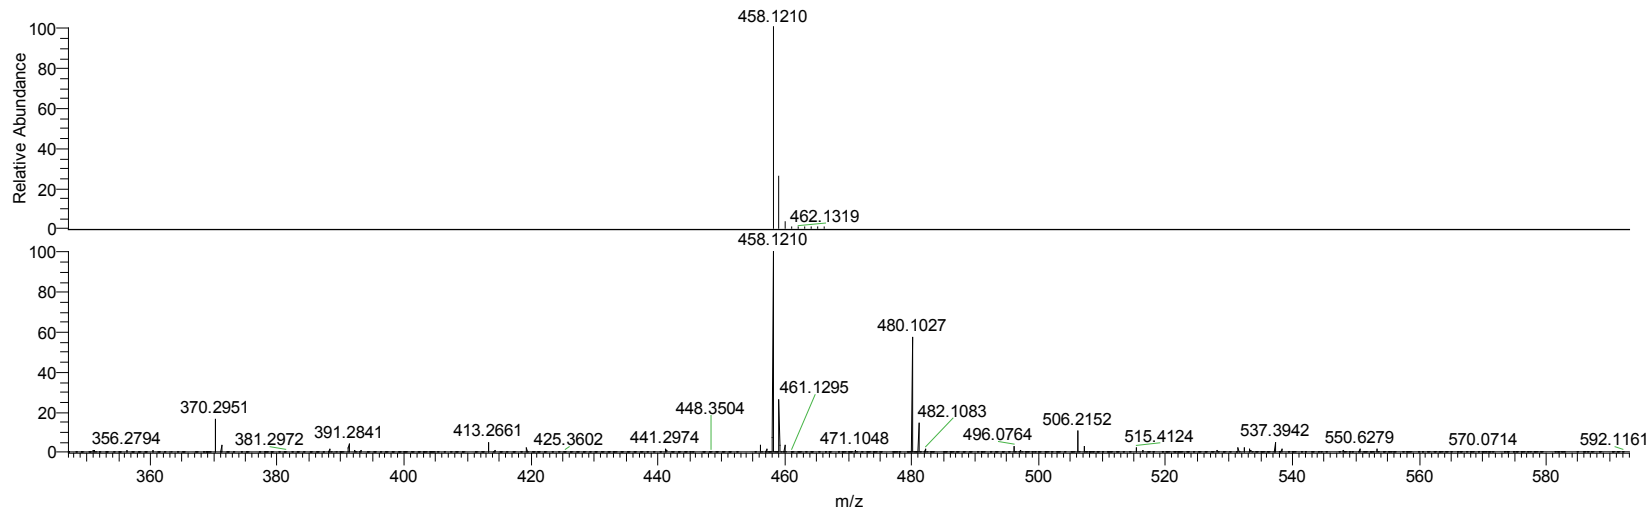

NL:  
7.59E5  
C<sub>24</sub>H<sub>19</sub>O<sub>5</sub>NF<sub>3</sub>  
C<sub>24</sub>H<sub>19</sub>O<sub>5</sub>N<sub>1</sub>F<sub>3</sub>  
pa Chrg 1

NL:  
1.18E7  
MTM-V-33#20  
RT: 0.17 AV: 1 T:  
FTMS + p ESI Full  
ms  
[200.00-2000.00]



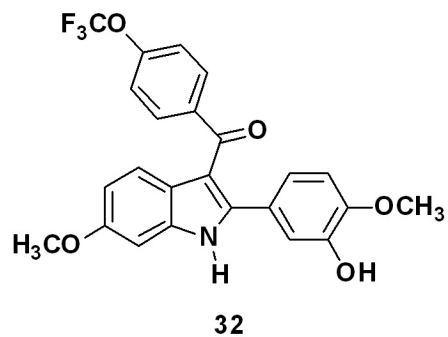

—10.86

7.92  
7.90  
7.69  
7.66  
7.64  
7.11  
7.09  
7.04  
7.03  
6.90  
6.88  
6.88  
6.86  
6.86  
6.71

3.84  
3.77

—2.94

2.06  
2.05  
2.05  
2.05  
2.04

0.90

1.00  
0.97  
1.97  
2.01  
1.00  
0.98  
1.03  
2.01

3.00  
3.01

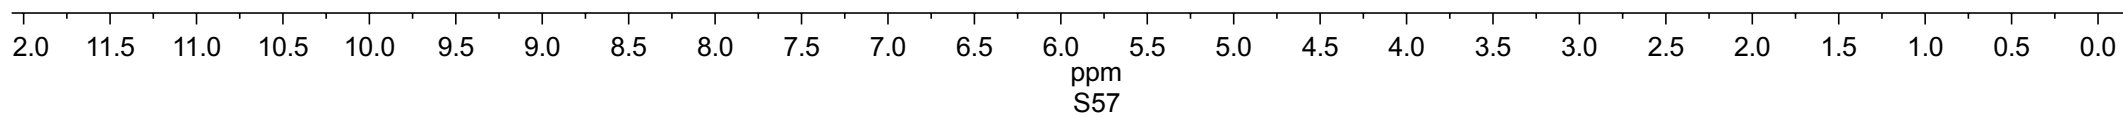

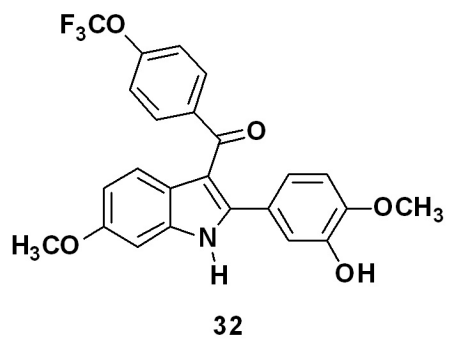

206.40  
191.59  
158.13  
151.36  
151.34  
151.33  
151.32  
148.90  
147.18  
145.07  
140.47  
137.80  
132.01  
125.70  
124.30  
123.73  
122.72  
122.67  
122.27  
120.68  
120.23  
118.19  
116.93  
113.04  
112.26  
111.79  
95.50

56.14  
55.77

30.30  
30.15  
29.99  
29.84  
29.69  
29.53  
29.38

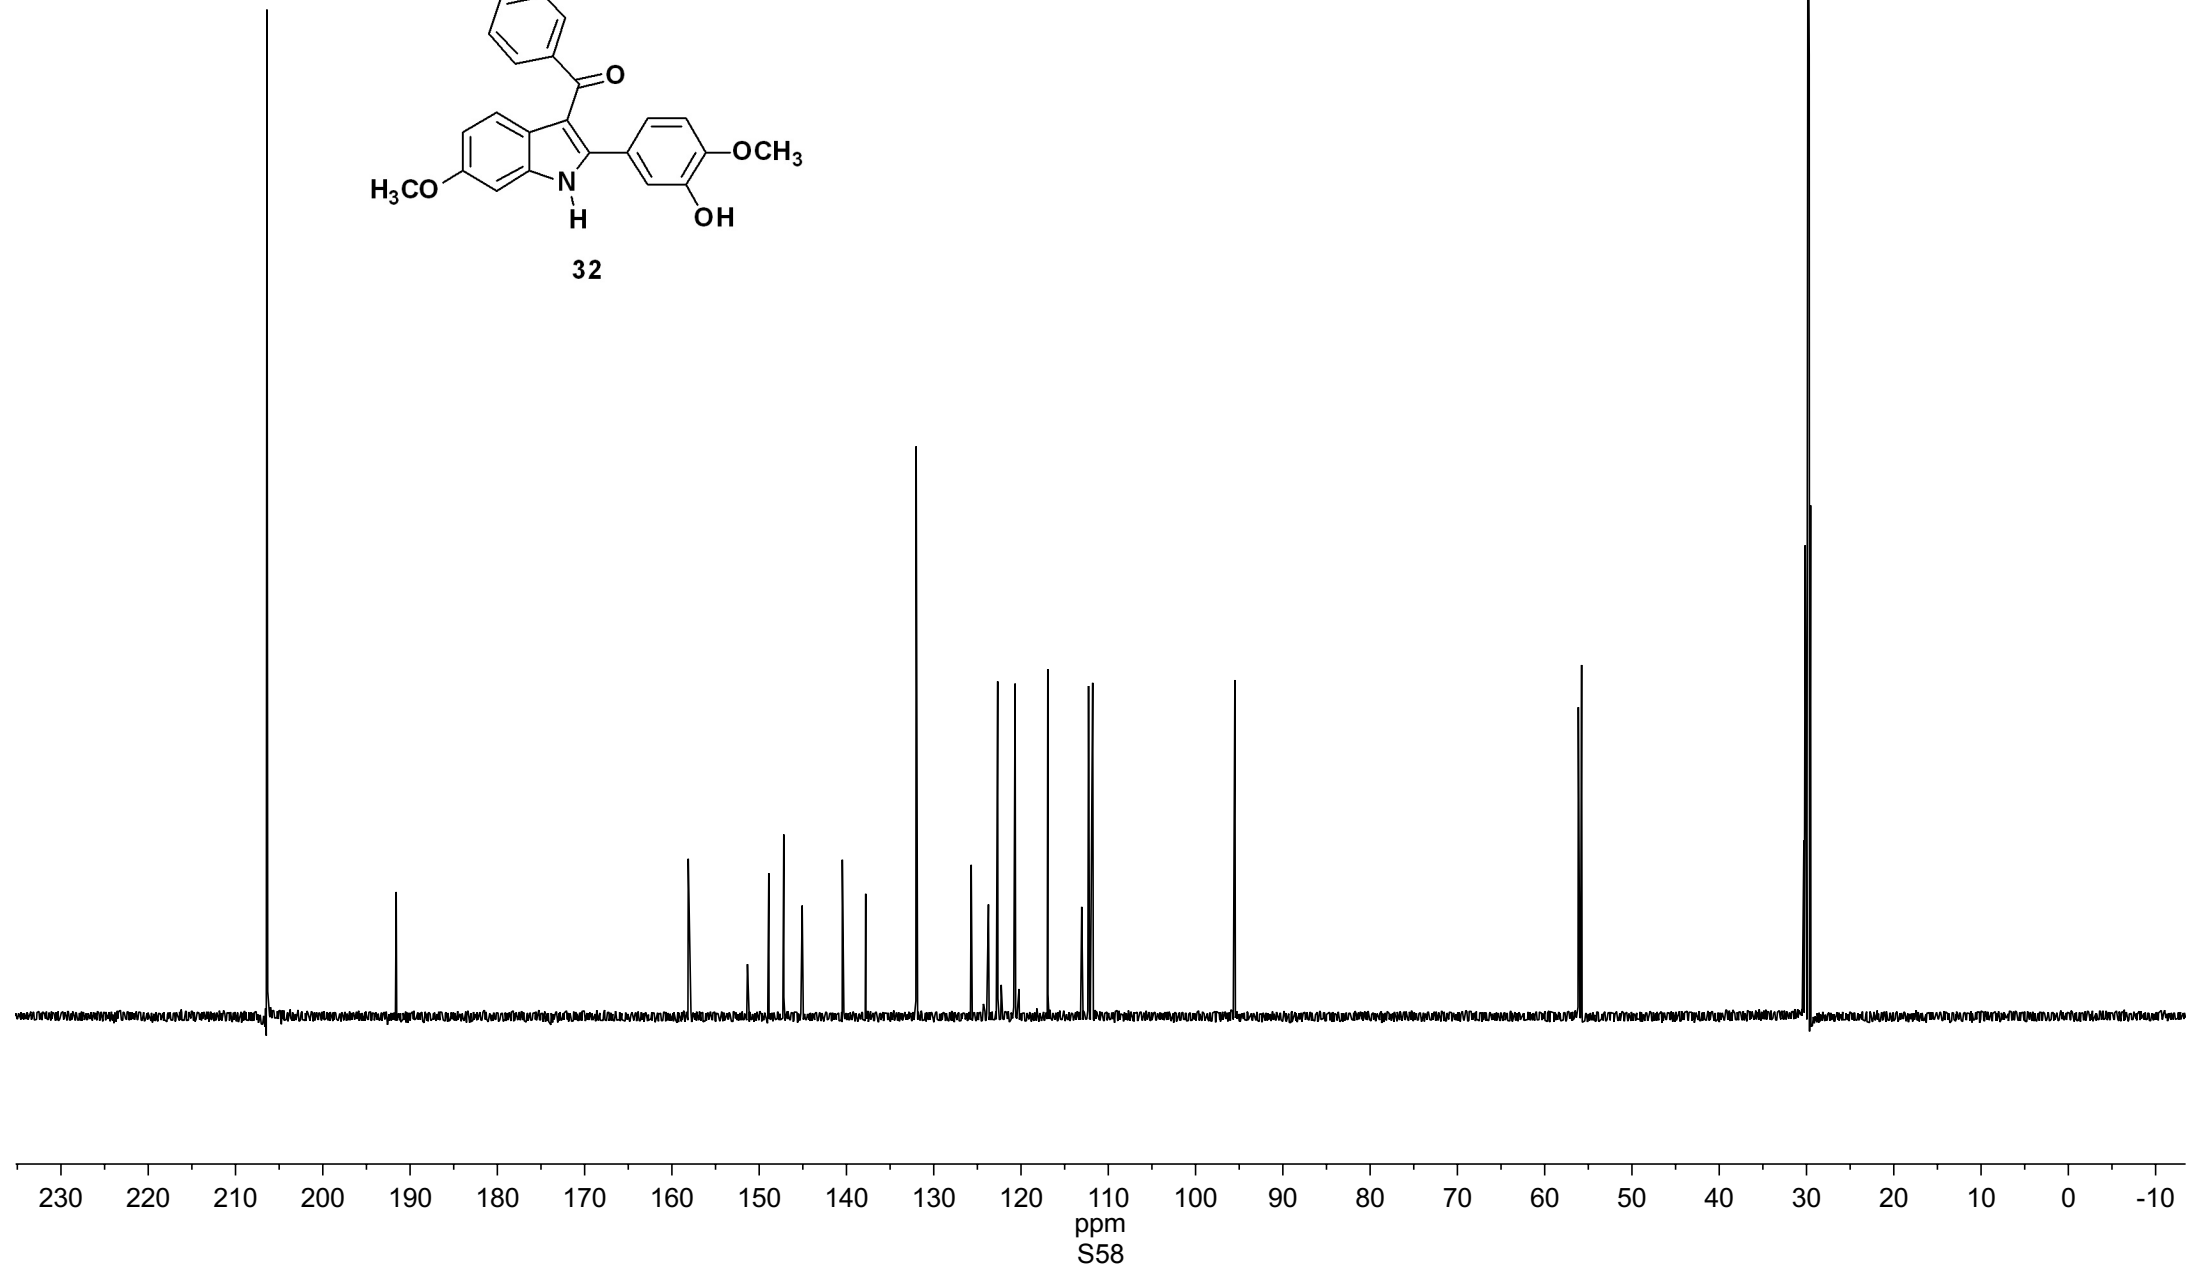

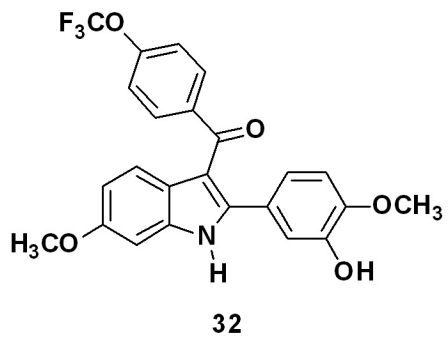

58.50

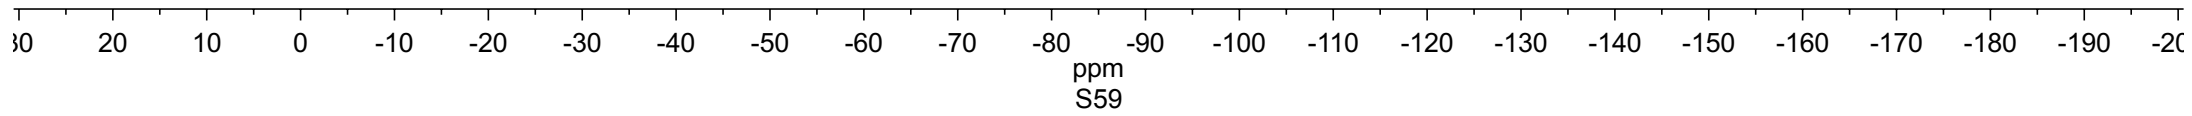

Sample Name: run1

## HPLC traces of compound 32

=====

Acq. Operator : Matt Mac  
Acq. Instrument : Instrument 1 Location : -  
Injection Date : 1/9/2013 10:48:37 PM  
Acq. Method : C:\CHEM32\1\METHODS\MASTERMETHOD.M  
Last changed : 1/9/2013 10:45:53 PM by Matt Mac  
Analysis Method : C:\CHEM32\1\METHODS\MASTERMETHOD.M  
Last changed : 1/9/2013 2:04:11 PM by Matt Mac  
(modified after loading)

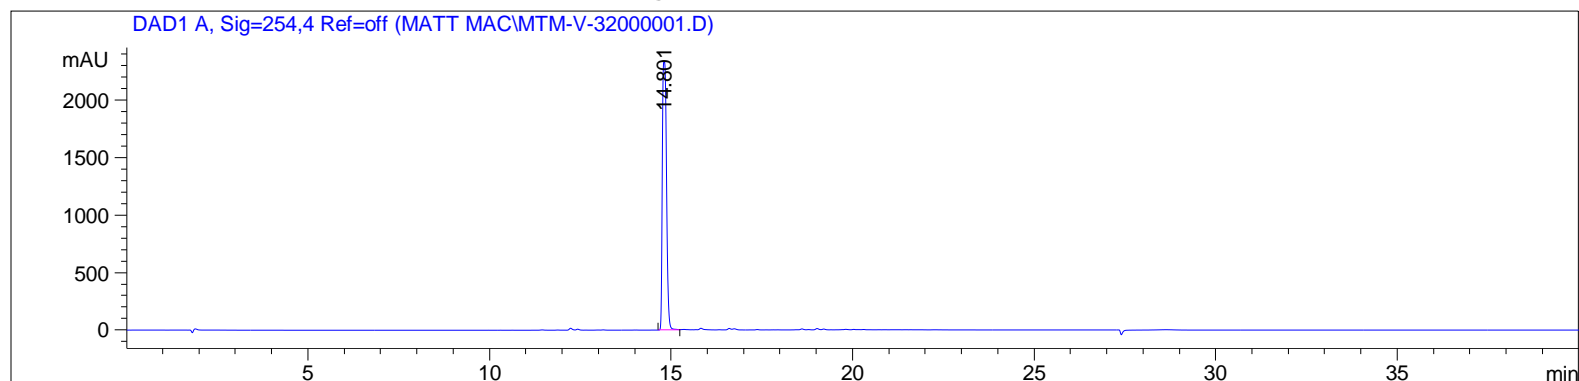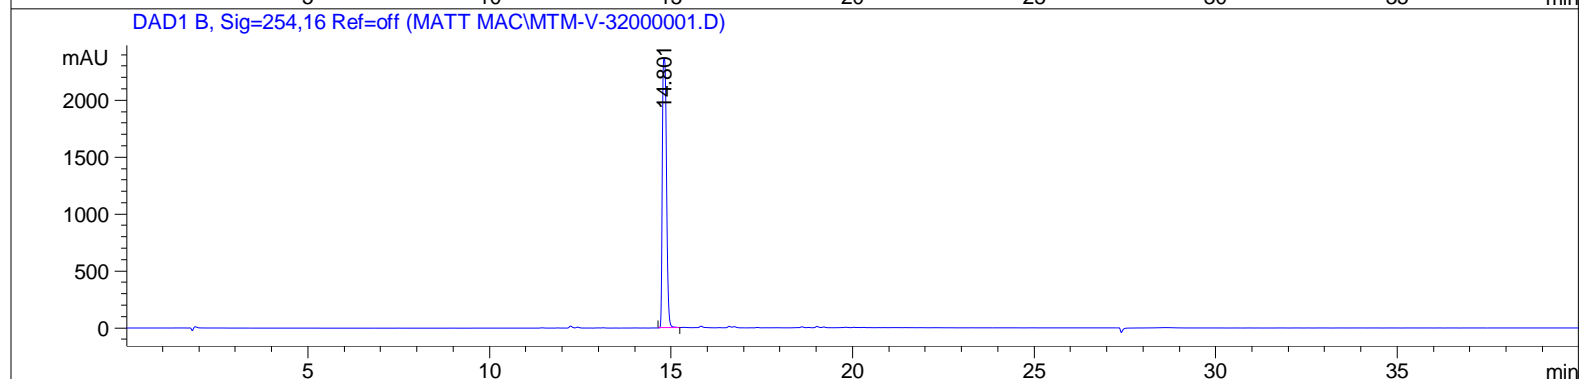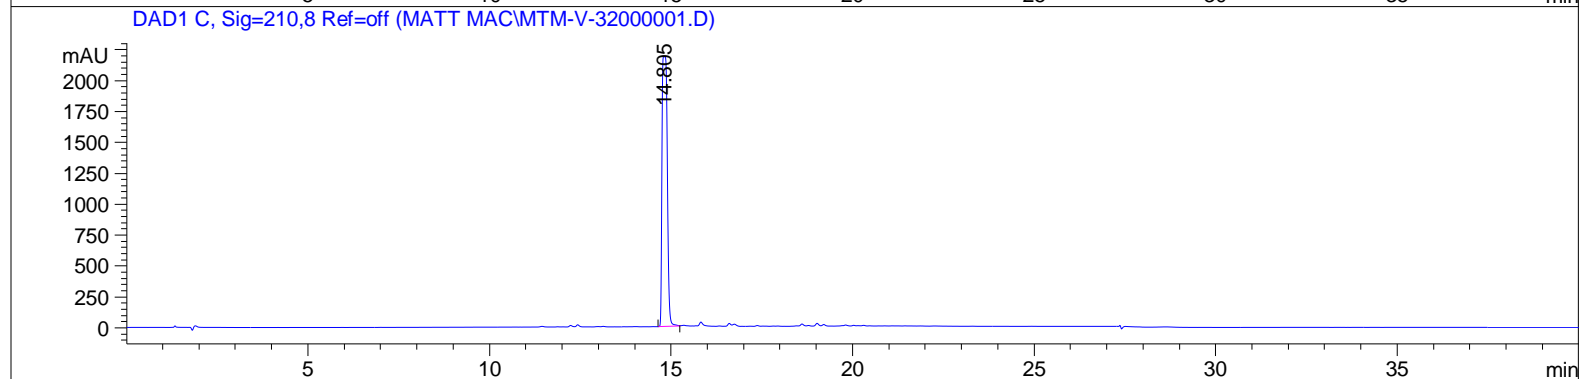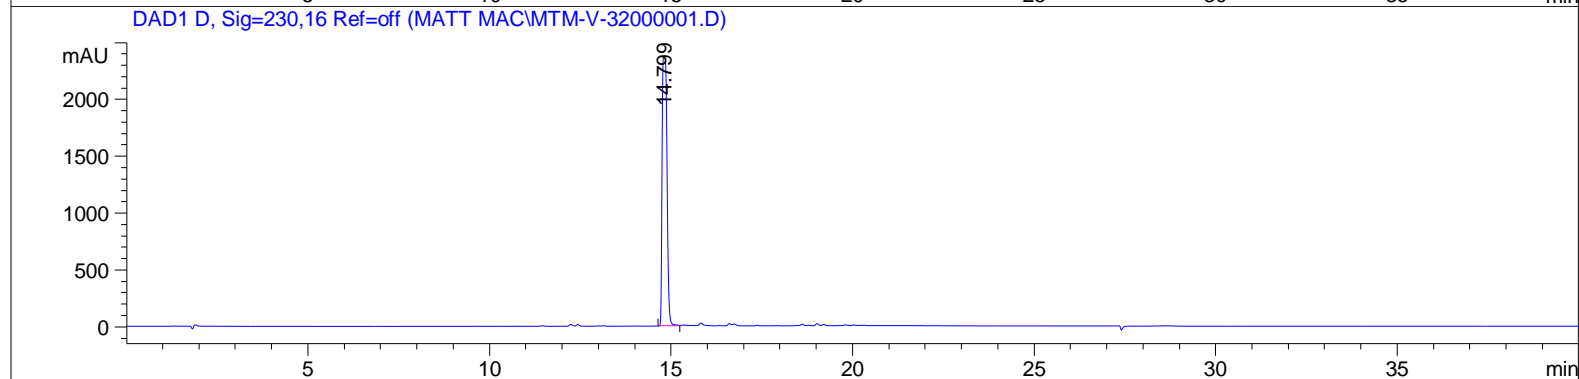

Sample Name: run1

## HPLC traces of compound 32

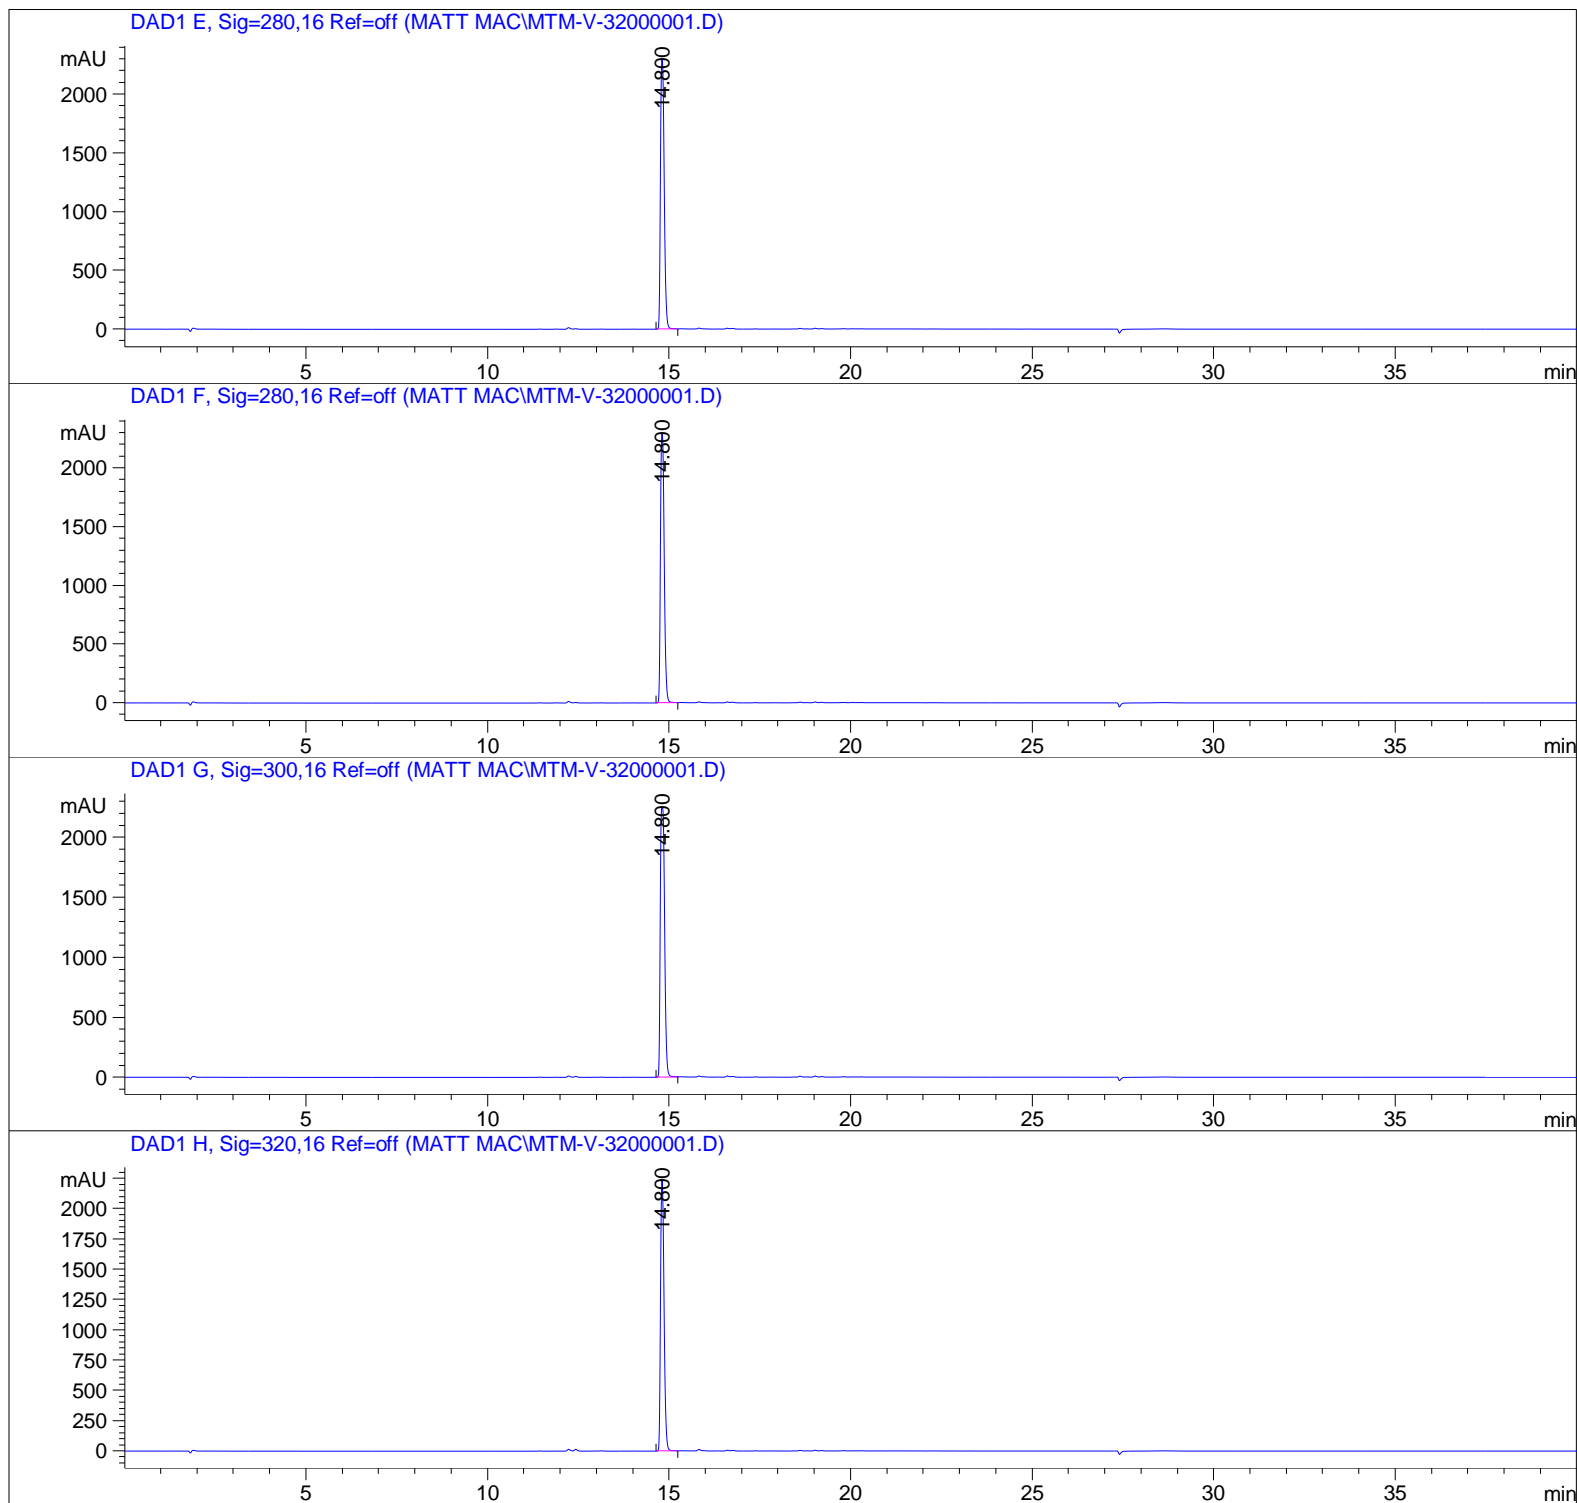=====  
Area Percent Report  
=====

Sorted By : Signal  
Multiplier : 1.0000  
Dilution : 1.0000  
Use Multiplier & Dilution Factor with ISTDs

Sample Name: run1

## HPLC traces of compound 32

Signal 1: DAD1 A, Sig=254,4 Ref=off

| Peak # | RetTime [min] | Type | Width [min] | Area [mAU*s] | Height [mAU] | Area %   |
|--------|---------------|------|-------------|--------------|--------------|----------|
| 1      | 14.801        | BV   | 0.1293      | 1.86964e4    | 2338.97241   | 100.0000 |

Totals : 1.86964e4 2338.97241

Signal 2: DAD1 B, Sig=254,16 Ref=off

| Peak # | RetTime [min] | Type | Width [min] | Area [mAU*s] | Height [mAU] | Area %   |
|--------|---------------|------|-------------|--------------|--------------|----------|
| 1      | 14.801        | BV   | 0.1292      | 1.88715e4    | 2362.03735   | 100.0000 |

Totals : 1.88715e4 2362.03735

Signal 3: DAD1 C, Sig=210,8 Ref=off

| Peak # | RetTime [min] | Type | Width [min] | Area [mAU*s] | Height [mAU] | Area %   |
|--------|---------------|------|-------------|--------------|--------------|----------|
| 1      | 14.805        | BV   | 0.1658      | 2.20478e4    | 2183.30298   | 100.0000 |

Totals : 2.20478e4 2183.30298

Signal 4: DAD1 D, Sig=230,16 Ref=off

| Peak # | RetTime [min] | Type | Width [min] | Area [mAU*s] | Height [mAU] | Area %   |
|--------|---------------|------|-------------|--------------|--------------|----------|
| 1      | 14.799        | BV   | 0.1507      | 2.20887e4    | 2369.97437   | 100.0000 |

Totals : 2.20887e4 2369.97437

Signal 5: DAD1 E, Sig=280,16 Ref=off

| Peak # | RetTime [min] | Type | Width [min] | Area [mAU*s] | Height [mAU] | Area %   |
|--------|---------------|------|-------------|--------------|--------------|----------|
| 1      | 14.800        | BV   | 0.1131      | 1.63461e4    | 2295.18311   | 100.0000 |

Totals : 1.63461e4 2295.18311

Sample Name: run1

## HPLC traces of compound 32

Signal 6: DAD1 F, Sig=280,16 Ref=off

| Peak # | RetTime [min] | Type | Width [min] | Area [mAU*s] | Height [mAU] | Area %   |
|--------|---------------|------|-------------|--------------|--------------|----------|
| 1      | 14.800        | BV   | 0.1131      | 1.63461e4    | 2295.18311   | 100.0000 |

Totals : 1.63461e4 2295.18311

Signal 7: DAD1 G, Sig=300,16 Ref=off

| Peak # | RetTime [min] | Type | Width [min] | Area [mAU*s] | Height [mAU] | Area %   |
|--------|---------------|------|-------------|--------------|--------------|----------|
| 1      | 14.800        | BV   | 0.1317      | 1.84678e4    | 2251.13892   | 100.0000 |

Totals : 1.84678e4 2251.13892

Signal 8: DAD1 H, Sig=320,16 Ref=off

| Peak # | RetTime [min] | Type | Width [min] | Area [mAU*s] | Height [mAU] | Area %   |
|--------|---------------|------|-------------|--------------|--------------|----------|
| 1      | 14.800        | BV   | 0.1063      | 1.49695e4    | 2231.31665   | 100.0000 |

Totals : 1.49695e4 2231.31665

=====  
\*\*\* End of Report \*\*\*

# HRMS of compound 32

C:\Xcalibur\...Matt\2-10-2013\MTM-V-32

2/10/2013 12:25:45 PM

MTM-V-32

MTM-V-32 #7 RT: 0.05 AV: 1 NL: 2.22E7

T: FTMS + p ESI Full ms [200.00-2000.00]

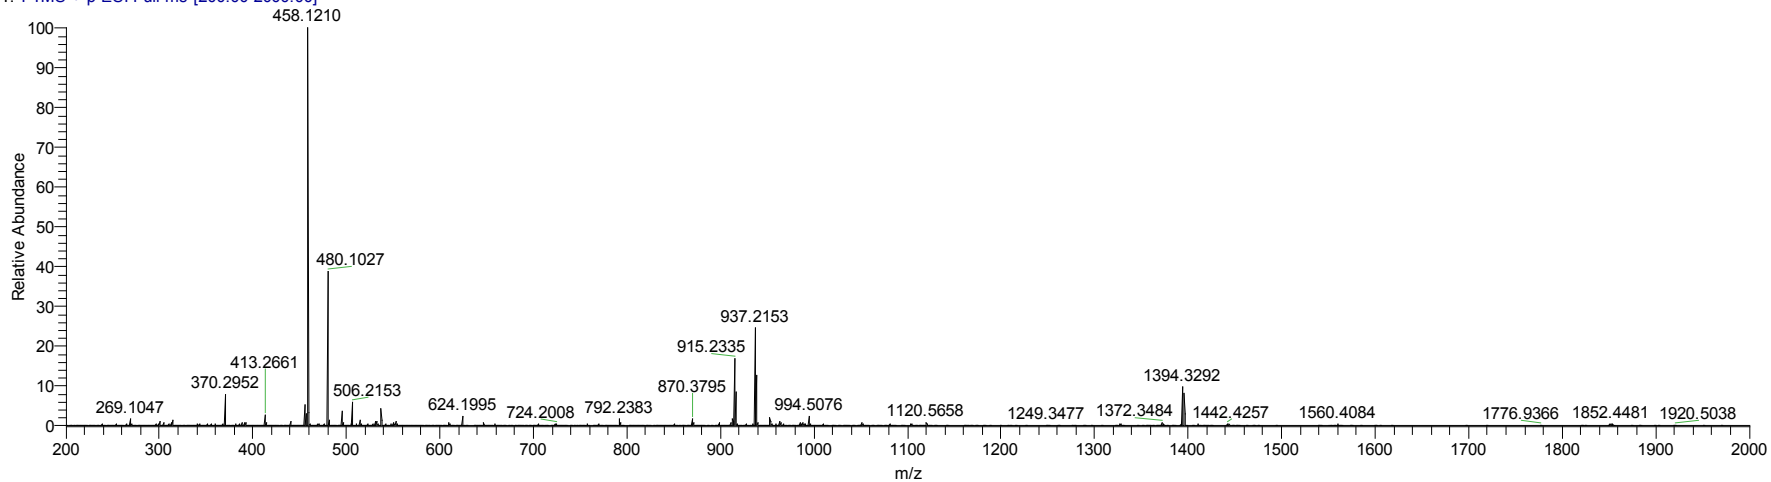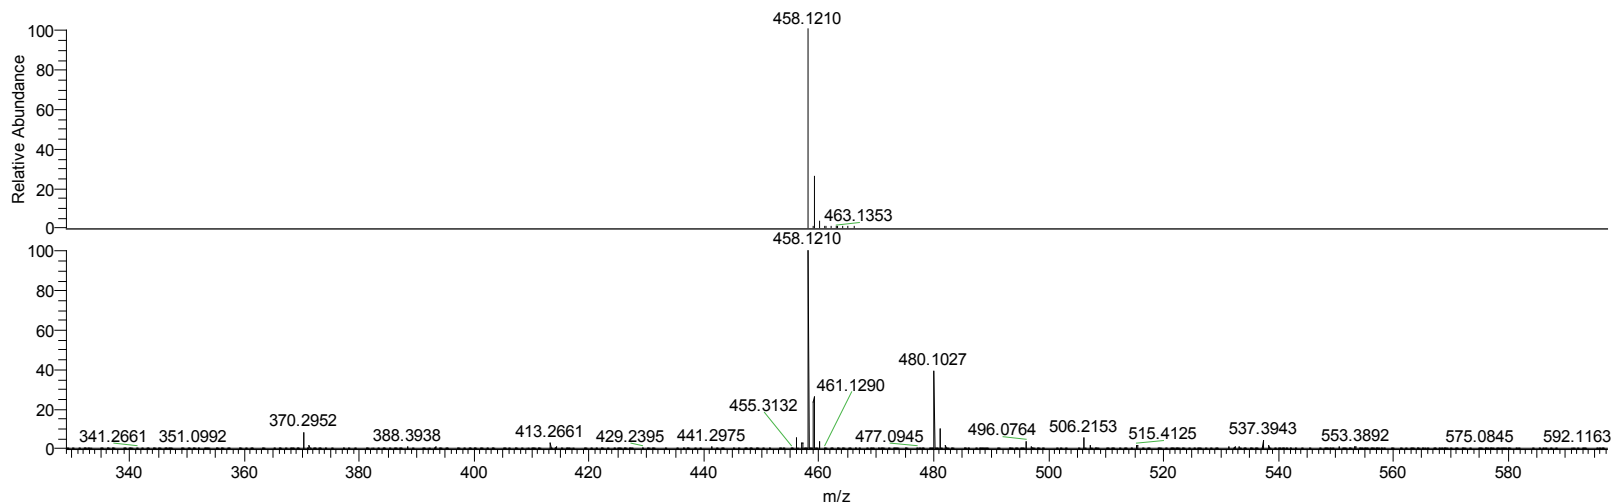

NL:  
7.59E5  
C<sub>24</sub>H<sub>19</sub>O<sub>5</sub>NF<sub>3</sub>  
C<sub>24</sub>H<sub>19</sub>O<sub>5</sub>N<sub>1</sub>F<sub>3</sub>  
pa Chrg 1

NL:  
2.22E7  
MTM-V-32#7 RT:  
0.05 AV: 1 T:  
FTMS + p ESI  
Full ms  
[200.00-2000.00]



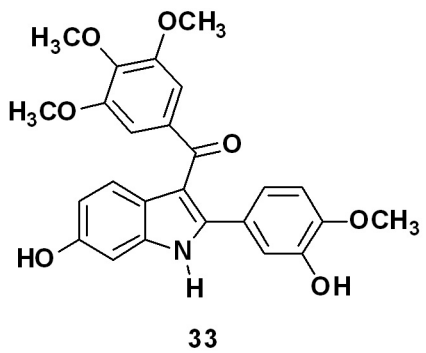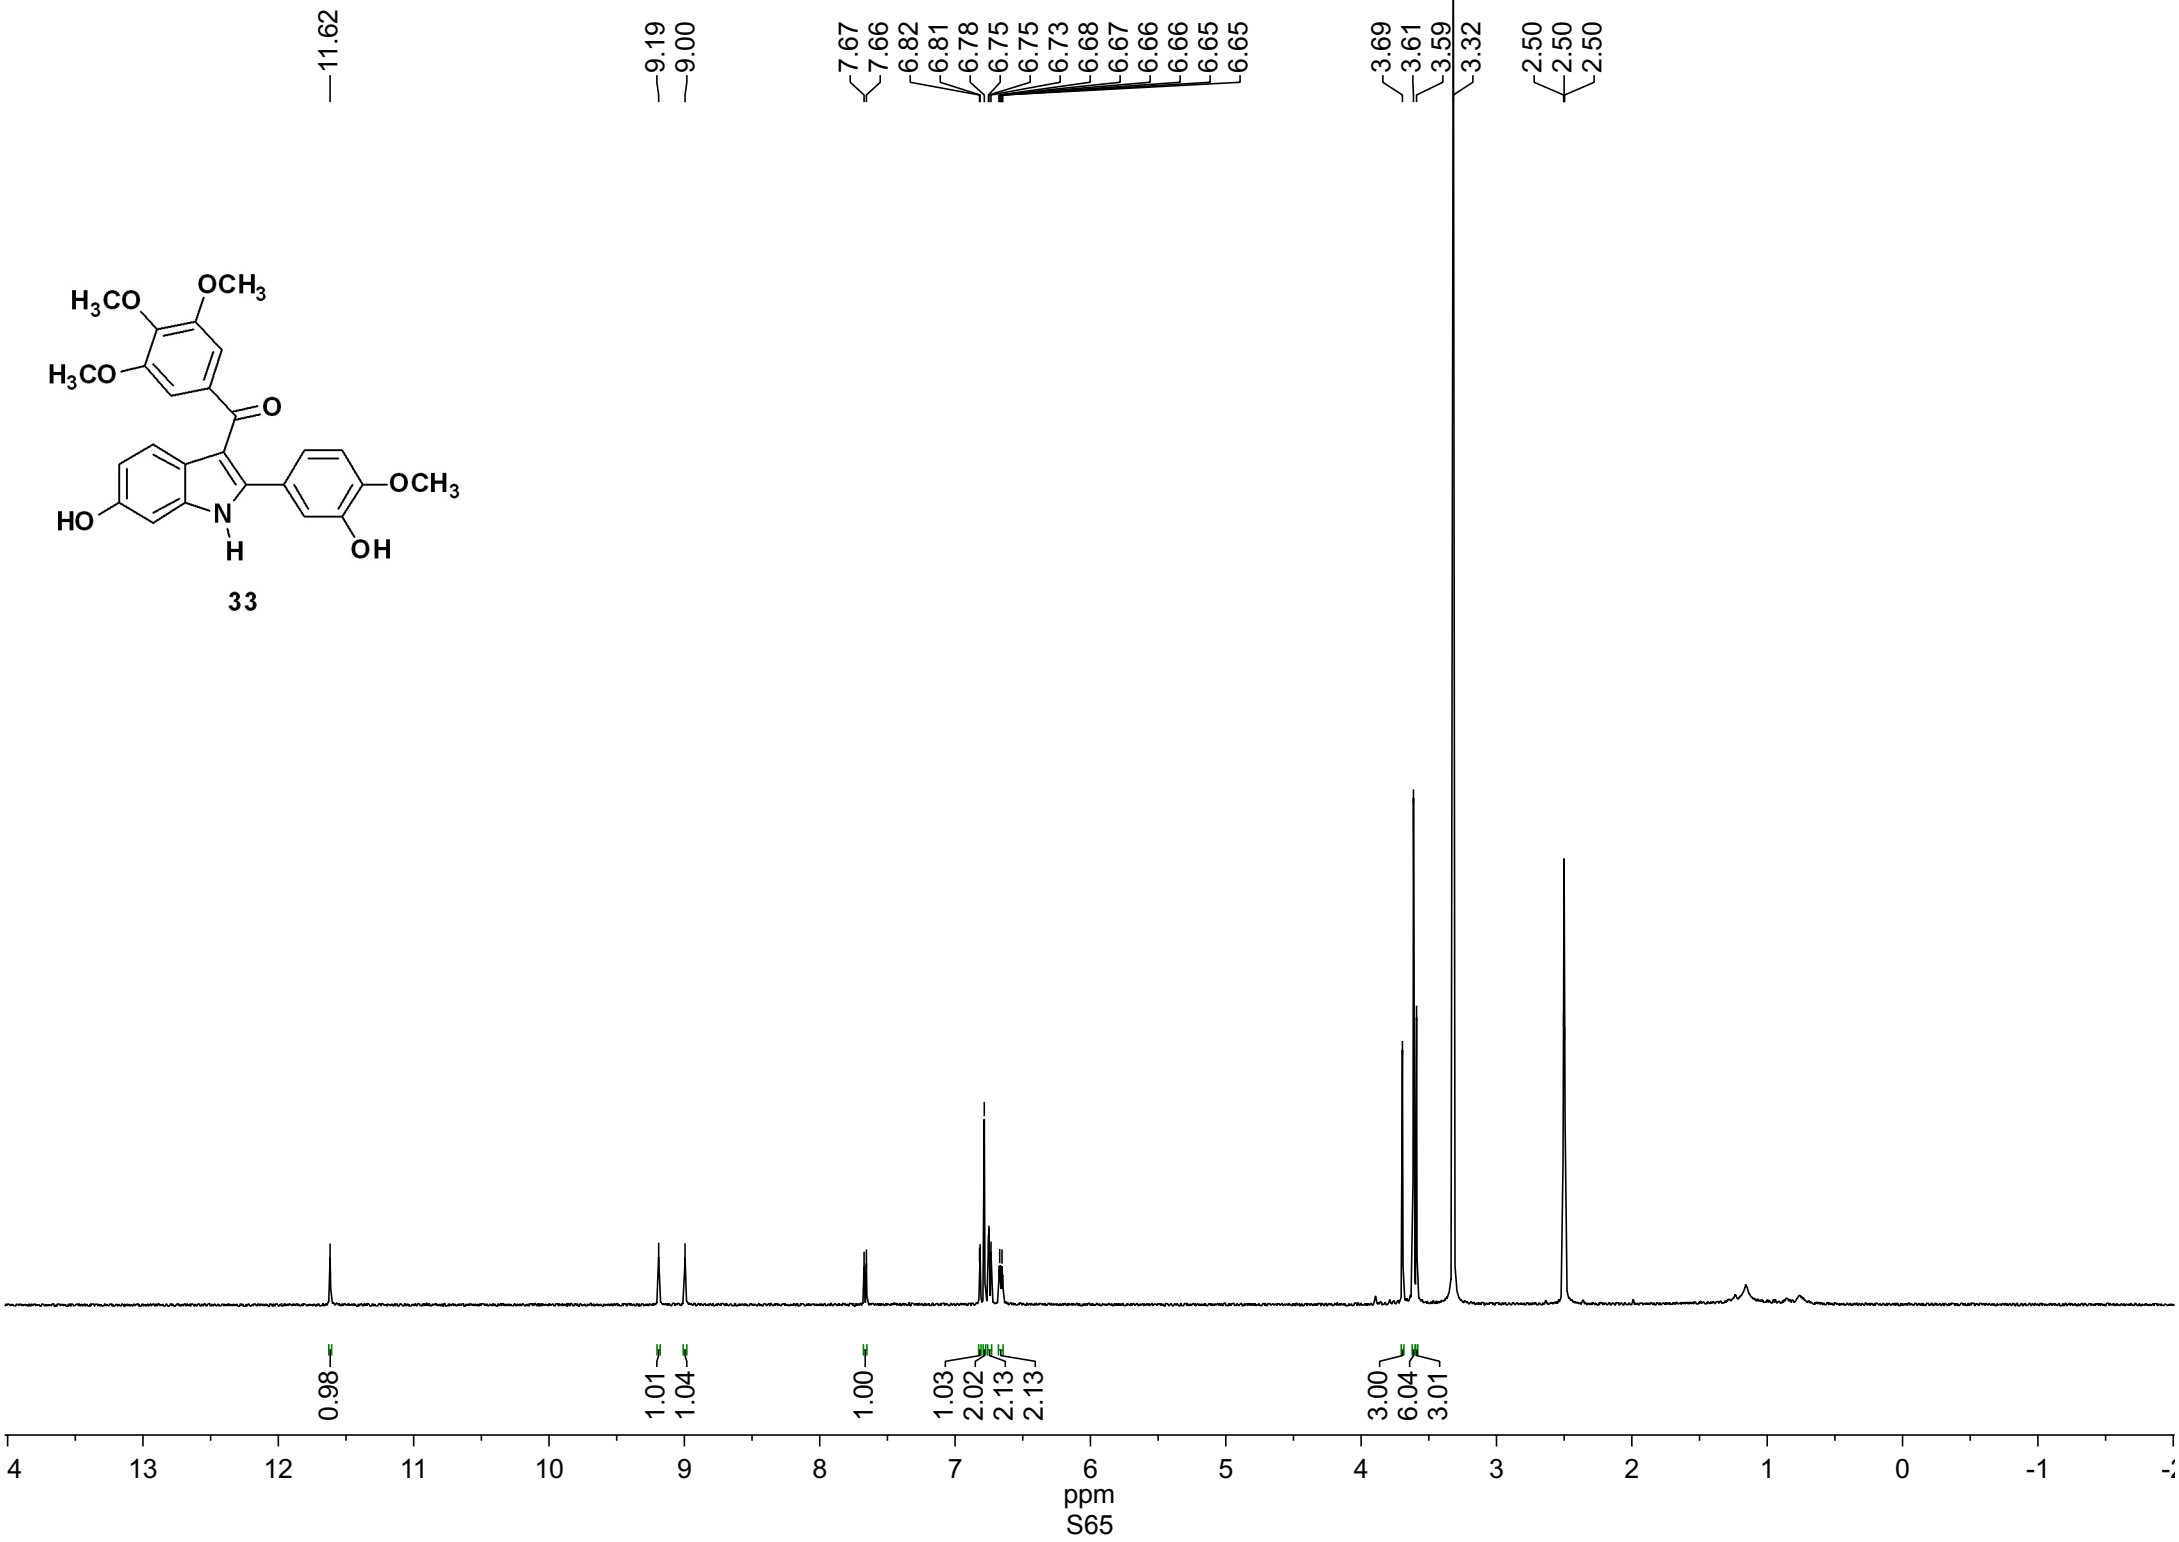

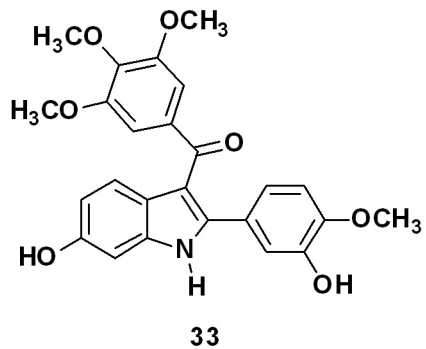

155.17  
 153.42  
 148.50  
 147.00  
 143.68  
 141.78  
 137.98  
 136.36  
 126.46  
 123.38  
 122.69  
 122.01  
 116.89  
 113.05  
 112.26  
 111.82  
 107.99  
 97.43

60.41  
 56.18  
 56.17

30.21  
 30.06  
 29.91  
 29.89  
 29.75  
 29.74  
 29.60  
 29.59  
 29.45  
 29.43  
 29.29

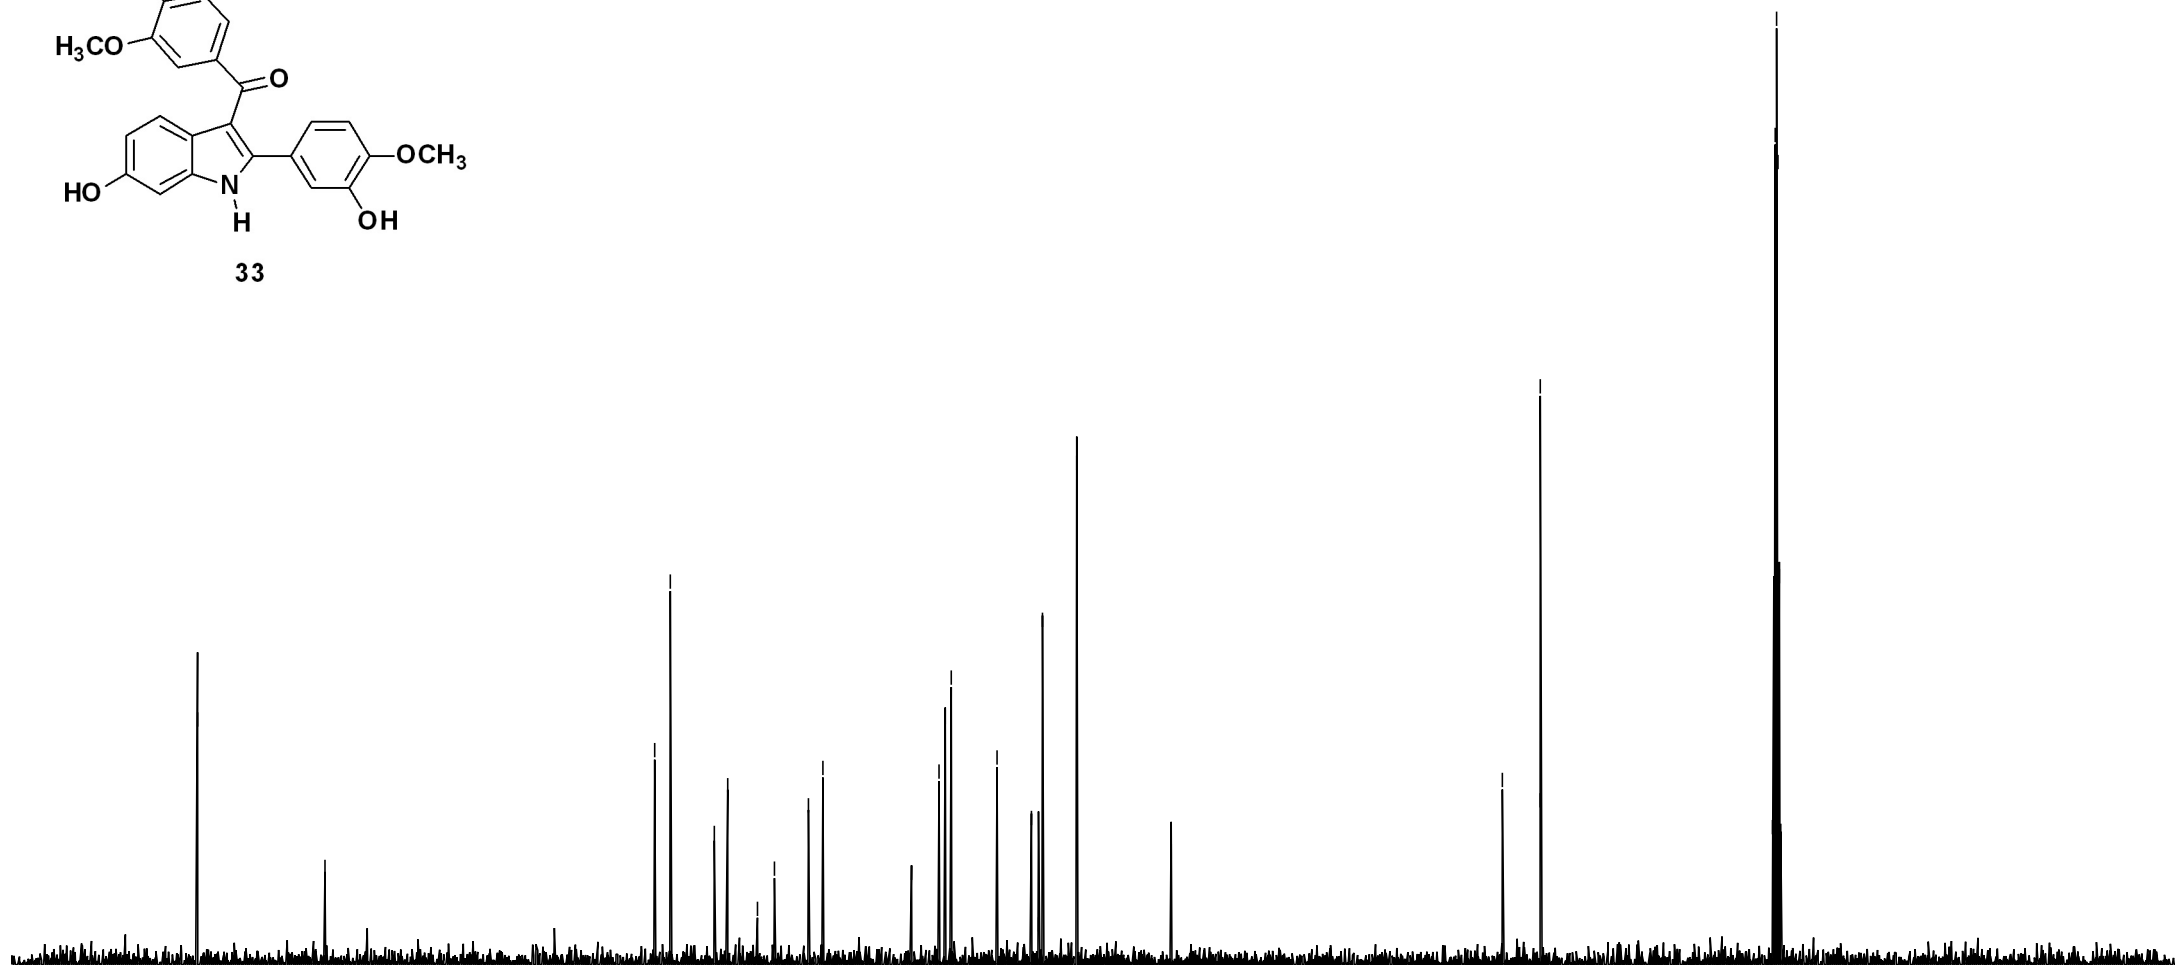

220 210 200 190 180 170 160 150 140 130 120 110 100 90 80 70 60 50 40 30 20 10 0 -10

ppm  
 S66

Sample Name: run1

## HPLC traces of compound 33

=====  
Acq. Operator : Matt Mac  
Acq. Instrument : Instrument 1 Location : -  
Injection Date : 1/8/2013 9:52:08 PM  
Acq. Method : C:\CHEM32\1\METHODS\MASTERMETHOD.M  
Last changed : 1/8/2013 9:30:46 PM by Matt Mac  
Analysis Method : C:\CHEM32\1\METHODS\MASTERMETHOD.M  
Last changed : 1/3/2013 5:04:04 PM by Laxman

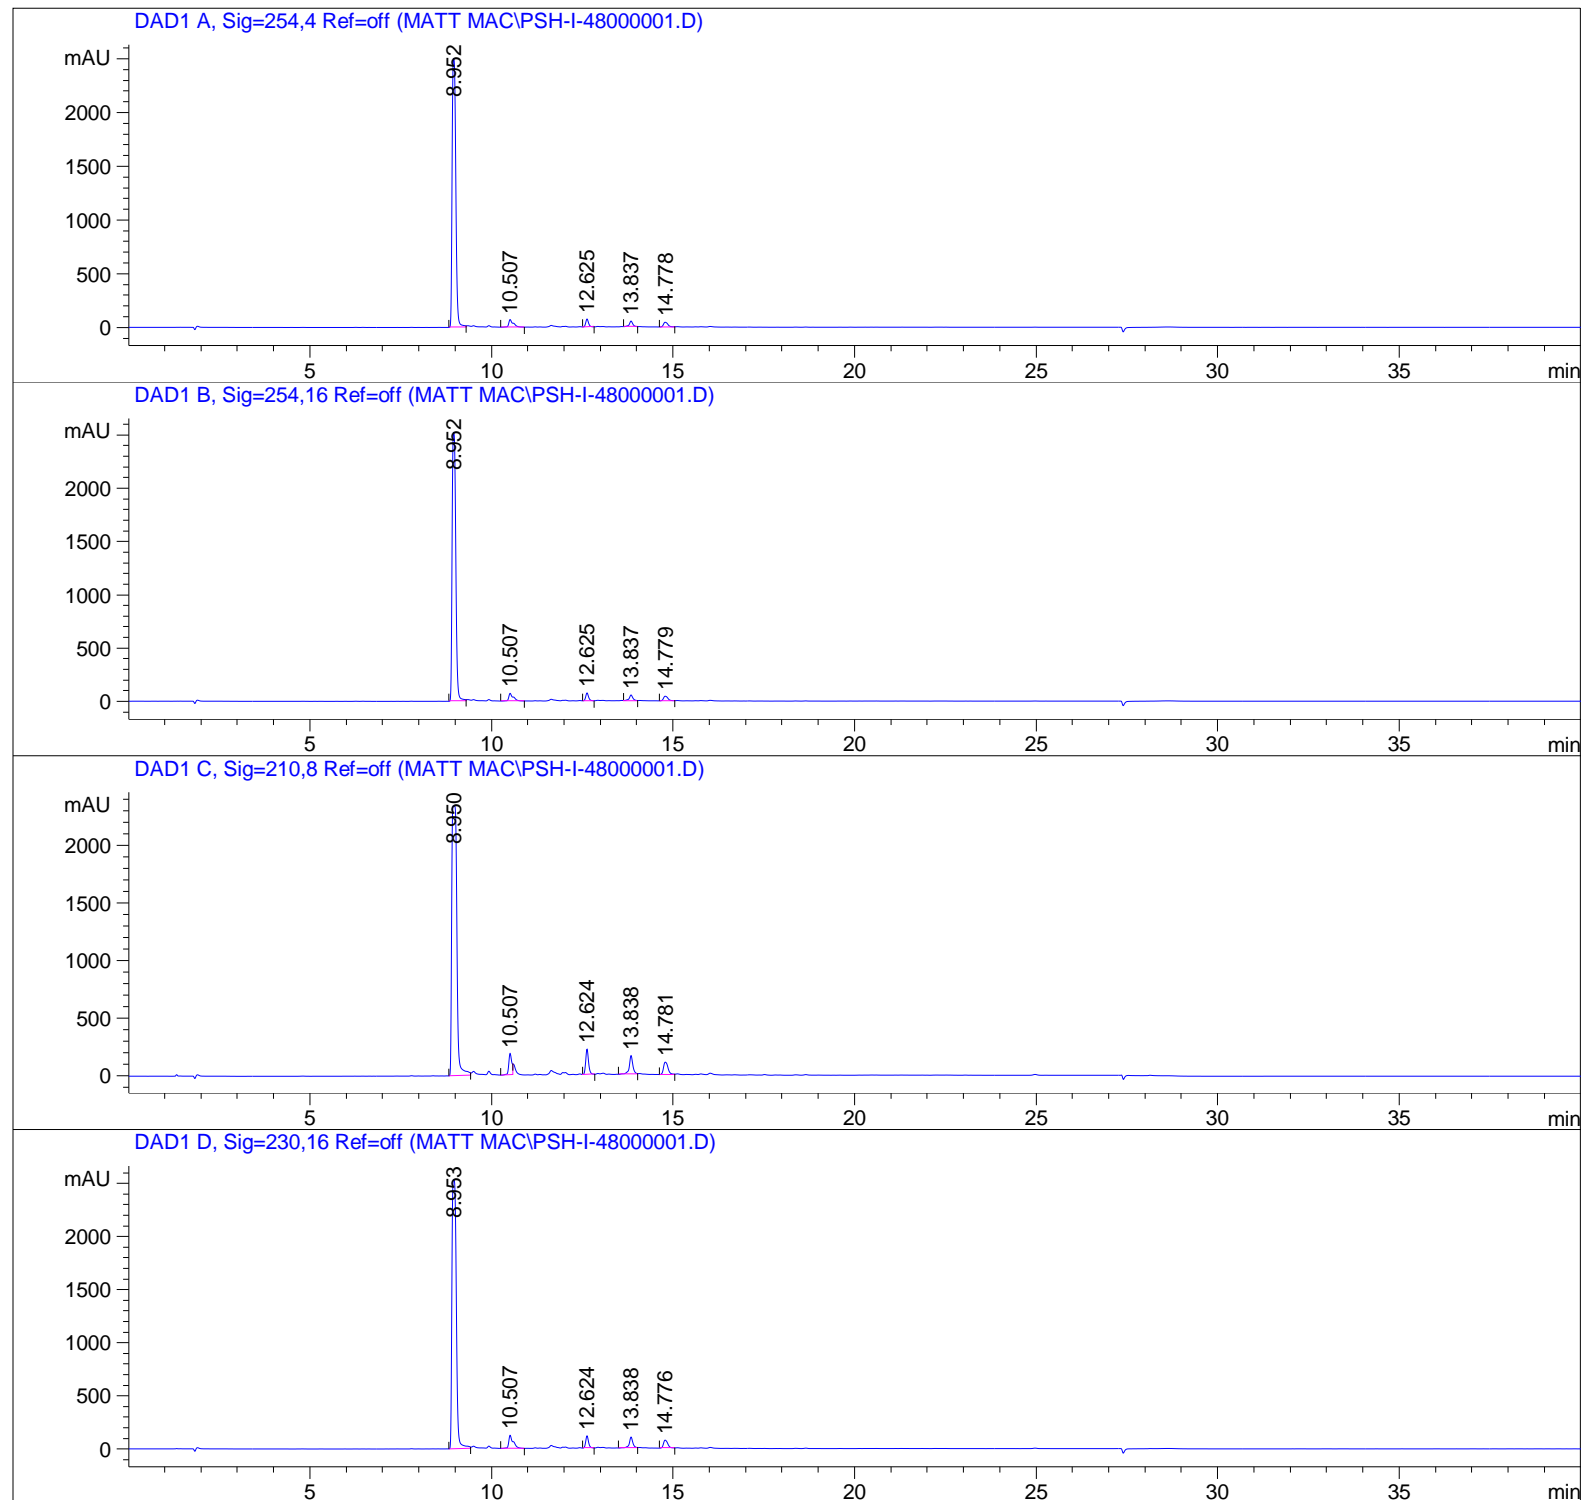

HPLC traces of compound **33**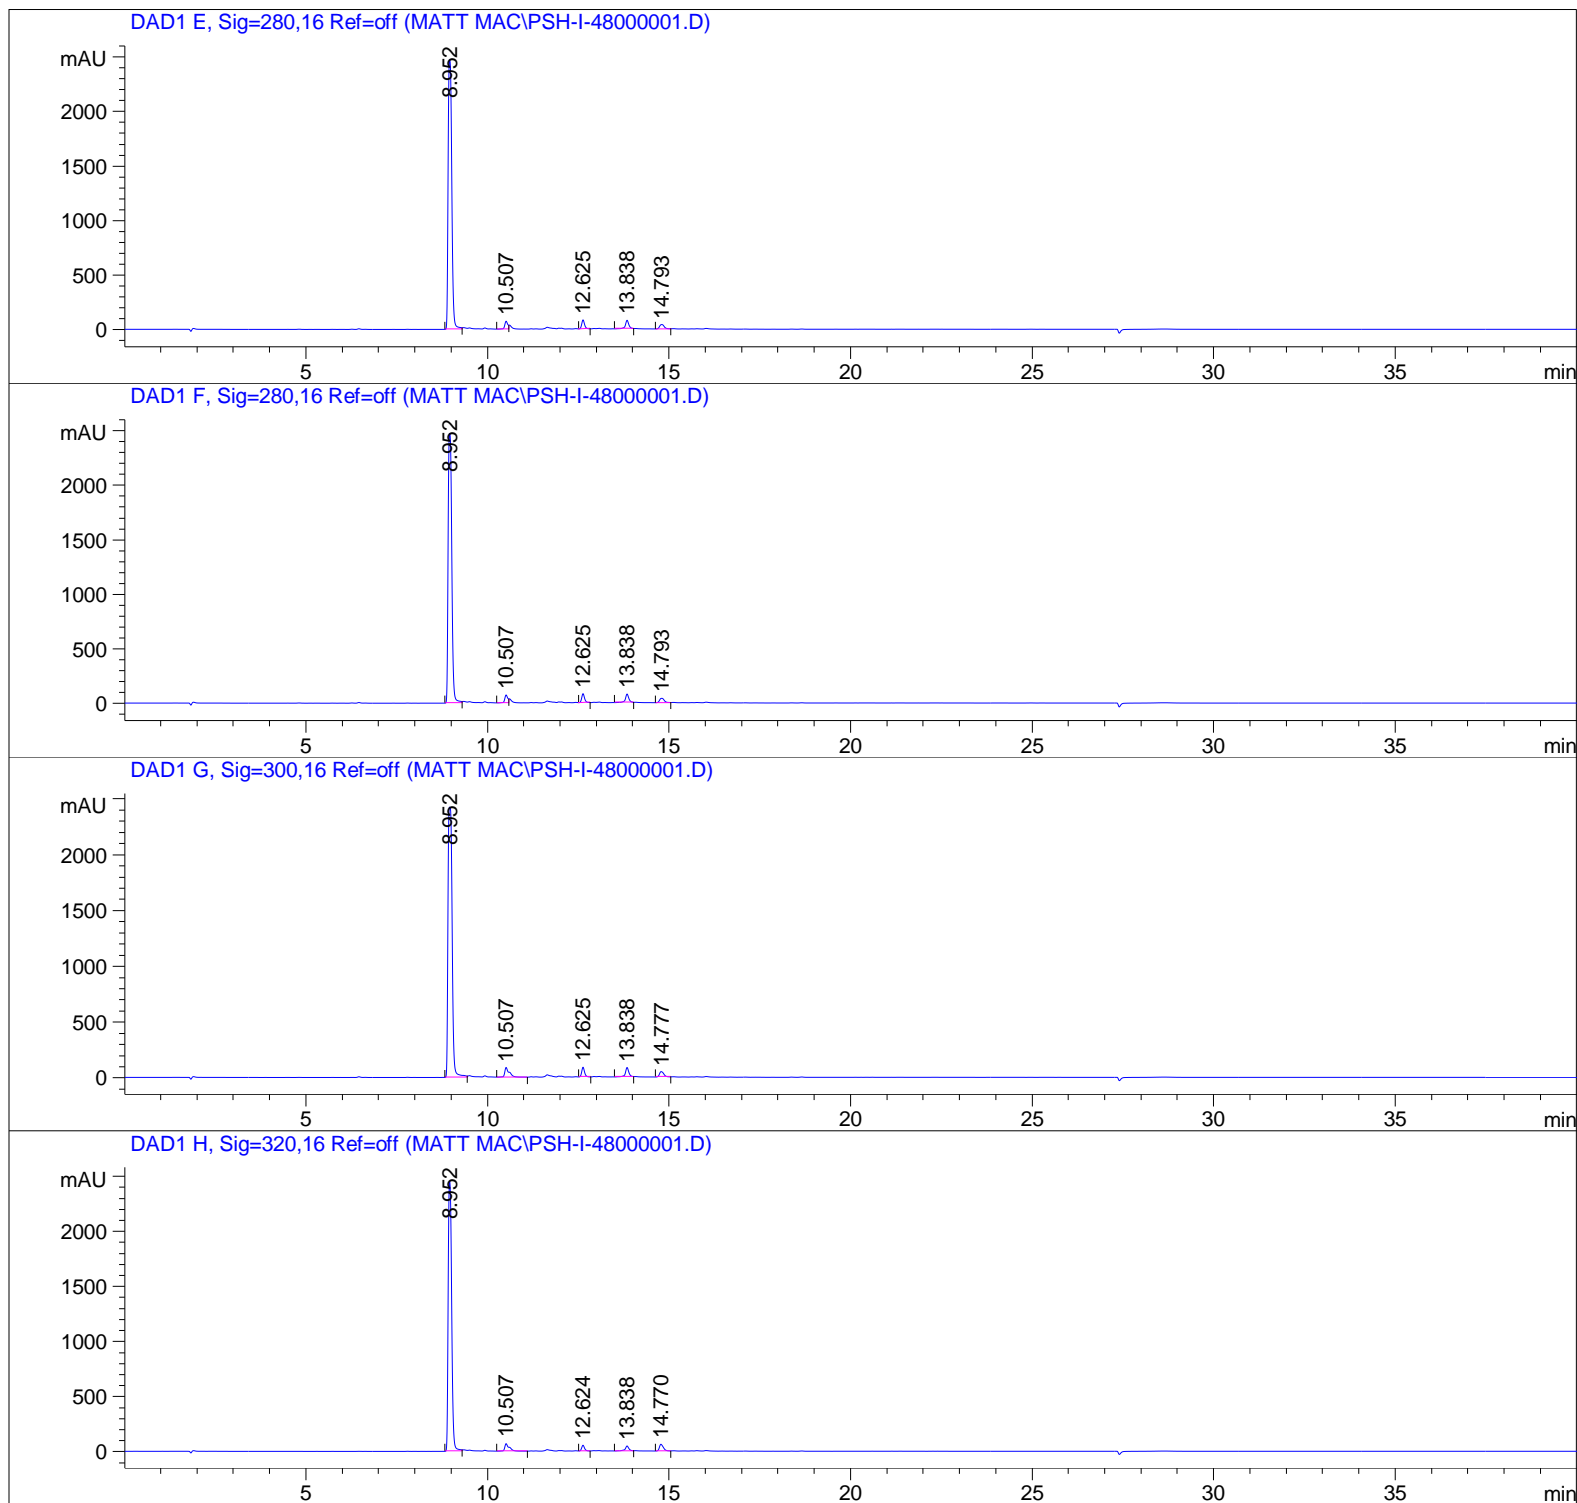=====  
Area Percent Report  
=====

Sorted By : Signal  
Multiplier : 1.0000  
Dilution : 1.0000  
Use Multiplier & Dilution Factor with ISTDs

Sample Name: run1

## HPLC traces of compound 33

Signal 1: DAD1 A, Sig=254,4 Ref=off

| Peak # | RetTime [min] | Type | Width [min] | Area [mAU*s] | Height [mAU] | Area %  |
|--------|---------------|------|-------------|--------------|--------------|---------|
| 1      | 8.952         | BV   | 0.1133      | 1.74400e4    | 2503.49414   | 90.6932 |
| 2      | 10.507        | BB   | 0.1183      | 610.17493    | 70.97384     | 3.1731  |
| 3      | 12.625        | VV   | 0.0842      | 406.46713    | 73.85258     | 2.1138  |
| 4      | 13.837        | VV   | 0.1047      | 393.10352    | 54.14516     | 2.0443  |
| 5      | 14.778        | BV   | 0.1371      | 379.91687    | 43.85746     | 1.9757  |

Totals :                                   1.92296e4   2746.32318

Signal 2: DAD1 B, Sig=254,16 Ref=off

| Peak # | RetTime [min] | Type | Width [min] | Area [mAU*s] | Height [mAU] | Area %  |
|--------|---------------|------|-------------|--------------|--------------|---------|
| 1      | 8.952         | BV   | 0.1130      | 1.75295e4    | 2525.12695   | 90.7013 |
| 2      | 10.507        | BB   | 0.1182      | 618.83783    | 72.06956     | 3.2020  |
| 3      | 12.625        | VV   | 0.0841      | 405.30692    | 73.71142     | 2.0971  |
| 4      | 13.837        | VV   | 0.1050      | 394.96179    | 54.20537     | 2.0436  |
| 5      | 14.779        | BV   | 0.1377      | 378.02029    | 43.34686     | 1.9560  |

Totals :                                   1.93266e4   2768.46016

Signal 3: DAD1 C, Sig=210,8 Ref=off

| Peak # | RetTime [min] | Type | Width [min] | Area [mAU*s] | Height [mAU] | Area %  |
|--------|---------------|------|-------------|--------------|--------------|---------|
| 1      | 8.950         | BV   | 0.1577      | 2.28634e4    | 2345.01953   | 83.7926 |
| 2      | 10.507        | BV   | 0.0861      | 1096.52075   | 187.73811    | 4.0187  |
| 3      | 12.624        | VV   | 0.0843      | 1212.12024   | 219.94164    | 4.4423  |
| 4      | 13.838        | BV   | 0.1033      | 1167.94214   | 163.60349    | 4.2804  |
| 5      | 14.781        | BV   | 0.1384      | 945.71265    | 107.69555    | 3.4660  |

Totals :                                   2.72857e4   3023.99831

Signal 4: DAD1 D, Sig=230,16 Ref=off

| Peak # | RetTime [min] | Type | Width [min] | Area [mAU*s] | Height [mAU] | Area %  |
|--------|---------------|------|-------------|--------------|--------------|---------|
| 1      | 8.953         | BV   | 0.1354      | 2.11507e4    | 2534.16040   | 87.2935 |
| 2      | 10.507        | BB   | 0.1178      | 1058.27429   | 123.76330    | 4.3677  |

Sample Name: run1

## HPLC traces of compound 33

| Peak # | RetTime [min] | Type | Width [min] | Area [mAU*s] | Height [mAU] | Area % |
|--------|---------------|------|-------------|--------------|--------------|--------|
| 3      | 12.624        | VV   | 0.0846      | 639.06421    | 115.47739    | 2.6376 |
| 4      | 13.838        | BV   | 0.1035      | 740.73499    | 103.53637    | 3.0572 |
| 5      | 14.776        | BV   | 0.1350      | 640.64758    | 75.48686     | 2.6441 |

Totals :                                   2.42294e4  2952.42432

Signal 5: DAD1 E, Sig=280,16 Ref=off

| Peak # | RetTime [min] | Type | Width [min] | Area [mAU*s] | Height [mAU] | Area %  |
|--------|---------------|------|-------------|--------------|--------------|---------|
| 1      | 8.952         | BV   | 0.1131      | 1.71869e4    | 2472.61279   | 90.5848 |
| 2      | 10.507        | BV   | 0.0859      | 419.13235    | 72.05910     | 2.2091  |
| 3      | 12.625        | VV   | 0.0840      | 451.04239    | 82.25859     | 2.3773  |
| 4      | 13.838        | BV   | 0.1015      | 549.10632    | 78.58857     | 2.8941  |
| 5      | 14.793        | BV   | 0.1445      | 367.09229    | 40.21583     | 1.9348  |

Totals :                                   1.89733e4  2745.73488

Signal 6: DAD1 F, Sig=280,16 Ref=off

| Peak # | RetTime [min] | Type | Width [min] | Area [mAU*s] | Height [mAU] | Area %  |
|--------|---------------|------|-------------|--------------|--------------|---------|
| 1      | 8.952         | BV   | 0.1131      | 1.71869e4    | 2472.61279   | 90.5848 |
| 2      | 10.507        | BV   | 0.0859      | 419.13235    | 72.05910     | 2.2091  |
| 3      | 12.625        | VV   | 0.0840      | 451.04239    | 82.25859     | 2.3773  |
| 4      | 13.838        | BV   | 0.1015      | 549.10632    | 78.58857     | 2.8941  |
| 5      | 14.793        | BV   | 0.1445      | 367.09229    | 40.21583     | 1.9348  |

Totals :                                   1.89733e4  2745.73488

Signal 7: DAD1 G, Sig=300,16 Ref=off

| Peak # | RetTime [min] | Type | Width [min] | Area [mAU*s] | Height [mAU] | Area %  |
|--------|---------------|------|-------------|--------------|--------------|---------|
| 1      | 8.952         | BV   | 0.1265      | 1.91870e4    | 2420.31030   | 89.6657 |
| 2      | 10.507        | BB   | 0.1181      | 743.72498    | 86.64207     | 3.4756  |
| 3      | 12.625        | VB   | 0.0835      | 472.35669    | 86.76642     | 2.2074  |
| 4      | 13.838        | VV   | 0.1002      | 582.41565    | 84.67338     | 2.7218  |
| 5      | 14.777        | BV   | 0.1360      | 412.87323    | 48.15561     | 1.9295  |

Totals :                                   2.13983e4  2726.54778

Sample Name: run1

## HPLC traces of compound 33

Signal 8: DAD1 H, Sig=320,16 Ref=off

| Peak # | RetTime [min] | Type | Width [min] | Area [mAU*s] | Height [mAU] | Area %  |
|--------|---------------|------|-------------|--------------|--------------|---------|
| 1      | 8.952         | BV   | 0.1054      | 1.62748e4    | 2453.87549   | 90.6305 |
| 2      | 10.507        | BB   | 0.1190      | 586.09778    | 67.68012     | 3.2638  |
| 3      | 12.624        | VV   | 0.0850      | 289.21191    | 51.90499     | 1.6106  |
| 4      | 13.838        | BV   | 0.1074      | 337.07236    | 44.99344     | 1.8771  |
| 5      | 14.770        | BV   | 0.1219      | 470.12784    | 61.00558     | 2.6180  |

Totals :                                   1.79573e4  2679.45962

=====  
\*\*\* End of Report \*\*\*

# HRMS of compound 33

C:\Xcalibur\...Matt\2-10-2013\PSH-I48

2/10/2013 8:21:48 PM

PSH-I48

PSH-I48 #20 RT: 0.16 AV: 1 NL: 7.60E7

T: FTMS + p ESI Full ms [200.00-2000.00]

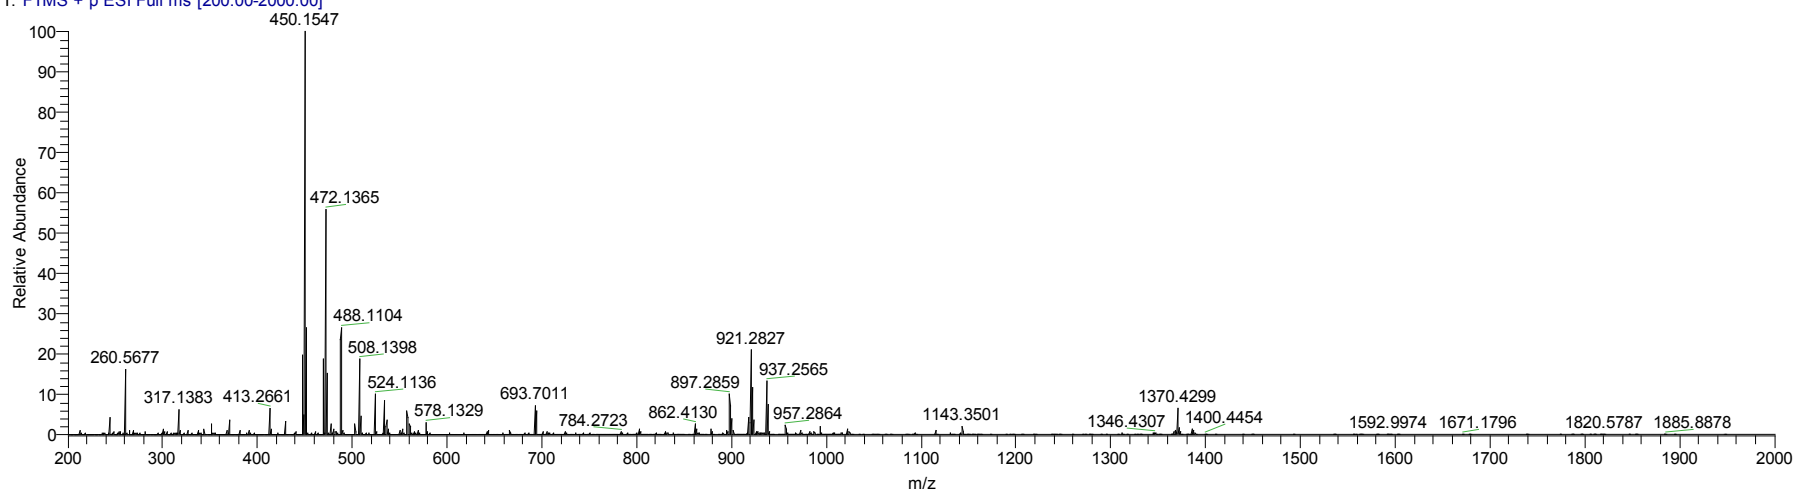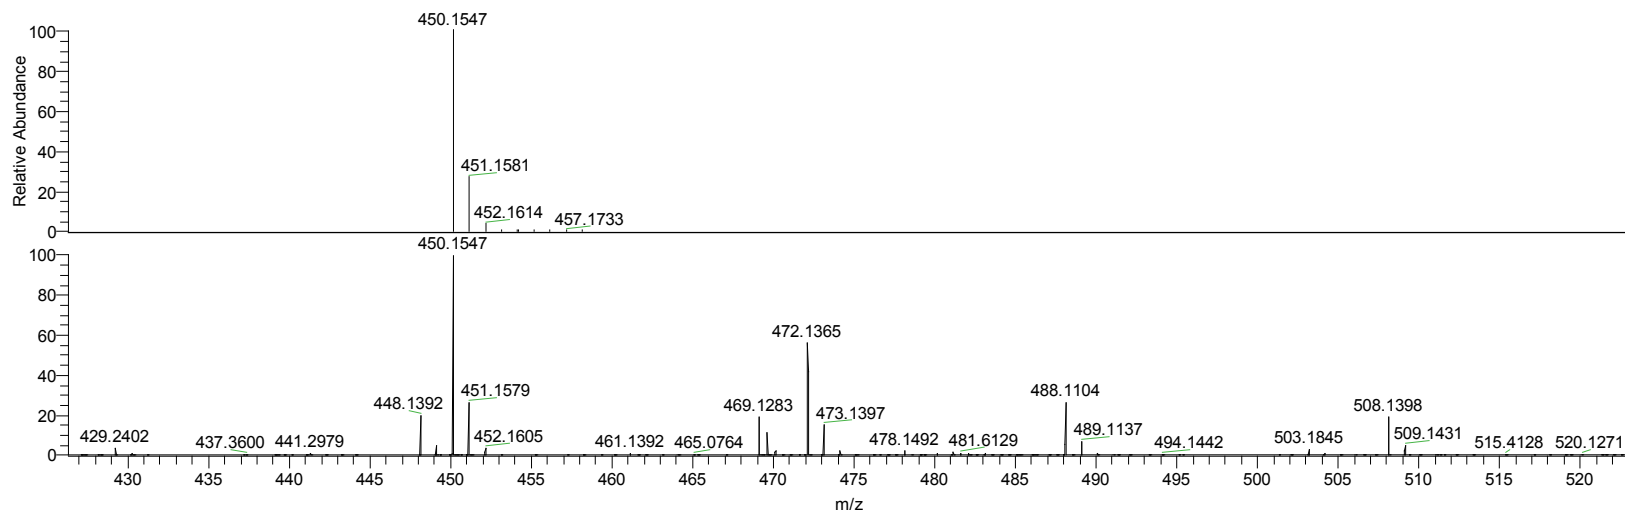

NL:  
7.46E5  
C<sub>25</sub>H<sub>24</sub>O<sub>7</sub>N:  
C<sub>25</sub>H<sub>24</sub>O<sub>7</sub>N<sub>1</sub>  
pa Chrg 1

NL:  
7.60E7  
PSH-I48#20 RT:  
0.16 AV: 1 T:  
FTMS + p ESI Full  
ms  
[200.00-2000.00]



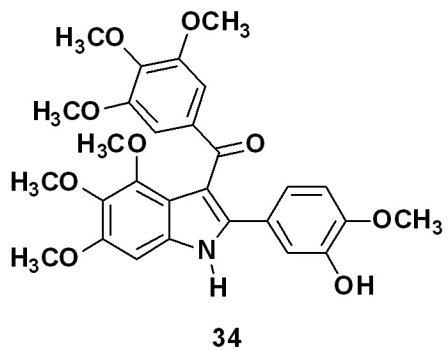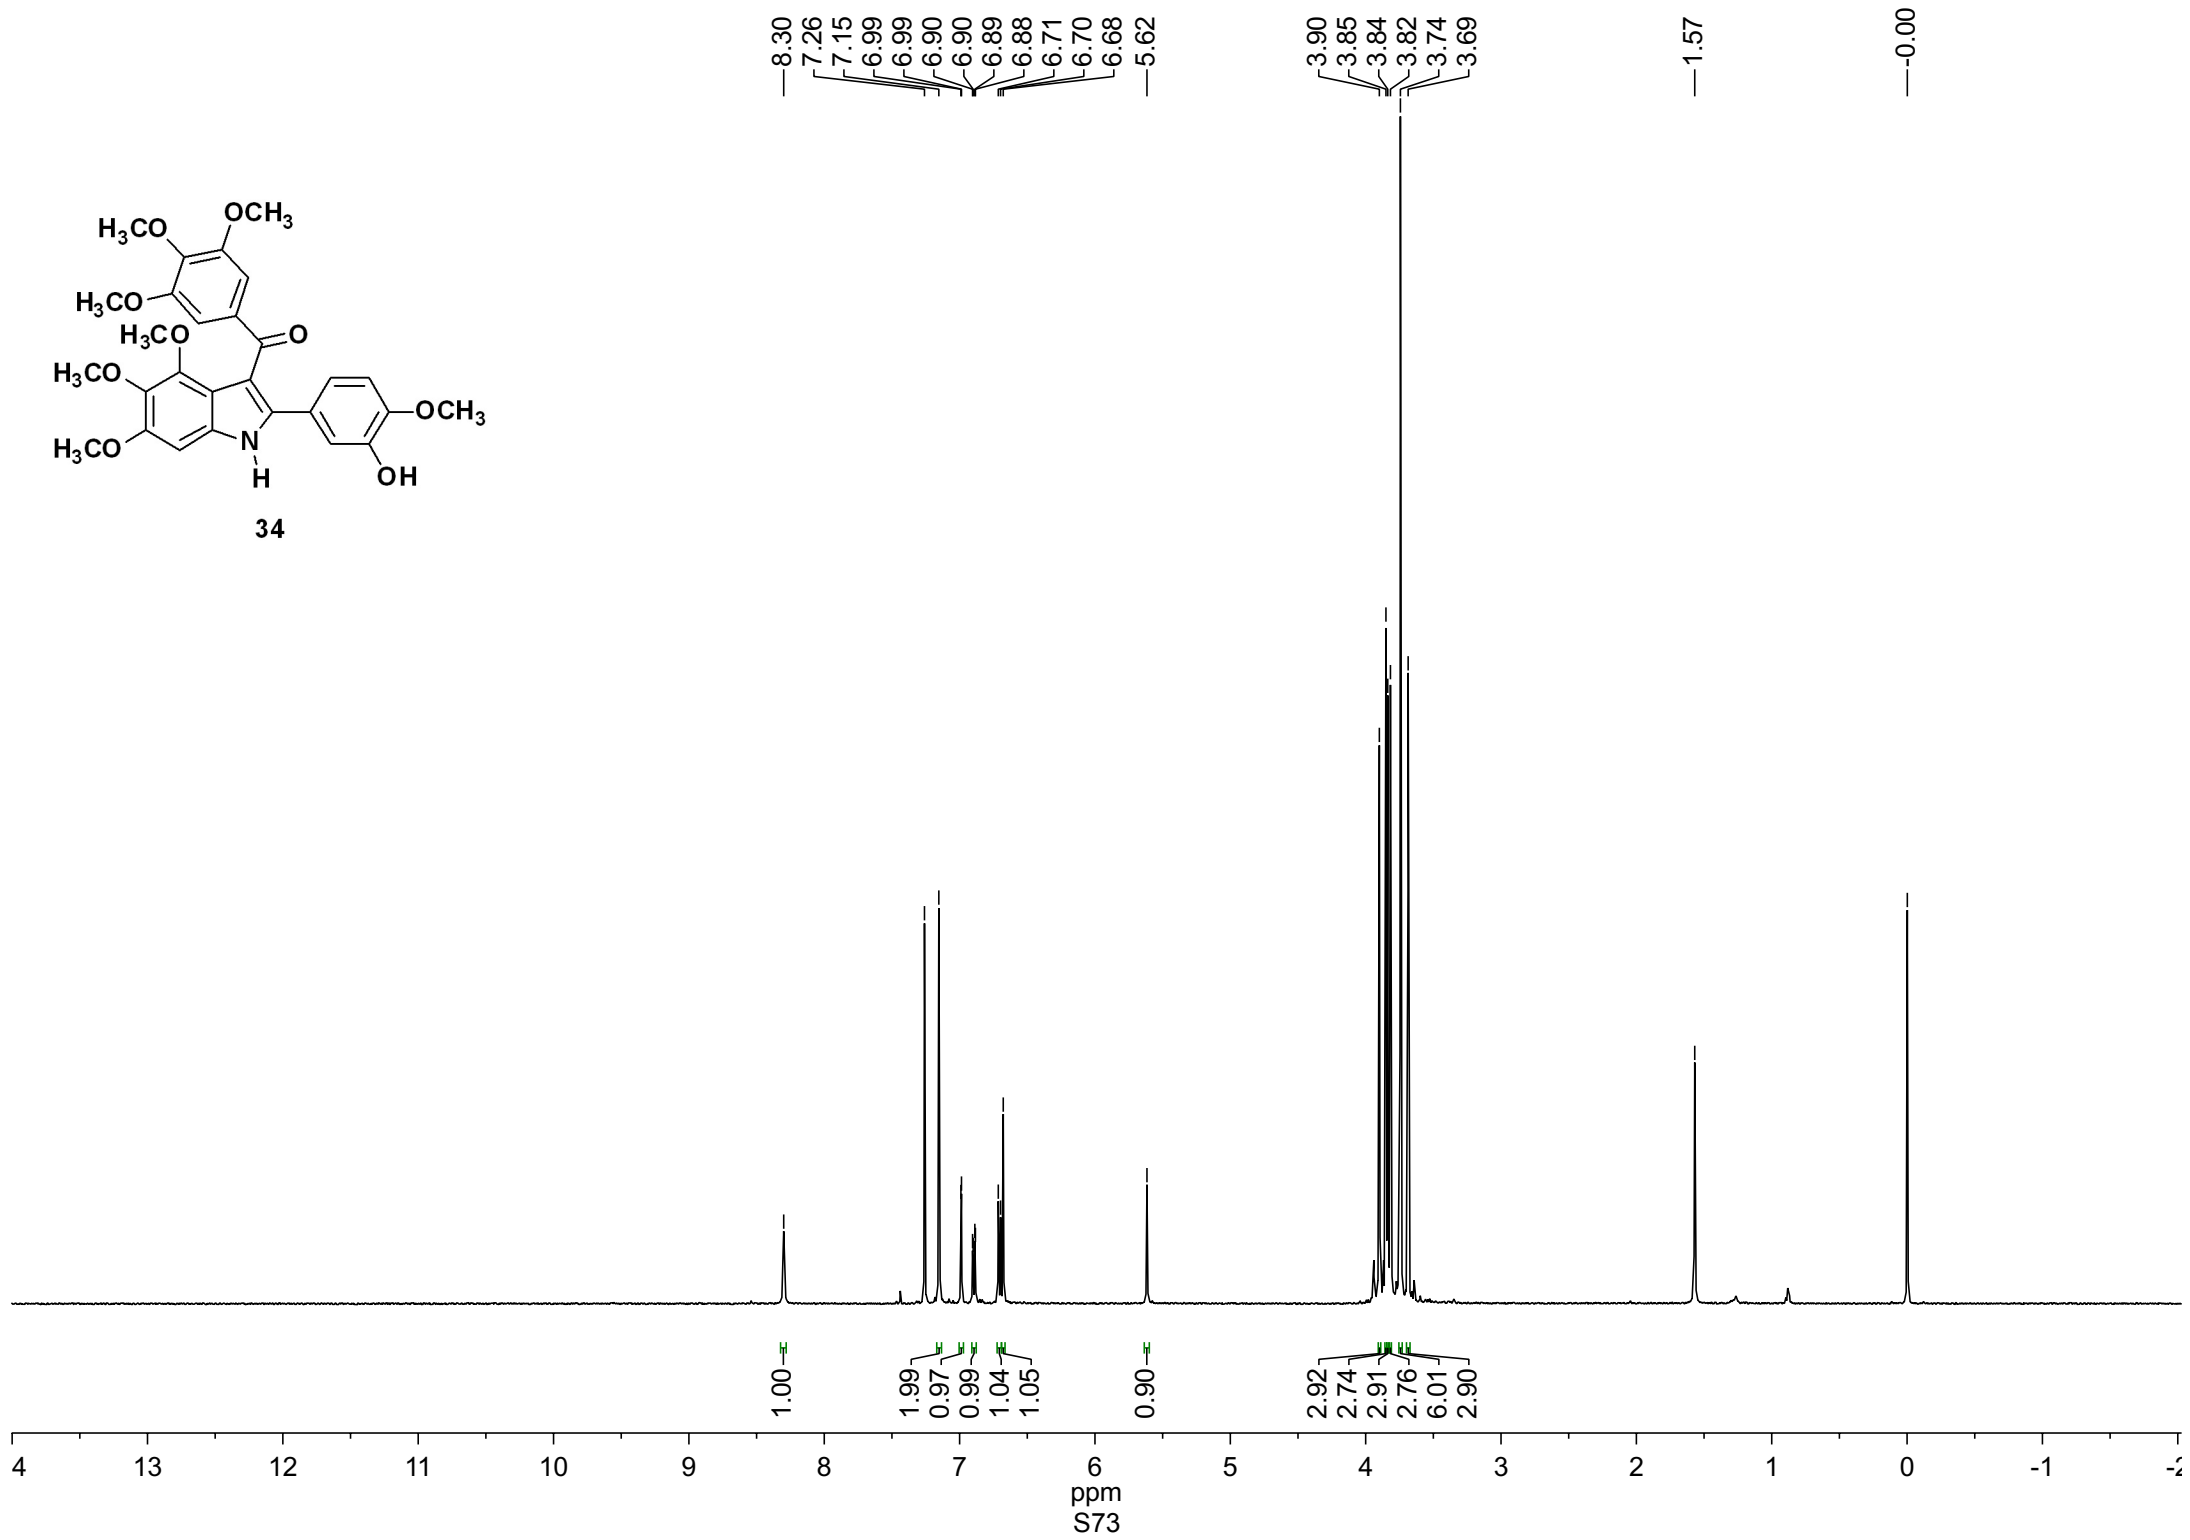

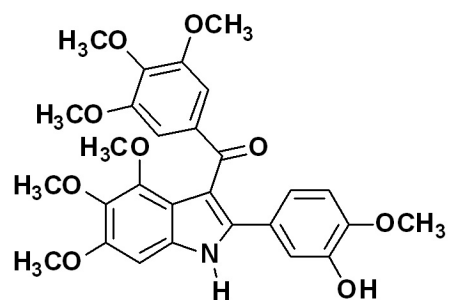

— 193.44

152.83  
152.16  
146.84  
146.48  
145.84  
142.11  
137.80  
137.04  
134.57  
132.36  
125.14  
120.48  
116.56  
113.68  
112.59  
110.94  
107.50

— 89.73

77.41  
77.46  
76.91

61.37  
61.00  
60.78  
56.40  
56.33  
56.07

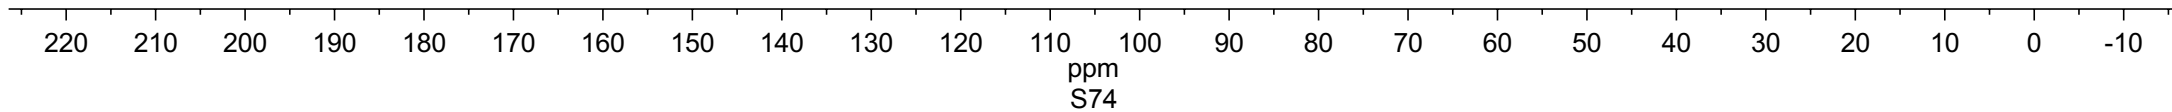

Sample Name: run1

HPLC traces of compound **34**

=====  
Acq. Operator : Matt Mac  
Acq. Instrument : Instrument 1 Location : -  
Injection Date : 1/7/2013 4:14:42 PM  
Acq. Method : C:\CHEM32\1\METHODS\MASTERMETHOD.M  
Last changed : 1/7/2013 4:13:16 PM by Matt Mac  
(modified after loading)  
Analysis Method : C:\CHEM32\1\METHODS\MASTERMETHOD.M  
Last changed : 1/3/2013 5:04:04 PM by Laxman

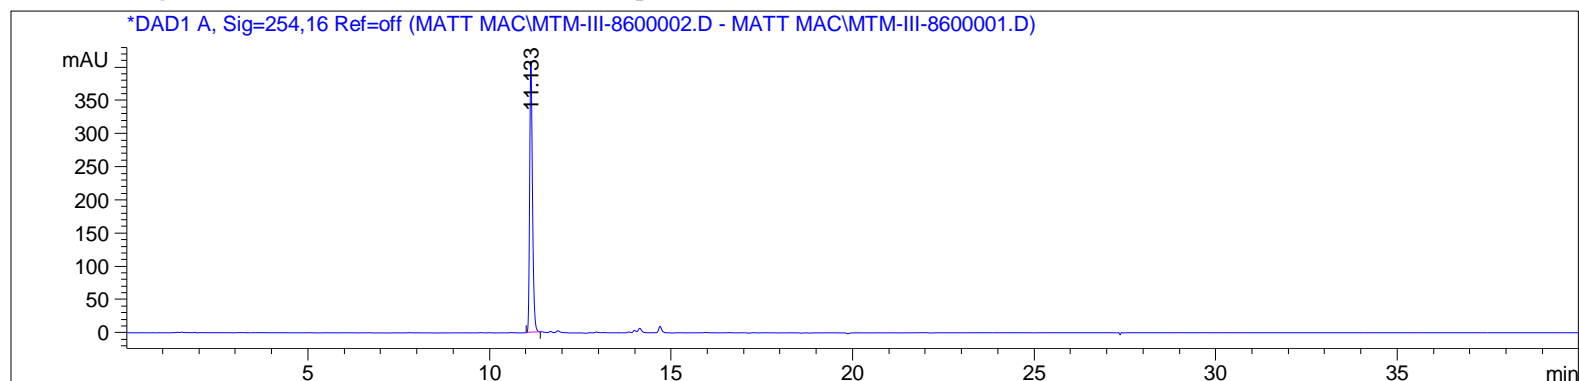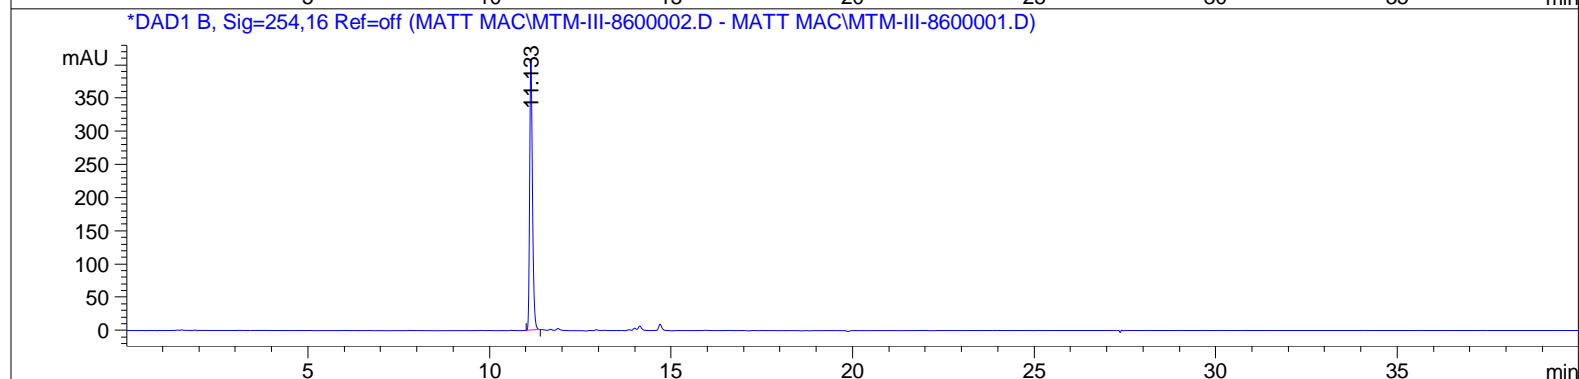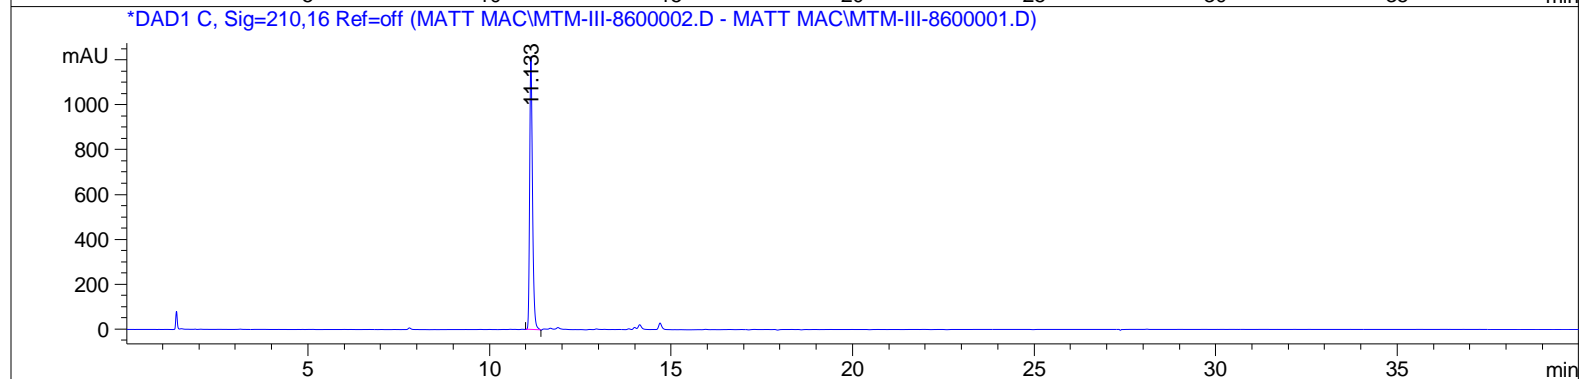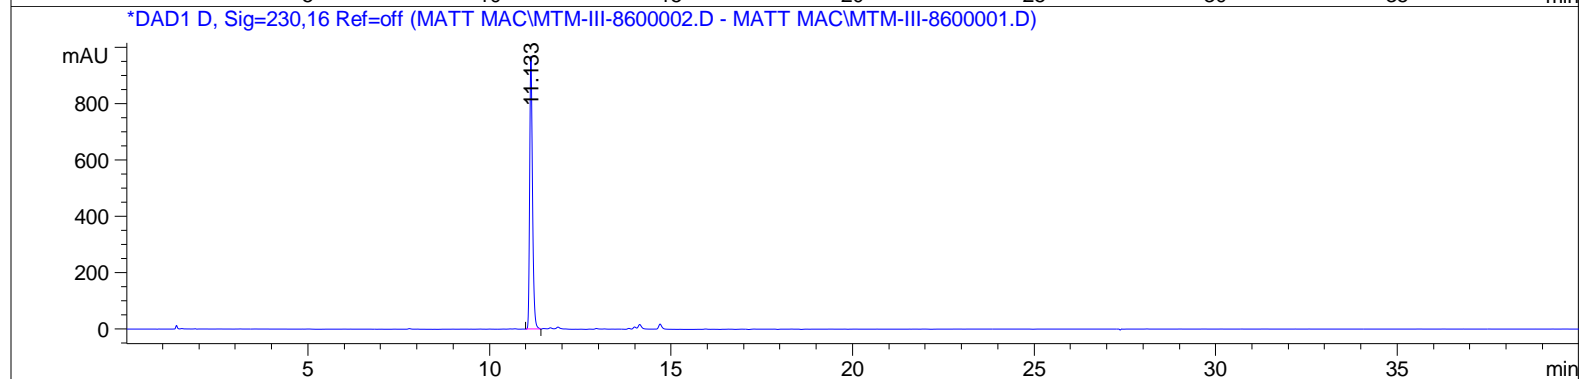

Sample Name: run1

## HPLC traces of compound 34

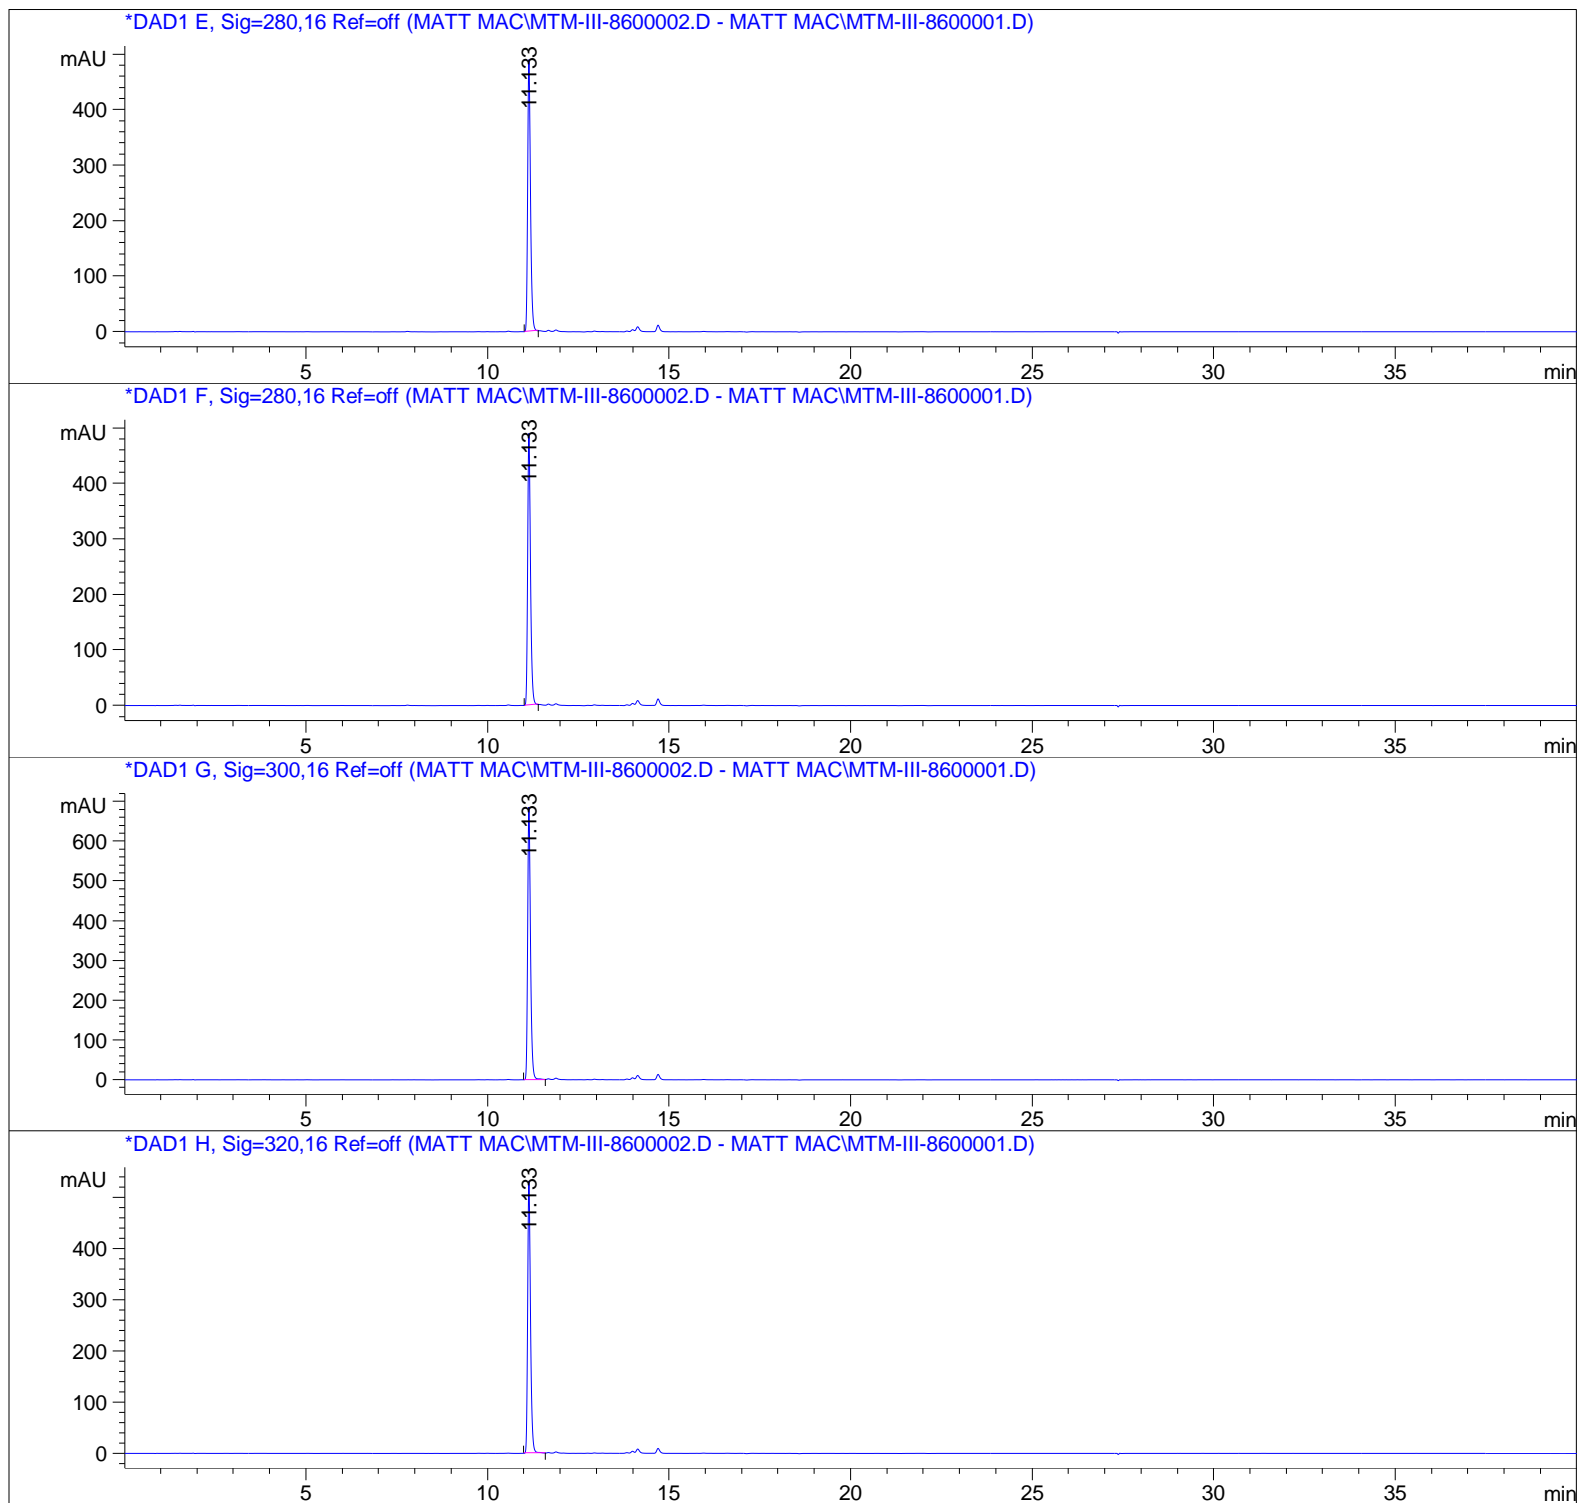=====  
Area Percent Report  
=====

Sorted By : Signal  
Multiplier : 1.0000  
Dilution : 1.0000  
Use Multiplier & Dilution Factor with ISTDs

Sample Name: run1

HPLC traces of compound 34

Signal 1: DAD1 A, Sig=254,16 Ref=off

Signal has been modified after loading from rawdata file!

| Peak # | RetTime [min] | Type | Width [min] | Area [mAU*s] | Height [mAU] | Area %   |
|--------|---------------|------|-------------|--------------|--------------|----------|
| 1      | 11.133        | BB   | 0.0810      | 2210.16919   | 409.56378    | 100.0000 |

Totals : 2210.16919 409.56378

Signal 2: DAD1 B, Sig=254,16 Ref=off

Signal has been modified after loading from rawdata file!

| Peak # | RetTime [min] | Type | Width [min] | Area [mAU*s] | Height [mAU] | Area %   |
|--------|---------------|------|-------------|--------------|--------------|----------|
| 1      | 11.133        | BB   | 0.0810      | 2210.16919   | 409.56378    | 100.0000 |

Totals : 2210.16919 409.56378

Signal 3: DAD1 C, Sig=210,16 Ref=off

Signal has been modified after loading from rawdata file!

| Peak # | RetTime [min] | Type | Width [min] | Area [mAU*s] | Height [mAU] | Area %   |
|--------|---------------|------|-------------|--------------|--------------|----------|
| 1      | 11.133        | VB   | 0.0817      | 6658.21045   | 1218.85291   | 100.0000 |

Totals : 6658.21045 1218.85291

Signal 4: DAD1 D, Sig=230,16 Ref=off

Signal has been modified after loading from rawdata file!

| Peak # | RetTime [min] | Type | Width [min] | Area [mAU*s] | Height [mAU] | Area %   |
|--------|---------------|------|-------------|--------------|--------------|----------|
| 1      | 11.133        | BB   | 0.0815      | 5278.77148   | 970.38177    | 100.0000 |

Totals : 5278.77148 970.38177

Sample Name: run1

## HPLC traces of compound 34

Signal 5: DAD1 E, Sig=280,16 Ref=off

Signal has been modified after loading from rawdata file!

| Peak # | RetTime [min] | Type | Width [min] | Area [mAU*s] | Height [mAU] | Area %   |
|--------|---------------|------|-------------|--------------|--------------|----------|
| 1      | 11.133        | BB   | 0.0809      | 2644.89453   | 490.63278    | 100.0000 |

Totals : 2644.89453 490.63278

Signal 6: DAD1 F, Sig=280,16 Ref=off

Signal has been modified after loading from rawdata file!

| Peak # | RetTime [min] | Type | Width [min] | Area [mAU*s] | Height [mAU] | Area %   |
|--------|---------------|------|-------------|--------------|--------------|----------|
| 1      | 11.133        | BB   | 0.0809      | 2644.89453   | 490.63278    | 100.0000 |

Totals : 2644.89453 490.63278

Signal 7: DAD1 G, Sig=300,16 Ref=off

Signal has been modified after loading from rawdata file!

| Peak # | RetTime [min] | Type | Width [min] | Area [mAU*s] | Height [mAU] | Area %   |
|--------|---------------|------|-------------|--------------|--------------|----------|
| 1      | 11.133        | BV   | 0.0816      | 3745.30640   | 686.99261    | 100.0000 |

Totals : 3745.30640 686.99261

Signal 8: DAD1 H, Sig=320,16 Ref=off

Signal has been modified after loading from rawdata file!

| Peak # | RetTime [min] | Type | Width [min] | Area [mAU*s] | Height [mAU] | Area %   |
|--------|---------------|------|-------------|--------------|--------------|----------|
| 1      | 11.133        | BV   | 0.0815      | 2904.22461   | 533.46991    | 100.0000 |

Totals : 2904.22461 533.46991

=====  
\*\*\* End of Report \*\*\*

# HRMS of compound 34

C:\Xcalibur\...2-10-2013\MTM-III-86

2/10/2013 4:13:03 PM

MTM-III-86

MTM-III-86 #20 RT: 0.17 AV: 1 NL: 7.70E6  
T: FTMS + p ESI Full ms [200.00-2000.00]

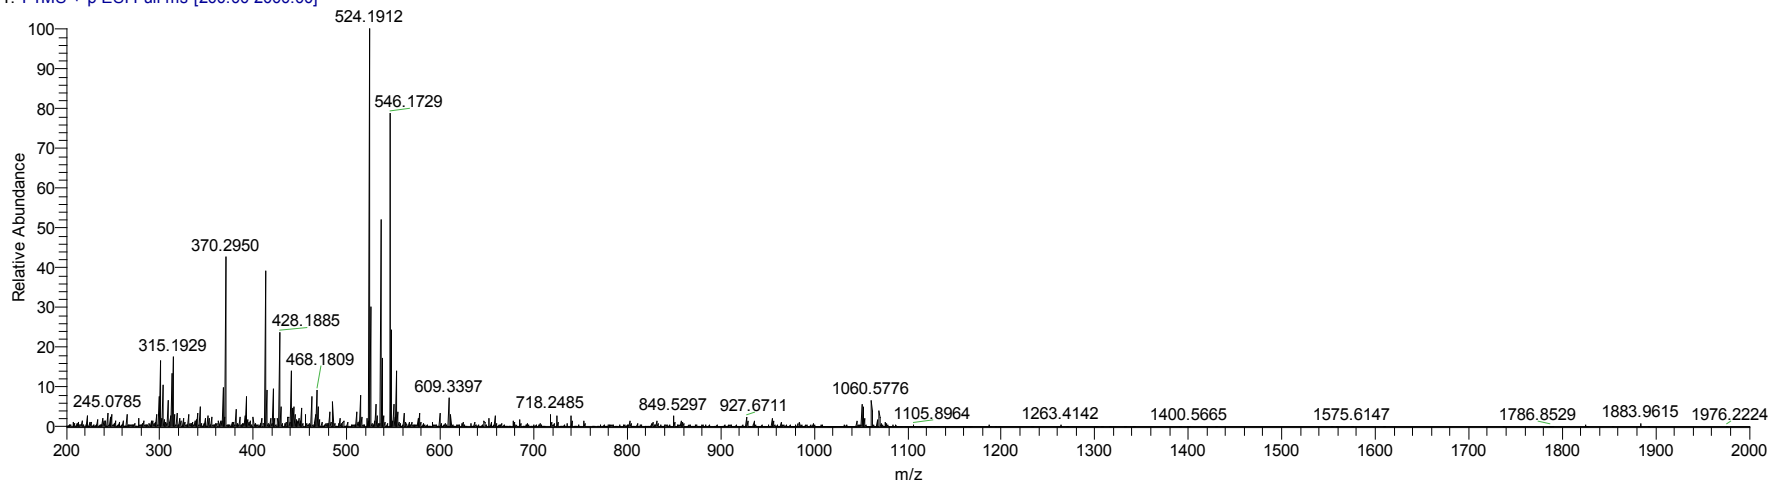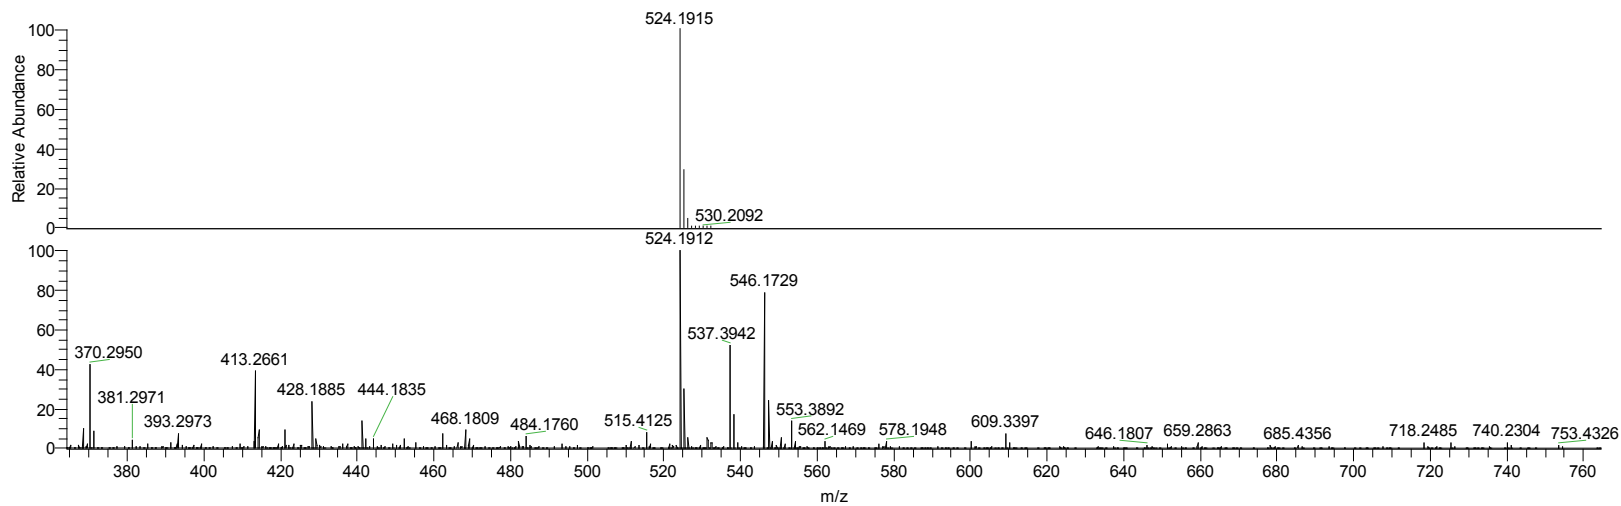

NL:  
7.17E5  
C<sub>27</sub>H<sub>24</sub>O<sub>4</sub>N<sub>8</sub>:  
C<sub>27</sub>H<sub>24</sub>O<sub>4</sub>N<sub>8</sub>  
pa Chrg 1

NL:  
7.70E6  
MTM-III-86#20 RT:  
0.17 AV: 1 T:  
FTMS + p ESI Full  
ms  
[200.00-2000.00]

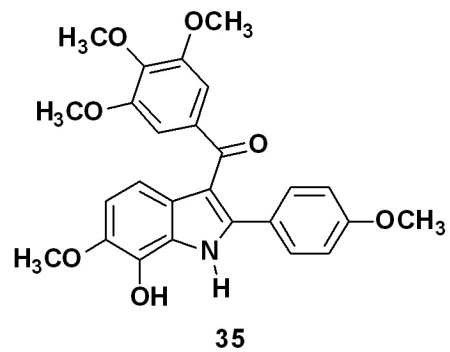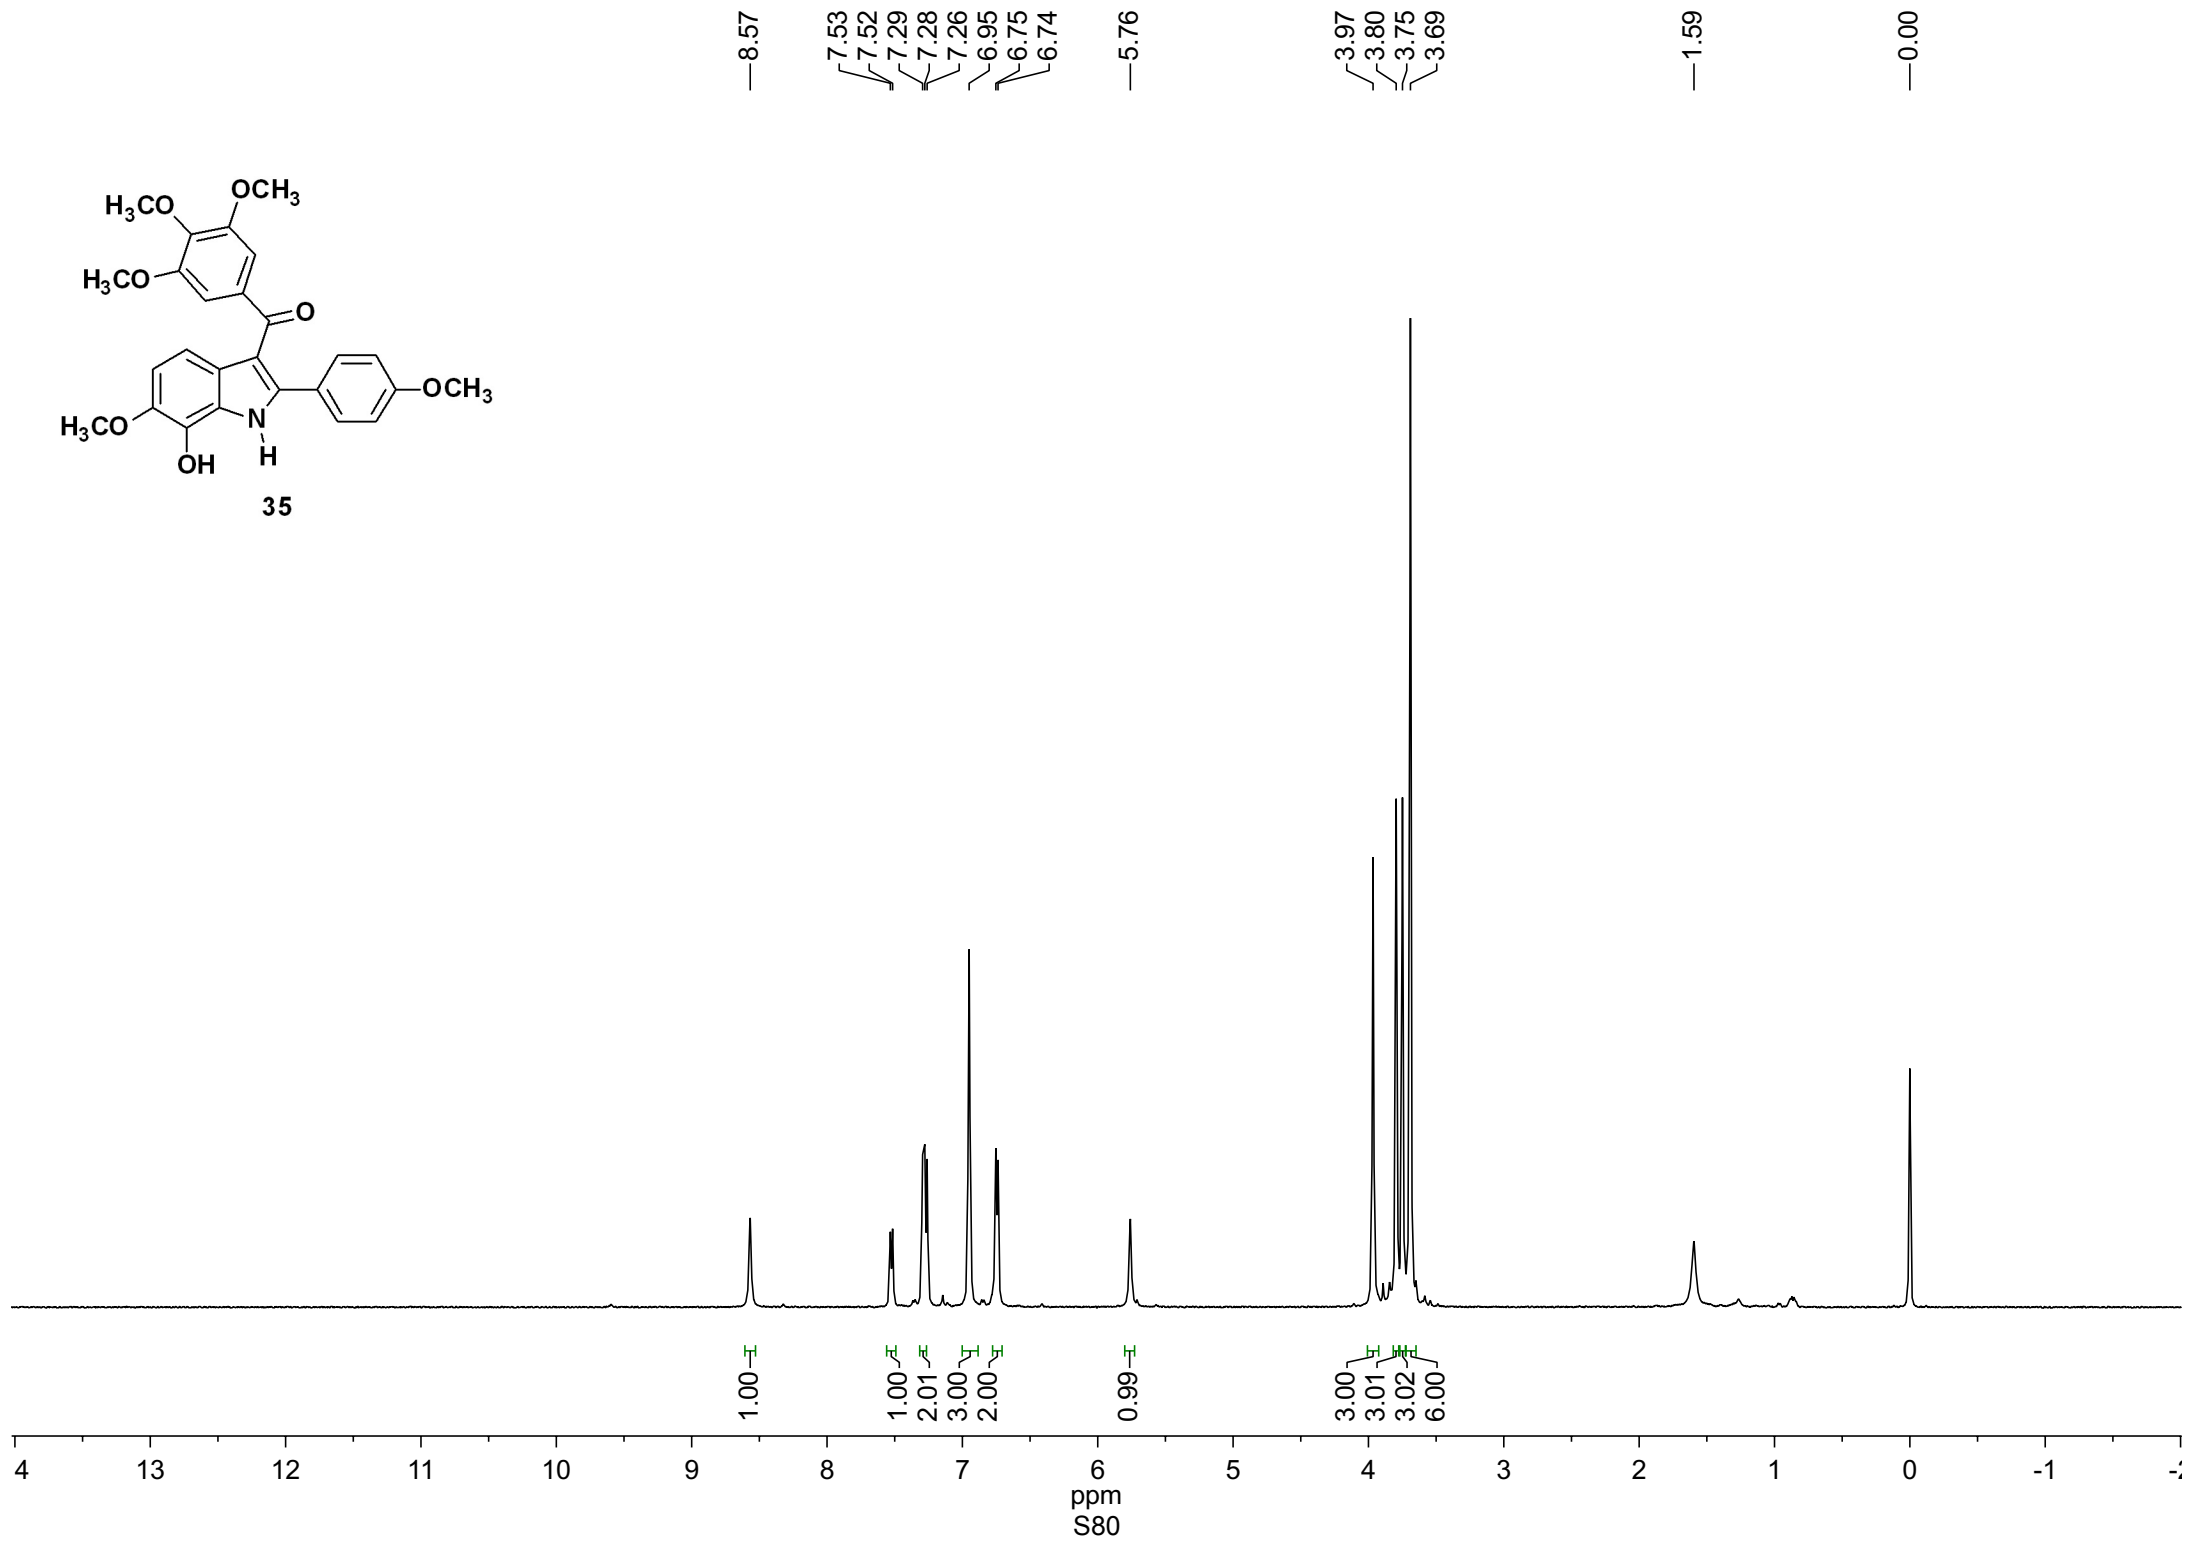



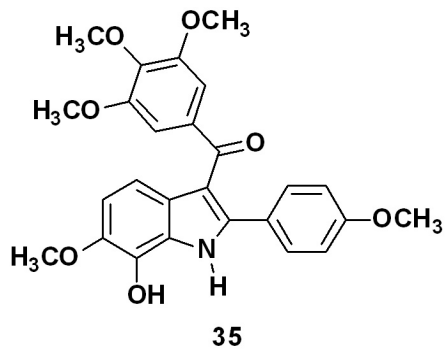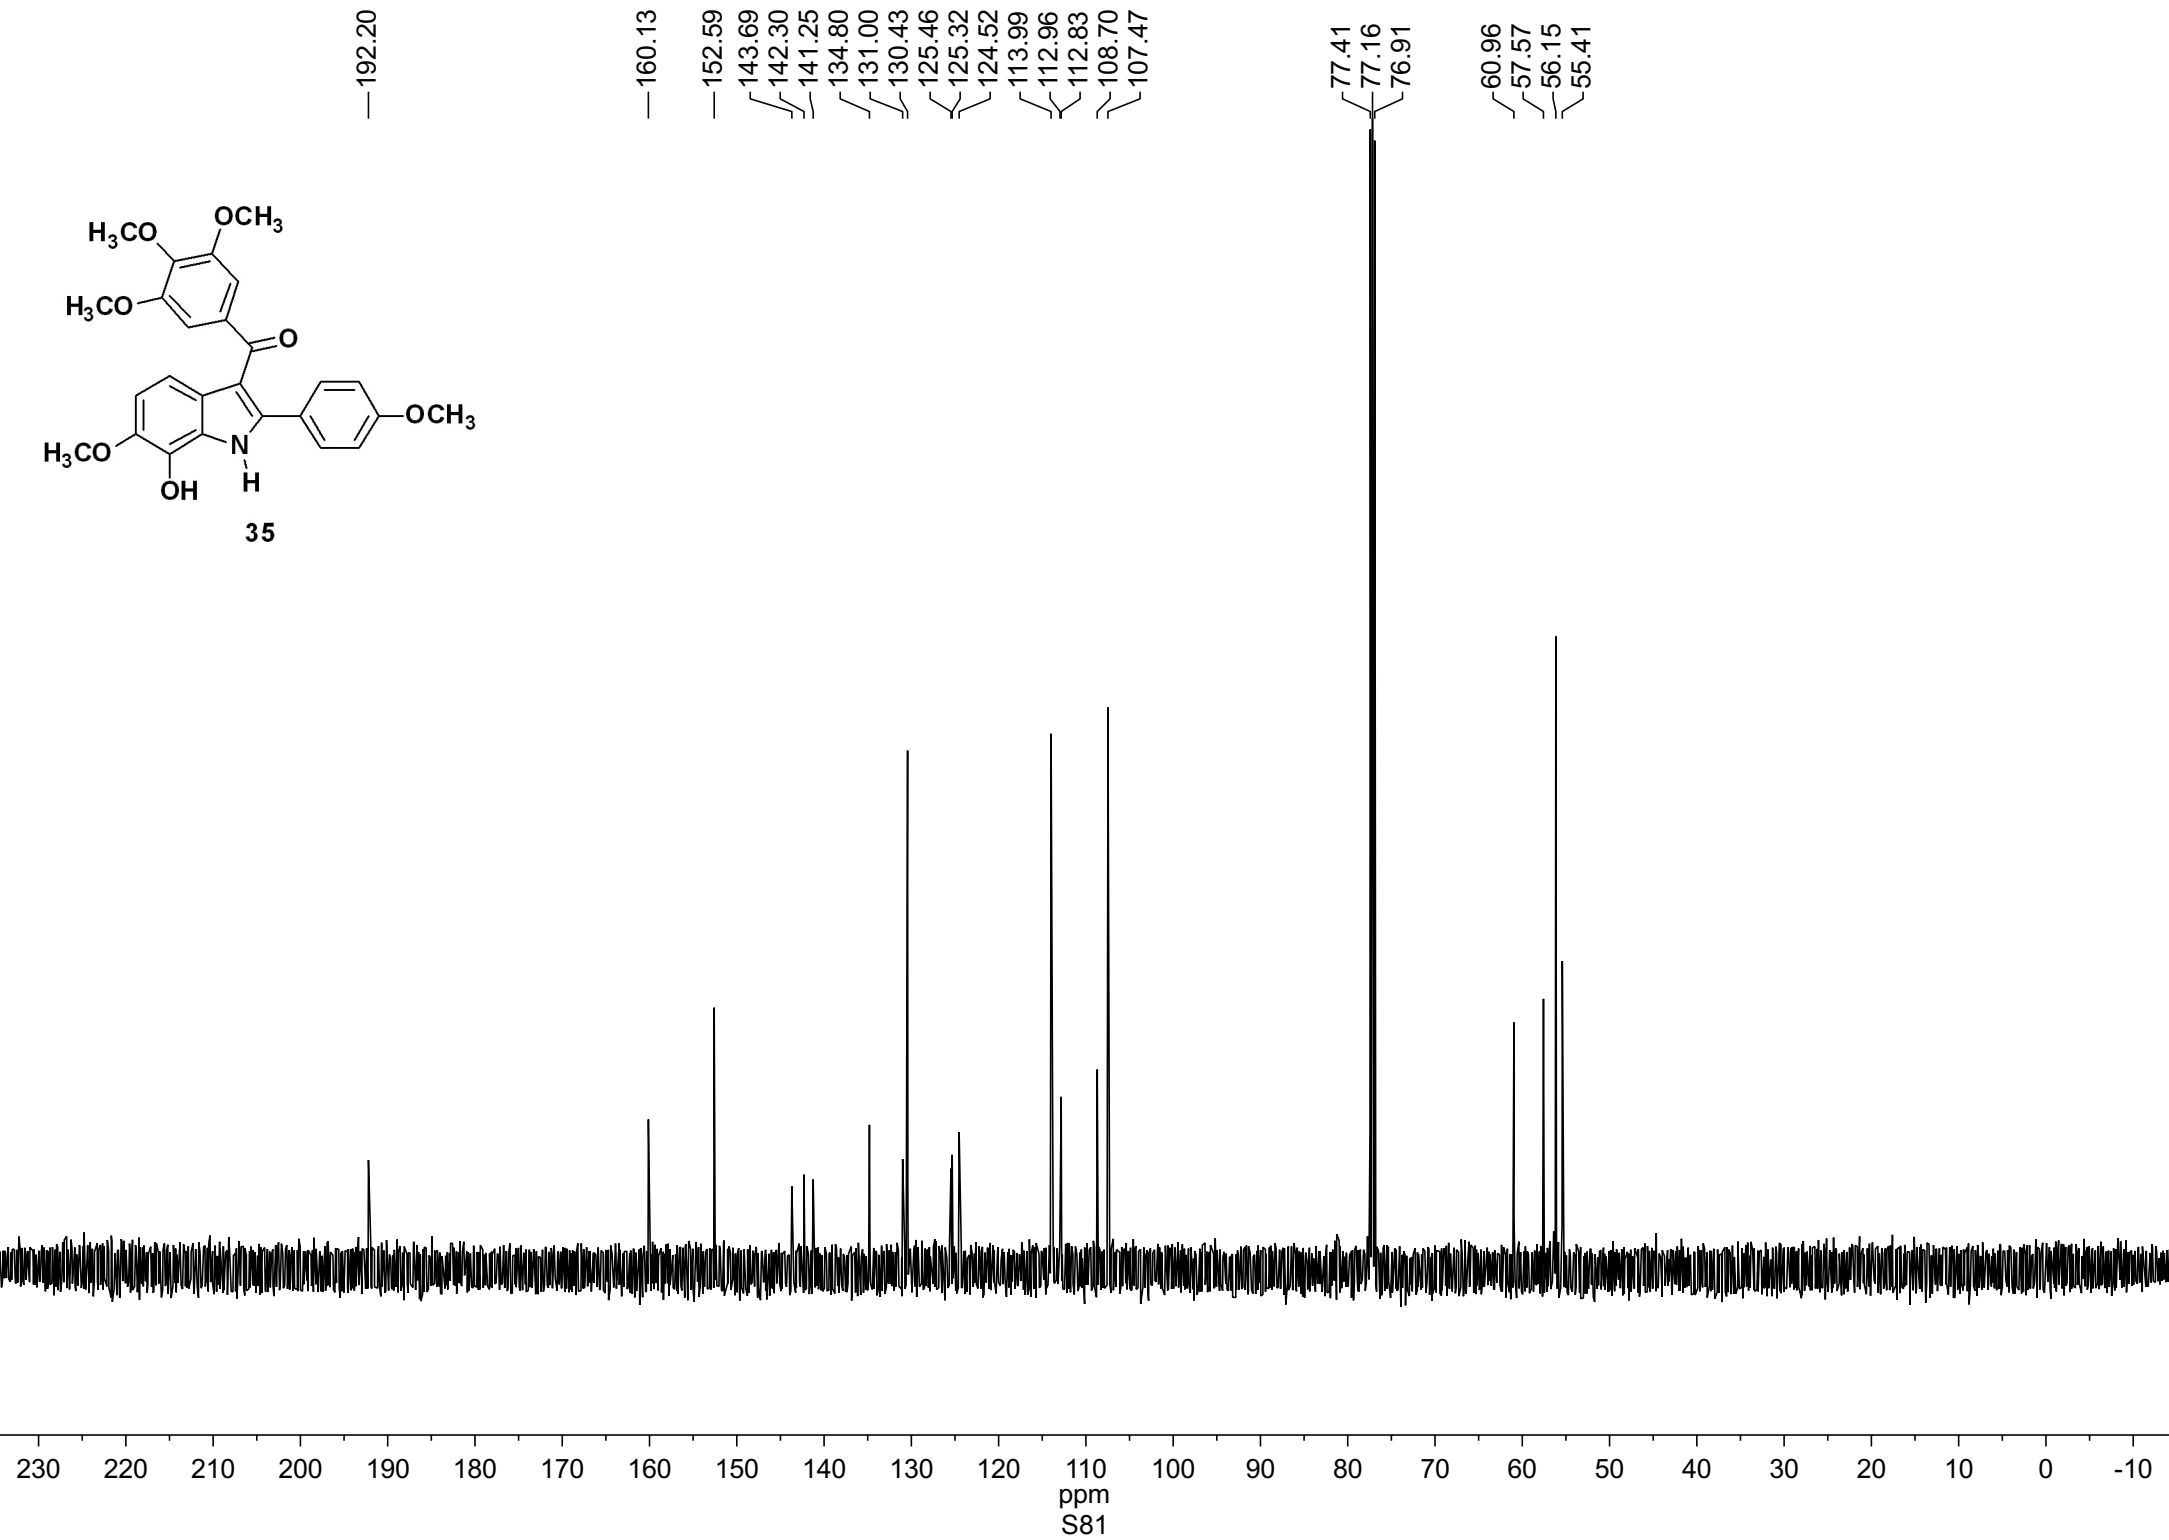

Sample Name: run1

## HPLC traces of compound 35

=====  
Acq. Operator : Matt Mac  
Acq. Instrument : Instrument 1 Location : -  
Injection Date : 1/25/2013 3:29:20 PM  
Acq. Method : C:\CHEM32\1\METHODS\MASTERMETHOD.M  
Last changed : 1/25/2013 3:22:08 PM by Matt Mac  
Analysis Method : C:\CHEM32\1\DATA\MATT MAC\MTM-V-58000002.D\DA.M (MASTERMETHOD.M)  
Last changed : 1/25/2013 4:52:52 PM by Matt Mac  
Sample Info :

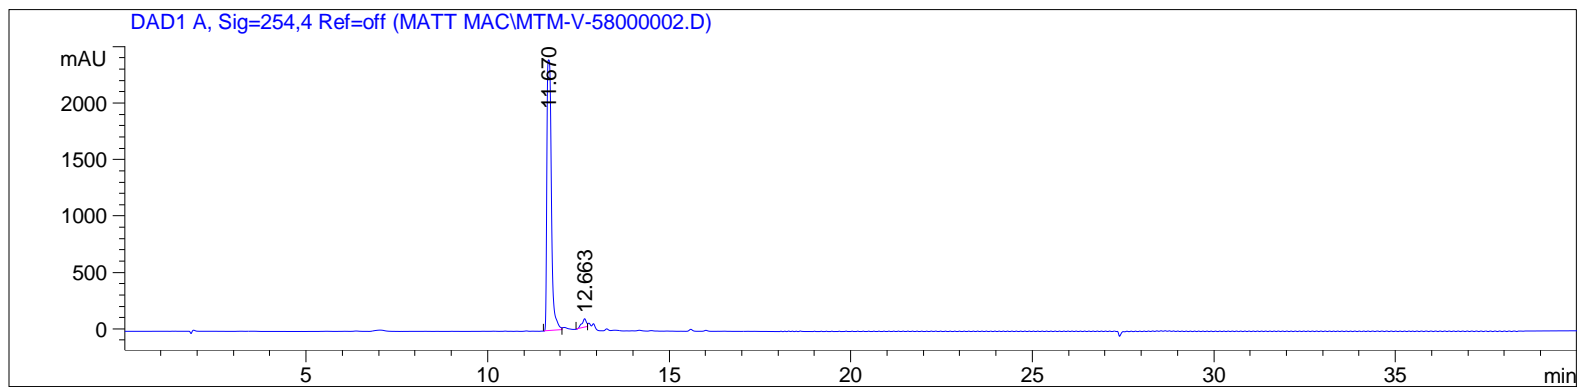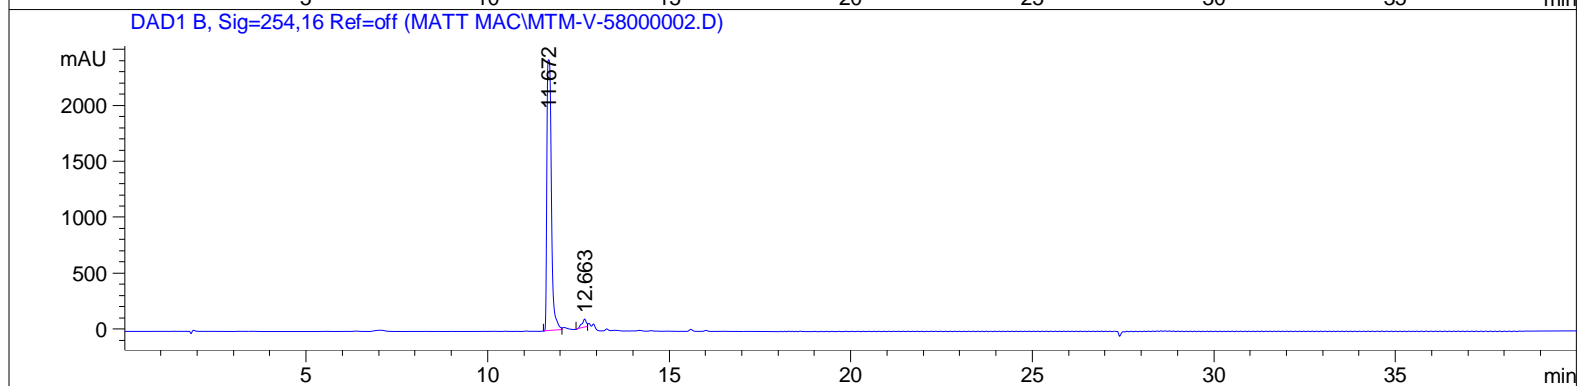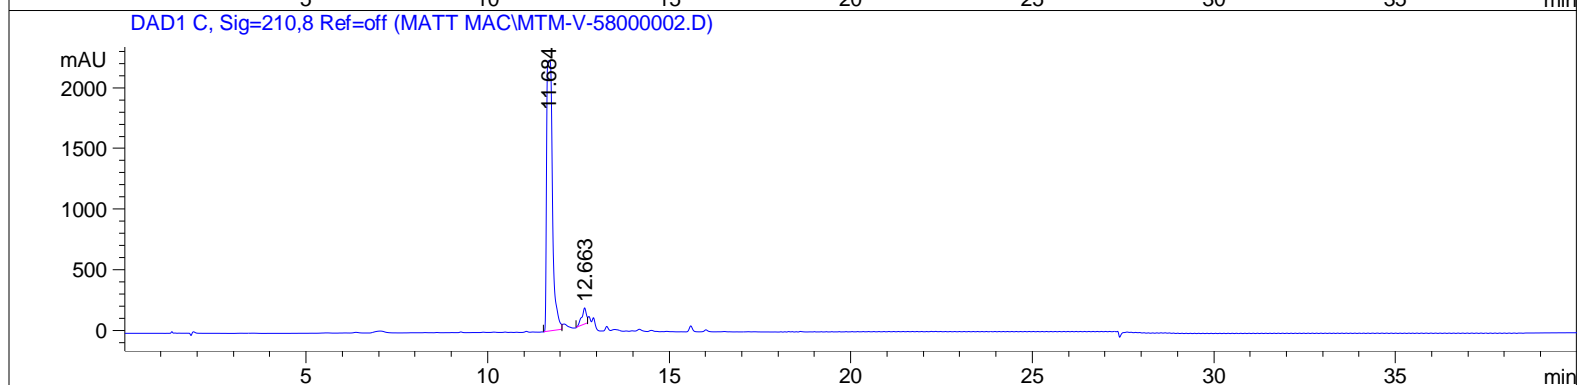

### HPLC traces of compound 35

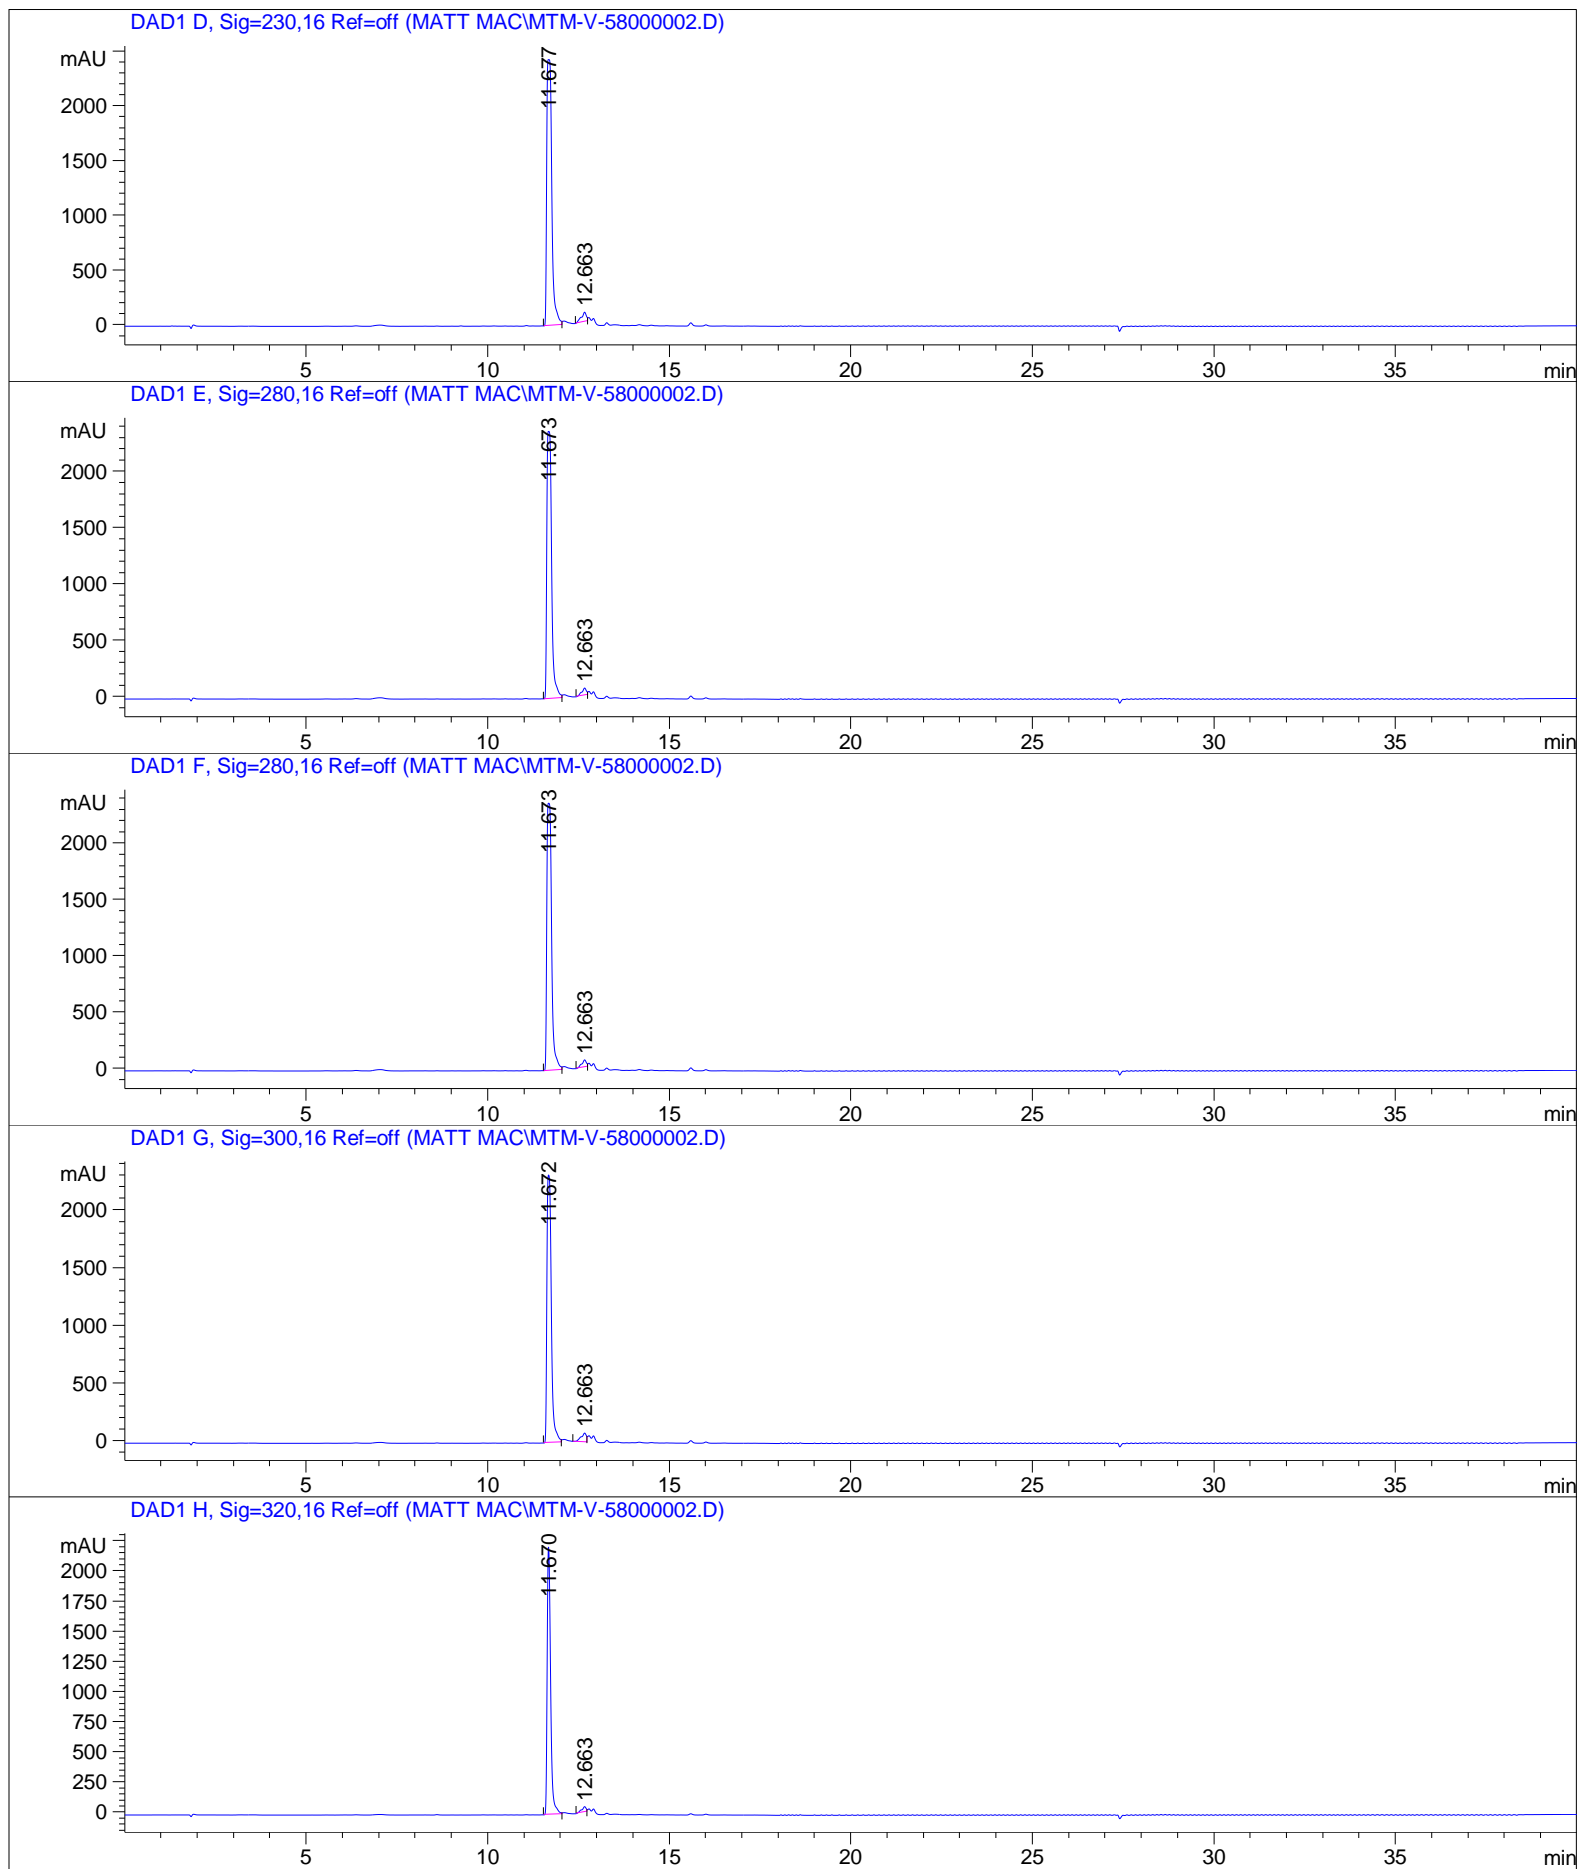

Sample Name: run1

## HPLC traces of compound 35

=====  
Area Percent Report  
=====

Sorted By : Signal  
Multiplier : 1.0000  
Dilution : 1.0000  
Use Multiplier & Dilution Factor with ISTDs

Signal 1: DAD1 A, Sig=254,4 Ref=off

| Peak # | RetTime [min] | Type | Width [min] | Area [mAU*s] | Height [mAU] | Area %  |
|--------|---------------|------|-------------|--------------|--------------|---------|
| 1      | 11.670        | BV   | 0.1366      | 2.06994e4    | 2400.60474   | 96.8656 |
| 2      | 12.663        | BV   | 0.1233      | 669.79010    | 77.10614     | 3.1344  |

Totals : 2.13692e4 2477.71088

Signal 2: DAD1 B, Sig=254,16 Ref=off

| Peak # | RetTime [min] | Type | Width [min] | Area [mAU*s] | Height [mAU] | Area %  |
|--------|---------------|------|-------------|--------------|--------------|---------|
| 1      | 11.672        | BV   | 0.1390      | 2.09971e4    | 2425.36963   | 96.9310 |
| 2      | 12.663        | BV   | 0.1241      | 664.80243    | 75.93778     | 3.0690  |

Totals : 2.16619e4 2501.30741

Signal 3: DAD1 C, Sig=210,8 Ref=off

| Peak # | RetTime [min] | Type | Width [min] | Area [mAU*s] | Height [mAU] | Area %  |
|--------|---------------|------|-------------|--------------|--------------|---------|
| 1      | 11.684        | BV   | 0.1768      | 2.49809e4    | 2228.70850   | 95.3229 |
| 2      | 12.663        | BV   | 0.1273      | 1225.71509   | 135.74158    | 4.6771  |

Totals : 2.62066e4 2364.45007

Signal 4: DAD1 D, Sig=230,16 Ref=off

| Peak # | RetTime [min] | Type | Width [min] | Area [mAU*s] | Height [mAU] | Area %  |
|--------|---------------|------|-------------|--------------|--------------|---------|
| 1      | 11.677        | BV   | 0.1549      | 2.35212e4    | 2429.63184   | 96.4298 |
| 2      | 12.663        | BV   | 0.1388      | 870.83435    | 86.97546     | 3.5702  |

Sample Name: run1

## HPLC traces of compound 35

| Peak #   | RetTime [min] | Type | Width [min] | Area [mAU*s] | Height [mAU] | Area % |
|----------|---------------|------|-------------|--------------|--------------|--------|
| Totals : |               |      |             | 2.43920e4    | 2516.60730   |        |

Signal 5: DAD1 E, Sig=280,16 Ref=off

| Peak #   | RetTime [min] | Type | Width [min] | Area [mAU*s] | Height [mAU] | Area %  |
|----------|---------------|------|-------------|--------------|--------------|---------|
| 1        | 11.673        | BV   | 0.1442      | 2.16120e4    | 2373.22510   | 97.4647 |
| 2        | 12.663        | BV   | 0.1249      | 562.18378    | 63.75766     | 2.5353  |
| Totals : |               |      |             | 2.21741e4    | 2436.98276   |         |

Signal 6: DAD1 F, Sig=280,16 Ref=off

| Peak #   | RetTime [min] | Type | Width [min] | Area [mAU*s] | Height [mAU] | Area %  |
|----------|---------------|------|-------------|--------------|--------------|---------|
| 1        | 11.673        | BV   | 0.1442      | 2.16120e4    | 2373.22510   | 97.4647 |
| 2        | 12.663        | BV   | 0.1249      | 562.18378    | 63.75766     | 2.5353  |
| Totals : |               |      |             | 2.21741e4    | 2436.98276   |         |

Signal 7: DAD1 G, Sig=300,16 Ref=off

| Peak #   | RetTime [min] | Type | Width [min] | Area [mAU*s] | Height [mAU] | Area %  |
|----------|---------------|------|-------------|--------------|--------------|---------|
| 1        | 11.672        | BV   | 0.1341      | 1.95065e4    | 2319.21680   | 96.0807 |
| 2        | 12.663        | BV   | 0.1414      | 795.70215    | 76.45817     | 3.9193  |
| Totals : |               |      |             | 2.03022e4    | 2395.67496   |         |

Signal 8: DAD1 H, Sig=320,16 Ref=off

| Peak #   | RetTime [min] | Type | Width [min] | Area [mAU*s] | Height [mAU] | Area %  |
|----------|---------------|------|-------------|--------------|--------------|---------|
| 1        | 11.670        | BV   | 0.1026      | 1.46092e4    | 2224.54712   | 97.2378 |
| 2        | 12.663        | BV   | 0.1257      | 415.00085    | 45.78540     | 2.7622  |
| Totals : |               |      |             | 1.50242e4    | 2270.33252   |         |

Sample Name: run1

HPLC traces of compound **35**

=====  
\*\*\* End of Report \*\*\*

# HRMS of compound 35

C:\Xcalibur\...Matt2-10-2013\MTM-V-58

2/10/2013 4:22:35 PM

MTM-V-58

MTM-V-58 #10 RT: 0.08 AV: 1 NL: 1.22E8

T: FTMS + p ESI Full ms [200.00-2000.00]

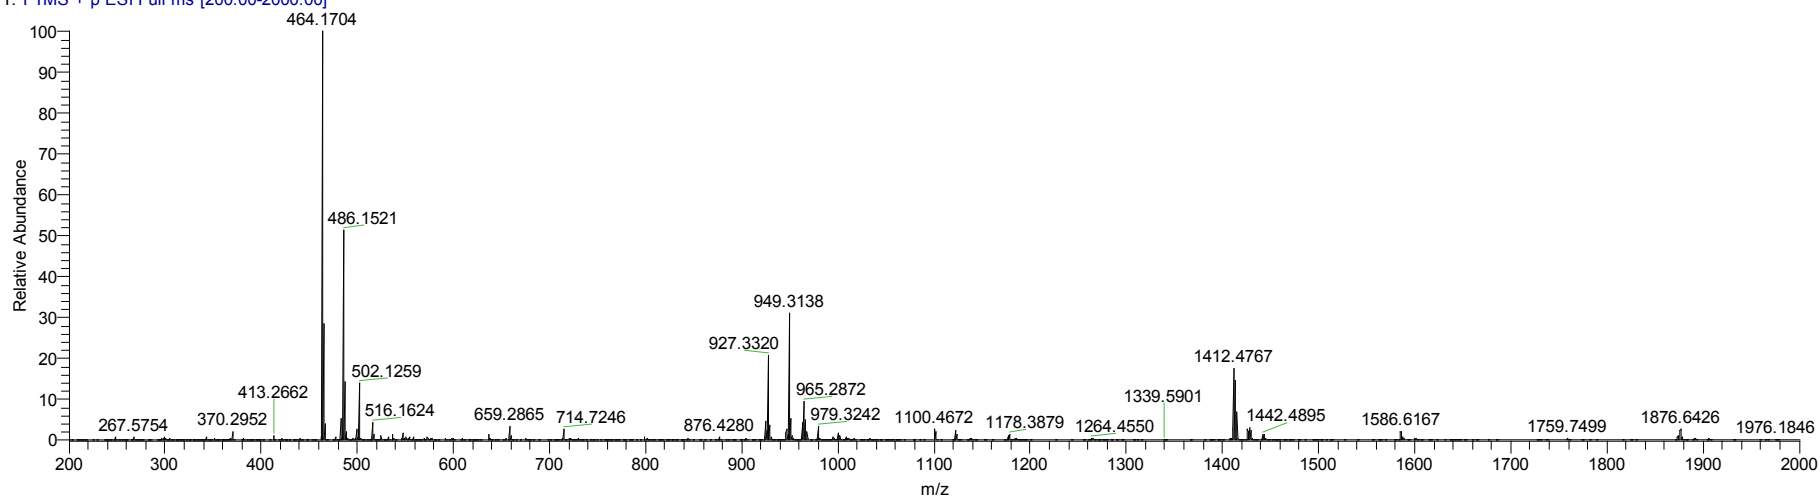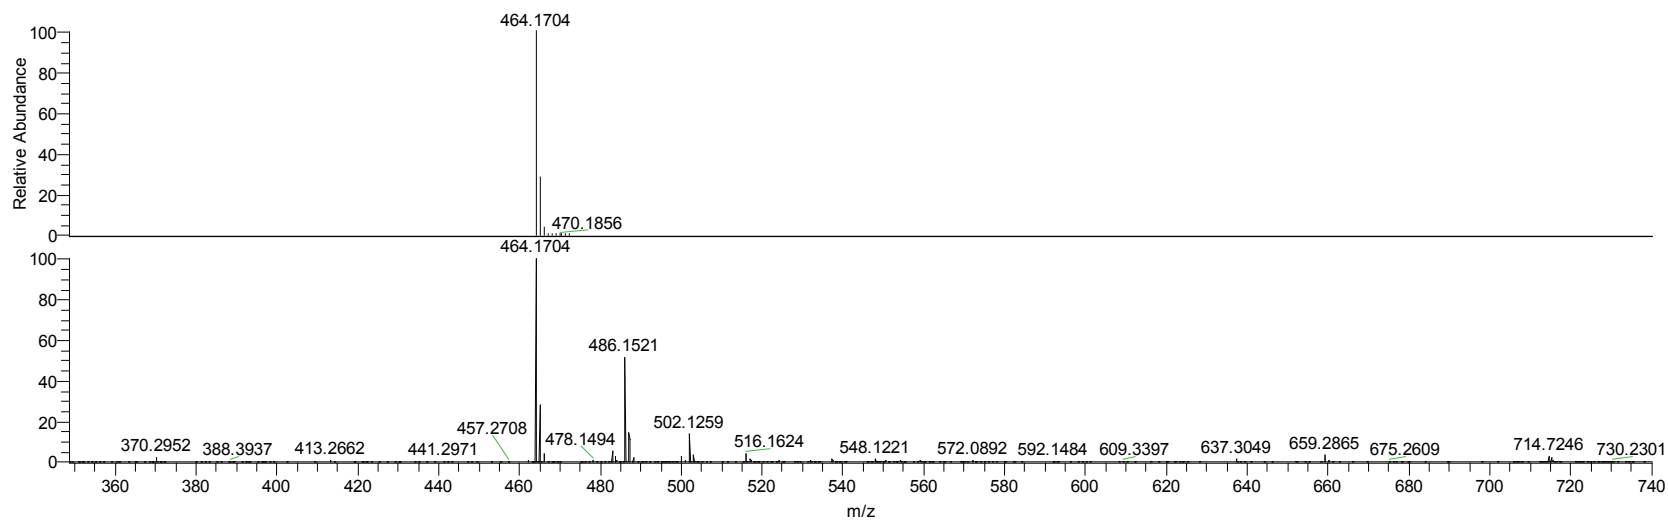

NL:  
7.38E5  
C<sub>26</sub>H<sub>26</sub>O<sub>7</sub>N:  
C<sub>26</sub>H<sub>26</sub>O<sub>7</sub>N<sub>1</sub>  
pa Chrg 1

NL:  
1.22E8  
MTM-V-58#10  
RT: 0.08 AV: 1 T:  
FTMS + p ESI Full  
ms  
[200.00-2000.00]

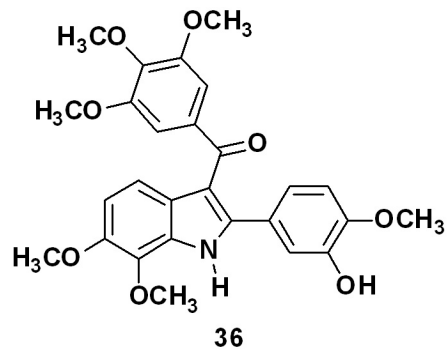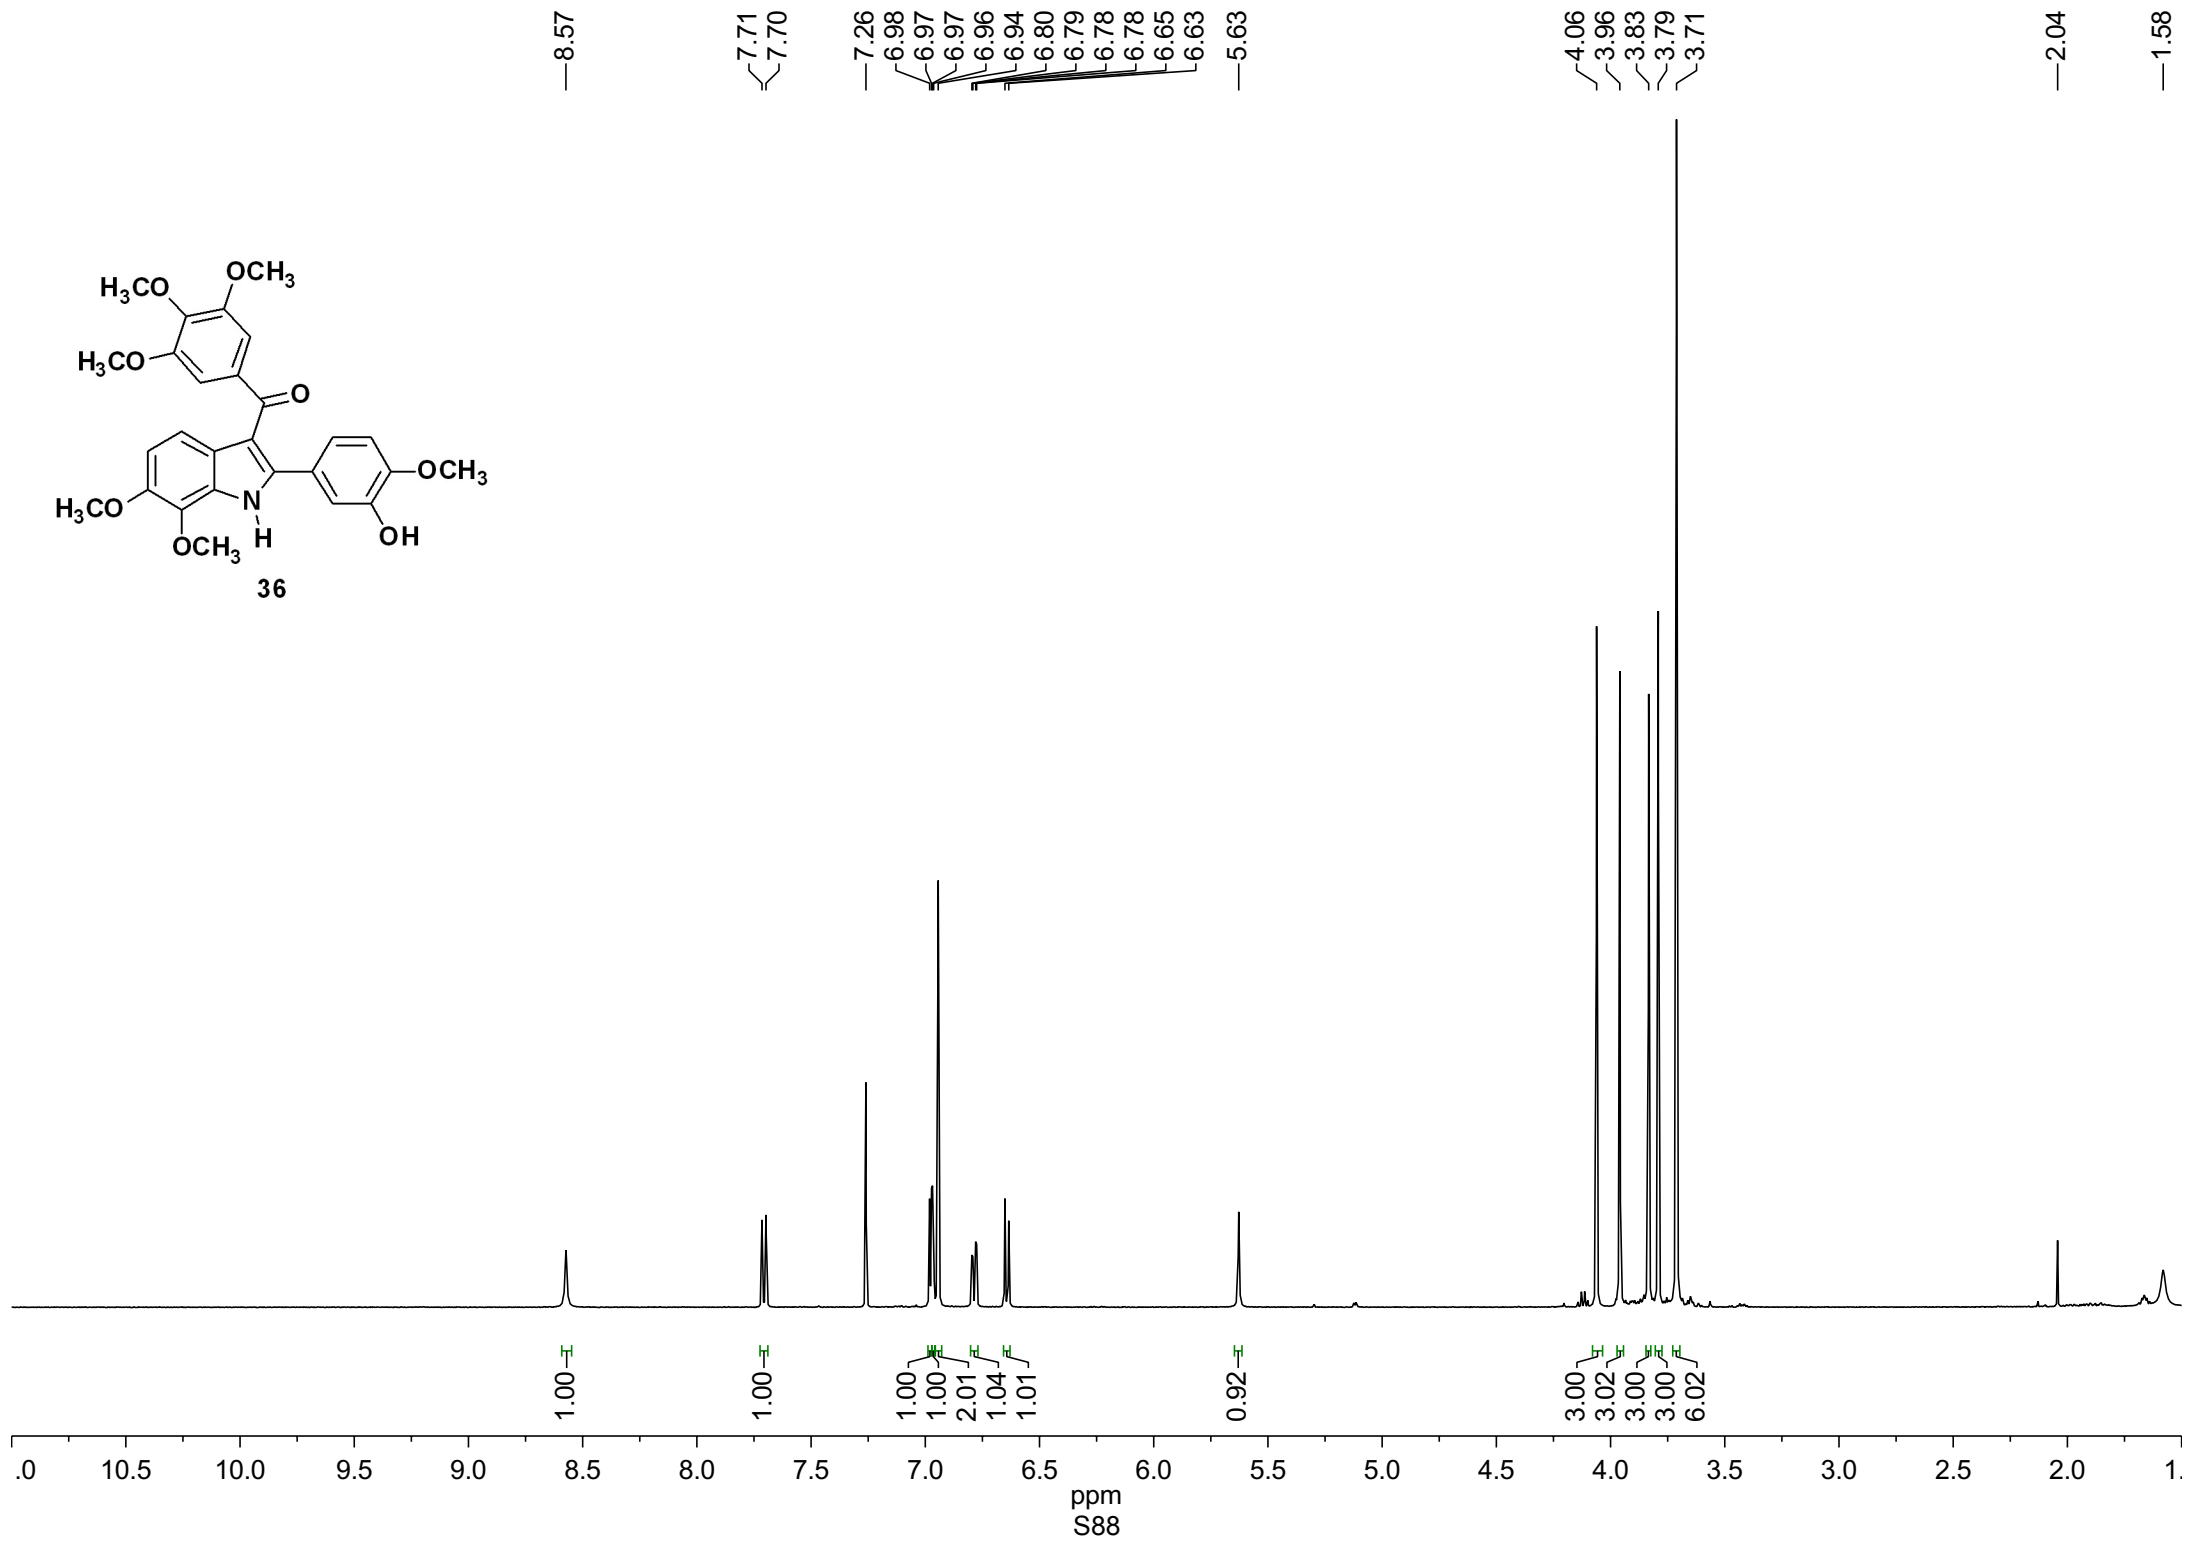



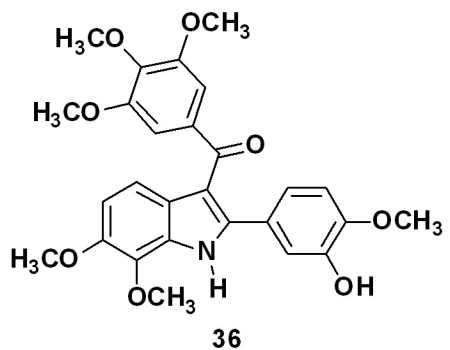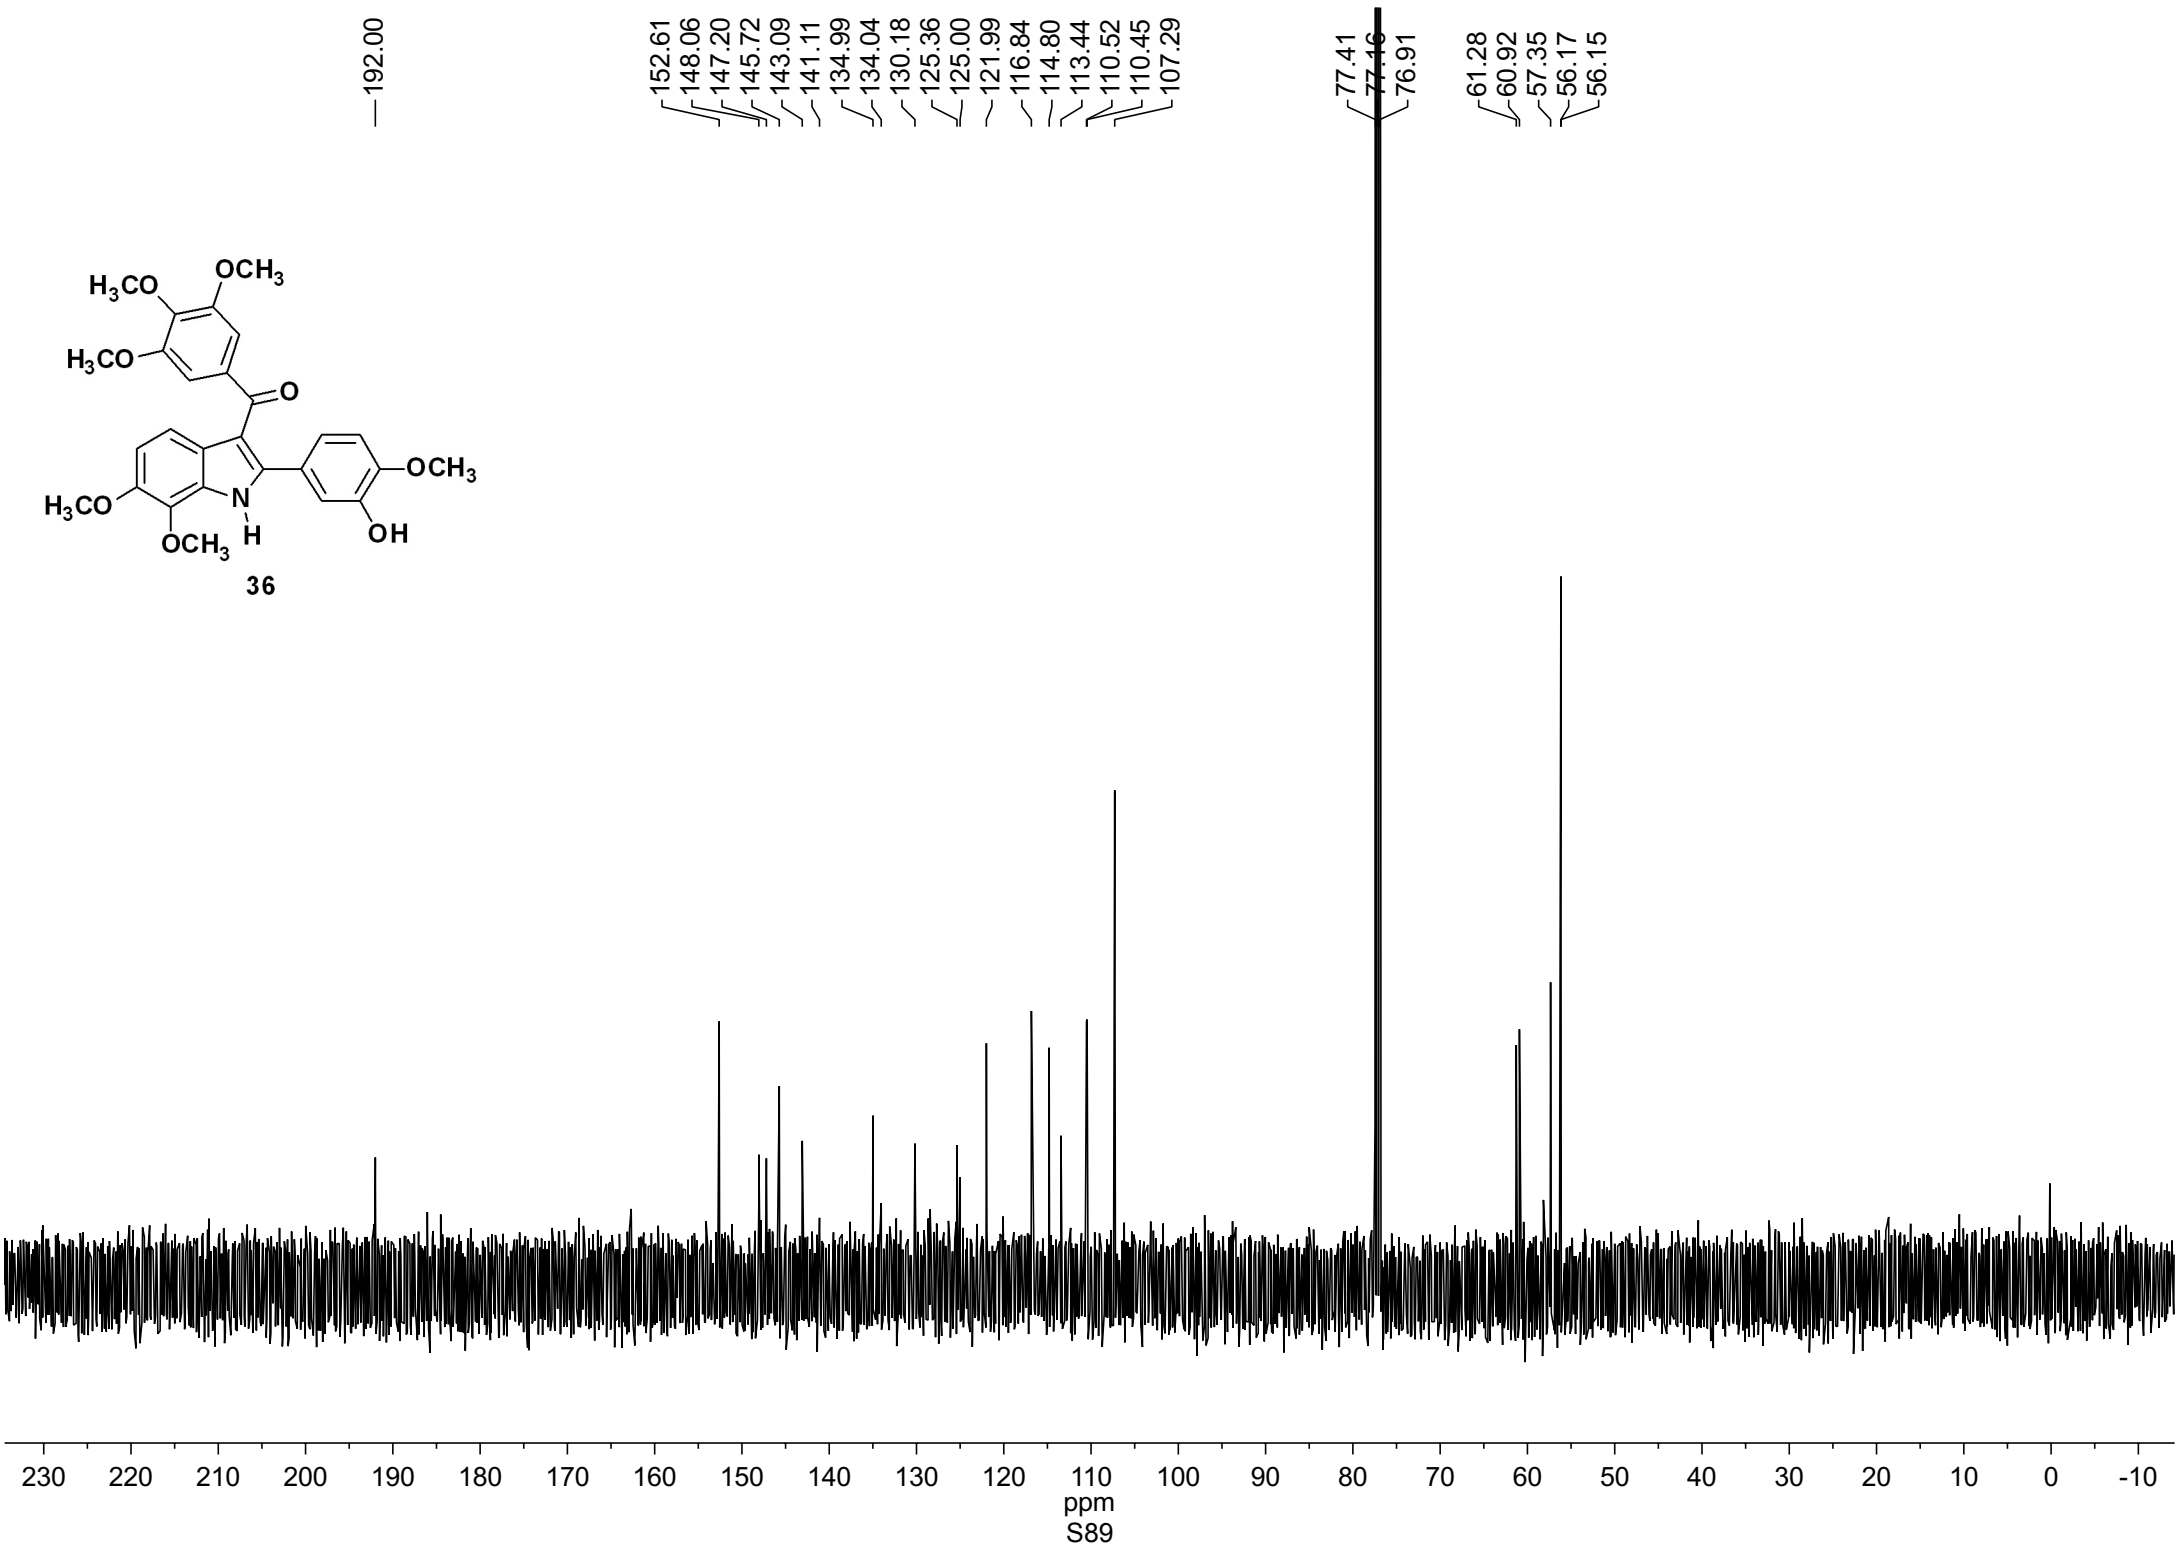

Sample Name: run1

HPLC traces of compound **36**

=====  
Acq. Operator : Matt Mac  
Acq. Instrument : Instrument 1 Location : -  
Injection Date : 3/4/2013 1:27:41 PM  
Acq. Method : C:\CHEM32\1\METHODS\MASTERMETHOD.M  
Last changed : 3/4/2013 12:54:38 PM by Matt Mac  
Analysis Method : C:\CHEM32\1\DATA\MATT MAC\MTM-V-63000003.D\DA.M (MASTERMETHOD.M)  
Last changed : 3/4/2013 2:17:56 PM by Matt Mac

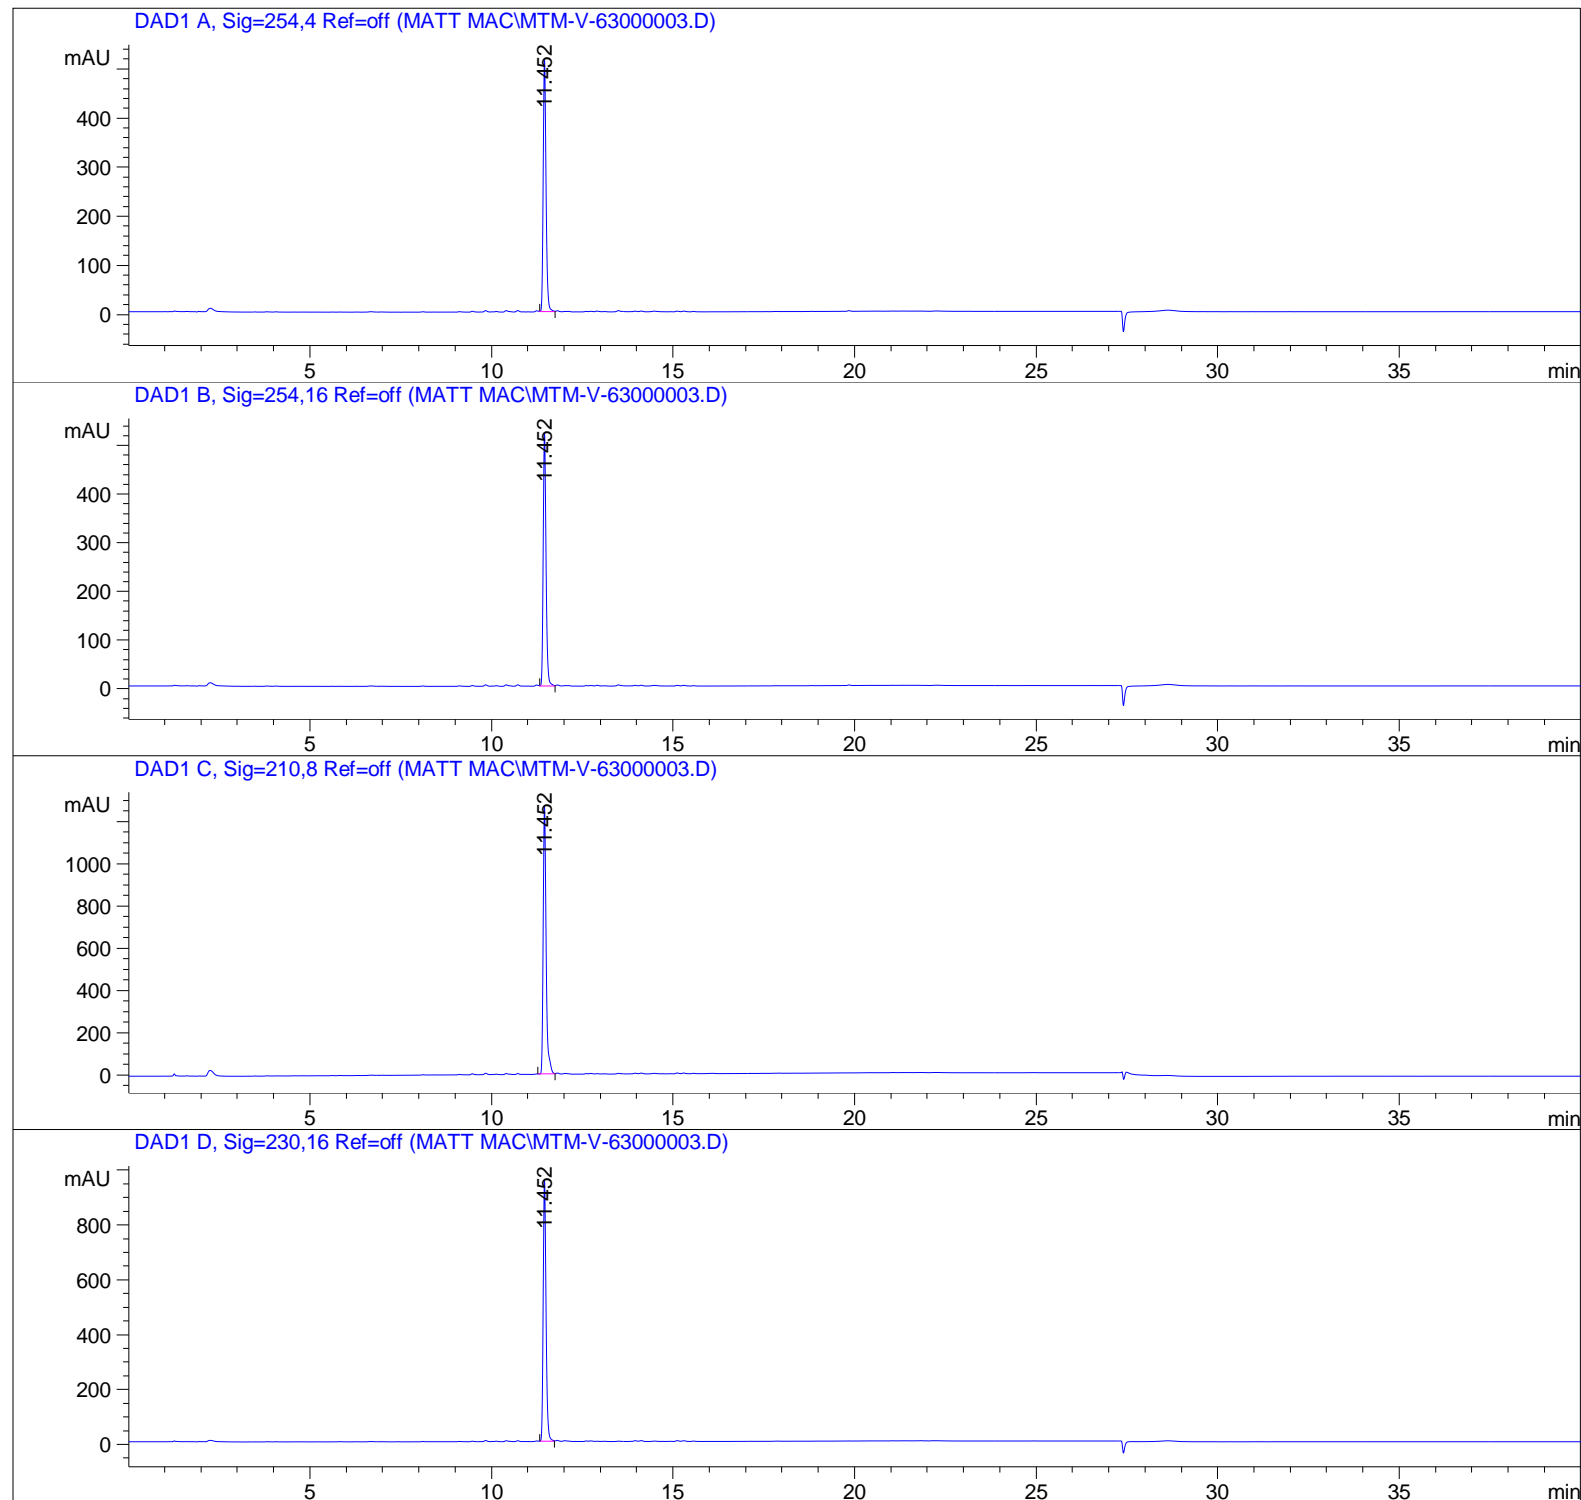

## HPLC traces of compound 36

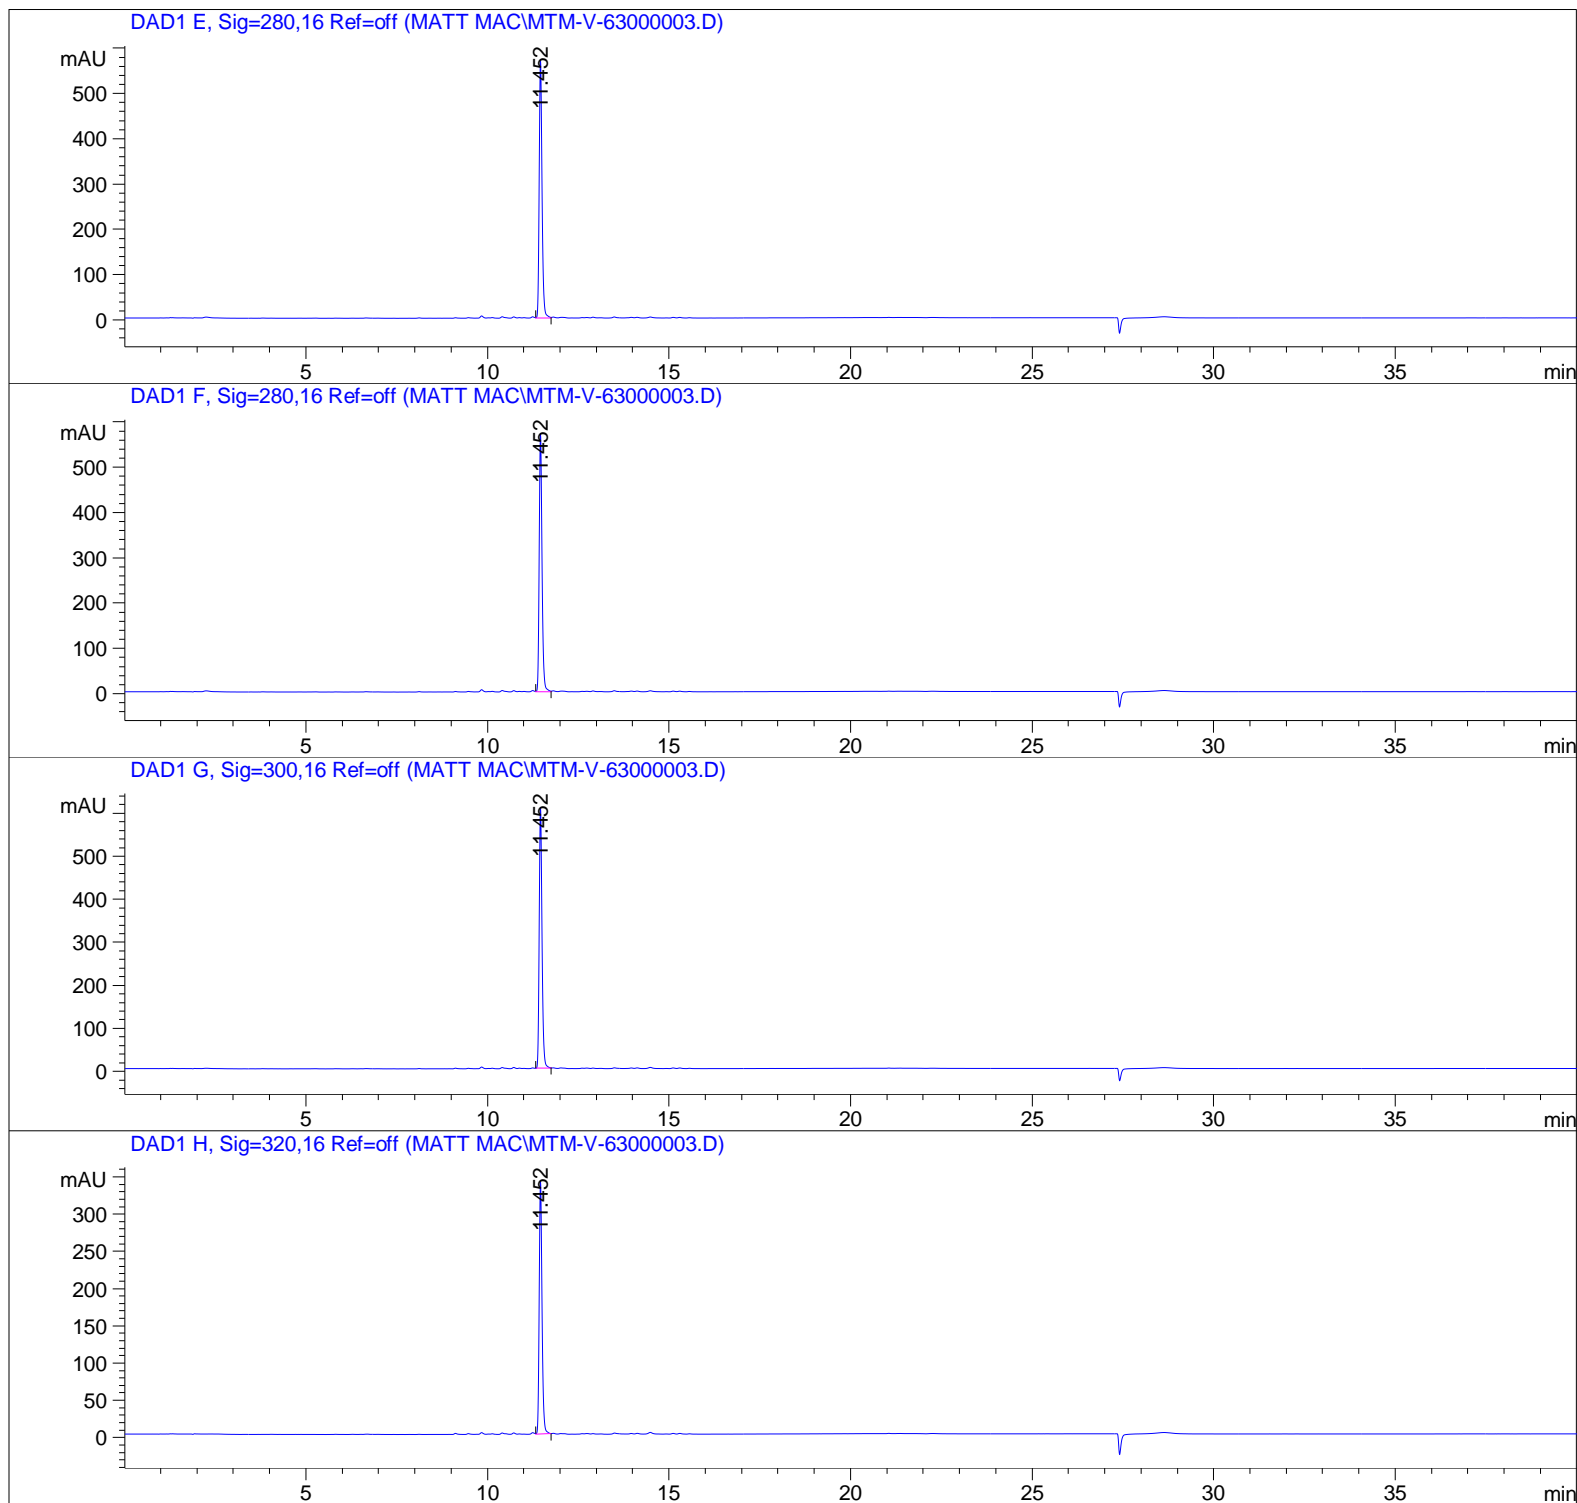=====  
Area Percent Report  
=====

Sorted By : Signal  
Multiplier : 1.0000  
Dilution : 1.0000  
Use Multiplier & Dilution Factor with ISTDs

Sample Name: run1

## HPLC traces of compound 36

Signal 1: DAD1 A, Sig=254,4 Ref=off

| Peak # | RetTime [min] | Type | Width [min] | Area [mAU*s] | Height [mAU] | Area %   |
|--------|---------------|------|-------------|--------------|--------------|----------|
| 1      | 11.452        | VV   | 0.0809      | 2782.00977   | 516.37561    | 100.0000 |

Totals : 2782.00977 516.37561

Signal 2: DAD1 B, Sig=254,16 Ref=off

| Peak # | RetTime [min] | Type | Width [min] | Area [mAU*s] | Height [mAU] | Area %   |
|--------|---------------|------|-------------|--------------|--------------|----------|
| 1      | 11.452        | VV   | 0.0809      | 2812.19629   | 521.91907    | 100.0000 |

Totals : 2812.19629 521.91907

Signal 3: DAD1 C, Sig=210,8 Ref=off

| Peak # | RetTime [min] | Type | Width [min] | Area [mAU*s] | Height [mAU] | Area %   |
|--------|---------------|------|-------------|--------------|--------------|----------|
| 1      | 11.452        | BV   | 0.0858      | 7160.16650   | 1269.44250   | 100.0000 |

Totals : 7160.16650 1269.44250

Signal 4: DAD1 D, Sig=230,16 Ref=off

| Peak # | RetTime [min] | Type | Width [min] | Area [mAU*s] | Height [mAU] | Area %   |
|--------|---------------|------|-------------|--------------|--------------|----------|
| 1      | 11.452        | VV   | 0.0813      | 5182.18311   | 954.98956    | 100.0000 |

Totals : 5182.18311 954.98956

Signal 5: DAD1 E, Sig=280,16 Ref=off

| Peak # | RetTime [min] | Type | Width [min] | Area [mAU*s] | Height [mAU] | Area %   |
|--------|---------------|------|-------------|--------------|--------------|----------|
| 1      | 11.452        | VV   | 0.0809      | 3076.47729   | 570.49207    | 100.0000 |

Totals : 3076.47729 570.49207

Sample Name: run1

## HPLC traces of compound 36

Signal 6: DAD1 F, Sig=280,16 Ref=off

| Peak # | RetTime [min] | Type | Width [min] | Area [mAU*s] | Height [mAU] | Area %   |
|--------|---------------|------|-------------|--------------|--------------|----------|
| 1      | 11.452        | VV   | 0.0809      | 3076.47729   | 570.49207    | 100.0000 |

Totals : 3076.47729 570.49207

Signal 7: DAD1 G, Sig=300,16 Ref=off

| Peak # | RetTime [min] | Type | Width [min] | Area [mAU*s] | Height [mAU] | Area %   |
|--------|---------------|------|-------------|--------------|--------------|----------|
| 1      | 11.452        | VV   | 0.0809      | 3278.34961   | 607.59808    | 100.0000 |

Totals : 3278.34961 607.59808

Signal 8: DAD1 H, Sig=320,16 Ref=off

| Peak # | RetTime [min] | Type | Width [min] | Area [mAU*s] | Height [mAU] | Area %   |
|--------|---------------|------|-------------|--------------|--------------|----------|
| 1      | 11.452        | VV   | 0.0808      | 1831.79126   | 340.07983    | 100.0000 |

Totals : 1831.79126 340.07983

=====  
\*\*\* End of Report \*\*\*

# HRMS of compound 36

C:\Xcalibur\...MTM-V-63\_130310125003

3/10/2013 2:06:26 PM

MTM-V-63

MTM-V-63\_130310125003 #13 RT: 0.10 AV: 1 NL: 8.21E7  
T: FTMS + p ESI Full ms [50.00-1000.00]

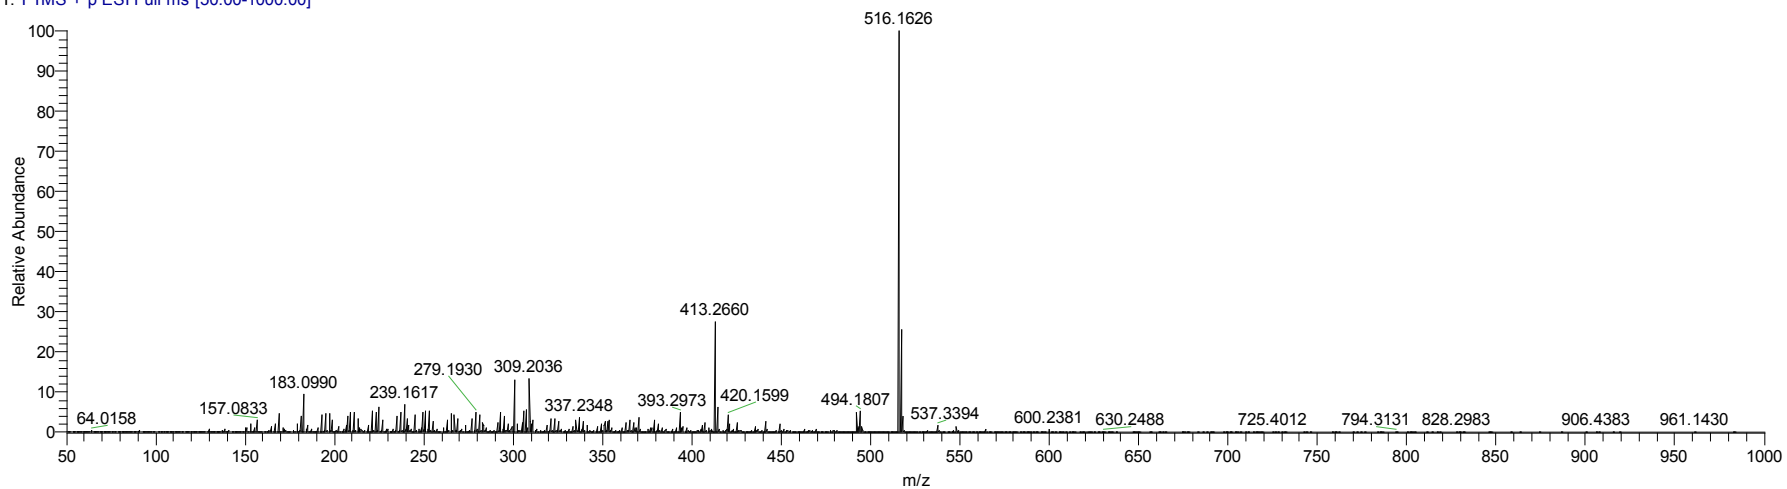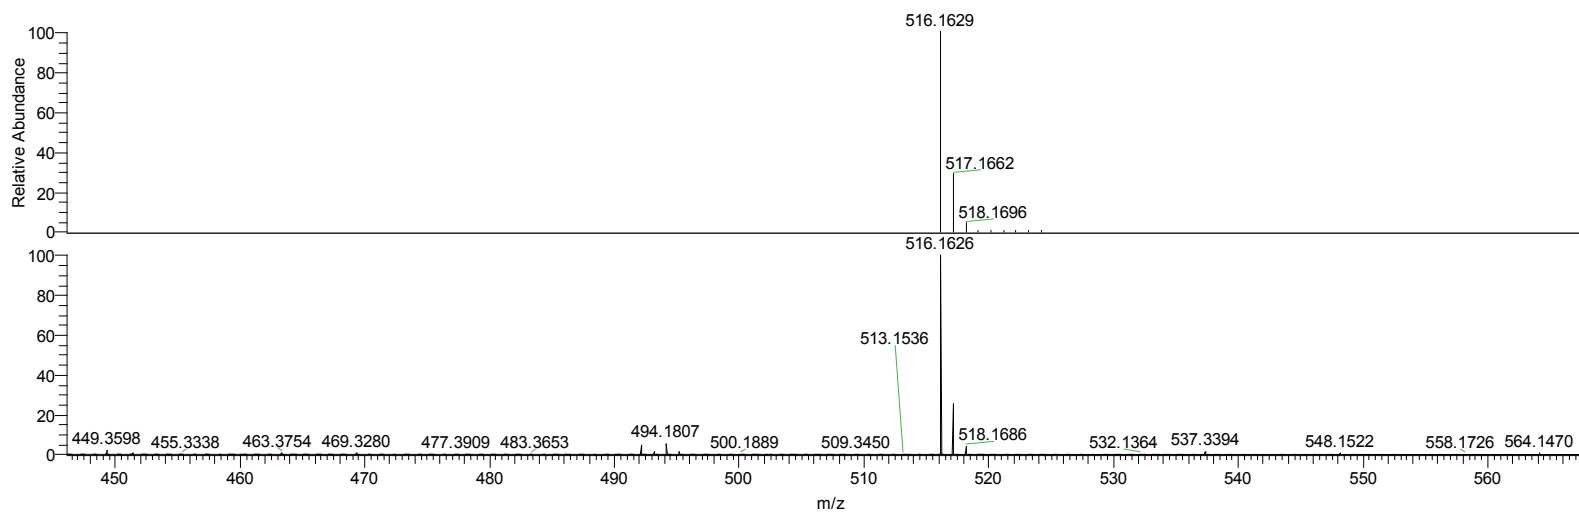

NL:  
7.29E5  
C<sub>27</sub>H<sub>27</sub>O<sub>8</sub>N Na:  
C<sub>27</sub>H<sub>27</sub>O<sub>8</sub>N<sub>1</sub>Na<sub>1</sub>  
pa Chrg 1

NL:  
8.21E7  
MTM-V-  
63\_130310125003#13  
RT: 0.10 AV: 1 T:  
FTMS + p ESI Full  
ms [50.00-1000.00]

### X-ray Crystallographic Analysis:

X-ray crystallographic analysis of compound **10**.<sup>S1</sup> Crystallographic data were collected on a crystal of **10** with dimensions 0.27 x 0.15 x 0.13 mm<sup>3</sup>. Data were collected at 110 K on a Bruker X8 Apex using Mo KR radiation ( $\lambda = 0.71073 \text{ \AA}$ ). The structure was solved by direct methods after correction of the data using SADABS. Crystallographic data and refinement details for the complex mentioned herein is found in the Supporting Information (Table S1-S4). The thermal ellipsoid plots at 50% probability for compound **10** is displayed in Figure S1. All data were processed using the Bruker AXS SHELXTL software, version 6.10.

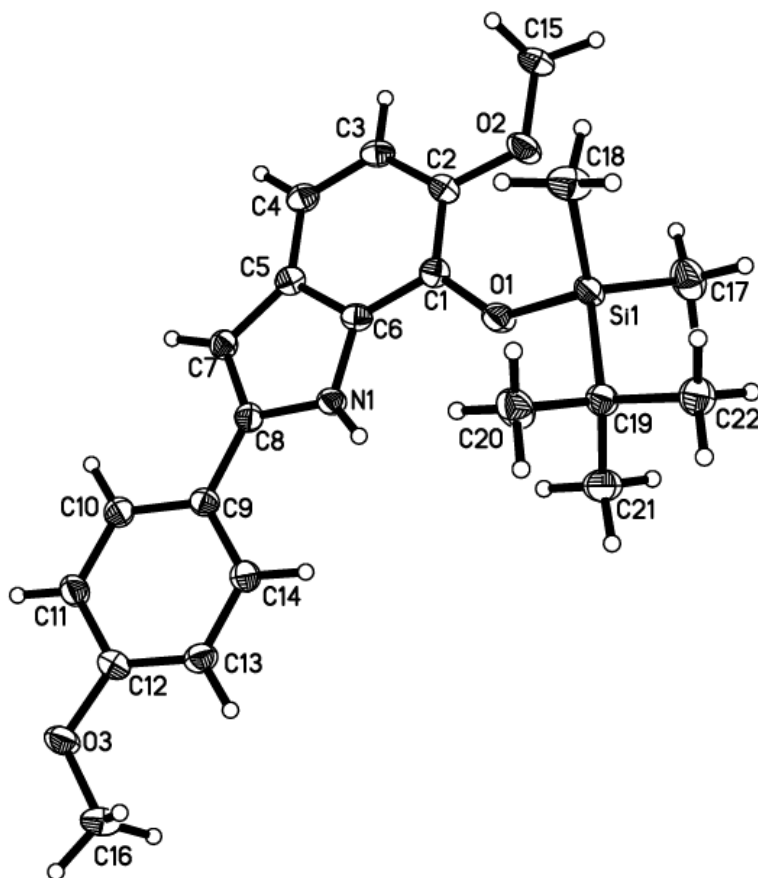

Figure S1. X-ray crystallography of compound **10**.

Table S1. Crystal data and structure refinement for 10.

|                                   |                                                                                                                            |
|-----------------------------------|----------------------------------------------------------------------------------------------------------------------------|
| Identification code               | kp50                                                                                                                       |
| Empirical formula                 | C <sub>22</sub> H <sub>29</sub> N O <sub>3</sub> Si                                                                        |
| Formula weight                    | 383.55                                                                                                                     |
| Temperature                       | 110(2) K                                                                                                                   |
| Wavelength                        | 0.71073 Å                                                                                                                  |
| Crystal system                    | Triclinic                                                                                                                  |
| Space group                       | P-1                                                                                                                        |
| Unit cell dimensions              | a = 7.3314(5) Å $\alpha$ = 97.114(2)°.<br>b = 9.6558(5) Å $\beta$ = 94.927(2)°.<br>c = 15.1609(9) Å $\gamma$ = 99.888(2)°. |
| Volume                            | 1042.84(11) Å <sup>3</sup>                                                                                                 |
| Z                                 | 2                                                                                                                          |
| Density (calculated)              | 1.221 Mg/m <sup>3</sup>                                                                                                    |
| Absorption coefficient            | 0.134 mm <sup>-1</sup>                                                                                                     |
| F(000)                            | 412                                                                                                                        |
| Crystal size                      | 0.27 x 0.15 x 0.13 mm <sup>3</sup>                                                                                         |
| Theta range for data collection   | 1.36 to 26.37°.                                                                                                            |
| Index ranges                      | -9<=h<=9, -8<=k<=12, -18<=l<=18                                                                                            |
| Reflections collected             | 17172                                                                                                                      |
| Independent reflections           | 4231 [R(int) = 0.0490]                                                                                                     |
| Completeness to theta = 26.37°    | 99.2 %                                                                                                                     |
| Absorption correction             | Semi-empirical from equivalents                                                                                            |
| Max. and min. transmission        | 0.9823 and 0.9647                                                                                                          |
| Refinement method                 | Full-matrix least-squares on F <sup>2</sup>                                                                                |
| Data / restraints / parameters    | 4231 / 0 / 255                                                                                                             |
| Goodness-of-fit on F <sup>2</sup> | 1.037                                                                                                                      |
| Final R indices [I>2sigma(I)]     | R1 = 0.0427, wR2 = 0.1042                                                                                                  |
| R indices (all data)              | R1 = 0.0564, wR2 = 0.1142                                                                                                  |
| Largest diff. peak and hole       | 0.340 and -0.313 e.Å <sup>-3</sup>                                                                                         |



Table S2. Atomic coordinates ( $\times 10^4$ ) and equivalent isotropic displacement parameters ( $\text{\AA}^2 \times 10^3$ ) for **10**.  $U(\text{eq})$  is defined as one third of the trace of the orthogonalized  $U^{ij}$  tensor.

|       | x       | y        | z       | $U(\text{eq})$ |
|-------|---------|----------|---------|----------------|
| Si(1) | 4713(1) | 9097(1)  | 1851(1) | 21(1)          |
| O(1)  | 4220(2) | 7418(1)  | 2037(1) | 26(1)          |
| O(2)  | 3856(2) | 6872(1)  | 191(1)  | 28(1)          |
| O(3)  | 768(2)  | 2922(1)  | 6726(1) | 28(1)          |
| N(1)  | 2658(2) | 5171(2)  | 2980(1) | 20(1)          |
| C(1)  | 3300(2) | 6151(2)  | 1571(1) | 20(1)          |
| C(2)  | 3079(2) | 5808(2)  | 644(1)  | 21(1)          |
| C(3)  | 2156(2) | 4453(2)  | 238(1)  | 23(1)          |
| C(4)  | 1451(2) | 3422(2)  | 740(1)  | 23(1)          |
| C(5)  | 1660(2) | 3736(2)  | 1675(1) | 20(1)          |
| C(6)  | 2594(2) | 5099(2)  | 2067(1) | 19(1)          |
| C(7)  | 1117(2) | 2997(2)  | 2405(1) | 20(1)          |
| C(8)  | 1734(2) | 3898(2)  | 3191(1) | 20(1)          |
| C(9)  | 1561(2) | 3677(2)  | 4120(1) | 19(1)          |
| C(10) | 443(2)  | 2452(2)  | 4313(1) | 23(1)          |
| C(11) | 226(2)  | 2227(2)  | 5182(1) | 25(1)          |
| C(12) | 1118(2) | 3234(2)  | 5895(1) | 22(1)          |
| C(13) | 2259(2) | 4445(2)  | 5724(1) | 25(1)          |
| C(14) | 2468(2) | 4661(2)  | 4844(1) | 24(1)          |
| C(15) | 3613(3) | 6623(2)  | -762(1) | 27(1)          |
| C(16) | 1662(3) | 3927(2)  | 7474(1) | 29(1)          |
| C(17) | 6965(3) | 9383(2)  | 1362(1) | 34(1)          |
| C(18) | 2779(3) | 9591(2)  | 1155(1) | 33(1)          |
| C(19) | 4968(2) | 10083(2) | 3024(1) | 23(1)          |
| C(20) | 3072(3) | 9877(2)  | 3394(1) | 31(1)          |
| C(21) | 6344(3) | 9509(2)  | 3636(1) | 32(1)          |
| C(22) | 5653(3) | 11685(2) | 3021(1) | 28(1)          |

Table S3. Bond lengths [ $\text{\AA}$ ] and angles [ $^\circ$ ] for **10**.

---

|                   |            |
|-------------------|------------|
| Si(1)-O(1)        | 1.6635(12) |
| Si(1)-C(18)       | 1.8580(19) |
| Si(1)-C(17)       | 1.860(2)   |
| Si(1)-C(19)       | 1.8879(18) |
| O(1)-C(1)         | 1.367(2)   |
| O(2)-C(2)         | 1.375(2)   |
| O(2)-C(15)        | 1.426(2)   |
| O(3)-C(12)        | 1.367(2)   |
| O(3)-C(16)        | 1.428(2)   |
| N(1)-C(6)         | 1.374(2)   |
| N(1)-C(8)         | 1.386(2)   |
| C(1)-C(2)         | 1.393(2)   |
| C(1)-C(6)         | 1.393(2)   |
| C(2)-C(3)         | 1.404(2)   |
| C(3)-C(4)         | 1.384(2)   |
| C(4)-C(5)         | 1.403(2)   |
| C(5)-C(6)         | 1.407(2)   |
| C(5)-C(7)         | 1.437(2)   |
| C(7)-C(8)         | 1.377(2)   |
| C(8)-C(9)         | 1.464(2)   |
| C(9)-C(14)        | 1.396(2)   |
| C(9)-C(10)        | 1.396(2)   |
| C(10)-C(11)       | 1.379(2)   |
| C(11)-C(12)       | 1.394(2)   |
| C(12)-C(13)       | 1.382(2)   |
| C(13)-C(14)       | 1.392(2)   |
| C(19)-C(21)       | 1.532(2)   |
| C(19)-C(20)       | 1.534(2)   |
| C(19)-C(22)       | 1.543(2)   |
| O(1)-Si(1)-C(18)  | 111.85(8)  |
| O(1)-Si(1)-C(17)  | 108.82(8)  |
| C(18)-Si(1)-C(17) | 113.09(9)  |
| O(1)-Si(1)-C(19)  | 101.50(7)  |

|                   |            |
|-------------------|------------|
| C(18)-Si(1)-C(19) | 110.31(8)  |
| C(17)-Si(1)-C(19) | 110.67(9)  |
| C(1)-O(1)-Si(1)   | 136.84(11) |
| C(2)-O(2)-C(15)   | 118.03(14) |
| C(12)-O(3)-C(16)  | 117.14(14) |
| C(6)-N(1)-C(8)    | 109.35(14) |
| O(1)-C(1)-C(2)    | 125.36(15) |
| O(1)-C(1)-C(6)    | 117.24(15) |
| C(2)-C(1)-C(6)    | 117.35(15) |
| O(2)-C(2)-C(1)    | 114.75(15) |
| O(2)-C(2)-C(3)    | 124.85(15) |
| C(1)-C(2)-C(3)    | 120.38(16) |
| C(4)-C(3)-C(2)    | 121.61(16) |
| C(3)-C(4)-C(5)    | 119.27(16) |
| C(4)-C(5)-C(6)    | 118.14(16) |
| C(4)-C(5)-C(7)    | 135.97(16) |
| C(6)-C(5)-C(7)    | 105.88(14) |
| N(1)-C(6)-C(1)    | 128.28(15) |
| N(1)-C(6)-C(5)    | 108.47(15) |
| C(1)-C(6)-C(5)    | 123.25(15) |
| C(8)-C(7)-C(5)    | 108.16(15) |
| C(7)-C(8)-N(1)    | 108.11(14) |
| C(7)-C(8)-C(9)    | 130.51(15) |
| N(1)-C(8)-C(9)    | 121.37(15) |
| C(14)-C(9)-C(10)  | 117.27(16) |
| C(14)-C(9)-C(8)   | 122.51(15) |
| C(10)-C(9)-C(8)   | 120.22(15) |
| C(11)-C(10)-C(9)  | 121.54(16) |
| C(10)-C(11)-C(12) | 120.31(16) |
| O(3)-C(12)-C(13)  | 125.15(16) |
| O(3)-C(12)-C(11)  | 115.49(15) |
| C(13)-C(12)-C(11) | 119.35(16) |
| C(12)-C(13)-C(14) | 119.81(16) |
| C(13)-C(14)-C(9)  | 121.69(16) |
| C(21)-C(19)-C(20) | 108.49(15) |
| C(21)-C(19)-C(22) | 109.60(15) |

|                   |            |
|-------------------|------------|
| C(20)-C(19)-C(22) | 108.58(14) |
| C(21)-C(19)-Si(1) | 110.38(12) |
| C(20)-C(19)-Si(1) | 109.42(12) |
| C(22)-C(19)-Si(1) | 110.33(12) |

---

Symmetry transformations used to generate equivalent atoms:

Table S4. Anisotropic displacement parameters ( $\text{\AA}^2 \times 10^3$ ) for **10**. The anisotropic displacement factor exponent takes the form:  $-2p^2[ h^2 a^2 U^{11} + \dots + 2 h k a^* b^* U^{12} ]$

|       | U11   | U22   | U33   | U23   | U13   | U12   |
|-------|-------|-------|-------|-------|-------|-------|
| Si(1) | 27(1) | 19(1) | 17(1) | 4(1)  | 5(1)  | 3(1)  |
| O(1)  | 41(1) | 18(1) | 16(1) | 1(1)  | 1(1)  | -1(1) |
| O(2)  | 43(1) | 25(1) | 16(1) | 4(1)  | 6(1)  | 1(1)  |
| O(3)  | 38(1) | 27(1) | 16(1) | 2(1)  | 5(1)  | 2(1)  |
| N(1)  | 26(1) | 17(1) | 16(1) | 1(1)  | 1(1)  | 1(1)  |
| C(1)  | 22(1) | 18(1) | 20(1) | 1(1)  | 2(1)  | 4(1)  |
| C(2)  | 24(1) | 22(1) | 18(1) | 4(1)  | 4(1)  | 6(1)  |
| C(3)  | 26(1) | 26(1) | 16(1) | -1(1) | 0(1)  | 7(1)  |
| C(4)  | 25(1) | 23(1) | 20(1) | -2(1) | 0(1)  | 4(1)  |
| C(5)  | 21(1) | 20(1) | 20(1) | 1(1)  | 2(1)  | 5(1)  |
| C(6)  | 21(1) | 21(1) | 17(1) | 2(1)  | 2(1)  | 7(1)  |
| C(7)  | 22(1) | 18(1) | 21(1) | 2(1)  | 2(1)  | 2(1)  |
| C(8)  | 18(1) | 19(1) | 22(1) | 5(1)  | 2(1)  | 4(1)  |
| C(9)  | 20(1) | 20(1) | 20(1) | 4(1)  | 1(1)  | 5(1)  |
| C(10) | 26(1) | 21(1) | 21(1) | 0(1)  | 3(1)  | 0(1)  |
| C(11) | 29(1) | 22(1) | 22(1) | 4(1)  | 6(1)  | 0(1)  |
| C(12) | 25(1) | 24(1) | 19(1) | 5(1)  | 5(1)  | 8(1)  |
| C(13) | 28(1) | 24(1) | 20(1) | 0(1)  | -1(1) | 2(1)  |
| C(14) | 28(1) | 20(1) | 23(1) | 5(1)  | 0(1)  | 0(1)  |
| C(15) | 34(1) | 32(1) | 15(1) | 6(1)  | 4(1)  | 8(1)  |
| C(16) | 37(1) | 33(1) | 17(1) | 1(1)  | 1(1)  | 8(1)  |
| C(17) | 39(1) | 33(1) | 33(1) | 6(1)  | 15(1) | 4(1)  |
| C(18) | 42(1) | 33(1) | 23(1) | 3(1)  | 0(1)  | 11(1) |
| C(19) | 28(1) | 19(1) | 20(1) | 3(1)  | 2(1)  | 2(1)  |
| C(20) | 39(1) | 31(1) | 24(1) | 2(1)  | 12(1) | 4(1)  |
| C(21) | 44(1) | 24(1) | 24(1) | 4(1)  | -5(1) | 3(1)  |
| C(22) | 34(1) | 20(1) | 28(1) | 3(1)  | 2(1)  | 4(1)  |

S1. Crystallographic data for structure **10** (deposition number CCDC 935741) reported in this paper have been deposited with the Cambridge Crystallographic Data Centre. Copies of the data can be obtained, free of charge, on application to the Director, CCDC, 12 Union Road, Cambridge CB2 1EZ, UK (fax: +44-(0) 1223-336033 or e-mail: [deposit@ccdc.cam.ac.uk](mailto:deposit@ccdc.cam.ac.uk)).
